# Supplementary material
Source: MDPI journal article supplement (https://www.mdpi.com/2304-6740/5/3/49)

# checkCIF/PLATON report

Structure factors have been supplied for datablock(s) 1\_AsF6\_120K\_SQUEEZE,  
1\_PF6\_120K\_SQUEEZE

THIS REPORT IS FOR GUIDANCE ONLY. IF USED AS PART OF A REVIEW PROCEDURE  
FOR PUBLICATION, IT SHOULD NOT REPLACE THE EXPERTISE OF AN EXPERIENCED  
CRYSTALLOGRAPHIC REFEREE.

No syntax errors found.      CIF dictionary      Interpreting this report

## Datablock: 1\_PF6\_120K\_SQUEEZE

---

Bond precision:    C-C = 0.0092 Å                      Wavelength=0.71070

Cell:                      a=19.049(6)              b=19.056(5)              c=20.600(9)  
                            alpha=90              beta=115.832(3)              gamma=90  
Temperature:              120 K

|                        | Calculated                              | Reported                                                      |
|------------------------|-----------------------------------------|---------------------------------------------------------------|
| Volume                 | 6731(4)                                 | 6731(4)                                                       |
| Space group            | C 2/c                                   | C 2/c                                                         |
| Hall group             | -C 2yc                                  | -C 2yc                                                        |
| Moiety formula         | C46 H52 Fe2 N20, 4(F6 P)<br>[+ solvent] | C46 H52 Fe2 N20 2+, (P F6<br>1-)4, (H2 O)1.5, (C2 H3<br>N)1.5 |
| Sum formula            | C46 H52 F24 Fe2 N20 P4 [+<br>solvent]   | C49 H59.50 F24 Fe2 N21.50<br>O1.50 P4                         |
| Mr                     | 1576.66                                 | 1665.26                                                       |
| Dx, g cm <sup>-3</sup> | 1.556                                   | 1.643                                                         |
| Z                      | 4                                       | 4                                                             |
| Mu (mm <sup>-1</sup> ) | 0.642                                   | 0.649                                                         |
| F000                   | 3184.0                                  | 3376.0                                                        |
| F000'                  | 3190.41                                 |                                                               |
| h,k,lmax               | 24,24,26                                | 24,24,26                                                      |
| Nref                   | 7714                                    | 7550                                                          |
| Tmin,Tmax              | 0.897,0.937                             | 0.900,0.962                                                   |
| Tmin'                  | 0.878                                   |                                                               |

Correction method= # Reported T Limits: Tmin=0.900 Tmax=0.962  
AbsCorr = NUMERICAL

Data completeness= 0.979                      Theta(max)= 27.469

R(reflections)= 0.0879( 5906)              wR2(reflections)= 0.2286( 7550)

S = 1.131                      Npar= 544

---

The following ALERTS were generated. Each ALERT has the format  
**test-name\_ALERT\_alert-type\_alert-level.**  
Click on the hyperlinks for more details of the test.

---

### Alert level B

CHEMW03\_ALERT\_2\_B WARNING: The ratio of given/expected molecular weight as  
calculated from the \_atom\_site\* data lies outside  
the range 0.95 <> 1.05

From the CIF: \_cell\_formula\_units\_Z 4  
From the CIF: \_chemical\_formula\_weight 1665.26  
TEST: Calculate formula weight from \_atom\_site\_\*  
atom mass num sum  
C 12.01 46.00 552.51  
H 1.01 52.00 52.42  
N 14.01 20.00 280.14  
F 19.00 24.00 455.95  
P 30.97 4.00 123.90  
Fe 55.85 2.00 111.69  
O 16.00 0.00 0.00  
Calculated formula weight 1576.60

### Alert level C

PLAT341\_ALERT\_3\_C Low Bond Precision on C-C Bonds ..... 0.00922 Ang.  
PLAT906\_ALERT\_3\_C Large K value in the Analysis of Variance ..... 9.243 Check  
PLAT906\_ALERT\_3\_C Large K value in the Analysis of Variance ..... 2.778 Check  
PLAT910\_ALERT\_3\_C Missing # of FCF Reflection(s) Below Theta(Min) 9 Note  
PLAT911\_ALERT\_3\_C Missing # FCF Refl Between THmin & STh/L= 0.600 19 Report  
PLAT978\_ALERT\_2\_C Number C-C Bonds with Positive Residual Density. 0 Note

### Alert level G

FORMU01\_ALERT\_2\_G There is a discrepancy between the atom counts in the  
\_chemical\_formula\_sum and the formula from the \_atom\_site\* data.  
Atom count from \_chemical\_formula\_sum: C49 H59.5 F24 Fe2 N21.5 O1.5 P  
Atom count from the \_atom\_site data: C46 H52 F24 Fe2 N20 P4

CELLZ01\_ALERT\_1\_G Difference between formula and atom\_site contents detected.

CELLZ01\_ALERT\_1\_G ALERT: Large difference may be due to a  
symmetry error - see SYMMG tests

From the CIF: \_cell\_formula\_units\_Z 4  
From the CIF: \_chemical\_formula\_sum C49 H59.50 F24 Fe2 N21.50 O1.50  
TEST: Compare cell contents of formula and atom\_site data

| atom | Z*formula | cif sites | diff  |
|------|-----------|-----------|-------|
| C    | 196.00    | 184.00    | 12.00 |
| H    | 238.00    | 208.00    | 30.00 |
| F    | 96.00     | 96.00     | 0.00  |
| Fe   | 8.00      | 8.00      | 0.00  |
| N    | 86.00     | 80.00     | 6.00  |
| O    | 6.00      | 0.00      | 6.00  |
| P    | 16.00     | 16.00     | 0.00  |

PLAT003\_ALERT\_2\_G Number of Uiso or Uij Restrained non-H Atoms ... 26 Report  
PLAT014\_ALERT\_1\_G N.O.K. \_shelx\_fab\_checksum found in CIF ..... Please Check  
PLAT041\_ALERT\_1\_G Calc. and Reported SumFormula Strings Differ Please Check  
PLAT042\_ALERT\_1\_G Calc. and Reported MoietyFormula Strings Differ Please Check  
PLAT044\_ALERT\_1\_G Calculated and Reported Density Dx Differ by .. 0.0871 Check  
PLAT068\_ALERT\_1\_G Reported F000 Differs from Calcd (or Missing)... Please Check  
PLAT083\_ALERT\_2\_G SHELXL Second Parameter in WGHT Unusually Large 27.41 Why ?  
PLAT176\_ALERT\_4\_G The CIF-Embedded .res File Contains SADI Records 6 Report

|                   |                                                  |           |
|-------------------|--------------------------------------------------|-----------|
| PLAT187_ALERT_4_G | The CIF-Embedded .res File Contains RIGU Records | 1 Report  |
| PLAT244_ALERT_4_G | Low 'Solvent' Ueq as Compared to Neighbors of    | P1 Check  |
| PLAT244_ALERT_4_G | Low 'Solvent' Ueq as Compared to Neighbors of    | P2 Check  |
| PLAT302_ALERT_4_G | Anion/Solvent/Minor-Residue Disorder (Resd 2)..  | 86 % Note |
| PLAT302_ALERT_4_G | Anion/Solvent/Minor-Residue Disorder (Resd 3)..  | 86 % Note |
| PLAT432_ALERT_2_G | Short Inter X...Y Contact F3A .. C12 ..          | 2.87 Ang. |
| PLAT432_ALERT_2_G | Short Inter X...Y Contact F3A .. C13 ..          | 2.89 Ang. |
| PLAT432_ALERT_2_G | Short Inter X...Y Contact F1B .. C22 ..          | 2.96 Ang. |
| PLAT605_ALERT_4_G | Largest Solvent Accessible VOID in the Structure | 223 A**3  |
| PLAT860_ALERT_3_G | Number of Least-Squares Restraints .....         | 252 Note  |
| PLAT869_ALERT_4_G | ALERTS Related to the use of SQUEEZE Suppressed  | ! Info    |
| PLAT912_ALERT_4_G | Missing # of FCF Reflections Above STh/L= 0.600  | 136 Note  |

---

0 **ALERT level A** = Most likely a serious problem - resolve or explain  
 1 **ALERT level B** = A potentially serious problem, consider carefully  
 6 **ALERT level C** = Check. Ensure it is not caused by an omission or oversight  
 23 **ALERT level G** = General information/check it is not something unexpected

7 ALERT type 1 CIF construction/syntax error, inconsistent or missing data  
 8 ALERT type 2 Indicator that the structure model may be wrong or deficient  
 6 ALERT type 3 Indicator that the structure quality may be low  
 9 ALERT type 4 Improvement, methodology, query or suggestion  
 0 ALERT type 5 Informative message, check

---

## Datablock: 1\_AsF6\_120K\_SQUEEZE

---

Bond precision: C-C = 0.0062 A

Wavelength=0.71070

Cell: a=19.410(3) b=19.034(3) c=20.772(5)

alpha=90 beta=115.723(2) gamma=90

Temperature: 120 K

|                | Calculated                               | Reported                                                |
|----------------|------------------------------------------|---------------------------------------------------------|
| Volume         | 6914(2)                                  | 6914(2)                                                 |
| Space group    | C 2/c                                    | C 2/c                                                   |
| Hall group     | -C 2yc                                   | -C 2yc                                                  |
| Moiety formula | C46 H52 Fe2 N20, 4(As F6)<br>[+ solvent] | C46 H52 Fe2 N20 2+, (As F6<br>1- )4, (H2 O)3, (C2 H3 N) |
| Sum formula    | C46 H52 As4 F24 Fe2 N20 [+<br>solvent]   | C48 H61 As4 F24 Fe2 N21 O3                              |
| Mr             | 1752.46                                  | 1847.55                                                 |
| Dx,g cm-3      | 1.684                                    | 1.775                                                   |
| Z              | 4                                        | 4                                                       |
| Mu (mm-1)      | 2.433                                    | 2.441                                                   |
| F000           | 3472.0                                   | 3680.0                                                  |
| F000'          | 3477.53                                  |                                                         |
| h,k,lmax       | 25,24,26                                 | 25,24,26                                                |
| Nref           | 7946                                     | 7923                                                    |
| Tmin,Tmax      | 0.568,0.845                              | 0.601,0.921                                             |
| Tmin'          | 0.557                                    |                                                         |

Correction method= # Reported T Limits: Tmin=0.601 Tmax=0.921  
AbsCorr = NUMERICAL

Data completeness= 0.997

Theta(max)= 27.489

R(reflections)= 0.0520( 6650)

wR2(reflections)= 0.1236( 7923)

S = 1.113

Npar= 633

---

The following ALERTS were generated. Each ALERT has the format

**test-name\_ALERT\_alert-type\_alert-level.**

Click on the hyperlinks for more details of the test.

---

### Alert level B

CHEMW03\_ALERT\_2\_B WARNING: The ratio of given/expected molecular weight as  
calculated from the \_atom\_site\* data lies outside  
the range 0.95 <> 1.05

From the CIF: \_cell\_formula\_units\_Z 4

From the CIF: \_chemical\_formula\_weight 1847.55

TEST: Calculate formula weight from \_atom\_site\*

| atom                      | mass  | num   | sum     |
|---------------------------|-------|-------|---------|
| C                         | 12.01 | 46.00 | 552.51  |
| H                         | 1.01  | 52.00 | 52.42   |
| N                         | 14.01 | 20.00 | 280.14  |
| O                         | 16.00 | 0.00  | 0.00    |
| F                         | 19.00 | 24.00 | 455.95  |
| Fe                        | 55.85 | 2.00  | 111.69  |
| As                        | 74.92 | 4.00  | 299.69  |
| Calculated formula weight |       |       | 1752.40 |

---

### Alert level C

PLAT230\_ALERT\_2\_C Hirshfeld Test Diff for C3 -- C4 .. 5.2 s.u.  
PLAT341\_ALERT\_3\_C Low Bond Precision on C-C Bonds ..... 0.00622 Ang.  
PLAT906\_ALERT\_3\_C Large K value in the Analysis of Variance ..... 4.482 Check  
PLAT910\_ALERT\_3\_C Missing # of FCF Reflection(s) Below Theta(Min) 10 Note  
PLAT911\_ALERT\_3\_C Missing # FCF Refl Between THmin & STh/L= 0.600 11 Report

---

### Alert level G

FORMU01\_ALERT\_2\_G There is a discrepancy between the atom counts in the  
\_chemical\_formula\_sum and the formula from the \_atom\_site\* data.  
Atom count from \_chemical\_formula\_sum: C48 H61 As4 F24 Fe2 N21 O3  
Atom count from the \_atom\_site data: C46 H52 As4 F24 Fe2 N20  
CELLZ01\_ALERT\_1\_G Difference between formula and atom\_site contents detected.  
CELLZ01\_ALERT\_1\_G ALERT: Large difference may be due to a  
symmetry error - see SYMMG tests  
From the CIF: \_cell\_formula\_units\_Z 4  
From the CIF: \_chemical\_formula\_sum C48 H61 As4 F24 Fe2 N21 O3  
TEST: Compare cell contents of formula and atom\_site data

| atom | Z*formula | cif sites | diff  |
|------|-----------|-----------|-------|
| C    | 192.00    | 184.00    | 8.00  |
| H    | 244.00    | 208.00    | 36.00 |
| As   | 16.00     | 16.00     | 0.00  |
| F    | 96.00     | 96.00     | 0.00  |
| Fe   | 8.00      | 8.00      | 0.00  |

|   |       |       |       |  |
|---|-------|-------|-------|--|
| N | 84.00 | 80.00 | 4.00  |  |
| O | 12.00 | 0.00  | 12.00 |  |

  

|                   |                                                  |        |              |
|-------------------|--------------------------------------------------|--------|--------------|
| PLAT003_ALERT_2_G | Number of Uiso or Uij Restrained non-H Atoms ... | 37     | Report       |
| PLAT014_ALERT_1_G | N.O.K. _shelx_fab_checksum found in CIF .....    |        | Please Check |
| PLAT041_ALERT_1_G | Calc. and Reported SumFormula Strings Differ     |        | Please Check |
| PLAT042_ALERT_1_G | Calc. and Reported MoietyFormula Strings Differ  |        | Please Check |
| PLAT044_ALERT_1_G | Calculated and Reported Density Dx Differ by ..  | 0.0914 | Check        |
| PLAT068_ALERT_1_G | Reported F000 Differs from Calcd (or Missing)... |        | Please Check |
| PLAT083_ALERT_2_G | SHELXL Second Parameter in WGHT Unusually Large  | 16.34  | Why ?        |
| PLAT171_ALERT_4_G | The CIF-Embedded .res File Contains EADP Records | 2      | Report       |
| PLAT176_ALERT_4_G | The CIF-Embedded .res File Contains SADI Records | 6      | Report       |
| PLAT187_ALERT_4_G | The CIF-Embedded .res File Contains RIGU Records | 1      | Report       |
| PLAT302_ALERT_4_G | Anion/Solvent/Minor-Residue Disorder (Resd 2) .. | 86     | % Note       |
| PLAT302_ALERT_4_G | Anion/Solvent/Minor-Residue Disorder (Resd 3) .. | 86     | % Note       |
| PLAT432_ALERT_2_G | Short Inter X...Y Contact F2C .. C22 ..          | 2.94   | Ang.         |
| PLAT432_ALERT_2_G | Short Inter X...Y Contact F3B .. C12 ..          | 2.90   | Ang.         |
| PLAT432_ALERT_2_G | Short Inter X...Y Contact F3B .. C13 ..          | 2.93   | Ang.         |
| PLAT432_ALERT_2_G | Short Inter X...Y Contact F4B .. C8 ..           | 2.94   | Ang.         |
| PLAT605_ALERT_4_G | Largest Solvent Accessible VOID in the Structure | 229    | A**3         |
| PLAT811_ALERT_5_G | No ADDSYM Analysis: Too Many Excluded Atoms .... |        | ! Info       |
| PLAT860_ALERT_3_G | Number of Least-Squares Restraints .....         | 272    | Note         |
| PLAT869_ALERT_4_G | ALERTS Related to the use of SQUEEZE Suppressed  |        | ! Info       |
| PLAT912_ALERT_4_G | Missing # of FCF Reflections Above STh/L= 0.600  | 4      | Note         |
| PLAT978_ALERT_2_G | Number C-C Bonds with Positive Residual Density. | 1      | Note         |

---

0 **ALERT level A** = Most likely a serious problem - resolve or explain  
1 **ALERT level B** = A potentially serious problem, consider carefully  
5 **ALERT level C** = Check. Ensure it is not caused by an omission or oversight  
25 **ALERT level G** = General information/check it is not something unexpected

7 ALERT type 1 CIF construction/syntax error, inconsistent or missing data  
10 ALERT type 2 Indicator that the structure model may be wrong or deficient  
5 ALERT type 3 Indicator that the structure quality may be low  
8 ALERT type 4 Improvement, methodology, query or suggestion  
1 ALERT type 5 Informative message, check

---

## checkCIF publication errors

---

### Alert level A

PUBL012\_ALERT\_1\_A \_publ\_section\_abstract is missing.  
Abstract of paper in English.

---

1 **ALERT level A** = Data missing that is essential or data in wrong format  
0 **ALERT level G** = General alerts. Data that may be required is missing

---

## Publication of your CIF

You should attempt to resolve as many as possible of the alerts in all categories. Often the minor alerts point to easily fixed oversights, errors and omissions in your CIF or refinement strategy, so attention to these fine details can be worthwhile. In order to resolve some of the more serious problems it may be necessary to carry out additional measurements or structure refinements. However, the nature of your study may justify the reported deviations from journal submission requirements and the more serious of these should be commented upon in the discussion or experimental section of a paper or in the "special\_details" fields of the CIF. *checkCIF* was carefully designed to identify outliers and unusual parameters, but every test has its limitations and alerts that are not important in a particular case may appear. Conversely, the absence of alerts does not guarantee there are no aspects of the results needing attention. It is up to the individual to critically assess their own results and, if necessary, seek expert advice.

If level A alerts remain, which you believe to be justified deviations, and you intend to submit this CIF for publication in a journal, you should additionally insert an explanation in your CIF using the Validation Reply Form (VRF) below. This will allow your explanation to be considered as part of the review process.

## Validation response form

Please find below a validation response form (VRF) that can be filled in and pasted into your CIF.

```
# start Validation Reply Form
_vrf_PUBL012_GLOBAL
;
PROBLEM: _publ_section_abstract is missing.
RESPONSE: ...
;
# end Validation Reply Form
```

If you wish to submit your CIF for publication in Acta Crystallographica Section C or E, you should upload your CIF via the web. If you wish to submit your CIF for publication in IUCrData you should upload your CIF via the web. If your CIF is to form part of a submission to another IUCr journal, you will be asked, either during electronic submission or by the Co-editor handling your paper, to upload your CIF via our web site.

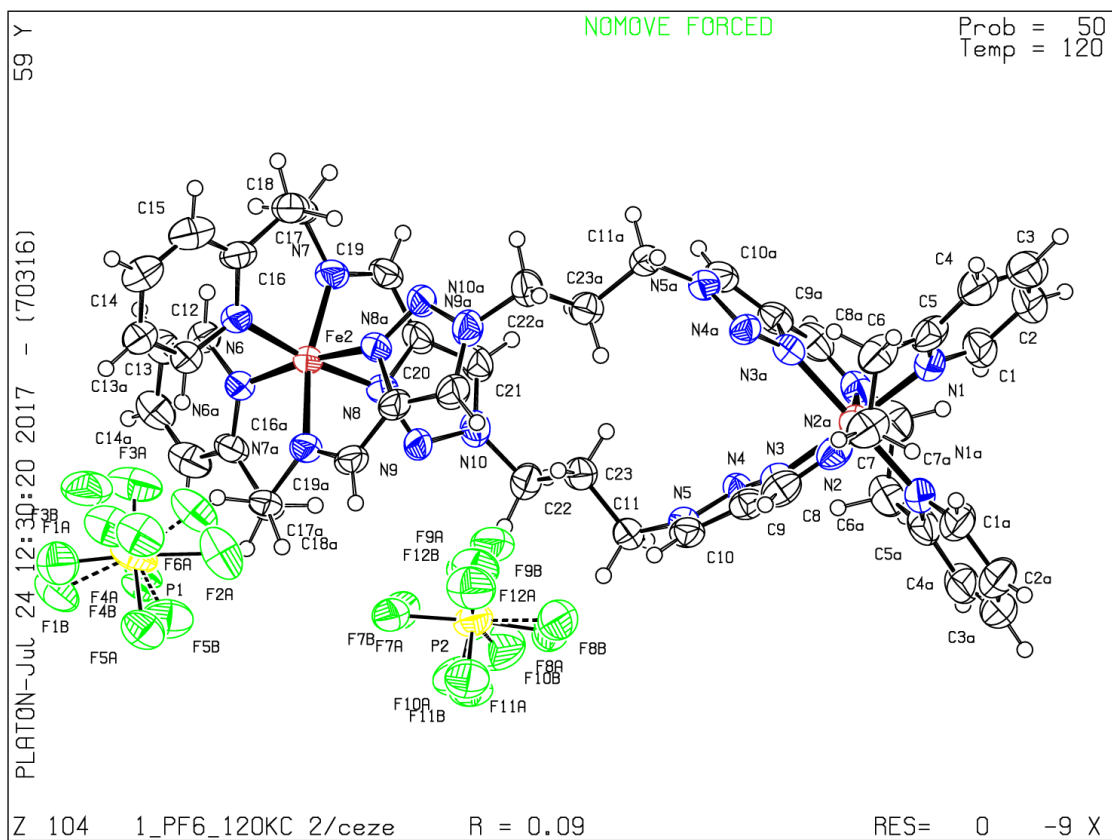

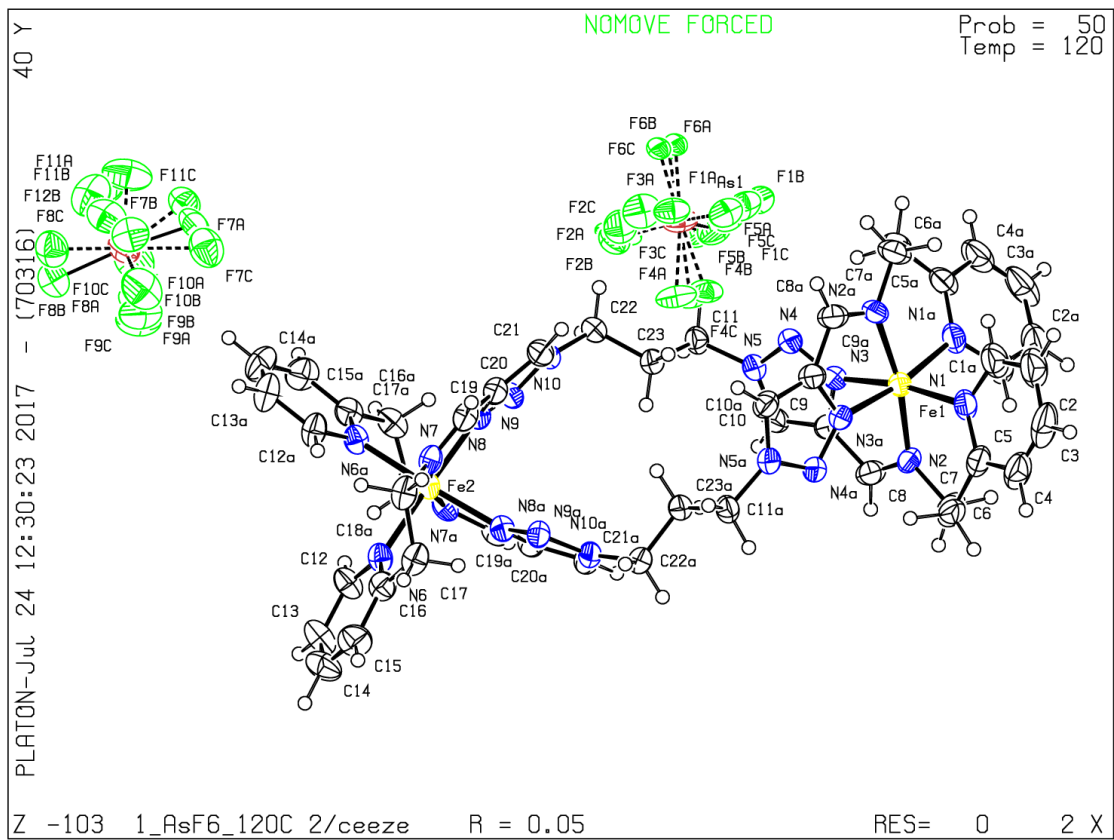

Supplement: s1 [file s1 › Supplementary Files/checkcif.pdf]
