# Supplementary material
Source: MDPI journal article supplement (https://www.mdpi.com/2304-6740/5/3/49)
Supplement: s1 [file s1]

Archive with 2 entries (2 files):
- Supplementary Files/checkcif.pdf
- Supplementary Files/CIF.cif
