# Supplementary material
Source: MDPI journal article supplement (https://www.mdpi.com/2304-6740/5/3/49)
Supplement: s1 [file s1 › Supplementary Files/CIF.cif]

_publ_requested_journal          Inorganics
_publ_contact_author_name        'Hiroaki Hagiwara'
_publ_contact_author_address     
;Department of Chemistry, Faculty of Education 
 Gifu University,
 Yanagido 1-1,
 Gifu 501-1193,
 Japan
;
_publ_contact_author_email       hagiwara@gifu-u.ac.jp
_publ_contact_author_phone       '+81 293 2253'
_publ_contact_author_fax         none
_publ_section_title
;
High-Temperature Wide Thermal Hysteresis of an Iron(II) Dinuclear 
Double Helicate
;
loop_
_publ_author_name
_publ_author_address
'Hora, Shiori'
;Graduate School of Education, 
 Gifu University,
 Yanagido 1-1,
 Gifu 501-1193,
 Japan
;
'Hagiwara, Hiroaki'
;Department of Chemistry, Faculty of Education 
 Gifu University,
 Yanagido 1-1,
 Gifu 501-1193,
 Japan
;
_publ_contact_letter
;
The following data are for two structures described in a paper 
submitted to the special issue ''Spin Crossover-Complexes''of 
Inorganics.
;

#=================================================================

data_1_PF6_120K_SQUEEZE

_audit_creation_method            SHELXL-2014/6
_chemical_name_systematic        
;
1,1'-[propane-1,3-diylbis(1H-1,2,3-triazole-1,4-diyl)]
bis{N-[2-(pyridin-2-yl)ethyl]methanimine}iron(II)
dihexafluorophosphate-water-acetonitrile(1/1.5/1.5)
;
_chemical_name_common             ?
_chemical_melting_point           ?
_chemical_formula_moiety          'C46 H52 Fe2 N20 2+, (P F6 1-)4, (H2 O)1.5, (C2 H3 N)1.5'
_chemical_formula_sum
 'C49 H59.50 F24 Fe2 N21.50 O1.50 P4'
_chemical_formula_weight          1665.26

loop_
 _atom_type_symbol
 _atom_type_description
 _atom_type_scat_dispersion_real
 _atom_type_scat_dispersion_imag
 _atom_type_scat_source
 'C'  'C'   0.0033   0.0016
 'International Tables Vol C Tables 4.2.6.8 and 6.1.1.4'
 'H'  'H'   0.0000   0.0000
 'International Tables Vol C Tables 4.2.6.8 and 6.1.1.4'
 'N'  'N'   0.0061   0.0033
 'International Tables Vol C Tables 4.2.6.8 and 6.1.1.4'
 'F'  'F'   0.0171   0.0103
 'International Tables Vol C Tables 4.2.6.8 and 6.1.1.4'
 'P'  'P'   0.1023   0.0942
 'International Tables Vol C Tables 4.2.6.8 and 6.1.1.4'
 'Fe'  'Fe'   0.3463   0.8444
 'International Tables Vol C Tables 4.2.6.8 and 6.1.1.4'
 'O'  'O'   0.0106   0.0060
 'International Tables Vol C Tables 4.2.6.8 and 6.1.1.4'

_space_group_crystal_system       monoclinic
_space_group_IT_number            15
_space_group_name_H-M_alt         'C 2/c'
_space_group_name_Hall            '-C 2yc'

_shelx_space_group_comment
;
The symmetry employed for this shelxl refinement is uniquely defined
by the following loop, which should always be used as a source of
symmetry information in preference to the above space-group names.
They are only intended as comments.
;

loop_
 _space_group_symop_operation_xyz
 'x, y, z'
 '-x, y, -z+1/2'
 'x+1/2, y+1/2, z'
 '-x+1/2, y+1/2, -z+1/2'
 '-x, -y, -z'
 'x, -y, z-1/2'
 '-x+1/2, -y+1/2, -z'
 'x+1/2, -y+1/2, z-1/2'

_cell_length_a                    19.049(6)
_cell_length_b                    19.056(5)
_cell_length_c                    20.600(9)
_cell_angle_alpha                 90
_cell_angle_beta                  115.832(3)
_cell_angle_gamma                 90
_cell_volume                      6731(4)
_cell_formula_units_Z             4
_cell_measurement_temperature     120(2)

_cell_measurement_reflns_used     7322

_cell_measurement_theta_min       3.0211

_cell_measurement_theta_max       27.4817


_exptl_crystal_description        Block

_exptl_crystal_colour             Dark-red

_exptl_crystal_density_meas       ?
_exptl_crystal_density_method     'not measured'
_exptl_crystal_density_diffrn     1.643
_exptl_crystal_F_000              3376

_exptl_crystal_size_max           0.2000

_exptl_crystal_size_mid           0.1400

_exptl_crystal_size_min           0.1000

_exptl_absorpt_coefficient_mu     0.649
_shelx_estimated_absorpt_T_min    0.881
_shelx_estimated_absorpt_T_max    0.938
_exptl_absorpt_correction_type    numerical

_exptl_absorpt_correction_T_min   0.8997

_exptl_absorpt_correction_T_max   0.9623

_exptl_absorpt_process_details    'NUMABS (Rigaku, 1999)'

_diffrn_ambient_temperature       120(2)

_diffrn_radiation_wavelength      0.7107
_diffrn_radiation_type            MoK\a
_diffrn_source                    ?
_diffrn_measurement_device_type   'Rigaku/MSC Mercury CCD'

_diffrn_measurement_method        dtprofit.ref

_diffrn_detector_area_resol_mean  14.7059

_diffrn_reflns_number             25996
_diffrn_reflns_av_unetI/netI      0.0553
_diffrn_reflns_av_R_equivalents   0.0505
_diffrn_reflns_limit_h_min        -24
_diffrn_reflns_limit_h_max        23
_diffrn_reflns_limit_k_min        -20
_diffrn_reflns_limit_k_max        24
_diffrn_reflns_limit_l_min        -23
_diffrn_reflns_limit_l_max        26
_diffrn_reflns_theta_min          3.025
_diffrn_reflns_theta_max          27.469
_diffrn_reflns_theta_full         25.241
_diffrn_measured_fraction_theta_max   0.979
_diffrn_measured_fraction_theta_full  0.995
_diffrn_reflns_Laue_measured_fraction_max    0.979
_diffrn_reflns_Laue_measured_fraction_full   0.995
_diffrn_reflns_point_group_measured_fraction_max   0.979
_diffrn_reflns_point_group_measured_fraction_full  0.995
_reflns_number_total              7550
_reflns_number_gt                 5906
_reflns_threshold_expression      'I > 2\s(I)'
_reflns_Friedel_coverage          0.000
_reflns_Friedel_fraction_max      .
_reflns_Friedel_fraction_full     .

_reflns_special_details
;
 Reflections were merged by SHELXL according to the crystal
 class for the calculation of statistics and refinement.

 Structure factors included contributions from the .fab file.

 _reflns_Friedel_fraction is defined as the number of unique
 Friedel pairs measured divided by the number that would be
 possible theoretically, ignoring centric projections and
 systematic absences.
;

_computing_data_collection        'CrystalClear (Rigaku/MSC Inc., 2006)'
_computing_cell_refinement        'CrystalClear (Rigaku/MSC Inc., 2006)'
_computing_data_reduction         'CrystalClear (Rigaku/MSC Inc., 2006)'
_computing_structure_solution     'SIR2014 (Burla, et al., 2014)'

_computing_structure_refinement 'SHELXL-2014/6 (Sheldrick, 2014)'
_computing_molecular_graphics 'Yadokari-XG 2009 (Wakita Nemoto et al., 2009)'

_computing_publication_material
;Yadokari-XG 2009 (Wakita,Nemoto et al., 2009)
;

_refine_special_details
;
Refinement of F^2^ against ALL reflections. The weighted R-factor wR and
goodness of fit S are based on F^2^, conventional R-factors R are based
on F, with F set to zero for negative F^2^. The threshold expression of
F^2^ > 2\s(F^2^) is used only for calculating R-factors(gt) etc. and is
not relevant to the choice of reflections for refinement. R-factors based
on F^2^ are statistically about twice as large as those based on F, and R-
factors based on ALL data will be even larger.

The structure contains two disordered PF~6~^-^ ions. Both PF~6~^-^ ions were 
disordered over two positions and the occupancy factors for the possible two 
positions of F atoms (F1A--F6A:F1B--F6B = 0.518(15):0.482(15) for P(1)F~6~^-^ 
and F7A--F12A:F7B--F12B = 0.635(16):0.365(16) for P(2)F~6~^-^) were refined 
using the tools available from the SHELXL-2014 program package. In the 
refinement of these disordered PF~6~^-^ ions, the SADI command for all P--F 
bonds and F...F distances and the RIGU command for all P and F atoms were 
also applied.
;
_refine_ls_structure_factor_coef  Fsqd
_refine_ls_matrix_type            full
_refine_ls_weighting_scheme       calc
_refine_ls_weighting_details
'w=1/[\s^2^(Fo^2^)+(0.0791P)^2^+27.4133P] where P=(Fo^2^+2Fc^2^)/3'
_atom_sites_solution_primary      direct
_atom_sites_solution_secondary    difmap
_atom_sites_solution_hydrogens    geom
_refine_ls_hydrogen_treatment     constr

_refine_ls_extinction_method      none
_refine_ls_extinction_coef        .
_refine_ls_number_reflns          7550
_refine_ls_number_parameters      544
_refine_ls_number_restraints      252
_refine_ls_R_factor_all           0.1054
_refine_ls_R_factor_gt            0.0879
_refine_ls_wR_factor_ref          0.2286
_refine_ls_wR_factor_gt           0.2141
_refine_ls_goodness_of_fit_ref    1.131
_refine_ls_restrained_S_all       1.142
_refine_ls_shift/su_max           0.000
_refine_ls_shift/su_mean          0.000

loop_
 _atom_site_label
 _atom_site_type_symbol
 _atom_site_fract_x
 _atom_site_fract_y
 _atom_site_fract_z
 _atom_site_U_iso_or_equiv
 _atom_site_adp_type
 _atom_site_occupancy
 _atom_site_site_symmetry_order
 _atom_site_calc_flag
 _atom_site_refinement_flags_posn
 _atom_site_refinement_flags_adp
 _atom_site_refinement_flags_occupancy
 _atom_site_disorder_assembly
 _atom_site_disorder_group
C12 C 0.1100(3) 0.0286(3) 0.7907(3) 0.0483(12) Uani 1 1 d . . . . .
H13 H 0.0933 0.0279 0.7400 0.058 Uiso 1 1 calc R U . . .
C13 C 0.1697(4) -0.0172(3) 0.8325(3) 0.0560(14) Uani 1 1 d . . . . .
H14 H 0.1928 -0.0470 0.8102 0.067 Uiso 1 1 calc R U . . .
C14 C 0.1950(4) -0.0194(3) 0.9054(3) 0.0602(14) Uani 1 1 d . . . . .
H15 H 0.2358 -0.0498 0.9353 0.072 Uiso 1 1 calc R U . . .
C15 C 0.1589(3) 0.0239(4) 0.9324(3) 0.0616(15) Uani 1 1 d . . . . .
H16 H 0.1743 0.0235 0.9829 0.074 Uiso 1 1 calc R U . . .
C16 C 0.0991(3) 0.0699(3) 0.8887(3) 0.0475(12) Uani 1 1 d . . . . .
C17 C 0.0598(3) 0.1158(3) 0.9208(3) 0.0548(14) Uani 1 1 d . . . . .
H17 H 0.0817 0.1637 0.9258 0.066 Uiso 1 1 calc R U . . .
H18 H 0.0720 0.0984 0.9699 0.066 Uiso 1 1 calc R U . . .
C18 C -0.0303(3) 0.1200(3) 0.8768(3) 0.0487(12) Uani 1 1 d . . . . .
H19 H -0.0519 0.0718 0.8665 0.058 Uiso 1 1 calc R U . . .
H20 H -0.0527 0.1438 0.9062 0.058 Uiso 1 1 calc R U . . .
C19 C -0.1032(3) 0.2095(3) 0.7923(3) 0.0464(12) Uani 1 1 d . . . . .
H21 H -0.1303 0.2205 0.8202 0.056 Uiso 1 1 calc R U . . .
C20 C -0.1141(3) 0.2488(3) 0.7299(3) 0.0463(12) Uani 1 1 d . . . . .
C21 C -0.1492(3) 0.3100(3) 0.6951(3) 0.0519(13) Uani 1 1 d . . . . .
H22 H -0.1817 0.3406 0.7065 0.062 Uiso 1 1 calc R U . . .
C22 C -0.1384(3) 0.3743(3) 0.5932(3) 0.0519(12) Uani 1 1 d . . . . .
H23 H -0.1928 0.3916 0.5738 0.062 Uiso 1 1 calc R U . . .
H24 H -0.1287 0.3578 0.5523 0.062 Uiso 1 1 calc R U . . .
C1 C -0.0266(4) 0.8355(3) 0.8216(3) 0.0669(17) Uani 1 1 d . . . . .
H1 H -0.0745 0.8351 0.7792 0.080 Uiso 1 1 calc R U . . .
C2 C -0.0174(5) 0.8825(4) 0.8749(4) 0.080(2) Uani 1 1 d . . . . .
H2 H -0.0577 0.9147 0.8696 0.096 Uiso 1 1 calc R U . . .
C3 C 0.0543(6) 0.8815(4) 0.9388(4) 0.087(3) Uani 1 1 d . . . . .
H3 H 0.0616 0.9125 0.9774 0.105 Uiso 1 1 calc R U . . .
C4 C 0.1120(5) 0.8368(4) 0.9447(3) 0.073(2) Uani 1 1 d . . . . .
H4 H 0.1599 0.8366 0.9872 0.088 Uiso 1 1 calc R U . . .
C5 C 0.1009(4) 0.7915(3) 0.8890(3) 0.0574(15) Uani 1 1 d . . . . .
C6 C 0.1691(3) 0.7455(3) 0.8961(3) 0.0595(15) Uani 1 1 d . . . . .
H5 H 0.2174 0.7633 0.9361 0.071 Uiso 1 1 calc R U . . .
H6 H 0.1602 0.6971 0.9085 0.071 Uiso 1 1 calc R U . . .
C7 C 0.1796(4) 0.7439(3) 0.8293(3) 0.0625(15) Uani 1 1 d . . . . .
H7 H 0.2285 0.7190 0.8381 0.075 Uiso 1 1 calc R U . . .
H8 H 0.1834 0.7924 0.8139 0.075 Uiso 1 1 calc R U . . .
C8 C 0.1272(3) 0.6576(3) 0.7377(3) 0.0538(13) Uani 1 1 d . . . . .
H9 H 0.1787 0.6466 0.7450 0.065 Uiso 1 1 calc R U . . .
C9 C 0.0595(3) 0.6192(3) 0.6877(3) 0.0438(11) Uani 1 1 d . . . . .
C10 C 0.0437(3) 0.5592(3) 0.6469(3) 0.0464(12) Uani 1 1 d . . . . .
H10 H 0.0802 0.5306 0.6391 0.056 Uiso 1 1 calc R U . . .
C11 C -0.0834(3) 0.4895(3) 0.5800(3) 0.0460(11) Uani 1 1 d . . . . .
H11 H -0.0630 0.4700 0.5470 0.055 Uiso 1 1 calc R U . . .
H12 H -0.1376 0.5053 0.5506 0.055 Uiso 1 1 calc R U . . .
C23 C -0.0820(3) 0.4335(3) 0.6327(3) 0.0452(11) Uani 1 1 d . . . . .
H25 H -0.0968 0.4545 0.6689 0.054 Uiso 1 1 calc R U . . .
H26 H -0.0286 0.4143 0.6584 0.054 Uiso 1 1 calc R U . . .
P1 P 0.21573(8) 0.00392(10) 0.64617(8) 0.0597(4) Uani 1 1 d . U . . .
P2 P 0.10248(9) 0.35263(9) 0.56765(8) 0.0560(4) Uani 1 1 d . U . . .
F1A F 0.2224(7) -0.0730(6) 0.6334(7) 0.070(3) Uani 0.518(15) 1 d . U P A 1
F2A F 0.2072(4) 0.0932(5) 0.6534(7) 0.077(3) Uani 0.518(15) 1 d . U P A 1
F3A F 0.1809(5) -0.0058(8) 0.6973(4) 0.082(3) Uani 0.518(15) 1 d . U P A 1
F4B F 0.1279(11) 0.0060(12) 0.5746(9) 0.039(2) Uani 0.482(15) 1 d . U P A 2
F5A F 0.2535(7) 0.0241(6) 0.5937(7) 0.065(2) Uani 0.518(15) 1 d . U P A 1
F6B F 0.3028(7) -0.0177(8) 0.7118(7) 0.074(3) Uani 0.482(15) 1 d . U P A 2
F7A F 0.1205(5) 0.2683(4) 0.5725(5) 0.0567(18) Uani 0.635(16) 1 d . U P B 1
F8A F 0.0862(8) 0.4329(5) 0.5579(7) 0.082(3) Uani 0.635(16) 1 d . U P B 1
F9A F 0.0372(6) 0.3393(6) 0.5901(7) 0.085(3) Uani 0.635(16) 1 d . U P B 1
F10A F 0.0384(5) 0.3394(5) 0.4834(4) 0.085(3) Uani 0.635(16) 1 d . U P B 1
F11A F 0.1711(6) 0.3577(7) 0.5436(6) 0.071(3) Uani 0.635(16) 1 d . U P B 1
F12A F 0.1690(7) 0.3540(8) 0.6490(6) 0.083(3) Uani 0.635(16) 1 d . U P B 1
N6 N 0.0747(3) 0.0734(2) 0.8167(2) 0.0434(9) Uani 1 1 d . . . . .
N7 N -0.0538(2) 0.1576(2) 0.8089(2) 0.0436(9) Uani 1 1 d . . . . .
N8 N -0.0733(3) 0.2205(2) 0.6963(2) 0.0439(9) Uani 1 1 d . . . . .
N9 N -0.0815(3) 0.2629(2) 0.6434(2) 0.0453(10) Uani 1 1 d . . . . .
N10 N -0.1277(3) 0.3167(2) 0.6428(2) 0.0479(10) Uani 1 1 d . . . . .
N1 N 0.0294(3) 0.7898(2) 0.8268(2) 0.0522(11) Uani 1 1 d . . . . .
N2 N 0.1120(3) 0.7073(2) 0.7713(2) 0.0482(10) Uani 1 1 d . . . . .
N3 N -0.0119(2) 0.6416(2) 0.6829(2) 0.0391(8) Uani 1 1 d . . . . .
N4 N -0.0694(2) 0.5986(2) 0.6414(2) 0.0390(8) Uani 1 1 d . . . . .
N5 N -0.0353(2) 0.5490(2) 0.6196(2) 0.0421(9) Uani 1 1 d . . . . .
Fe2 Fe 0.0000 0.14624(5) 0.7500 0.0419(3) Uani 1 2 d S T P . .
Fe1 Fe 0.0000 0.71653(5) 0.7500 0.0437(3) Uani 1 2 d S T P . .
F10B F 0.0176(9) 0.3743(11) 0.5042(8) 0.099(5) Uani 0.365(16) 1 d . U P B 2
F9B F 0.0655(10) 0.3613(8) 0.6247(8) 0.072(4) Uani 0.365(16) 1 d . U P B 2
F7B F 0.0851(13) 0.2743(9) 0.5605(10) 0.078(4) Uani 0.365(16) 1 d . U P B 2
F8B F 0.1204(11) 0.4411(9) 0.5856(11) 0.075(4) Uani 0.365(16) 1 d . U P B 2
F11B F 0.1431(12) 0.3611(12) 0.5194(9) 0.074(4) Uani 0.365(16) 1 d . U P B 2
F12B F 0.1878(11) 0.3532(14) 0.6382(11) 0.081(4) Uani 0.365(16) 1 d . U P B 2
F2B F 0.2062(5) 0.0607(7) 0.6905(6) 0.074(3) Uani 0.482(15) 1 d . U P A 2
F3B F 0.1876(7) -0.0540(8) 0.6915(4) 0.085(3) Uani 0.482(15) 1 d . U P A 2
F6A F 0.3068(7) 0.0150(7) 0.7087(7) 0.069(3) Uani 0.518(15) 1 d . U P A 1
F5B F 0.2409(9) 0.0471(8) 0.6009(8) 0.077(3) Uani 0.482(15) 1 d . U P A 2
F1B F 0.2233(9) -0.0709(7) 0.6068(6) 0.076(3) Uani 0.482(15) 1 d . U P A 2
F4A F 0.1238(11) 0.0077(13) 0.5882(8) 0.048(3) Uani 0.518(15) 1 d . U P A 1

loop_
 _atom_site_aniso_label
 _atom_site_aniso_U_11
 _atom_site_aniso_U_22
 _atom_site_aniso_U_33
 _atom_site_aniso_U_23
 _atom_site_aniso_U_13
 _atom_site_aniso_U_12
C12 0.063(3) 0.042(3) 0.045(3) 0.002(2) 0.028(3) 0.006(2)
C13 0.071(4) 0.050(3) 0.055(3) 0.010(2) 0.035(3) 0.008(3)
C14 0.059(3) 0.066(4) 0.053(3) 0.016(3) 0.022(3) 0.001(3)
C15 0.057(3) 0.081(4) 0.044(3) 0.006(3) 0.020(3) -0.015(3)
C16 0.059(3) 0.052(3) 0.035(2) 0.001(2) 0.024(2) -0.012(2)
C17 0.076(4) 0.053(3) 0.043(3) -0.008(2) 0.033(3) -0.020(3)
C18 0.070(3) 0.048(3) 0.045(3) -0.004(2) 0.041(3) -0.009(2)
C19 0.055(3) 0.047(3) 0.051(3) -0.013(2) 0.036(3) -0.011(2)
C20 0.055(3) 0.041(3) 0.060(3) -0.008(2) 0.041(3) -0.001(2)
C21 0.059(3) 0.043(3) 0.069(3) -0.003(2) 0.042(3) 0.006(2)
C22 0.063(3) 0.039(3) 0.052(3) 0.005(2) 0.023(3) 0.003(2)
C1 0.093(5) 0.048(3) 0.050(3) -0.007(3) 0.023(3) 0.002(3)
C2 0.121(6) 0.052(4) 0.066(4) -0.014(3) 0.040(4) 0.000(4)
C3 0.148(8) 0.062(4) 0.053(4) -0.020(3) 0.045(5) -0.041(5)
C4 0.105(6) 0.056(4) 0.044(3) -0.008(3) 0.019(4) -0.036(4)
C5 0.071(4) 0.048(3) 0.039(3) 0.003(2) 0.011(3) -0.023(3)
C6 0.059(3) 0.057(3) 0.045(3) 0.006(3) 0.006(3) -0.017(3)
C7 0.056(3) 0.067(4) 0.049(3) 0.002(3) 0.008(3) -0.022(3)
C8 0.044(3) 0.061(4) 0.055(3) 0.013(3) 0.020(3) -0.003(2)
C9 0.038(2) 0.052(3) 0.045(3) 0.009(2) 0.022(2) 0.004(2)
C10 0.051(3) 0.051(3) 0.047(3) 0.008(2) 0.030(2) 0.010(2)
C11 0.059(3) 0.040(3) 0.042(3) 0.000(2) 0.025(2) 0.007(2)
C23 0.046(3) 0.047(3) 0.044(3) 0.003(2) 0.021(2) 0.006(2)
P1 0.0406(7) 0.0957(12) 0.0438(7) -0.0131(7) 0.0194(6) 0.0089(7)
P2 0.0614(9) 0.0619(9) 0.0570(8) 0.0170(7) 0.0371(8) 0.0135(7)
F1A 0.062(5) 0.075(4) 0.076(7) 0.008(4) 0.032(5) 0.021(3)
F2A 0.050(4) 0.081(5) 0.089(6) -0.032(4) 0.018(4) 0.003(3)
F3A 0.070(5) 0.133(9) 0.054(4) 0.001(5) 0.036(4) 0.017(5)
F4B 0.040(4) 0.051(5) 0.035(5) -0.010(4) 0.024(3) 0.006(3)
F5A 0.053(4) 0.079(6) 0.074(5) -0.009(4) 0.039(4) 0.002(4)
F6B 0.050(4) 0.109(9) 0.055(4) -0.006(5) 0.015(3) 0.011(5)
F7A 0.070(4) 0.057(3) 0.048(3) 0.008(2) 0.030(4) 0.009(3)
F8A 0.116(8) 0.061(4) 0.099(7) 0.022(4) 0.074(6) 0.027(4)
F9A 0.086(5) 0.095(6) 0.108(7) 0.036(5) 0.074(5) 0.023(4)
F10A 0.078(4) 0.109(6) 0.057(3) 0.027(3) 0.021(3) 0.011(4)
F11A 0.070(5) 0.079(5) 0.087(6) 0.004(5) 0.055(5) -0.001(4)
F12A 0.101(6) 0.091(5) 0.059(4) -0.006(3) 0.037(4) -0.003(5)
N6 0.060(3) 0.037(2) 0.040(2) -0.0038(16) 0.028(2) -0.0093(18)
N7 0.053(2) 0.044(2) 0.043(2) -0.0057(17) 0.029(2) -0.0109(18)
N8 0.057(2) 0.039(2) 0.052(2) 0.0009(17) 0.039(2) -0.0034(18)
N9 0.060(3) 0.033(2) 0.058(2) 0.0054(18) 0.040(2) 0.0091(18)
N10 0.052(2) 0.037(2) 0.064(3) 0.0009(19) 0.033(2) 0.0037(18)
N1 0.074(3) 0.037(2) 0.047(2) 0.0015(18) 0.027(2) -0.002(2)
N2 0.047(2) 0.047(2) 0.044(2) 0.0065(19) 0.013(2) -0.0100(19)
N3 0.040(2) 0.042(2) 0.0371(19) 0.0054(16) 0.0181(18) 0.0002(16)
N4 0.040(2) 0.038(2) 0.043(2) -0.0030(16) 0.0226(18) 0.0019(16)
N5 0.050(2) 0.039(2) 0.043(2) 0.0019(17) 0.026(2) 0.0038(17)
Fe2 0.0590(6) 0.0353(5) 0.0445(5) 0.000 0.0347(5) 0.000
Fe1 0.0477(6) 0.0384(5) 0.0386(5) 0.000 0.0130(5) 0.000
F10B 0.088(6) 0.126(11) 0.074(7) 0.028(6) 0.027(5) 0.021(6)
F9B 0.087(8) 0.079(8) 0.067(7) 0.009(5) 0.050(6) 0.012(6)
F7B 0.106(11) 0.064(5) 0.068(7) 0.012(4) 0.042(8) 0.003(5)
F8B 0.088(9) 0.067(5) 0.086(9) 0.014(5) 0.054(7) 0.020(5)
F11B 0.101(10) 0.078(7) 0.063(7) 0.017(6) 0.055(7) 0.018(8)
F12B 0.072(6) 0.100(9) 0.075(7) 0.010(6) 0.035(5) 0.021(5)
F2B 0.059(4) 0.095(7) 0.063(5) -0.033(5) 0.022(4) 0.002(4)
F3B 0.106(6) 0.103(7) 0.044(4) -0.011(4) 0.032(4) -0.025(5)
F6A 0.042(3) 0.094(8) 0.058(4) -0.005(5) 0.009(3) 0.006(4)
F5B 0.061(6) 0.108(8) 0.069(5) -0.005(5) 0.035(4) -0.016(5)
F1B 0.080(6) 0.090(5) 0.050(5) -0.012(4) 0.022(5) 0.030(4)
F4A 0.038(4) 0.072(5) 0.039(5) -0.019(5) 0.020(4) 0.010(3)

_geom_special_details
;
 All esds (except the esd in the dihedral angle between two l.s. planes)
 are estimated using the full covariance matrix.  The cell esds are taken
 into account individually in the estimation of esds in distances, angles
 and torsion angles; correlations between esds in cell parameters are only
 used when they are defined by crystal symmetry.  An approximate (isotropic)
 treatment of cell esds is used for estimating esds involving l.s. planes.
;

loop_
 _geom_bond_atom_site_label_1
 _geom_bond_atom_site_label_2
 _geom_bond_distance
 _geom_bond_site_symmetry_2
 _geom_bond_publ_flag
C12 N6 1.336(6) . ?
C12 C13 1.395(7) . ?
C12 H13 0.9500 . ?
C13 C14 1.362(8) . ?
C13 H14 0.9500 . ?
C14 C15 1.339(9) . ?
C14 H15 0.9500 . ?
C15 C16 1.408(8) . ?
C15 H16 0.9500 . ?
C16 N6 1.349(6) . ?
C16 C17 1.481(7) . ?
C17 C18 1.556(8) . ?
C17 H17 0.9900 . ?
C17 H18 0.9900 . ?
C18 N7 1.458(6) . ?
C18 H19 0.9900 . ?
C18 H20 0.9900 . ?
C19 N7 1.303(7) . ?
C19 C20 1.421(7) . ?
C19 H21 0.9500 . ?
C20 N8 1.358(5) . ?
C20 C21 1.380(7) . ?
C21 N10 1.316(6) . ?
C21 H22 0.9500 . ?
C22 N10 1.453(6) . ?
C22 C23 1.526(7) . ?
C22 H23 0.9900 . ?
C22 H24 0.9900 . ?
C1 N1 1.344(8) . ?
C1 C2 1.368(8) . ?
C1 H1 0.9500 . ?
C2 C3 1.425(11) . ?
C2 H2 0.9500 . ?
C3 C4 1.354(11) . ?
C3 H3 0.9500 . ?
C4 C5 1.376(8) . ?
C4 H4 0.9500 . ?
C5 N1 1.407(7) . ?
C5 C6 1.520(9) . ?
C6 C7 1.476(8) . ?
C6 H5 0.9900 . ?
C6 H6 0.9900 . ?
C7 N2 1.494(7) . ?
C7 H7 0.9900 . ?
C7 H8 0.9900 . ?
C8 N2 1.278(7) . ?
C8 C9 1.450(7) . ?
C8 H9 0.9500 . ?
C9 C10 1.373(7) . ?
C9 N3 1.385(6) . ?
C10 N5 1.373(6) . ?
C10 H10 0.9500 . ?
C11 N5 1.463(6) . ?
C11 C23 1.516(7) . ?
C11 H11 0.9900 . ?
C11 H12 0.9900 . ?
C23 H25 0.9900 . ?
C23 H26 0.9900 . ?
P1 F5B 1.471(13) . ?
P1 F2B 1.478(8) . ?
P1 F3A 1.482(7) . ?
P1 F1A 1.504(12) . ?
P1 F5A 1.585(11) . ?
P1 F4A 1.635(18) . ?
P1 F6A 1.663(11) . ?
P1 F6B 1.672(13) . ?
P1 F1B 1.677(11) . ?
P1 F3B 1.678(10) . ?
P1 F4B 1.681(19) . ?
P1 F2A 1.721(10) . ?
P2 F11B 1.512(17) . ?
P2 F7B 1.523(16) . ?
P2 F9A 1.525(7) . ?
P2 F8A 1.556(9) . ?
P2 F11A 1.590(9) . ?
P2 F12A 1.601(11) . ?
P2 F9B 1.621(12) . ?
P2 F10B 1.628(14) . ?
P2 F7A 1.637(8) . ?
P2 F12B 1.64(2) . ?
P2 F10A 1.650(7) . ?
P2 F8B 1.728(18) . ?
N6 Fe2 2.033(4) . ?
N7 Fe2 1.911(4) . ?
N8 N9 1.309(5) . ?
N8 Fe2 1.957(4) . ?
N9 N10 1.346(5) . ?
N1 Fe1 1.998(4) . ?
N2 Fe1 1.990(4) . ?
N3 N4 1.336(5) . ?
N3 Fe1 1.931(4) . ?
N4 N5 1.331(5) . ?
Fe2 N7 1.911(4) 2_556 ?
Fe2 N8 1.957(4) 2_556 ?
Fe2 N6 2.034(4) 2_556 ?
Fe1 N3 1.931(4) 2_556 ?
Fe1 N2 1.990(5) 2_556 ?
Fe1 N1 1.998(4) 2_556 ?

loop_
 _geom_angle_atom_site_label_1
 _geom_angle_atom_site_label_2
 _geom_angle_atom_site_label_3
 _geom_angle
 _geom_angle_site_symmetry_1
 _geom_angle_site_symmetry_3
 _geom_angle_publ_flag
N6 C12 C13 124.7(5) . . ?
N6 C12 H13 117.7 . . ?
C13 C12 H13 117.7 . . ?
C14 C13 C12 120.1(5) . . ?
C14 C13 H14 119.9 . . ?
C12 C13 H14 119.9 . . ?
C15 C14 C13 116.1(6) . . ?
C15 C14 H15 121.9 . . ?
C13 C14 H15 121.9 . . ?
C14 C15 C16 122.4(5) . . ?
C14 C15 H16 118.8 . . ?
C16 C15 H16 118.8 . . ?
N6 C16 C15 122.0(5) . . ?
N6 C16 C17 117.5(5) . . ?
C15 C16 C17 120.5(5) . . ?
C16 C17 C18 114.4(4) . . ?
C16 C17 H17 108.7 . . ?
C18 C17 H17 108.7 . . ?
C16 C17 H18 108.7 . . ?
C18 C17 H18 108.7 . . ?
H17 C17 H18 107.6 . . ?
N7 C18 C17 112.6(4) . . ?
N7 C18 H19 109.1 . . ?
C17 C18 H19 109.1 . . ?
N7 C18 H20 109.1 . . ?
C17 C18 H20 109.1 . . ?
H19 C18 H20 107.8 . . ?
N7 C19 C20 116.3(4) . . ?
N7 C19 H21 121.9 . . ?
C20 C19 H21 121.9 . . ?
N8 C20 C21 109.0(4) . . ?
N8 C20 C19 111.2(4) . . ?
C21 C20 C19 139.6(4) . . ?
N10 C21 C20 104.7(4) . . ?
N10 C21 H22 127.7 . . ?
C20 C21 H22 127.7 . . ?
N10 C22 C23 109.5(4) . . ?
N10 C22 H23 109.8 . . ?
C23 C22 H23 109.8 . . ?
N10 C22 H24 109.8 . . ?
C23 C22 H24 109.8 . . ?
H23 C22 H24 108.2 . . ?
N1 C1 C2 122.8(7) . . ?
N1 C1 H1 118.6 . . ?
C2 C1 H1 118.6 . . ?
C1 C2 C3 117.9(7) . . ?
C1 C2 H2 121.0 . . ?
C3 C2 H2 121.0 . . ?
C4 C3 C2 120.3(6) . . ?
C4 C3 H3 119.8 . . ?
C2 C3 H3 119.8 . . ?
C3 C4 C5 119.8(7) . . ?
C3 C4 H4 120.1 . . ?
C5 C4 H4 120.1 . . ?
C4 C5 N1 120.7(6) . . ?
C4 C5 C6 117.9(6) . . ?
N1 C5 C6 121.5(5) . . ?
C7 C6 C5 112.3(5) . . ?
C7 C6 H5 109.1 . . ?
C5 C6 H5 109.1 . . ?
C7 C6 H6 109.1 . . ?
C5 C6 H6 109.1 . . ?
H5 C6 H6 107.9 . . ?
C6 C7 N2 109.6(5) . . ?
C6 C7 H7 109.7 . . ?
N2 C7 H7 109.7 . . ?
C6 C7 H8 109.7 . . ?
N2 C7 H8 109.7 . . ?
H7 C7 H8 108.2 . . ?
N2 C8 C9 114.6(5) . . ?
N2 C8 H9 122.7 . . ?
C9 C8 H9 122.7 . . ?
C10 C9 N3 105.5(4) . . ?
C10 C9 C8 138.1(5) . . ?
N3 C9 C8 115.9(5) . . ?
N5 C10 C9 106.0(4) . . ?
N5 C10 H10 127.0 . . ?
C9 C10 H10 127.0 . . ?
N5 C11 C23 109.6(4) . . ?
N5 C11 H11 109.8 . . ?
C23 C11 H11 109.8 . . ?
N5 C11 H12 109.8 . . ?
C23 C11 H12 109.8 . . ?
H11 C11 H12 108.2 . . ?
C11 C23 C22 110.5(4) . . ?
C11 C23 H25 109.5 . . ?
C22 C23 H25 109.5 . . ?
C11 C23 H26 109.5 . . ?
C22 C23 H26 109.5 . . ?
H25 C23 H26 108.1 . . ?
F5B P1 F2B 98.3(7) . . ?
F3A P1 F1A 95.8(6) . . ?
F3A P1 F5A 173.1(7) . . ?
F1A P1 F5A 91.1(5) . . ?
F3A P1 F4A 81.7(7) . . ?
F1A P1 F4A 93.5(9) . . ?
F5A P1 F4A 98.7(8) . . ?
F3A P1 F6A 96.0(6) . . ?
F1A P1 F6A 96.9(6) . . ?
F5A P1 F6A 82.4(7) . . ?
F4A P1 F6A 169.6(9) . . ?
F5B P1 F6B 99.6(8) . . ?
F2B P1 F6B 91.5(6) . . ?
F5B P1 F1B 92.8(7) . . ?
F2B P1 F1B 168.8(6) . . ?
F6B P1 F1B 85.3(7) . . ?
F5B P1 F3B 172.7(6) . . ?
F2B P1 F3B 89.0(5) . . ?
F6B P1 F3B 80.4(7) . . ?
F1B P1 F3B 80.0(6) . . ?
F5B P1 F4B 84.6(9) . . ?
F2B P1 F4B 100.5(8) . . ?
F6B P1 F4B 166.6(10) . . ?
F1B P1 F4B 81.9(8) . . ?
F3B P1 F4B 93.9(8) . . ?
F3A P1 F2A 88.5(5) . . ?
F1A P1 F2A 175.1(5) . . ?
F5A P1 F2A 84.7(5) . . ?
F4A P1 F2A 84.8(9) . . ?
F6A P1 F2A 85.0(5) . . ?
F11B P2 F7B 101.1(11) . . ?
F9A P2 F8A 93.4(5) . . ?
F9A P2 F11A 173.9(7) . . ?
F8A P2 F11A 92.6(7) . . ?
F9A P2 F12A 93.7(5) . . ?
F8A P2 F12A 98.1(7) . . ?
F11A P2 F12A 86.6(5) . . ?
F11B P2 F9B 167.2(11) . . ?
F7B P2 F9B 91.4(8) . . ?
F11B P2 F10B 93.3(8) . . ?
F7B P2 F10B 94.2(9) . . ?
F9B P2 F10B 87.9(7) . . ?
F9A P2 F7A 89.7(4) . . ?
F8A P2 F7A 175.8(5) . . ?
F11A P2 F7A 84.2(6) . . ?
F12A P2 F7A 84.4(6) . . ?
F11B P2 F12B 89.4(9) . . ?
F7B P2 F12B 100.4(13) . . ?
F9B P2 F12B 86.1(8) . . ?
F10B P2 F12B 164.3(12) . . ?
F9A P2 F10A 88.1(5) . . ?
F8A P2 F10A 90.0(5) . . ?
F11A P2 F10A 90.7(4) . . ?
F12A P2 F10A 171.5(6) . . ?
F7A P2 F10A 87.3(4) . . ?
F11B P2 F8B 85.8(12) . . ?
F7B P2 F8B 172.7(10) . . ?
F9B P2 F8B 81.5(9) . . ?
F10B P2 F8B 87.6(8) . . ?
F12B P2 F8B 77.1(11) . . ?
C12 N6 C16 114.6(5) . . ?
C12 N6 Fe2 119.4(3) . . ?
C16 N6 Fe2 125.6(4) . . ?
C19 N7 C18 120.7(4) . . ?
C19 N7 Fe2 116.4(3) . . ?
C18 N7 Fe2 121.8(3) . . ?
N9 N8 C20 107.0(4) . . ?
N9 N8 Fe2 135.6(3) . . ?
C20 N8 Fe2 115.1(3) . . ?
N8 N9 N10 108.6(4) . . ?
C21 N10 N9 110.8(4) . . ?
C21 N10 C22 130.6(4) . . ?
N9 N10 C22 118.2(4) . . ?
C1 N1 C5 118.5(5) . . ?
C1 N1 Fe1 116.8(4) . . ?
C5 N1 Fe1 124.3(4) . . ?
C8 N2 C7 117.4(5) . . ?
C8 N2 Fe1 114.8(4) . . ?
C7 N2 Fe1 127.0(4) . . ?
N4 N3 C9 111.3(4) . . ?
N4 N3 Fe1 135.9(3) . . ?
C9 N3 Fe1 111.8(3) . . ?
N5 N4 N3 105.5(4) . . ?
N4 N5 C10 111.8(4) . . ?
N4 N5 C11 117.5(4) . . ?
C10 N5 C11 130.2(4) . . ?
N7 Fe2 N7 167.0(3) 2_556 . ?
N7 Fe2 N8 90.38(16) 2_556 . ?
N7 Fe2 N8 80.17(17) . . ?
N7 Fe2 N8 80.17(17) 2_556 2_556 ?
N7 Fe2 N8 90.38(16) . 2_556 ?
N8 Fe2 N8 87.3(3) . 2_556 ?
N7 Fe2 N6 95.50(16) 2_556 . ?
N7 Fe2 N6 93.38(17) . . ?
N8 Fe2 N6 172.89(15) . . ?
N8 Fe2 N6 89.72(17) 2_556 . ?
N7 Fe2 N6 93.38(17) 2_556 2_556 ?
N7 Fe2 N6 95.50(16) . 2_556 ?
N8 Fe2 N6 89.72(17) . 2_556 ?
N8 Fe2 N6 172.89(15) 2_556 2_556 ?
N6 Fe2 N6 93.9(2) . 2_556 ?
N3 Fe1 N3 84.6(2) 2_556 . ?
N3 Fe1 N2 89.86(17) 2_556 . ?
N3 Fe1 N2 82.65(18) . . ?
N3 Fe1 N2 82.65(18) 2_556 2_556 ?
N3 Fe1 N2 89.85(17) . 2_556 ?
N2 Fe1 N2 169.9(3) . 2_556 ?
N3 Fe1 N1 171.26(19) 2_556 2_556 ?
N3 Fe1 N1 92.58(16) . 2_556 ?
N2 Fe1 N1 98.00(19) . 2_556 ?
N2 Fe1 N1 89.1(2) 2_556 2_556 ?
N3 Fe1 N1 92.58(16) 2_556 . ?
N3 Fe1 N1 171.26(19) . . ?
N2 Fe1 N1 89.1(2) . . ?
N2 Fe1 N1 98.00(19) 2_556 . ?
N1 Fe1 N1 91.4(2) 2_556 . ?

loop_
 _geom_torsion_atom_site_label_1
 _geom_torsion_atom_site_label_2
 _geom_torsion_atom_site_label_3
 _geom_torsion_atom_site_label_4
 _geom_torsion
 _geom_torsion_site_symmetry_1
 _geom_torsion_site_symmetry_2
 _geom_torsion_site_symmetry_3
 _geom_torsion_site_symmetry_4
 _geom_torsion_publ_flag
N6 C12 C13 C14 1.2(9) . . . . ?
C12 C13 C14 C15 0.5(9) . . . . ?
C13 C14 C15 C16 -0.9(9) . . . . ?
C14 C15 C16 N6 -0.3(9) . . . . ?
C14 C15 C16 C17 178.8(5) . . . . ?
N6 C16 C17 C18 42.0(6) . . . . ?
C15 C16 C17 C18 -137.1(5) . . . . ?
C16 C17 C18 N7 -69.6(6) . . . . ?
N7 C19 C20 N8 4.1(7) . . . . ?
N7 C19 C20 C21 -169.8(7) . . . . ?
N8 C20 C21 N10 -0.6(6) . . . . ?
C19 C20 C21 N10 173.4(7) . . . . ?
N1 C1 C2 C3 -1.0(11) . . . . ?
C1 C2 C3 C4 2.1(11) . . . . ?
C2 C3 C4 C5 -0.6(10) . . . . ?
C3 C4 C5 N1 -1.9(9) . . . . ?
C3 C4 C5 C6 176.2(6) . . . . ?
C4 C5 C6 C7 -135.1(5) . . . . ?
N1 C5 C6 C7 43.0(7) . . . . ?
C5 C6 C7 N2 -67.2(6) . . . . ?
N2 C8 C9 C10 -170.1(5) . . . . ?
N2 C8 C9 N3 0.2(7) . . . . ?
N3 C9 C10 N5 0.4(5) . . . . ?
C8 C9 C10 N5 171.3(5) . . . . ?
N5 C11 C23 C22 174.0(4) . . . . ?
N10 C22 C23 C11 171.5(4) . . . . ?
C13 C12 N6 C16 -2.4(8) . . . . ?
C13 C12 N6 Fe2 171.1(4) . . . . ?
C15 C16 N6 C12 1.9(7) . . . . ?
C17 C16 N6 C12 -177.2(4) . . . . ?
C15 C16 N6 Fe2 -171.1(4) . . . . ?
C17 C16 N6 Fe2 9.7(6) . . . . ?
C20 C19 N7 C18 171.7(4) . . . . ?
C20 C19 N7 Fe2 3.4(6) . . . . ?
C17 C18 N7 C19 -127.4(5) . . . . ?
C17 C18 N7 Fe2 40.2(5) . . . . ?
C21 C20 N8 N9 0.9(6) . . . . ?
C19 C20 N8 N9 -174.9(4) . . . . ?
C21 C20 N8 Fe2 166.3(4) . . . . ?
C19 C20 N8 Fe2 -9.5(6) . . . . ?
C20 N8 N9 N10 -0.9(6) . . . . ?
Fe2 N8 N9 N10 -161.8(4) . . . . ?
C20 C21 N10 N9 0.1(6) . . . . ?
C20 C21 N10 C22 -172.0(5) . . . . ?
N8 N9 N10 C21 0.5(6) . . . . ?
N8 N9 N10 C22 173.7(4) . . . . ?
C23 C22 N10 C21 75.1(7) . . . . ?
C23 C22 N10 N9 -96.5(5) . . . . ?
C2 C1 N1 C5 -1.4(9) . . . . ?
C2 C1 N1 Fe1 171.6(5) . . . . ?
C4 C5 N1 C1 2.9(8) . . . . ?
C6 C5 N1 C1 -175.1(5) . . . . ?
C4 C5 N1 Fe1 -169.6(4) . . . . ?
C6 C5 N1 Fe1 12.4(7) . . . . ?
C9 C8 N2 C7 173.6(4) . . . . ?
C9 C8 N2 Fe1 2.9(6) . . . . ?
C6 C7 N2 C8 -128.4(6) . . . . ?
C6 C7 N2 Fe1 41.0(7) . . . . ?
C10 C9 N3 N4 -0.2(5) . . . . ?
C8 C9 N3 N4 -173.5(4) . . . . ?
C10 C9 N3 Fe1 170.1(3) . . . . ?
C8 C9 N3 Fe1 -3.2(5) . . . . ?
C9 N3 N4 N5 -0.1(5) . . . . ?
Fe1 N3 N4 N5 -167.1(3) . . . . ?
N3 N4 N5 C10 0.4(5) . . . . ?
N3 N4 N5 C11 172.8(4) . . . . ?
C9 C10 N5 N4 -0.5(5) . . . . ?
C9 C10 N5 C11 -171.7(4) . . . . ?
C23 C11 N5 N4 -87.4(5) . . . . ?
C23 C11 N5 C10 83.4(6) . . . . ?

_refine_diff_density_max    0.462
_refine_diff_density_min   -0.627
_refine_diff_density_rms    0.086

_shelxl_version_number 2014/6

_shelx_res_file
;
TITL _HH150907-1(120K)
REM  Yadorkari-X generated
CELL 0.71070 19.0493 19.0556 20.6002 90.0000 115.8319 90.0000
ZERR 4.0 0.0058 0.0054 0.0088 0.0000 0.0033 0.0000
LATT 7
SYMM -X, +Y, 1/2-Z

REM  SPGR C2/c monoclinic
SFAC C H N F P Fe O
UNIT 196 238 86 96 16 8 6
SIZE 0.20 0.14 0.10
TEMP -152.8
L.S. 50
FMAP 2
PLAN -100
ACTA
CONF
LIST 4
BOND $H
MERG 2
OMIT -2.000000 55.000000

SADI 0.001 P1 F1 P1 F2 P1 F3 P1 F4 P1 F5 P1 F6
SADI 0.001 F1 F3 F1 F4 F1 F5 F1 F6 F2 F3 F2 F4 F2 F5
SADI 0.001 F1 F3 F2 F6 F3 F4 F3 F6 F4 F5 F5 F6
SADI 0.001 P2 F7 P2 F8 P2 F9 P2 F10 P2 F11 P2 F12
SADI 0.001 F7 F9 F7 F10 F7 F11 F7 F12 F8 F9 F8 F10 F8 F11
SADI 0.001 F7 F9 F8 F12 F9 F10 F9 F12 F10 F11 F11 F12
RIGU 0.004 0.004 $F $P $F
ABIN

WGHT    0.079100   27.413300
FVAR       0.73580   0.51826   0.63532
C12   1    0.110030    0.028623    0.790655    11.00000    0.06294    0.04238 =
         0.04497    0.00203    0.02843    0.00619
AFIX  43
H13   2    0.093305    0.027948    0.739955    11.00000   -1.20000
AFIX   0
C13   1    0.169739   -0.017208    0.832549    11.00000    0.07123    0.05021 =
         0.05486    0.01045    0.03513    0.00791
AFIX  43
H14   2    0.192849   -0.046959    0.810248    11.00000   -1.20000
AFIX   0
C14   1    0.194964   -0.019373    0.905382    11.00000    0.05937    0.06551 =
         0.05337    0.01604    0.02236    0.00132
AFIX  43
H15   2    0.235763   -0.049806    0.935277    11.00000   -1.20000
AFIX   0
C15   1    0.158926    0.023884    0.932420    11.00000    0.05741    0.08069 =
         0.04403    0.00583    0.01960   -0.01520
AFIX  43
H16   2    0.174267    0.023518    0.982913    11.00000   -1.20000
AFIX   0
C16   1    0.099131    0.069877    0.888714    11.00000    0.05879    0.05199 =
         0.03506    0.00070    0.02350   -0.01176
C17   1    0.059843    0.115772    0.920833    11.00000    0.07648    0.05257 =
         0.04292   -0.00786    0.03308   -0.02045
AFIX  23
H17   2    0.081656    0.163698    0.925801    11.00000   -1.20000
H18   2    0.071960    0.098400    0.969870    11.00000   -1.20000
AFIX   0
C18   1   -0.030320    0.119964    0.876762    11.00000    0.07011    0.04842 =
         0.04471   -0.00353    0.04108   -0.00949
AFIX  23
H19   2   -0.051889    0.071800    0.866530    11.00000   -1.20000
H20   2   -0.052709    0.143802    0.906160    11.00000   -1.20000
AFIX   0
C19   1   -0.103165    0.209524    0.792262    11.00000    0.05533    0.04737 =
         0.05065   -0.01322    0.03634   -0.01082
AFIX  43
H21   2   -0.130286    0.220486    0.820248    11.00000   -1.20000
AFIX   0
C20   1   -0.114141    0.248792    0.729906    11.00000    0.05483    0.04062 =
         0.06033   -0.00846    0.04089   -0.00122
C21   1   -0.149215    0.310010    0.695136    11.00000    0.05871    0.04310 =
         0.06918   -0.00297    0.04208    0.00584
AFIX  43
H22   2   -0.181688    0.340585    0.706471    11.00000   -1.20000
AFIX   0
C22   1   -0.138439    0.374290    0.593189    11.00000    0.06341    0.03890 =
         0.05175    0.00493    0.02347    0.00268
AFIX  23
H23   2   -0.192784    0.391636    0.573767    11.00000   -1.20000
H24   2   -0.128679    0.357829    0.552270    11.00000   -1.20000
AFIX   0
C1    1   -0.026573    0.835452    0.821628    11.00000    0.09294    0.04837 =
         0.05039   -0.00666    0.02298    0.00191
AFIX  43
H1    2   -0.074489    0.835102    0.779168    11.00000   -1.20000
AFIX   0
C2    1   -0.017441    0.882456    0.874950    11.00000    0.12134    0.05218 =
         0.06625   -0.01388    0.03966   -0.00004
AFIX  43
H2    2   -0.057653    0.914696    0.869568    11.00000   -1.20000
AFIX   0
C3    1    0.054268    0.881534    0.938801    11.00000    0.14847    0.06157 =
         0.05288   -0.01974    0.04473   -0.04077
AFIX  43
H3    2    0.061633    0.912481    0.977400    11.00000   -1.20000
AFIX   0
C4    1    0.111962    0.836768    0.944731    11.00000    0.10493    0.05596 =
         0.04399   -0.00803    0.01936   -0.03570
AFIX  43
H4    2    0.159896    0.836617    0.987174    11.00000   -1.20000
AFIX   0
C5    1    0.100907    0.791484    0.889042    11.00000    0.07140    0.04773 =
         0.03899    0.00286    0.01105   -0.02281
C6    1    0.169051    0.745501    0.896137    11.00000    0.05890    0.05682 =
         0.04524    0.00594    0.00647   -0.01724
AFIX  23
H5    2    0.217371    0.763325    0.936107    11.00000   -1.20000
H6    2    0.160199    0.697120    0.908457    11.00000   -1.20000
AFIX   0
C7    1    0.179586    0.743927    0.829286    11.00000    0.05597    0.06731 =
         0.04876    0.00224    0.00843   -0.02240
AFIX  23
H7    2    0.228545    0.719014    0.838149    11.00000   -1.20000
H8    2    0.183385    0.792445    0.813926    11.00000   -1.20000
AFIX   0
C8    1    0.127189    0.657581    0.737729    11.00000    0.04436    0.06126 =
         0.05450    0.01294    0.02047   -0.00297
AFIX  43
H9    2    0.178748    0.646608    0.745010    11.00000   -1.20000
AFIX   0
C9    1    0.059450    0.619230    0.687693    11.00000    0.03797    0.05249 =
         0.04489    0.00942    0.02162    0.00377
C10   1    0.043731    0.559208    0.646863    11.00000    0.05147    0.05074 =
         0.04672    0.00827    0.03037    0.00953
AFIX  43
H10   2    0.080165    0.530562    0.639072    11.00000   -1.20000
AFIX   0
C11   1   -0.083350    0.489495    0.579959    11.00000    0.05923    0.03975 =
         0.04202   -0.00037    0.02490    0.00668
AFIX  23
H11   2   -0.062995    0.469968    0.546974    11.00000   -1.20000
H12   2   -0.137633    0.505265    0.550639    11.00000   -1.20000
AFIX   0
C23   1   -0.082011    0.433467    0.632704    11.00000    0.04594    0.04681 =
         0.04412    0.00325    0.02092    0.00561
AFIX  23
H25   2   -0.096842    0.454452    0.668923    11.00000   -1.20000
H26   2   -0.028557    0.414343    0.658391    11.00000   -1.20000
AFIX   0
P1    5    0.215728    0.003919    0.646167    11.00000    0.04060    0.09568 =
         0.04383   -0.01310    0.01938    0.00888
P2    5    0.102483    0.352633    0.567650    11.00000    0.06141    0.06186 =
         0.05698    0.01700    0.03705    0.01353
PART 1
F1A   4    0.222444   -0.072970    0.633438    21.00000    0.06235    0.07533 =
         0.07602    0.00789    0.03231    0.02082
F2A   4    0.207237    0.093178    0.653448    21.00000    0.04970    0.08063 =
         0.08877   -0.03177    0.01771    0.00280
F3A   4    0.180881   -0.005839    0.697317    21.00000    0.07011    0.13278 =
         0.05389    0.00063    0.03618    0.01728
PART 2
F4B   4    0.127888    0.006016    0.574569   -21.00000    0.04030    0.05111 =
         0.03481   -0.00994    0.02388    0.00562
PART 1
F5A   4    0.253465    0.024120    0.593651    21.00000    0.05329    0.07924 =
         0.07436   -0.00896    0.03913    0.00158
PART 2
F6B   4    0.302832   -0.017688    0.711801   -21.00000    0.05006    0.10924 =
         0.05455   -0.00614    0.01459    0.01113
PART 1
F7A   4    0.120545    0.268324    0.572483    31.00000    0.06980    0.05683 =
         0.04817    0.00833    0.02995    0.00926
F8A   4    0.086191    0.432877    0.557913    31.00000    0.11639    0.06127 =
         0.09870    0.02237    0.07371    0.02739
F9A   4    0.037204    0.339262    0.590073    31.00000    0.08645    0.09508 =
         0.10768    0.03555    0.07410    0.02343
F10A  4    0.038429    0.339382    0.483354    31.00000    0.07805    0.10948 =
         0.05737    0.02679    0.02067    0.01064
F11A  4    0.171086    0.357713    0.543599    31.00000    0.06998    0.07923 =
         0.08664    0.00386    0.05457   -0.00055
F12A  4    0.169041    0.353981    0.648969    31.00000    0.10141    0.09111 =
         0.05881   -0.00642    0.03717   -0.00313
PART 0
N6    3    0.074670    0.073407    0.816721    11.00000    0.05965    0.03683 =
         0.04048   -0.00383    0.02798   -0.00927
N7    3   -0.053801    0.157626    0.808902    11.00000    0.05283    0.04371 =
         0.04308   -0.00566    0.02903   -0.01087
N8    3   -0.073281    0.220543    0.696279    11.00000    0.05708    0.03888 =
         0.05184    0.00093    0.03861   -0.00343
N9    3   -0.081517    0.262950    0.643427    11.00000    0.06013    0.03254 =
         0.05816    0.00536    0.03972    0.00908
N10   3   -0.127717    0.316660    0.642796    11.00000    0.05202    0.03683 =
         0.06357    0.00090    0.03333    0.00368
N1    3    0.029354    0.789771    0.826775    11.00000    0.07363    0.03737 =
         0.04681    0.00147    0.02728   -0.00181
N2    3    0.111998    0.707320    0.771254    11.00000    0.04686    0.04650 =
         0.04395    0.00652    0.01313   -0.01004
N3    3   -0.011854    0.641586    0.682914    11.00000    0.04019    0.04152 =
         0.03710    0.00536    0.01814    0.00018
N4    3   -0.069381    0.598622    0.641444    11.00000    0.04016    0.03825 =
         0.04326   -0.00303    0.02259    0.00189
N5    3   -0.035340    0.549019    0.619596    11.00000    0.05049    0.03941 =
         0.04292    0.00188    0.02641    0.00379
FE2   6    0.000000    0.146244    0.750000    10.50000    0.05900    0.03533 =
         0.04454    0.00000    0.03474    0.00000
FE1   6    0.000000    0.716531    0.750000    10.50000    0.04773    0.03841 =
         0.03861    0.00000    0.01300    0.00000
PART 2
F10B  4    0.017643    0.374336    0.504160   -31.00000    0.08812    0.12563 =
         0.07420    0.02799    0.02661    0.02056
F9B   4    0.065479    0.361317    0.624702   -31.00000    0.08707    0.07926 =
         0.06684    0.00922    0.04974    0.01213
F7B   4    0.085110    0.274275    0.560515   -31.00000    0.10583    0.06383 =
         0.06785    0.01237    0.04182    0.00277
F8B   4    0.120393    0.441136    0.585630   -31.00000    0.08796    0.06717 =
         0.08643    0.01445    0.05423    0.02029
F11B  4    0.143141    0.361088    0.519360   -31.00000    0.10108    0.07774 =
         0.06300    0.01678    0.05518    0.01816
F12B  4    0.187751    0.353168    0.638247   -31.00000    0.07234    0.10008 =
         0.07462    0.01008    0.03547    0.02148
F2B   4    0.206181    0.060697    0.690540   -21.00000    0.05893    0.09453 =
         0.06340   -0.03308    0.02199    0.00184
F3B   4    0.187626   -0.054011    0.691544   -21.00000    0.10581    0.10293 =
         0.04414   -0.01077    0.03202   -0.02518
PART 1
F6A   4    0.306796    0.014987    0.708690    21.00000    0.04194    0.09434 =
         0.05809   -0.00523    0.00935    0.00602
PART 2
F5B   4    0.240893    0.047059    0.600913   -21.00000    0.06129    0.10759 =
         0.06936   -0.00451    0.03511   -0.01633
F1B   4    0.223316   -0.070876    0.606831   -21.00000    0.07998    0.09046 =
         0.04999   -0.01201    0.02211    0.03040
PART 1
F4A   4    0.123812    0.007670    0.588226    21.00000    0.03816    0.07207 =
         0.03869   -0.01926    0.01999    0.00985
PART 0

HKLF 4 1 1 0 0 0 -1 0 -1 0 -1

REM  _HH150907-1(120K)
REM R1 =  0.0879 for    5906 Fo > 4sig(Fo)  and  0.1054 for all    7550 data
REM    544 parameters refined using    252 restraints

END

WGHT      0.0777     27.7362

REM Highest difference peak  0.462,  deepest hole -0.627,  1-sigma level  0.086
Q1    1   0.0000  0.2954  0.7500  10.50000  0.05    0.46
Q2    1   0.0000  0.6368  0.7500  10.50000  0.05    0.44
Q3    1   0.1218  0.3605  0.6495  11.00000  0.05    0.39
Q4    1   0.0000  0.2392  0.7500  10.50000  0.05    0.38
Q5    1   0.0449  0.0966  0.7259  11.00000  0.05    0.37
Q6    1   0.2027  0.0120  1.0376  11.00000  0.05    0.37
Q7    1   0.1950  0.0702  0.5995  11.00000  0.05    0.36
Q8    1  -0.0159  0.3337  0.5297  11.00000  0.05    0.35
Q9    1   0.0778  0.3731  0.4977  11.00000  0.05    0.34
Q10   1   0.0000  0.5638  0.7500  10.50000  0.05    0.33
Q11   1   0.0809  0.7212  0.8191  11.00000  0.05    0.33
Q12   1   0.0656  0.7706  0.7685  11.00000  0.05    0.32
Q13   1   0.0000  0.0386  0.7500  10.50000  0.05    0.31
Q14   1   0.0238  0.4285  0.5066  11.00000  0.05    0.31
Q15   1   0.2004  0.6018  0.7967  11.00000  0.05    0.31
Q16   1   0.1196  0.5442  0.7923  11.00000  0.05    0.31
Q17   1  -0.0186  0.7705  0.7883  11.00000  0.05    0.30
Q18   1   0.0995  0.6468  0.8207  11.00000  0.05    0.30
Q19   1   0.0183  0.5077  0.6870  11.00000  0.05    0.29
Q20   1   0.0000  0.3508  0.7500  10.50000  0.05    0.29
Q21   1   0.0427  0.1663  0.8257  11.00000  0.05    0.29
Q22   1   0.1023 -0.0375  0.7475  11.00000  0.05    0.28
Q23   1   0.2883  0.3566  0.6086  11.00000  0.05    0.28
Q24   1   0.0000  0.4124  0.7500  10.50000  0.05    0.27
Q25   1   0.0846  0.1287  0.7679  11.00000  0.05    0.27
Q26   1   0.0276  0.1037  0.8077  11.00000  0.05    0.27
Q27   1   0.0218  0.2701  0.4937  11.00000  0.05    0.27
Q28   1   0.0910  0.1493  0.8143  11.00000  0.05    0.27
Q29   1   0.2240  0.0296  0.8793  11.00000  0.05    0.26
Q30   1  -0.0658  0.3505  0.5498  11.00000  0.05    0.26
Q31   1  -0.0872  0.1574  0.7386  11.00000  0.05    0.26
Q32   1  -0.0982  0.0137  0.8772  11.00000  0.05    0.26
Q33   1   0.1554  0.0261  0.7110  11.00000  0.05    0.26
Q34   1   0.2103  0.6484  0.9417  11.00000  0.05    0.26
Q35   1   0.3812 -0.0213  0.7746  11.00000  0.05    0.26
Q36   1   0.1597  0.4826  0.5636  11.00000  0.05    0.26
Q37   1  -0.0182  0.2309  0.8172  11.00000  0.05    0.25
Q38   1  -0.0016  0.7124  0.8227  11.00000  0.05    0.25
Q39   1   0.2029 -0.0704  0.6634  11.00000  0.05    0.25
Q40   1  -0.0632  0.1873  0.7541  11.00000  0.05    0.25
Q41   1  -0.0580  0.4102  0.5019  11.00000  0.05    0.25
Q42   1   0.0209  0.2060  0.8487  11.00000  0.05    0.24
Q43   1   0.0397  0.2395  0.9271  11.00000  0.05    0.24
Q44   1   0.8744  0.2469  0.4339  11.00000  0.05    0.24
Q45   1  -0.1022  0.5413  0.6588  11.00000  0.05    0.24
Q46   1  -0.0173  0.6713  0.6946  11.00000  0.05    0.24
Q47   1  -0.0385  0.2535  0.7826  11.00000  0.05    0.24
Q48   1   0.1387 -0.0321  0.9713  11.00000  0.05    0.24
Q49   1   0.1000  0.9232  1.0572  11.00000  0.05    0.23
Q50   1  -0.1400  0.5603  0.6642  11.00000  0.05    0.23
Q51   1   0.1244  0.7217  0.9539  11.00000  0.05    0.23
Q52   1   0.0635  0.1884  0.9518  11.00000  0.05    0.23
Q53   1   0.1039 -0.0696  0.5785  11.00000  0.05    0.23
Q54   1  -0.0208  0.2626  0.5874  11.00000  0.05    0.23
Q55   1   0.0212  0.3097  0.4003  11.00000  0.05    0.23
Q56   1   0.2262  0.7143  0.9518  11.00000  0.05    0.23
Q57   1   0.1350  0.1504  0.8432  11.00000  0.05    0.23
Q58   1   0.2165  0.3553  0.5896  11.00000  0.05    0.23
Q59   1  -0.1047  0.2279  0.6129  11.00000  0.05    0.23
Q60   1  -0.0038  0.2765  0.4337  11.00000  0.05    0.23
Q61   1   0.2970 -0.0107  0.8098  11.00000  0.05    0.23
Q62   1   0.3026  0.0182  0.6615  11.00000  0.05    0.22
Q63   1   0.0780  0.5025  0.5724  11.00000  0.05    0.22
Q64   1   0.2742  0.7574  0.9008  11.00000  0.05    0.22
Q65   1   0.2739  0.7787  0.8505  11.00000  0.05    0.22
Q66   1  -0.0029  0.2642  0.6613  11.00000  0.05    0.22
Q67   1   0.2014  0.4238  0.6395  11.00000  0.05    0.22
Q68   1   0.0843  0.7208  0.7506  11.00000  0.05    0.22
Q69   1   0.1661  0.8655  1.0392  11.00000  0.05    0.22
Q70   1   0.0732  0.4073  0.7422  11.00000  0.05    0.22
Q71   1  -0.1042  0.7884  0.7302  11.00000  0.05    0.22
Q72   1   0.2866 -0.0332  0.6520  11.00000  0.05    0.22
Q73   1   0.8204  0.3005  0.4092  11.00000  0.05    0.22
Q74   1   0.1809  0.0987  0.5699  11.00000  0.05    0.22
Q75   1   0.1806  0.3236  0.5997  11.00000  0.05    0.22
Q76   1  -0.0542  0.2693  0.8079  11.00000  0.05    0.22
Q77   1   0.1416  0.3904  0.7108  11.00000  0.05    0.21
Q78   1   0.0613  0.7712  0.8598  11.00000  0.05    0.21
Q79   1   0.2795 -0.0707  1.0085  11.00000  0.05    0.21
Q80   1   0.0940 -0.0373  0.9021  11.00000  0.05    0.21
Q81   1   0.0464  0.3231  0.6774  11.00000  0.05    0.21
Q82   1   0.2853 -0.0667  0.9101  11.00000  0.05    0.21
Q83   1   0.0029  0.0711  0.8279  11.00000  0.05    0.21
Q84   1  -0.1734  0.1353  0.7757  11.00000  0.05    0.21
Q85   1  -0.1670  0.4771  0.6324  11.00000  0.05    0.21
Q86   1  -0.0154  0.0297  0.8352  11.00000  0.05    0.21
Q87   1   0.1780  0.2964  0.6788  11.00000  0.05    0.21
Q88   1   0.1566  0.0642  1.0326  11.00000  0.05    0.21
Q89   1   0.1582 -0.1105  0.6112  11.00000  0.05    0.21
Q90   1   0.0000 -0.0124  0.7500  10.50000  0.05    0.21
Q91   1  -0.2173  0.4003  0.6338  11.00000  0.05    0.21
Q92   1   0.0811  0.7186  0.6987  11.00000  0.05    0.21
Q93   1   0.2182 -0.1340  0.7059  11.00000  0.05    0.21
Q94   1  -0.0776  0.7825  0.7899  11.00000  0.05    0.21
Q95   1  -0.1350  0.7932  0.7345  11.00000  0.05    0.21
Q96   1  -0.1171  0.8789  0.8418  11.00000  0.05    0.20
Q97   1   0.1585  0.8602  0.9196  11.00000  0.05    0.20
Q98   1  -0.1170  0.9278  0.8572  11.00000  0.05    0.20
Q99   1  -0.1228  0.8686  0.7141  11.00000  0.05    0.20
Q100  1   0.1572  0.4215  0.5083  11.00000  0.05    0.20
;
_shelx_res_checksum   40900

_shelx_hkl_file
;
   0   0  -3   16.89   18.00
   0   0   3   11.92   18.11
   0   0   3   -1.92   16.50
   0   0  -3   -1.65   20.01
   0   0   3    1.96   10.43
   0   0  -3   35.34   13.58
   0   0  -4111865.4 1142.78
   0   0   4110026.0 1123.93
   0   0   4110006.7 1082.67
   0   0   4111362.6 1094.69
   0   0  -4107700.2 1065.41
   0   0  -5   42.54   17.61
   0   0   5    6.28   18.06
   0   0   5  -16.40   21.25
   0   0  -5    4.66   18.93
   0   0   5  -44.51   24.74
   0   0  -5   -3.20   22.48
   0   0  -623234.80  353.24
   0   0   623882.70  359.79
   0   0   622848.80  299.15
   0   0  -624304.60  329.93
   0   0   622949.00  307.26
   0   0  -623817.20  319.57
   0   0  -7   -1.16   29.33
   0   0   7  172.53   51.77
   0   0   7   28.87   19.78
   0   0  -7    1.51   15.67
   0   0   7   17.48   15.81
   0   0  -7   -3.87   23.75
   0   0  -8 4147.90  235.59
   0   0   8 4728.88  242.00
   0   0   8 4346.86  204.05
   0   0  -8 4546.76  215.12
   0   0  -8 4556.10  246.42
   0   0  -9   36.12   24.74
   0   0   9   -2.91   17.75
   0   0  -9   17.57   18.02
   0   0  -9   40.46   25.96
   0   0 -10 2269.90  142.53
   0   0  10 2029.19  225.74
   0   0 -10 2252.75  148.38
   0   0 -10 2147.73   91.97
   0   0 -11   68.81   40.88
   0   0 -11   14.61   26.28
   0   0 -11  -13.50   23.36
   0   0 -12 6606.50  328.93
   0   0 -12 6345.55  240.33
   0   0 -13   97.92   52.16
   0   0 -13   39.89   30.69
   0   0 -14  166.98   60.04
   0   0 -15   71.94   39.31
   0   0 -16 8149.56  321.90
   0   0 -17  130.21   55.08
   0   0 -18 5401.03  401.57
   0   0 -19   32.79   50.06
   0   0 -20  990.84  217.66
   0   0 -21   10.03   27.91
   0   0 -22  337.78   75.67
   0   0 -23   10.85   27.79
   0   0 -24   51.63   35.41
   0   2   210544.50  280.28
   0  -2  -210570.50  244.40
   0  -2   210361.00  236.11
   0   2  -210175.60  231.41
   0  -2  -3128998.2 1294.04
   0   2  -3124834.3 1248.58
   0  -2   3124999.1 1248.67
   0  -2  -464933.30  724.05
   0   2   464904.00  725.38
   0  -2   465375.10  723.75
   0   2  -462432.90  688.34
   0   2   5   41.86   26.13
   0  -2  -5   78.20   37.89
   0   2  -5   96.59   30.41
   0  -2   5   74.30   41.29
   0  -2   5   61.73   23.97
   0   2   5   92.80   45.30
   0   2   6 3300.84  135.00
   0  -2  -6 3226.56  217.17
   0   2  -6 3421.82  129.88
   0  -2   6 3624.37  203.37
   0  -2  -6 3267.69  159.00
   0  -2   6 3474.22  118.40
   0   2   6 3278.23  109.08
   0  -2  -7 6519.06  307.71
   0   2  -7 6000.47  325.86
   0  -2   7 6414.36  327.71
   0  -2  -7 6272.73  294.34
   0  -2  -7 6228.40  284.04
   0  -2   7 6860.93  377.58
   0   2  -7 6511.05  316.79
   0   2   7 6560.57  297.66
   0  -2  -8  573.90  127.16
   0   2  -8  457.62  102.06
   0  -2  -8  426.11  186.19
   0  -2   8  572.87  133.01
   0  -2  -8  677.23  165.67
   0  -2   8  545.28   96.95
   0   2  -8  627.41  150.71
   0   2   8  451.50  120.86
   0  -2  -9 1500.84  305.75
   0   2  -9 1190.33  292.44
   0  -2   9 1632.27  126.82
   0  -2  -9 1594.34  155.00
   0  -2   9 1352.49   77.51
   0   2  -9 1343.61  118.95
   0   2   9 1257.51  105.89
   0  -2 -10 6663.63  321.47
   0  -2  10 7358.57  209.69
   0  -2  10 7021.19  342.14
   0  -2 -10 6768.18  314.31
   0   2  10 6237.91  285.93
   0   2 -10 6821.90  371.90
   0  -2 -11  170.92   77.72
   0  -2  11  356.75   72.66
   0  -2  11  155.15   30.45
   0  -2 -11  211.41   35.71
   0   2  11  178.50   56.86
   0   2 -11  207.05   53.26
   0  -2 -12 2745.63  489.78
   0  -2  12 2754.49  244.17
   0  -2  12 2035.89  280.08
   0  -2 -12 2388.86  184.69
   0   2  12 1981.11  144.06
   0   2 -12 2481.06  110.45
   0  -2 -13 7976.55  429.26
   0  -2  13 8911.15  442.89
   0  -2  13 6864.81  510.94
   0  -2 -13 7995.24  403.95
   0   2  13 6917.03  322.05
   0   2 -13 7457.80  374.87
   0  -2 -14 5503.94  488.29
   0  -2 -14 5721.63  318.17
   0   2 -14 5672.03  357.02
   0  -2 -15 1839.99  138.15
   0  -2 -15 1861.63  191.09
   0   2 -15 1916.75  223.44
   0  -2 -16 2384.86  438.34
   0   2 -16 2477.76  412.10
   0  -2 -16 2521.82  243.19
   0   2 -16 2220.57  197.87
   0   2 -17 1431.77  368.56
   0  -2 -17 1160.82  224.64
   0   2 -17  499.35  236.41
   0  -2 -18  251.91   82.09
   0   2 -18  100.94   47.70
   0   2 -18  108.21   36.41
   0   2 -19 1135.40  185.88
   0  -2 -19 1011.50  319.58
   0  -2 -20   79.07   32.94
   0   2 -20   48.82   33.32
   0  -2 -21   18.83   47.24
   0   2 -21   20.54   23.64
   0  -2 -22   51.09   35.45
   0   2 -22   99.11   47.78
   0   2 -23   39.30   30.58
   0  -2 -23   93.43   73.66
   0   4   0 3119.36  107.76
   0  -4   0 3366.11  121.27
   0  -4   0 3230.71   79.80
   0   4   0 3308.99   80.13
   0   4   1 1128.67  176.54
   0  -4  -1 1264.11  209.40
   0   4  -1 1135.43   81.99
   0  -4   1 1162.39   65.98
   0  -4   1 1002.60   60.44
   0   4   214659.50  243.50
   0  -4  -214448.80  243.51
   0   4  -214302.70  232.92
   0  -4   214775.90  249.77
   0  -4  -356417.10  664.63
   0   4   356288.80  670.54
   0   4  -356707.40  650.60
   0  -4   355040.30  640.60
   0   4   4  504.83  107.63
   0  -4  -4  566.37  164.52
   0  -4   4  571.53  170.84
   0   4  -4  495.24  154.77
   0   4   529151.60  437.64
   0  -4  -530191.80  470.84
   0   4  -529381.10  412.12
   0  -4   530178.70  516.92
   0   4   6 2743.05  171.03
   0  -4  -6 2993.16  184.37
   0   4  -6 2565.61  143.66
   0  -4   6 2781.59  158.83
   0   4   7 6993.94  327.99
   0  -4  -7 8179.99  453.15
   0   4  -7 6864.51  355.76
   0  -4   7 7749.42  415.63
   0  -4  -8 3556.49  200.31
   0   4  -8 3354.52  189.99
   0  -4   8 3781.97  202.89
   0  -4   8 3363.48  227.31
   0  -4  -9 2266.06  134.22
   0  -4   9 2362.43  136.81
   0  -4   9 2177.05  107.74
   0   4   9 1926.45  135.96
   0  -4 -10 1118.22  102.74
   0  -4  10 1411.12  125.70
   0  -4 -10 1035.99  110.77
   0  -4  10  906.12  212.56
   0   4 -10 1139.28  264.25
   0   4  10 1075.33   70.04
   0  -4 -11   67.95   31.08
   0  -4  11   23.02   37.94
   0  -4 -11    3.13   22.83
   0  -4  11   20.54   28.34
   0   4 -11   31.61   17.15
   0   4  11    7.73   14.20
   0  -4 -12   79.12   68.95
   0  -4  12   51.26   42.63
   0  -4 -12   55.45   26.48
   0   4 -12   59.69   38.10
   0   4  12   15.66   21.84
   0  -4 -13 3560.81  244.71
   0  -4 -13 3599.50  252.24
   0   4 -13 3392.71  301.77
   0   4  13 2808.45  219.93
   0  -4 -14 1662.10  316.54
   0  -4  14 1478.67  296.52
   0  -4 -14 1381.54   98.24
   0   4  14  784.69  196.12
   0   4 -14 1400.53  294.43
   0  -4 -15  602.06  110.45
   0  -4  15  439.56  104.84
   0  -4 -15  411.09  102.98
   0   4 -15  364.17  131.11
   0  -4 -16 5543.69  318.29
   0  -4  16 4616.47  512.86
   0  -4 -16 4779.49  169.79
   0   4 -16 4459.14  253.72
   0  -4 -17  407.83   89.25
   0  -4  17  557.83  250.33
   0  -4 -17  318.49   85.45
   0   4 -17  378.00  108.10
   0  -4 -18   31.55   25.46
   0  -4  18  -24.62   30.26
   0  -4 -18   24.95   15.95
   0   4 -18   31.73   37.52
   0   4 -19  787.24  216.61
   0  -4 -19 1101.23  190.24
   0   4 -20  190.88   84.33
   0  -4 -20  135.49   63.31
   0   4 -21   63.54   37.97
   0  -4 -21   37.80   28.13
   0   4 -22   89.26   45.86
   0  -4 -22   42.08   51.18
   0   4 -23   52.08   43.20
   0  -4 -23   87.33   62.05
   0   6   019938.90  323.11
   0  -6   020787.00  216.69
   0   6   020246.40  215.37
   0   6   1 1532.77   84.46
   0  -6  -1 1567.93  144.76
   0   6  -1 1722.62  163.54
   0  -6   1 1643.82   87.42
   0   6   2   96.13   44.62
   0  -6  -2  174.67   62.00
   0  -6   2  102.47   46.71
   0   6  -2  119.42   26.83
   0   6  -2  174.40   32.36
   0  -6   2  147.93   23.07
   0   6   3  614.61  123.71
   0  -6  -3  583.11  130.11
   0   6  -3  514.57  136.59
   0  -6   3  666.76  187.22
   0  -6   3  482.76  107.49
   0   6   4 9060.74  302.93
   0  -6  -4 9056.20  307.56
   0   6  -4 8864.09  316.88
   0  -6   4 9697.66  320.10
   0   6   511850.50  479.00
   0  -6  -513086.10  474.97
   0   6  -511897.40  372.98
   0  -6   512831.10  406.66
   0  -6  -6 2411.83  161.32
   0   6  -6 1956.81  103.67
   0  -6   6 2410.39  162.31
   0  -6  -7 3362.99  360.91
   0  -6   7 3927.49  247.19
   0  -6  -8 3215.59  449.53
   0  -6   8 3032.68  138.78
   0  -6  -9  386.47  116.14
   0  -6   9  362.68   90.04
   0  -6 -10   76.79   33.29
   0  -6  10   32.30   46.63
   0  -6 -11  156.30   68.26
   0  -6  11  113.97   36.91
   0   6  11   92.18   36.65
   0  -6 -12 2236.76  464.08
   0  -6  12 2156.38  296.74
   0  -6 -12 2237.42  186.61
   0   6 -12 2391.56  280.51
   0  -6 -13  964.50  202.79
   0  -6 -13  830.59  212.96
   0   6 -13  784.40  201.32
   0  -6 -14 1232.08  133.09
   0  -6  14 1079.02  291.29
   0  -6 -14  903.93  218.68
   0   6 -14 1013.92  272.87
   0  -6 -15  137.33   85.23
   0  -6  15  217.15   55.13
   0  -6 -15   67.70   29.13
   0   6 -15  117.41   44.56
   0  -6 -16   91.93   53.84
   0  -6  16   27.69   55.58
   0  -6 -16   24.50   15.56
   0   6 -16   37.08   23.46
   0  -6 -17   30.55   40.13
   0  -6  17   88.16   68.73
   0  -6 -17   18.39   19.23
   0  -6 -18  904.79  202.76
   0  -6  18  590.92  169.11
   0  -6 -18  476.27  170.00
   0  -6 -19   52.05   27.62
   0  -6  19   40.19   25.40
   0  -6 -20  207.94   46.92
   0  -6  20  283.30   71.89
   0  -6 -21  255.59   97.88
   0   6 -22   74.94   28.64
   0  -6 -22   64.20   41.08
   0   6 -23   40.81   28.40
   0  -6 -23   61.48   46.71
   0  -8   032113.20  904.47
   0   8  -1 1809.52  130.18
   0  -8  -1 2151.65  290.72
   0  -8   1 2077.20  126.02
   0  -8  -2 3533.39  212.55
   0  -8   2 3297.81  191.45
   0   8  -2 2895.91  165.53
   0  -8   2 3267.69  143.85
   0  -8  -3  140.96   37.25
   0  -8   3  115.08   69.00
   0   8  -3  132.19   18.95
   0  -8   3  144.32   32.02
   0  -8  -4  279.66   70.58
   0  -8   4  117.88   71.42
   0   8  -4  235.16   51.88
   0  -8   4  216.49   63.43
   0  -8  -5   69.84   54.83
   0  -8   5  105.17   28.76
   0  -8   5  106.92   21.64
   0  -8  -6 5233.38  343.23
   0  -8   6 5257.23  337.24
   0  -8   6 4929.01  237.10
   0  -8  -7 2065.13  154.86
   0  -8   7 1901.50  125.52
   0  -8  -8  748.05  121.29
   0  -8   8  620.73  162.30
   0  -8  -9   -6.63   46.87
   0  -8   9   70.58   48.17
   0  -8 -10 1627.04  235.40
   0  -8  10 1440.08  405.25
   0  -8 -11 1418.63  278.70
   0  -8 -12 3349.99  467.97
   0  -8  12 3156.41  170.44
   0  -8 -13   39.44   39.13
   0  -8  13   88.02   41.99
   0  -8 -14 2294.05  554.62
   0  -8  14 2228.57  346.58
   0  -8 -14 2194.68  156.67
   0  -8 -15   45.43   43.45
   0  -8  15   38.40   52.82
   0  -8 -15   17.40   20.12
   0   8 -15   40.77   24.80
   0  -8 -16   91.97   66.62
   0  -8  16   71.62   47.63
   0  -8 -16   91.72   55.25
   0   8 -16   18.42   26.44
   0  -8 -17   51.94   55.98
   0  -8  17   71.21   40.74
   0  -8 -17   41.41   22.20
   0   8 -17  137.48   27.60
   0  -8 -18  195.24   41.22
   0  -8  18  342.19   41.82
   0   8 -18  256.14   91.79
   0  -8 -19   45.54   25.45
   0  -8  19   22.65   22.28
   0   8 -19   58.84   34.71
   0  -8  20   21.88   26.11
   0  -8 -21   46.74   46.05
   0  -8  21   15.00   29.14
   0  -8 -22   68.18   42.82
   0  -8  22   67.98   61.61
   0 -10   013790.30  405.21
   0 -10   1 7015.64  380.48
   0 -10  -1 7209.80  357.58
   0  10   1 6885.12  277.66
   0 -10  -2 1215.66  247.86
   0 -10   2 1043.09  254.49
   0 -10  -3 6788.12  348.56
   0 -10   3 6526.73  328.42
   0 -10   3 6425.41  264.05
   0 -10  -4 1566.54  186.99
   0 -10   4 1725.61  156.48
   0  10  -4 1312.12  133.07
   0 -10   4 1395.72   87.34
   0 -10  -5 2025.58  204.37
   0 -10   5 2080.41  143.31
   0  10  -5 1809.17  140.07
   0 -10   5 1875.63   94.67
   0 -10  -6 2060.69  151.91
   0 -10   6 1802.52  138.57
   0  10  -6 1902.53  128.60
   0 -10   6 1618.42  135.77
   0 -10  -7 1668.47  410.04
   0 -10   7 1555.62  117.27
   0 -10   7 1289.22  145.67
   0 -10  -8   23.49   56.50
   0 -10   8   84.52   55.41
   0 -10  -9  664.16  171.63
   0 -10 -10  186.63   82.97
   0 -10  10  409.52   89.05
   0 -10 -11  301.32  123.26
   0 -10  11  196.93   67.90
   0 -10 -12  195.63   77.09
   0 -10  12  153.54   75.57
   0 -10 -13  385.43   93.71
   0 -10  13  556.89  103.07
   0 -10 -14 1229.21  191.45
   0 -10  14 1144.43  253.96
   0 -10 -15  494.89   91.87
   0 -10  15  403.83  122.71
   0 -10 -16 2263.57  419.70
   0 -10  16 1887.71  561.22
   0 -10 -16 1707.98  316.49
   0  10 -16 1512.28  447.64
   0 -10 -17  641.73  157.15
   0 -10  17  579.96  215.52
   0 -10 -17  384.79  125.80
   0  10 -17  588.35  198.35
   0 -10 -18   43.78   60.06
   0 -10  18   88.05   62.49
   0  10 -18   67.73   24.09
   0 -10 -19  391.88  121.40
   0 -10  19  286.50  131.80
   0  10 -19  174.39   82.27
   0 -10 -20   61.89   47.83
   0 -10  20   58.26   13.02
   0 -10 -21   30.51   20.73
   0 -10  21   12.74   40.46
   0 -10 -22   70.08   48.22
   0 -10  22   14.27   14.63
   0 -12   0  370.21  120.74
   0 -12  -4 1640.16  341.74
   0 -12   4 1422.60   56.13
   0 -12  -5   36.37   27.40
   0  12  -5   13.69   20.38
   0 -12   5    7.64    8.69
   0 -12  -6 2355.21  320.61
   0 -12   6 1958.47  149.88
   0  12  -6 2000.28  183.09
   0 -12   6 1890.78  178.66
   0 -12  -7  902.20  201.16
   0 -12   7  922.24  422.52
   0  12  -7  717.75  150.02
   0 -12   7  594.94  151.20
   0 -12  -8 1013.07  182.77
   0 -12   8  747.39  162.99
   0  12  -8  840.55  162.83
   0 -12  -9  737.66  159.93
   0 -12   9  581.64  158.09
   0  12  -9  577.60  159.25
   0 -12 -10 1015.88  228.43
   0 -12  10 1033.03  288.75
   0 -12 -11   99.45   64.15
   0 -12  11  130.64   42.51
   0 -12 -12   65.20   49.91
   0 -12  12   30.21   31.47
   0 -12 -13 6029.67  432.85
   0 -12  13 7111.77  401.42
   0 -12 -14  649.45  164.21
   0 -12  14  851.67  197.33
   0 -12 -15 3150.17  686.05
   0 -12  15 2879.67  650.10
   0 -12 -16  386.73   58.95
   0 -12  16  441.78  136.33
   0 -12 -17   64.92   60.01
   0 -12  17   94.59   57.58
   0 -12 -17  128.54   53.94
   0  12 -17  131.85   34.88
   0 -12 -18   57.27   39.50
   0 -12  18   16.23   16.68
   0  12 -18    7.51   23.93
   0 -12 -19  173.12   98.93
   0 -12  19  174.78   69.39
   0  12 -19  202.90   57.13
   0 -12 -20   50.50   28.66
   0 -12  20   23.76   39.40
   0 -12 -21   41.59   43.94
   0 -12  21   58.79   30.35
   0 -14   024652.20  502.97
   0 -14   1  852.76  187.87
   0 -14  -1  679.67  182.24
   0 -14  -2 3302.24  259.91
   0 -14   2 3439.12  414.14
   0 -14  -3 1468.18  326.35
   0 -14   3 1817.85  433.36
   0 -14  -4 1476.30  339.47
   0 -14   4 1308.61  358.96
   0 -14  -5   79.18   33.93
   0 -14   5   35.15   52.02
   0 -14  -6 2309.69  167.04
   0 -14   6 2485.19  299.17
   0  14  -6 1973.65  155.34
   0 -14   6 1470.45  213.37
   0 -14  -7  212.30   87.95
   0 -14   7  242.04   69.20
   0  14  -7  176.30   30.81
   0 -14   7   87.54   22.69
   0 -14  -8  120.63  128.58
   0 -14   8  174.08   61.96
   0  14  -8  193.58   56.85
   0 -14   8  135.24   42.93
   0 -14  -9  297.37  158.69
   0 -14   9  148.35   85.43
   0  14  -9  231.00   37.66
   0 -14 -10 1568.90  337.98
   0 -14  10 1877.05  471.54
   0  14 -10 1211.69  264.95
   0 -14 -11   43.69   56.46
   0 -14  11   21.30   46.14
   0  14 -11   49.63   33.35
   0 -14 -12 1994.56  438.19
   0 -14  12 1774.59  514.52
   0  14 -12 1530.11  294.57
   0 -14 -13  122.68   70.30
   0 -14  13   86.27   59.87
   0  14 -13  152.95   58.60
   0 -14 -14  726.66  141.43
   0 -14  14  608.09  292.82
   0  14 -14  532.25  113.37
   0 -14 -15   53.99   60.99
   0 -14  15   50.09   35.79
   0  14 -15   42.68   20.35
   0 -14 -16 1008.68  264.35
   0 -14  16 1260.39  386.65
   0  14 -16 1162.19  168.41
   0 -14 -17   62.70   25.88
   0 -14  17  117.69   59.29
   0  14 -17  103.89   43.81
   0 -14 -18  496.48  160.25
   0 -14  18  275.27   87.62
   0  14 -18  225.08  100.82
   0  14 -18  209.88   74.43
   0 -14 -19   76.95   54.41
   0 -14  19   42.90   23.52
   0  14 -19  123.94   37.61
   0  14 -19  164.58   57.83
   0 -16   0  159.28   64.63
   0 -16   1  692.30  214.22
   0 -16  -1  860.14  215.14
   0 -16   2 2951.02  244.25
   0 -16  -2 2621.66  563.51
   0 -16  -3 4321.37  529.48
   0 -16   3 3743.86  286.58
   0 -16  -4 7613.50  574.55
   0 -16   4 7556.72  566.59
   0 -16  -5  700.32  164.84
   0 -16   5  558.96  115.20
   0 -16  -6  732.05  193.41
   0 -16   6  894.56  259.74
   0 -16  -7  169.14   89.49
   0 -16   7   84.99   28.56
   0 -16  -8   39.02   45.46
   0 -16   8   80.85   30.30
   0  16  -8   18.50   10.86
   0 -16  -9   98.50   46.95
   0 -16   9   45.11   37.48
   0  16  -9   75.06   34.64
   0 -16 -10  806.98  205.08
   0 -16  10  883.27  216.53
   0  16 -10  609.62  123.35
   0 -16 -11  411.93   94.65
   0 -16  11  581.30  138.22
   0  16 -11  307.93  113.60
   0 -16 -12  422.14   73.99
   0 -16  12  417.38  106.33
   0  16 -12  266.15   71.06
   0 -16 -13   28.49   72.43
   0 -16  13   25.01   43.01
   0  16 -13   35.15   23.85
   0 -16 -14  582.14  228.09
   0 -16  14  259.06  104.45
   0  16 -14  190.04   53.33
   0 -16 -15   87.94   34.46
   0 -16  15  114.27   52.75
   0  16 -15   14.88   15.52
   0 -16 -16  453.20   70.84
   0 -16  16  290.08  169.71
   0 -16 -17  115.52   52.17
   0 -16  17   74.46   37.77
   0 -16 -18   12.81   56.96
   0 -16  18    8.95   15.62
   0 -18   0   85.61   66.67
   0 -18   1 2376.01  650.06
   0 -18  -1 2594.61  202.51
   0 -18   2   -3.18   38.65
   0 -18  -2  101.87   56.88
   0 -18  -3  552.67  283.49
   0 -18   3  704.29  177.27
   0 -18  -4  316.54   76.30
   0 -18   4  140.14   65.74
   0 -18  -5  105.32   89.59
   0 -18   5  191.84   82.56
   0 -18  -6   32.57   40.59
   0 -18   6   63.54   48.32
   0 -18  -7  933.23  224.44
   0 -18   7 1161.29  380.21
   0 -18  -8   58.19   55.90
   0 -18   8   57.19   89.88
   0 -18  -9 1301.21  342.12
   0 -18   9 1127.47  316.63
   0 -18 -10   82.85   45.12
   0 -18  10   32.98   42.81
   0 -18 -11  133.42   61.08
   0 -18  11  168.89   55.74
   0 -18 -12   54.46   36.75
   0 -18  12   11.57   28.71
   0 -18 -13   86.72   63.08
   0 -18  13    2.01   23.17
   0 -18  14   55.66   61.52
   0 -18 -15  101.85   48.72
   0 -18  15   14.04   27.86
   0 -18 -16   33.73   47.79
   0 -18  16    0.47   28.32
   0 -20   0  167.18   68.40
   0 -20   1  179.08  118.36
   0 -20  -1  234.50   67.95
   0 -20  -2   36.58   54.34
   0 -20   2   69.74   41.13
   0 -20  -3  153.29   73.32
   0 -20   3  174.51   63.11
   0 -20  -4  474.31  177.57
   0 -20   4   34.78   38.05
   0 -20  -5   97.67   61.47
   0 -20   5  102.31   65.91
   0 -20  -6  121.07   79.13
   0 -20   6   93.75   45.87
   0 -20  -7   93.24   72.87
   0 -20   7   62.52   55.43
   0 -20  -8  101.70   48.83
   0 -20   8  106.89   60.54
   0 -20  -9   36.95   45.79
   0 -20   9   41.12   45.95
   0 -20 -10  210.83  108.40
   0 -20  10  339.64   68.59
   0 -20 -11   67.67   82.37
   0 -20  11   34.21   41.57
   0 -20 -12   51.42   46.53
   0 -20  12   33.88   49.76
   0 -20 -13   98.24   81.34
   0 -20  13  -24.71   15.01
   0 -20 -14   20.58   42.01
   0 -20  14   19.62   20.39
   0 -22   0  876.35  299.79
   0 -22  -1   76.30   51.02
   0 -22   1  155.61   88.38
   0 -22  -2   26.29   47.27
   0 -22   2  103.28   49.49
   0 -22  -3   47.06   26.58
   0 -22   3   29.83   40.81
   0 -22  -4  102.87   48.63
   0 -22   4   20.11   26.81
   0 -22  -5   52.61   61.94
   0 -22   5   97.14   50.24
   0 -22  -6   74.52   36.41
   0 -22   6    7.24   40.87
   0 -22  -7   53.24   31.52
   0 -22   7   93.19   62.99
   0 -22  -8   68.37   55.93
   0 -22   8   48.75   60.38
   0 -22  -9  106.25   77.54
   0 -22   9   78.97   38.26
   0 -22 -10   21.49   40.77
   0 -22  10   15.68   34.31
   0 -22 -11   47.31   46.30
   0 -22  11   48.77   33.66
   0 -24   0  106.77   68.04
   0 -24   1  157.55   98.85
   0 -24  -2   94.12   50.86
   0 -24   2   36.30   16.59
   0 -24  -3   28.07   60.30
   0 -24   3    3.15   43.88
   0 -24  -4   50.23   81.59
   0 -24   4    6.32    4.56
   0 -24  -5   48.73   41.09
   0 -24   5   20.52   30.59
   1   1 -24   24.69   31.72
   1  -1 -24   77.23   42.97
   1  -1 -23   38.75   59.17
   1   1 -23  100.18   51.42
   1  -1 -22   97.16   46.25
   1   1 -22   40.48   44.70
   1   1 -21  561.16  141.20
   1  -1 -21  329.49   64.16
   1  -1 -20   21.65   37.74
   1   1 -20  -23.01   36.89
   1   1 -19  767.16  267.35
   1  -1 -19  750.41  217.33
   1   1 -18  810.51  226.78
   1  -1 -18  870.94  146.81
   1  -1 -17  889.50  216.29
   1   1 -17 1003.63  138.28
   1  -1 -16 1426.99  233.16
   1   1 -16 1645.90  350.96
   1   1 -16 1085.90  263.16
   1  -1 -15 1726.89  272.64
   1   1 -15 1602.14  335.93
   1   1 -15 1390.68  180.48
   1  -1 -14 2265.54  422.59
   1   1 -14 2216.16  391.27
   1   1 -14 1992.48  135.46
  -1  -1  13   71.56   75.56
  -1  -1  13   16.00   18.92
   1   1 -13   34.40   11.19
   1  -1 -12   44.96   41.01
  -1  -1  12   75.43   32.53
  -1  -1  12   33.25   21.76
   1  -1 -12   29.61   14.15
   1   1 -12   37.95   31.40
   1  -1 -11  112.27   49.06
  -1  -1  11   98.29   63.95
  -1  -1  11   82.90   34.58
   1  -1 -11   76.29   25.89
   1   1 -11   92.68   33.07
   1  -1 -10 8747.02  277.73
  -1  -1  10 8814.46  280.16
  -1  -1  10 8175.25  221.30
   1  -1 -10 8602.75  244.05
  -1   1  10 8015.55  202.72
   1   1 -10 7842.99  251.15
   1  -1  -9  231.97   66.87
   1   1  -9  178.72   46.64
  -1  -1   9  283.09  110.30
  -1  -1   9  159.54   25.89
   1  -1  -9  217.86   35.46
   1   1  -9  159.26   42.40
  -1   1   9  159.45   41.02
   1  -1  -8  109.55   52.16
   1   1  -8   65.75   28.40
   1  -1  -8   75.61   54.77
  -1  -1   8  -23.90   49.34
  -1  -1   8   45.80   15.08
  -1   1   8   26.41   26.48
   1   1  -8  116.93   23.36
   1  -1  -7 1831.82  146.49
   1   1  -7 1823.42  180.98
  -1  -1   7 1850.95  249.84
   1  -1  -7 1673.84   87.37
   1  -1  -7 1782.07   75.33
  -1  -1   7 1961.00   69.43
  -1   1   7 1670.85   71.19
   1   1  -7 1739.38   72.15
   1  -1  -6   72.75   38.58
   1   1  -6  -42.41   36.02
  -1  -1   6   75.84   44.89
   1  -1  -6   66.61   44.55
   1  -1  -6   34.83   13.75
  -1  -1   6   56.58   35.40
  -1   1   6   80.56   15.21
   1   1  -6   47.40   31.51
   1  -1  -529883.30  411.34
   1   1  -528191.60  390.62
  -1  -1   529057.20  394.89
   1  -1  -528443.00  384.88
  -1  -1   529289.00  337.40
  -1   1   528095.10  306.58
   1  -1  -412234.40  206.89
   1   1  -411720.60  201.33
  -1  -1   412355.90  208.70
   1  -1  -412037.10  203.71
  -1   1   412140.90  150.32
  -1   1   345331.60  501.64
   1  -1  -344700.10  520.32
  -1  -1   346078.00  509.75
   1   1  -347199.50  517.77
   1   1   2 5223.42  130.36
  -1  -1  -2 5138.33  139.11
  -1   1  -2 5010.50  121.22
   1  -1   2 5281.78  139.47
  -1   1  -2 5424.98  147.11
   1  -1   2 4863.87  128.82
  -1   1  -2 4910.89  130.88
   1   1   2 5146.31  133.46
   1   1   316391.20  226.29
  -1  -1  -316526.90  231.57
  -1   1  -316066.10  221.89
   1  -1   316818.60  227.31
  -1   1  -316653.70  239.24
  -1  -1  -4 3310.87  142.05
  -1   1  -4 2878.26  113.18
   1  -1   4 3071.21  104.98
  -1  -1  -4 2969.61  182.73
  -1   1  -4 2949.71  141.48
   1  -1   4 2873.84   99.94
  -1   1  -4 2971.65  163.03
   1   1   4 2908.50   97.88
  -1  -1  -4 2735.49   95.08
  -1  -1  -510158.70  260.61
  -1   1  -5 9689.65  243.79
   1  -1   5 9706.43  248.97
  -1  -1  -5 9618.38  247.76
   1  -1   510621.40  261.91
  -1  -1  -510160.90  254.40
  -1   1  -510192.40  271.44
  -1   1  -5 9267.19  241.01
   1   1   510011.30  246.17
  -1  -1  -510523.30  259.56
  -1  -1  -6   30.41   29.67
  -1   1  -6   46.21   27.63
   1  -1   6   39.57   14.01
  -1  -1  -6   42.48   40.00
   1  -1   6   80.51   31.24
  -1  -1  -6   39.48   18.27
  -1   1  -6   97.91   35.40
   1   1   6   25.56   27.94
  -1   1  -6   27.53   32.13
  -1  -1  -6   76.89   36.85
  -1  -1  -7 6094.50  324.54
  -1   1  -7 5947.02  297.58
   1  -1   7 6547.15  306.06
  -1  -1  -7 6239.64  343.81
   1  -1   7 6043.82  276.77
  -1  -1  -7 6292.89  284.36
  -1   1  -7 6692.86  305.01
  -1   1  -7 6081.99  278.05
   1   1   7 6122.07  275.26
  -1  -1  -7 6359.33  299.36
  -1  -1  -8  227.90  129.79
  -1   1  -8  307.47   62.00
   1  -1   8  341.63   80.81
  -1  -1  -8  269.12   61.61
  -1  -1  -8  413.46   63.10
   1  -1   8  167.29   54.19
  -1   1  -8  377.95  102.49
  -1   1  -8  332.42   79.69
   1   1   8  219.10   54.97
  -1  -1  -8  294.26   82.33
  -1  -1  -9 6219.55  473.18
  -1   1  -9 5645.34  265.12
   1  -1   9 6581.57  311.09
   1  -1   9 5991.84  273.02
  -1  -1  -9 6129.13  324.35
  -1   1  -9 6641.22  300.60
   1   1   9 5906.07  269.97
  -1  -1  -9 6433.83  330.79
  -1   1  -9 6092.63  303.21
  -1  -1 -10   71.69   34.06
   1  -1  10   60.87   44.99
   1  -1  10   28.59   13.33
  -1  -1 -10   32.01   28.12
   1   1  10   22.72   15.03
  -1   1 -10  107.59   53.35
  -1  -1 -11  375.33   88.76
   1  -1  11  307.58   86.68
  -1  -1 -11  448.01   81.24
   1   1  11  315.37   80.38
  -1   1 -11  342.01  141.79
  -1  -1 -12 7821.02  321.95
   1  -1  12 6969.45  269.46
  -1  -1 -12 7507.51  332.39
   1   1  12 6567.80  257.39
  -1   1 -12 7514.67  320.08
  -1  -1 -13 1651.68  408.85
  -1   1 -13 2000.69  136.79
  -1  -1 -13 1671.77  100.09
  -1   1 -13 1761.87  210.08
  -1   1 -14 1820.05  317.98
  -1  -1 -14 1931.03  278.98
  -1  -1 -14 1779.32  151.63
  -1   1 -14 1437.41  142.18
  -1  -1 -15 2815.69  377.73
  -1   1 -15 2447.33  386.86
  -1  -1 -15 2637.98  388.02
  -1   1 -15 2599.08  137.56
  -1   1 -16   91.17   31.30
  -1  -1 -16   72.00   38.48
  -1   1 -16   23.65   27.72
  -1   1 -17  807.96  144.84
  -1  -1 -17  918.44  186.85
  -1  -1 -18  577.79  128.17
  -1   1 -18  470.65  101.37
  -1  -1 -19  195.28   34.61
  -1   1 -19  186.97   56.23
  -1  -1 -20  352.19  102.91
  -1   1 -20  255.37   90.51
  -1   1 -21   35.92   27.10
  -1  -1 -21   32.72   37.68
  -1   1 -22    0.98   38.60
  -1  -1 -22   73.24   39.91
  -1   1 -23   41.31   34.07
  -1  -1 -23   17.08   22.93
   1   3 -24   89.75   49.65
   1  -3 -24  163.92   79.97
   1   3 -23   40.68   32.96
   1  -3 -23   52.77   18.51
   1  -3 -22   56.97   60.04
   1   3 -22   59.62   51.47
   1  -3 -21   44.48   45.04
   1   3 -21   28.07   52.44
   1   3 -20   53.42   39.59
   1  -3 -19   57.67   40.15
   1   3 -19   50.15   32.98
   1  -3 -18   46.34   50.73
   1   3 -18   30.96   20.76
   1  -3 -17 1556.48  363.58
  -1  -3  17 1577.63  365.30
   1  -3 -17 1292.64  176.92
   1   3 -17 1386.25  252.50
   1  -3 -16  588.68  186.45
  -1  -3  16  507.45  110.77
   1  -3 -16  347.90   62.98
   1   3 -16  453.03   90.41
   1  -3 -15 1693.37  420.37
  -1  -3  15 1889.97  221.33
   1  -3 -15 1591.08  115.41
  -1   3  15 1101.81   97.63
   1   3 -15 1473.95  176.67
   1  -3 -14 9512.70  517.26
  -1  -3  14 8596.85  393.02
   1  -3 -14 8932.80  478.38
   1   3 -14 9692.15  445.48
  -1   3  14 8066.92  390.66
   1  -3 -13 5819.38  268.48
  -1  -3  13 5575.15  332.11
   1  -3 -13 5768.90  455.99
  -1   3  13 4876.59  330.65
   1   3 -13 5621.77  343.65
   1  -3 -12 5446.89  575.97
  -1  -3  12 5050.17  366.64
   1  -3 -12 4802.12  383.51
  -1  -3  12 4720.46  320.84
  -1   3  12 4254.20  310.77
   1   3 -12 4781.62  332.84
   1  -3 -11   97.74   59.01
  -1  -3  11   57.39   51.82
   1  -3 -11    4.93   14.98
  -1  -3  11   50.44   28.72
  -1   3  11    8.10   17.81
   1   3 -11    4.98   16.69
   1  -3 -10  790.19  167.63
  -1  -3  10  855.24  225.82
   1  -3 -10  667.66   46.89
  -1  -3  10  609.30  120.61
   1   3 -10  717.99  181.95
  -1   3  10  567.99   61.84
   1  -3  -9   65.61   36.39
  -1  -3   9   49.42   28.99
   1  -3  -9   56.83   27.64
  -1  -3   9   51.65   19.30
  -1   3   9   65.70   22.28
   1  -3  -8 4762.62  393.44
   1   3  -8 3616.98  334.60
  -1  -3   8 4468.71  234.99
  -1  -3   8 4585.31  230.64
  -1   3   8 4427.72  204.64
   1  -3  -7  287.32  108.34
  -1   3   7  129.60   55.01
   1   3  -7  364.92  103.54
  -1  -3   7  338.47   79.59
  -1   3   618858.60  317.74
   1  -3  -619949.00  339.19
  -1  -3   619788.70  334.01
   1   3  -618831.50  340.43
  -1   3   5 3023.74  121.90
   1  -3  -5 3235.08  152.59
   1   3  -5 2909.92  167.08
  -1  -3   5 3212.66  126.87
  -1   3   4 7089.45  221.69
   1  -3  -4 7312.68  220.21
   1   3  -4 6780.25  189.97
  -1  -3   4 7065.85  200.85
  -1   3   312696.00  213.50
   1  -3  -312977.30  224.00
  -1  -3   312514.80  212.76
   1   3  -312525.80  208.64
  -1   3   210262.20  291.35
   1  -3  -210736.00  263.04
  -1  -3   210073.80  246.55
   1   3  -210138.30  246.76
   1  -3  -118624.40  256.84
  -1   3   118296.80  252.71
   1   3  -117963.90  250.56
  -1  -3   118211.10  254.67
   1   3   0 3045.56  117.70
   1  -3   0 3205.22  101.69
  -1   3   0 3250.58  105.30
  -1  -3   0 3379.12  131.49
  -1  -3   0 3165.76   74.56
   1  -3   0 3208.51   84.02
  -1   3   0 3220.31  113.31
   1   3   0 3209.25   76.22
  -1   3   0 3249.34  108.02
  -1  -3  -164443.60  693.07
   1   3   163027.50  676.58
  -1   3  -163051.70  663.37
   1  -3   163079.90  667.79
   1  -3   161183.60  625.28
   1  -3   162228.40  635.90
  -1   3  -161150.20  627.61
   1   3   2  521.01   89.20
  -1  -3  -2  525.44  143.95
  -1   3  -2  528.58   43.84
   1  -3   2  466.93  120.21
   1  -3   2  491.51   96.66
  -1  -3  -311341.40  181.57
   1   3   310988.60  296.12
  -1   3  -311182.80  155.24
   1  -3   311362.10  196.17
   1   3   415635.80  276.16
  -1  -3  -415645.20  267.93
  -1   3  -415015.60  270.08
   1  -3   415362.40  273.04
   1   3   5   31.36   10.77
  -1  -3  -5   91.45   46.95
  -1   3  -5   86.09   36.89
   1  -3   5   52.23   49.87
   1  -3   5   89.24   32.82
   1   3   610144.10  389.39
  -1  -3  -610530.70  335.78
  -1   3  -610048.80  320.29
   1  -3   610477.60  329.07
   1  -3   610583.10  331.94
   1   3   610358.40  317.69
   1   3   7  113.50   48.16
  -1  -3  -7  130.35   60.23
  -1   3  -7   66.75   33.55
   1  -3   7  163.49   48.07
   1  -3   7  144.10   26.62
  -1   3  -7  217.15   64.53
   1   3   7  160.42   41.94
  -1  -3  -8 2699.96  298.69
  -1   3  -8 2435.65  154.95
   1  -3   8 2680.65  281.55
  -1  -3  -8 2549.11  103.74
   1  -3   8 2815.40  108.36
  -1   3  -8 2632.75  113.63
   1   3   8 2409.48   92.22
  -1  -3  -9   88.77   47.81
   1  -3   9  101.06   50.61
  -1  -3  -9   47.11   40.93
   1  -3   9   44.82   30.00
  -1   3  -9  171.66   61.89
   1   3   9  223.47   88.81
  -1  -3 -10  182.33   82.86
   1  -3  10  190.70   57.01
  -1  -3 -10  224.53   49.70
   1  -3  10  165.21   35.94
   1   3  10  116.84   73.91
  -1   3 -10  221.49   66.39
  -1  -3 -11   65.95   30.38
   1  -3  11   35.94   39.77
  -1  -3 -11   19.64   27.01
  -1   3 -11   49.49   30.09
   1   3  11   45.96   23.08
  -1  -3 -12 3652.14  448.27
   1  -3  12 3799.79  272.20
  -1  -3 -12 3223.55  216.05
   1   3  12 2556.29  289.67
  -1   3 -12 3541.77  232.24
  -1  -3 -13 1302.78  249.08
   1  -3  13 1418.19  137.42
  -1  -3 -13 1072.42  119.99
  -1   3 -13 1268.07  160.15
  -1  -3 -14 2916.17  511.92
  -1  -3 -14 2980.72  262.64
  -1   3 -14 2617.35  127.75
  -1  -3 -15  204.93   89.04
   1  -3  15  193.46   67.60
  -1  -3 -15  199.44   59.68
  -1   3 -15  195.74   56.21
  -1  -3 -16  858.37  133.31
  -1  -3 -16  728.16  211.77
  -1   3 -16  677.94   86.37
  -1   3 -17  331.30   87.35
  -1  -3 -17  376.45  132.52
  -1  -3 -17  222.86   63.77
  -1   3 -17   89.64   62.75
  -1  -3 -18   46.16   51.22
  -1   3 -18   58.87   49.06
  -1  -3 -18   14.83   15.17
  -1   3 -18    4.23   16.73
  -1   3 -19  100.68   45.15
  -1  -3 -19   45.21   42.90
  -1   3 -20   10.10   13.09
  -1  -3 -20   29.42   39.52
  -1   3 -21  176.17   55.77
  -1  -3 -21  157.82   56.19
  -1   3 -22  327.28   80.35
  -1  -3 -22  277.02  116.77
  -1   3 -23  405.73   90.81
  -1  -3 -23  484.99  104.77
   1   5 -24  661.33  135.90
   1  -5 -24  375.47   84.70
   1   5 -23   26.44   35.31
   1  -5 -23   11.84   35.92
   1   5 -22  236.68   70.01
   1  -5 -22  209.59  122.84
   1   5 -21   89.63   66.67
   1  -5 -21   70.06   55.56
   1  -5 -20  602.71  176.62
  -1  -5  20  509.82  148.51
   1  -5 -19  532.65  123.37
  -1  -5  19  560.07  163.80
   1  -5 -18  460.45  125.97
  -1  -5  18  316.04   96.08
   1   5 -18  245.47  127.73
   1  -5 -17 3599.62  233.32
  -1  -5  17 3915.18  276.91
   1  -5 -17 3131.79  264.31
   1   5 -17 2738.67  338.26
   1  -5 -16  300.37   62.98
  -1  -5  16  287.04   60.21
   1  -5 -16  161.76   42.76
   1   5 -16  115.09   37.66
   1  -5 -15   77.91   44.79
  -1  -5  15   55.98   74.59
   1  -5 -15   92.99   41.51
  -1   5  15   51.32   16.03
   1   5 -15  142.94   67.80
   1  -5 -14 1129.97  196.62
  -1  -5  14 1094.32  261.10
   1  -5 -14 1041.23  199.01
   1   5 -14  829.39  268.35
  -1   5  14  612.31  162.57
   1  -5 -13   99.83   55.24
   1  -5 -13   71.63   35.51
   1   5 -13   70.81   36.80
  -1   5  13   18.38   16.77
   1  -5 -1210962.90  427.33
  -1  -5  1210306.30  511.80
   1  -5 -1210478.10  369.79
  -1   5  12 9905.24  357.03
   1  -5 -11 1827.78  327.03
  -1  -5  11 1963.90  428.32
  -1  -5  11 1681.41   87.70
  -1   5  11 1519.71   72.70
   1  -5 -10 1641.14  355.62
  -1  -5  10 1782.73  122.89
   1  -5  -9 5489.37  333.13
  -1  -5   9 5315.56  279.38
   1  -5  -8 8719.14  368.56
  -1  -5   8 8765.31  294.72
   1  -5  -7 4955.29  262.07
   1   5  -7 4527.44  230.49
  -1  -5   7 4794.02  297.11
  -1   5   6 5319.79  291.70
   1  -5  -6 5478.97  276.42
   1   5  -6 5161.35  279.35
  -1  -5   6 5509.96  272.21
   1  -5  -5   81.02   42.28
  -1   5   5   53.54   34.93
  -1  -5   5   67.81   39.15
   1   5  -5   15.39   25.23
  -1   5   4 3725.87  186.58
   1  -5  -4 3519.14  144.36
  -1  -5   4 3724.76  144.17
   1   5  -4 3729.29  139.01
  -1   5   3 2551.68  175.52
   1  -5  -3 2611.89  125.05
   1   5  -3 2363.49  124.74
  -1  -5   3 2489.92  115.31
  -1   5   211333.30  213.38
   1  -5  -211605.90  261.08
  -1  -5   211890.60  229.23
   1   5  -211119.30  195.41
   1  -5  -1  141.43   61.81
  -1   5   1  -15.89   46.19
   1   5  -1   91.05   33.31
  -1  -5   1  131.39   41.20
   1   5   0  451.99  105.73
  -1   5   0  577.87   91.14
  -1  -5   0  550.28   81.95
   1  -5   0  564.54  127.25
  -1   5   0  461.11   66.99
  -1  -5  -1 3680.53  136.44
   1   5   1 3561.65  176.64
  -1   5  -1 3453.52  126.15
   1  -5   1 3355.17  130.10
   1  -5   1 3287.41  149.67
  -1   5  -1 3385.97  108.49
   1  -5   1 3334.03  104.41
  -1   5  -1 3411.12   98.21
   1   5   2  280.98   58.09
  -1  -5  -2  140.72   77.77
  -1   5  -2  187.82   37.37
   1  -5   2  161.94   64.71
  -1   5  -2  189.16   48.84
   1  -5   2  222.88   47.70
   1   5   317222.80  295.07
  -1  -5  -316749.80  304.02
  -1   5  -316535.60  274.85
   1  -5   317449.20  287.97
   1  -5   316599.90  248.58
  -1  -5  -4  584.14  126.47
   1   5   4  380.18  118.86
   1  -5   4  490.25  124.24
  -1   5  -4  393.34  184.46
   1  -5   4  461.62  122.32
   1   5   535046.30  960.61
  -1  -5  -536928.00 1011.58
  -1   5  -534842.40  949.36
   1  -5   534904.70  950.09
   1   5   622607.40  655.45
  -1  -5  -624384.90  715.57
  -1   5  -622993.80  667.79
   1  -5   623765.40  681.95
  -1  -5  -710304.50  299.66
  -1   5  -7 9996.67  271.97
   1  -5   710637.00  297.18
  -1  -5  -810409.30  389.65
   1  -5   810487.40  430.44
  -1  -5  -9 5906.60  261.36
   1  -5   9 6130.74  266.19
   1   5   9 5032.81  207.03
  -1  -5 -10   39.54   45.98
   1  -5  10   61.34   51.94
  -1   5 -10   53.32   28.32
   1   5  10   61.04   19.21
  -1  -5 -11 2596.92  527.32
   1  -5  11 2641.41  191.70
  -1  -5 -11 2226.38  147.29
  -1   5 -11 2472.89  210.35
  -1  -5 -12 2187.18  440.93
   1  -5  12 1842.86  428.66
  -1  -5 -12 1927.15  231.71
  -1   5 -12 2015.17  329.05
  -1  -5 -13  919.49  235.41
  -1  -5 -13  812.31  144.04
  -1   5 -13  635.69  201.44
  -1  -5 -14 4942.14  424.85
   1  -5  14 4608.43  391.93
  -1  -5 -14 4264.10  293.60
  -1   5 -14 4162.39  236.67
  -1  -5 -15  120.70   58.87
   1  -5  15  111.11   38.43
  -1  -5 -15   70.61   46.84
  -1   5 -15  156.65   61.70
   1  -5  16  252.99   87.58
  -1  -5 -16  193.09   98.28
  -1  -5 -17   40.11   19.45
   1  -5  17   53.75   59.34
  -1  -5 -17   24.00   32.81
  -1  -5 -18  597.37  168.44
   1  -5  18  418.06  175.62
  -1  -5 -18  427.67  106.25
  -1   5 -18  356.18  145.29
  -1  -5 -19   64.35   45.89
  -1   5 -20  590.40  178.09
  -1  -5 -20  624.53  179.79
  -1   5 -21  407.82   91.21
  -1  -5 -21  327.27  121.78
  -1   5 -22   58.75   56.05
  -1  -5 -22  172.81   73.38
  -1   5 -23   93.29   51.57
  -1  -5 -23   86.52   28.88
   1  -7 -23  130.68   66.49
   1  -7 -22   59.67   55.57
  -1  -7  22  208.33   83.70
  -1  -7  21  917.60  279.58
   1  -7 -20  146.25   61.00
  -1  -7  20  120.76   80.94
   1  -7 -19  340.72   88.41
  -1  -7  19  299.82   73.01
   1  -7 -18   64.07   31.26
  -1  -7  18   41.21   56.93
   1  -7 -17   47.42   35.34
  -1  -7  17   12.58   35.47
   1  -7 -17   25.44   10.54
   1  -7 -16  242.49   94.43
  -1  -7  16  204.92   61.44
   1  -7 -16  133.95   50.85
   1   7 -16   80.35   75.84
   1  -7 -15  247.75  136.07
  -1  -7  15  341.03   98.61
   1  -7 -15  300.66   96.87
   1   7 -15  410.36  103.00
   1  -7 -14  462.70   83.58
  -1  -7  14  594.80  169.43
   1  -7 -14  516.57  114.77
   1  -7 -13  873.10  192.87
  -1  -7  13  689.36  198.14
   1  -7 -12   59.64   34.57
   1  -7 -1110875.00  435.24
  -1  -7  1110230.40  414.16
   1  -7 -10   55.99   47.37
  -1  -7  10   35.95   38.54
   1  -7  -918194.80  641.76
  -1  -7   919062.10  783.30
   1  -7  -8  293.73   97.27
   1  -7  -717052.30  457.28
  -1  -7   717304.20  451.28
   1  -7  -6  661.72   89.53
  -1  -7   6  452.91   66.22
   1  -7  -5 1439.29   99.46
  -1  -7   5 1477.53  120.98
  -1   7   4 1088.75  272.96
   1  -7  -4 1234.95  109.56
   1   7  -4  944.11  243.49
  -1  -7   4 1178.20  146.44
  -1   7   3 2812.09  164.77
   1  -7  -3 2994.71  222.28
   1   7  -3 2987.43  197.76
  -1  -7   3 3205.89  256.18
   1  -7  -2 2056.34  146.68
  -1  -7   2 2104.13  113.43
   1   7  -2 1948.50   97.08
  -1  -7   2 2012.08   47.66
  -1   7   1 2500.89  230.99
   1   7  -1 2507.12  215.09
   1  -7  -1 2798.33  142.88
  -1  -7   1 2401.53  131.39
   1  -7  -1 2485.80  101.61
   1   7   0  257.46   47.74
  -1   7   0  311.87   61.41
   1  -7   0  132.77   84.24
  -1  -7   0  388.86   95.64
   1  -7   0  215.06   36.78
  -1   7   0  277.53   43.26
  -1   7  -112746.80  391.42
   1   7   113014.40  407.02
   1  -7   113725.50  433.68
  -1  -7  -113798.60  432.73
  -1   7  -113202.70  362.99
  -1   7  -113193.20  367.61
  -1  -7  -2  782.91  190.77
   1   7   2  705.33  234.01
   1  -7   2  786.35  217.94
  -1   7  -2  861.41  237.99
  -1   7  -2  743.41  103.52
   1  -7   2  722.63   41.54
   1   7   3 3463.11  249.20
  -1  -7  -3 3882.31  213.78
  -1   7  -3 3425.61  191.35
   1  -7   3 3437.26  189.42
  -1   7  -3 3438.87  173.19
   1  -7   3 3438.02  165.76
  -1  -7  -4 2153.06  239.63
  -1   7  -4 1653.91  203.18
   1  -7   4 1716.35  103.40
  -1   7  -4 1768.99  122.82
   1  -7   4 1639.79  128.36
  -1  -7  -515302.20  402.32
  -1   7  -514192.00  356.89
   1  -7   515723.20  395.90
   1  -7   514679.20  343.27
  -1  -7  -6 2164.70  121.35
   1  -7   6 2188.10  115.67
   1  -7   6 2068.08   92.46
  -1  -7  -7 8418.97  485.24
   1  -7   7 7459.96  208.77
  -1  -7  -8 2459.08  201.79
   1  -7   8 2242.28  148.24
  -1  -7  -927428.50  952.14
   1  -7   928335.80 1076.35
  -1  -7 -10  975.49  184.94
   1  -7  10  900.94  287.98
  -1  -7 -11 3405.26  211.04
   1  -7  11 3509.93  191.89
  -1  -7 -12  378.21   69.73
  -1   7 -12  492.42  151.35
  -1  -7 -13   56.27   49.33
   1  -7  13   50.38   44.66
  -1  -7 -13  103.83   40.73
  -1   7 -13  101.08   39.34
  -1  -7 -14   79.19   73.97
   1  -7  14  109.73   52.65
  -1  -7 -14  120.03   84.46
  -1  -7 -15 1675.44  341.20
   1  -7  15 1734.19  519.75
  -1  -7 -15 1884.40  162.83
  -1   7 -15 1636.07  473.00
  -1  -7 -16   84.14   43.59
   1  -7  16  264.76   59.15
  -1  -7 -16  155.63   81.24
  -1   7 -16  157.08   65.69
  -1  -7 -17 3112.19  674.20
   1  -7  17 3913.47  496.57
  -1  -7 -17 3529.14  435.03
  -1   7 -17 2758.25  692.69
  -1  -7 -18  135.37   56.31
   1  -7  18   90.19   72.56
  -1   7 -18   43.99   24.33
  -1  -7 -19  793.23  140.52
   1  -7  19  511.58  150.51
  -1   7 -19  319.60   87.21
  -1  -7 -20    5.21   30.26
   1  -7  20   59.56   42.89
  -1  -7 -21   30.07   48.09
  -1   7 -22   59.29   31.78
  -1  -7 -22   36.73   46.30
   1  -9 -22   48.79   48.00
  -1  -9  22   49.32   25.45
   1  -9 -21  268.44   75.59
  -1  -9  21  369.80  131.49
   1  -9 -20   68.93   41.19
   1  -9 -19 1264.24  263.99
  -1  -9  19  652.10  179.86
   1   9 -19  782.58  187.45
  -1  -9  18  226.34   92.64
   1   9 -18  138.18   67.68
   1  -9 -17  980.38  256.54
  -1  -9  17  966.16  390.35
   1  -9 -17  663.85  177.66
   1   9 -17  848.65  236.69
   1  -9 -16  337.23   62.66
  -1  -9  16  204.61   46.87
   1  -9 -16  183.86   54.72
   1   9 -16  412.55   94.43
   1  -9 -15  803.26  191.65
  -1  -9  15  691.46  170.44
   1  -9 -14   70.19   36.07
  -1  -9  14   49.78   48.25
   1  -9 -13   25.32   63.63
  -1  -9  13   74.25   67.67
   1  -9 -12 2288.25  427.04
  -1  -9  12 2027.05  469.85
   1  -9 -11  115.07   59.22
  -1  -9  11  273.52   99.72
   1  -9 -10 1568.29  300.25
   1  -9  -9  642.20  143.60
  -1  -9   9  614.80  165.68
   1  -9  -8 3770.99  203.96
  -1  -9   8 3070.83  171.28
   1  -9  -7 1442.46  340.35
  -1  -9   7 1489.79  110.81
   1  -9  -6 1607.85  355.95
  -1  -9   6 1744.95  129.21
   1  -9  -515775.50  433.42
  -1  -9   515883.10  466.13
  -1  -9   514611.50  324.78
   1  -9  -4 1820.52  148.11
  -1  -9   4 1881.66  116.74
   1   9  -4 1617.85  107.45
  -1  -9   4 1522.64   90.50
   1  -9  -3 2152.13  150.19
  -1  -9   3 2339.24  232.16
  -1  -9   3 2144.85   55.59
   1  -9  -226936.70  633.46
  -1  -9   227696.60  642.20
  -1  -9   1 1851.81  123.72
   1  -9  -1 1716.27  114.04
   1  -9  -1 1786.56   60.04
  -1   9   1 1795.12   96.40
  -1  -9   0  152.78  127.96
   1  -9   0  269.94   74.83
   1  -9   0  260.34   47.69
  -1   9   0  283.96   30.41
  -1  -9  -121832.00  623.47
   1  -9   122435.40  543.01
  -1  -9  -121220.60  399.62
   1   9   122088.00  410.01
  -1  -9  -2 1227.62  108.41
   1  -9   2 1353.07  124.35
  -1   9  -2 1186.27  110.63
   1  -9   2 1132.72  115.46
  -1  -9  -310998.30  327.72
   1  -9   311111.20  325.58
  -1   9  -311364.60  264.75
   1  -9   310890.20  254.78
  -1  -9  -425907.20  627.01
   1  -9   426027.20  611.99
  -1   9  -425254.20  535.00
   1  -9   424742.40  518.79
  -1  -9  -5  174.84   61.47
   1  -9   5  118.84   52.99
  -1   9  -5  154.14   45.05
   1  -9   5  100.64   29.29
  -1  -9  -615370.10  556.04
   1  -9   615139.30  549.28
  -1   9  -615394.70  537.08
   1  -9   614004.30  468.45
  -1  -9  -7  110.96   66.28
   1  -9   7   84.63   51.36
   1  -9   7   63.86   19.03
  -1  -9  -8 3809.22  269.76
   1  -9   8 4008.71  278.03
  -1  -9  -9 1658.40  151.16
   1  -9   9 1566.03  367.35
  -1  -9 -10 8865.59  454.15
  -1  -9 -1110962.40  538.43
  -1  -9 -12  285.65   72.24
   1  -9  12  422.45   96.08
  -1  -9 -13 4759.43  855.52
   1  -9  13 5285.37  237.49
  -1  -9 -14  105.32   59.97
   1  -9  14  157.38   61.70
  -1   9 -14   81.11   61.46
  -1  -9 -15   13.57   49.81
   1  -9  15   60.31   39.89
  -1  -9 -15   96.58   31.13
  -1   9 -15   42.61   23.61
  -1  -9 -16  892.14  344.34
   1  -9  16  634.20  160.46
  -1  -9 -16  616.85  162.02
  -1   9 -16  571.22  141.44
  -1  -9 -17   44.06   26.67
   1  -9  17    3.61   37.38
  -1  -9 -17   12.83    9.81
  -1   9 -17   36.55   22.56
  -1  -9 -18   60.22   40.11
   1  -9  18   37.99   63.28
  -1   9 -18   37.01   18.73
  -1  -9 -19  374.67  175.05
   1  -9  19  473.55  141.39
  -1   9 -19  311.59   74.52
  -1  -9 -20   56.63   38.58
   1  -9  20   10.48   35.60
  -1  -9 -21   15.76   29.50
   1  -9  21   62.11   26.93
   1 -11 -22   24.54   41.26
  -1 -11  22   54.99   53.48
   1 -11 -21   61.20   36.57
  -1 -11  21   55.97   34.78
   1 -11 -20   83.33   57.19
  -1 -11  20   80.85   60.38
   1 -11 -19   45.60   61.82
  -1 -11  19   28.00   35.29
   1  11 -19    3.91   12.33
   1 -11 -18  197.50   62.56
  -1 -11  18  216.49   91.94
   1  11 -18  149.70   71.87
   1 -11 -17  284.43   62.46
  -1 -11  17  307.74  111.42
   1 -11 -17  123.53   54.36
   1 -11 -16  994.20  203.21
  -1 -11  16 1218.60  190.98
   1 -11 -15   97.51  102.83
  -1 -11  15   56.62   49.85
   1 -11 -14  520.92  113.26
  -1 -11  14  354.79  117.47
   1 -11 -13 3890.77  780.89
  -1 -11  13 3942.85  211.86
   1 -11 -12  474.67   73.87
  -1 -11  12  297.66   95.56
   1 -11 -11  165.27   68.69
  -1 -11  11  100.92   65.20
   1 -11 -10  256.43  132.54
  -1 -11  10   38.78   24.84
   1 -11  -9 1240.16  374.44
  -1 -11   9 1421.96  140.19
   1 -11  -8 4660.03  288.45
  -1 -11   8 5010.05  211.82
  -1 -11   8 4180.72  174.01
   1 -11  -7  284.49   26.25
  -1 -11   7  161.56   43.77
   1  11  -6 1198.58  145.02
  -1 -11   6  962.03  132.14
  -1 -11   5 1750.92  124.36
   1  11  -5 1682.73  119.41
  -1 -11   5 1608.62   85.71
   1 -11  -4  454.78   92.31
  -1 -11   4  375.70  142.26
  -1 -11   4  316.31   57.16
   1 -11  -3 2680.12  190.40
  -1 -11   3 2312.25  160.65
  -1 -11   210839.50  429.76
   1 -11  -210871.00  429.00
   1 -11  -210410.60  330.56
   1 -11  -1 5693.28  272.38
  -1 -11   1 5912.60  296.30
   1 -11  -1 5325.91  112.00
  -1  11   1 5140.02  156.54
  -1 -11   0 9822.17  453.59
   1 -11   0 9539.70  401.09
  -1  11   0 8739.14  284.48
   1 -11   119172.40  667.93
  -1 -11  -119071.90  747.48
   1 -11   2 5771.16  286.72
  -1 -11  -2 5632.70  374.39
  -1 -11  -3  974.64  238.20
   1 -11   3  948.66  272.04
  -1  11  -3  839.65  109.65
   1 -11   3  687.69   97.48
  -1 -11  -4  442.22   75.07
   1 -11   4  206.51   66.92
   1 -11   4  348.58   70.94
  -1 -11  -5   51.75   44.60
   1 -11   5   66.33   47.21
  -1  11  -5   29.69   18.99
   1 -11   5   25.02   27.04
  -1 -11  -6  -24.94   52.06
   1 -11   6   75.06   43.62
  -1  11  -6   27.56   35.99
   1 -11   6   14.80   11.44
  -1 -11  -7  294.14  134.38
  -1  11  -7  268.28   96.05
   1 -11   7  132.63   43.88
  -1 -11  -8 7619.62  411.32
  -1  11  -8 6768.02  452.51
  -1 -11  -9   79.77   50.97
   1 -11   9  245.19   76.65
  -1  11  -9  150.80   48.83
  -1 -11 -10 4885.75  377.05
   1 -11  10 5007.95  284.39
  -1  11 -10 5062.15  346.69
  -1 -11 -11  476.11  129.09
   1 -11  11  648.52  163.12
  -1 -11 -12  644.72  143.18
   1 -11  12  436.64  126.40
  -1 -11 -13  101.70   43.77
   1 -11  13  107.18   57.05
  -1 -11 -14 4313.99  782.20
   1 -11  14 4841.01  403.46
  -1 -11 -15 1642.53  399.93
   1 -11  15 1397.43  353.01
  -1  11 -15 1688.73  511.81
  -1 -11 -16  205.40   54.86
   1 -11  16  202.33   59.88
  -1 -11 -16  237.01   55.01
  -1  11 -16  160.31   53.61
  -1 -11 -17   16.48   34.39
   1 -11  17   17.32   30.05
  -1 -11 -17    1.08   25.52
  -1  11 -17   -0.88   13.02
   1 -11  18   27.88   25.16
  -1  11 -18   53.39   10.93
  -1 -11 -19   66.90   48.82
   1 -11  19  123.76   44.26
  -1  11 -19   14.49   17.87
  -1 -11 -20   23.74   53.56
   1 -11  20   55.99   39.67
  -1 -11 -21   19.26   33.59
   1 -11  21   13.44   17.39
   1 -13 -20   33.99   40.06
  -1 -13  20   61.10   47.44
   1 -13 -19   45.43   29.58
  -1 -13  19   14.59   30.32
   1  13 -19   15.65   17.55
   1 -13 -18   45.51   37.17
  -1 -13  18   37.63   37.27
   1 -13 -17   35.39   45.28
  -1 -13  17  109.65   44.98
   1 -13 -16  298.21  110.92
  -1 -13  16  104.40   53.80
   1 -13 -15 1271.26  345.38
  -1 -13  15 1770.80  375.98
   1 -13 -14  104.60   68.57
  -1 -13  14   49.26   73.26
   1 -13 -13   41.98   44.83
  -1 -13  13   91.27   45.81
   1 -13 -12   16.40   33.60
  -1 -13  12   70.22   42.46
   1 -13 -11  614.42  105.46
  -1 -13  11  321.00   88.28
   1 -13 -10  233.49  107.96
  -1 -13  10  189.99   74.11
   1 -13  -9   42.27   81.33
  -1 -13   9  152.29   59.57
   1  13  -9   29.82   21.51
   1 -13  -8  260.42   65.49
  -1 -13   8  218.33   87.41
   1  13  -8  213.15   73.49
  -1 -13   8   32.10   41.70
   1 -13  -7 2691.77  609.87
  -1 -13   7 2551.32  179.62
   1  13  -7 2542.94  125.24
  -1 -13   7 2390.65  118.45
   1 -13  -6  281.53  165.70
  -1 -13   6  363.01  121.17
   1  13  -6  321.98   80.52
  -1 -13   6  237.78   50.96
  -1 -13   5 2155.65  534.69
  -1 -13   5 1001.30   64.67
   1 -13  -4 3830.64  263.79
  -1 -13   4 4077.00  333.69
   1 -13  -3 5045.08  395.87
  -1 -13   3 5205.72  357.90
   1 -13  -3 4361.13  247.51
  -1 -13   2  751.69  202.89
   1 -13  -2  688.51  190.36
   1 -13  -2  416.99   71.51
  -1  13   2  442.58   60.08
   1 -13  -1  439.16   83.94
  -1 -13   1  302.65   83.81
   1 -13   0 1984.07  232.61
  -1 -13   0 1968.84  221.09
  -1 -13  -1 5006.22  341.17
   1 -13   1 4985.66  347.85
  -1 -13  -2  336.83  101.48
   1 -13   2  188.54   64.41
  -1 -13  -3  362.83  110.54
   1 -13   3  412.96  132.20
   1  13   3  268.43   53.60
  -1 -13  -4  531.16  104.92
   1 -13   4  749.88  170.55
  -1  13  -4  451.84   91.07
  -1 -13  -5   83.28   87.75
   1 -13   5   55.39   60.44
  -1  13  -5   16.45   23.51
   1 -13   5    1.88    5.95
  -1 -13  -6 2112.55  401.29
   1 -13   6 2481.21  177.74
  -1  13  -6 2193.33   99.82
   1 -13   6 1770.72   87.01
  -1 -13  -7  414.55   94.78
   1 -13   7  452.43   94.79
  -1  13  -7  431.80   84.27
   1 -13   7  192.07   50.52
   1 -13   8  255.71   69.50
  -1 -13  -9  829.75  173.73
   1 -13   9  911.89  212.49
  -1  13  -9  816.14  150.24
  -1 -13 -10 1138.54  174.41
   1 -13  10  817.17  171.12
  -1  13 -10  618.07  139.44
  -1 -13 -11  130.96   58.50
   1 -13  11  239.40   63.18
  -1  13 -11   77.40   38.52
  -1 -13 -12  169.69   63.08
   1 -13  12  145.14   75.95
  -1  13 -12   98.19  112.70
  -1 -13 -13  905.51  160.41
   1 -13  13  596.96  130.64
  -1  13 -13  629.93  136.41
  -1 -13 -14   14.59   34.03
   1 -13  14   73.17   45.05
  -1  13 -14   72.71   49.03
  -1 -13 -15   46.32   64.10
   1 -13  15   99.71   58.08
  -1  13 -15  206.52   59.98
  -1 -13 -16   81.75   44.66
   1 -13  16   29.65   36.30
  -1  13 -16   94.33   41.81
  -1 -13 -17  358.34   81.39
   1 -13  17  261.20  146.25
  -1  13 -17  365.04   97.22
  -1  13 -17  264.35   94.69
  -1 -13 -18   72.84   48.76
   1 -13  18    6.39   10.48
  -1  13 -18   43.47   36.20
  -1  13 -18   30.86   24.91
  -1 -13 -19   20.43   33.33
   1 -13  19   22.23   39.87
  -1  13 -19   85.15   32.46
  -1  13 -19   58.61   42.52
   1 -15 -19   60.40   37.58
  -1 -15  19    1.97   26.87
   1  15 -19   37.19   38.06
   1 -15 -18   29.55   36.51
  -1 -15  18   39.04   26.74
   1  15 -18   34.57   17.03
   1 -15 -17   48.32   64.84
  -1 -15  17   74.19   36.07
   1  15 -17   11.66   19.91
   1 -15 -16   62.49   37.33
  -1 -15  16   77.20   49.83
   1  15 -16   42.30   26.34
   1 -15 -15   13.58   27.35
  -1 -15  15   72.22   35.15
   1  15 -15   15.62   21.44
   1 -15 -14  142.54   39.31
  -1 -15  14   57.29   88.13
   1  15 -14   10.30   25.64
   1 -15 -13  187.70   59.28
  -1 -15  13  358.30  141.25
   1  15 -13  156.66   53.20
   1 -15 -12   60.01   51.52
  -1 -15  12   29.20   57.35
   1  15 -12   29.21   11.50
   1 -15 -11  353.89   89.75
  -1 -15  11   57.72   63.60
   1  15 -11   81.96   55.38
   1 -15 -10 1358.09  286.19
  -1 -15  10 1178.13  399.96
   1  15 -10 1046.50  212.83
   1 -15  -9 1941.99  375.88
  -1 -15   9 1542.81  161.27
   1  15  -9 1212.34  203.35
   1 -15  -8   84.16   73.53
  -1 -15   8   71.06   54.25
   1  15  -8   44.17   25.94
   1 -15  -7  429.21  108.27
  -1 -15   7  173.63   81.44
   1 -15  -6  295.49  100.30
  -1 -15   6  156.94   66.43
   1 -15  -5  142.83   71.35
  -1 -15   5   54.23   60.90
   1 -15  -4  327.34  142.63
  -1 -15   4  367.41  120.78
   1 -15  -4  216.39   64.85
   1 -15  -3  194.09   75.71
  -1 -15   3  193.41   70.75
   1 -15  -3  127.49   26.92
  -1  15   3  122.07   27.49
   1 -15  -2 3484.47  574.48
  -1 -15   2 2956.20  187.14
   1 -15  -1  169.19   69.89
  -1 -15   1   47.38   44.77
   1 -15   0  818.04  374.52
  -1 -15   0  737.48  142.18
  -1 -15  -1   56.87   28.46
   1 -15   1   73.65   86.10
  -1 -15  -2 3189.88  203.95
   1 -15   2 2894.74  207.39
  -1 -15  -3  146.01   90.12
   1 -15   3  254.75  125.63
  -1 -15  -4  343.84   66.18
   1 -15   4  309.64  110.84
  -1 -15  -4  265.88   56.25
  -1 -15  -5  169.00   93.30
   1 -15   5  110.87   62.28
  -1  15  -5   91.32   25.40
  -1 -15  -6  299.13   89.17
   1 -15   6  404.24  230.42
  -1  15  -6  286.88   70.98
  -1 -15  -7  512.61  147.51
   1 -15   7  412.48   94.93
  -1  15  -7  202.72   47.21
  -1 -15  -8   62.29   45.27
   1 -15   8   70.06   54.25
  -1 -15  -9   83.85   90.30
   1 -15   9  184.40   55.05
  -1  15  -9  153.25   37.66
  -1 -15 -10   11.83   59.39
   1 -15  10   20.71   27.78
  -1  15 -10   23.40   19.93
  -1 -15 -11   70.99   44.61
   1 -15  11   57.00   42.39
  -1  15 -11   12.95   20.73
  -1 -15 -12 1186.20  249.49
   1 -15  12 1171.88  338.99
  -1  15 -12 1154.88  252.37
  -1 -15 -13  117.30   94.78
   1 -15  13  168.02   96.60
  -1  15 -13   57.51   29.88
  -1 -15 -14  110.88   96.35
   1 -15  14  122.26   67.48
  -1  15 -14   36.74   28.90
  -1 -15 -15   62.90   38.61
   1 -15  15   51.29   25.08
  -1  15 -15   24.24   21.32
  -1 -15 -16  251.41   85.20
   1 -15  16  302.45   86.60
  -1  15 -16   84.73   37.62
  -1 -15 -17   24.95   84.15
   1 -15  17   50.57   21.50
  -1  15 -17   16.78   34.31
  -1  15 -17   26.93   21.25
   1 -15  18   51.93   23.95
  -1  15 -18   29.88   15.99
  -1  15 -18   27.21   19.34
   1 -17 -17   92.32   51.11
  -1 -17  17   39.39   30.48
   1 -17 -16  275.65   78.72
  -1 -17  16  196.19   74.21
   1 -17 -15  105.02   53.75
  -1 -17  15   18.33   54.07
   1 -17 -14  133.90   58.25
  -1 -17  14  102.56   49.32
   1 -17 -13   27.97   50.33
  -1 -17  13   18.37   57.00
   1 -17 -12   87.09   61.32
  -1 -17  12   49.75   60.16
   1 -17 -11   34.80   60.51
  -1 -17  11   40.07   30.60
   1 -17 -10  722.10  105.43
  -1 -17  10  982.99  281.61
   1 -17  -9  263.61  129.86
  -1 -17   9  319.87  117.06
   1 -17  -8  761.86  168.67
  -1 -17   8  711.84  178.29
   1 -17  -7   46.31   44.01
  -1 -17   7   63.56   47.90
   1 -17  -6  441.84  169.93
  -1 -17   6  168.67   65.54
   1 -17  -5  109.45   61.79
  -1 -17   5    1.47   43.10
   1 -17  -4   78.51   61.64
  -1 -17   4   99.85   25.61
   1 -17  -3  132.11   87.51
  -1 -17   3   80.23   41.11
   1 -17  -2 1410.00  335.47
  -1 -17   2 1489.81  516.02
   1 -17  -1  255.88   86.27
  -1 -17   1  403.81  103.83
  -1 -17   0 4475.54  346.11
   1 -17   0 4262.54  379.22
  -1 -17  -1 4859.19  248.62
   1 -17   1 4771.43  349.36
  -1 -17  -2   68.18   61.88
   1 -17   2  210.46   97.98
  -1 -17  -3  146.74   52.33
   1 -17   3   84.63   70.87
  -1 -17  -4  228.75   69.82
   1 -17   4   72.99   45.97
  -1 -17  -5  419.15   94.93
   1 -17   5  347.85  176.47
  -1 -17  -6 1319.54  403.15
   1 -17   6 1146.43  292.32
  -1 -17  -7   52.08   45.69
   1 -17   7   34.27   59.44
  -1 -17  -8 1765.57  429.30
   1 -17   8 1592.86  383.52
  -1 -17  -9  -22.24   51.77
   1 -17   9   27.39   48.25
  -1 -17 -10  776.66  179.97
   1 -17  10  589.51  245.16
  -1 -17 -11   11.04   52.48
   1 -17  11   58.45   33.74
  -1 -17 -12   61.26   40.97
   1 -17  12   33.53   28.24
  -1 -17 -13  217.16   63.27
  -1 -17 -14   61.02   42.64
   1 -17  14   24.13   41.95
  -1 -17 -15   76.52   30.72
   1 -17  15    2.77   20.49
  -1 -17 -16  304.10   95.37
   1 -17  16   89.63   48.89
   1 -19 -15   33.78   44.27
  -1 -19  15   27.33   13.64
   1 -19 -14   96.46   65.45
  -1 -19  14  180.54   89.93
   1 -19 -13   28.03   45.21
  -1 -19  13   17.49   28.72
   1 -19 -12  299.54  121.04
  -1 -19  12  304.06   98.99
   1 -19 -11   80.61   66.96
  -1 -19  11  132.35   80.70
   1 -19 -10  793.59  303.94
  -1 -19  10 1009.01  290.04
   1 -19  -9  297.36   63.27
  -1 -19   9  315.86  158.28
   1 -19  -8   48.75   55.38
  -1 -19   8  221.02   76.48
   1 -19  -7  102.54   74.95
  -1 -19   7  187.97  118.48
   1 -19  -6  647.42  331.28
  -1 -19   6  866.78  248.94
   1 -19  -5   65.14   42.73
  -1 -19   5   76.32   34.60
   1 -19  -4 2547.00  641.76
  -1 -19   4 3312.60  283.19
   1 -19  -3   18.11   47.08
  -1 -19   3   81.69   36.83
   1 -19  -2 1204.97  320.58
  -1 -19   2  731.92  174.80
  -1 -19   1   65.78   46.03
   1 -19  -1  105.64   83.93
  -1 -19   0  168.86   71.20
   1 -19   0   40.96   33.71
   1 -19   1   76.67   37.31
  -1 -19  -1   81.28   37.92
  -1 -19  -2 1035.52  486.01
   1 -19   2 1148.06  405.00
  -1 -19  -3  471.70  107.81
   1 -19   3  433.99  167.58
  -1 -19  -4 2259.83  508.46
   1 -19   4 2006.00  490.19
  -1 -19  -5 1016.01  308.15
   1 -19   5 1154.32  304.25
  -1 -19  -6  499.63  139.62
   1 -19   6  355.74  116.82
  -1 -19  -7  720.52  233.60
   1 -19   7  740.77  195.11
  -1 -19  -8 1018.95  290.75
   1 -19   8 1450.79  372.67
  -1 -19  -9  116.37   61.92
   1 -19   9  153.01   98.73
  -1 -19 -10 1131.06  170.02
   1 -19  10  920.84  236.18
  -1 -19 -11   54.42   67.77
   1 -19  11   30.64   19.11
  -1 -19 -12  381.94  158.30
   1 -19  12   96.03   59.91
  -1 -19 -13   33.91   49.49
   1 -19  13   34.20   12.74
   1 -19  14  166.31   81.49
   1 -21 -13  167.61   63.35
  -1 -21  13  198.58   95.79
   1 -21 -12   53.60   43.80
  -1 -21  12   64.19   50.74
   1 -21 -11  241.47   90.81
  -1 -21  11  200.58   86.28
   1 -21 -10   85.04   72.04
  -1 -21  10  143.24   58.18
   1 -21  -9  512.12  193.01
  -1 -21   9  474.86  234.11
   1 -21  -8  227.71   90.64
  -1 -21   8   73.12   53.41
   1 -21  -7 1050.37  251.61
  -1 -21   7  509.54  227.89
   1 -21  -6  528.09  137.90
  -1 -21   6  576.24  195.12
   1 -21  -5 3684.61  983.45
  -1 -21   5 4258.06  315.36
   1 -21  -4  451.45  197.02
  -1 -21   4  393.44   66.72
   1 -21  -3 1268.20  237.31
  -1 -21   3  890.07  304.74
   1 -21  -2  135.97   44.90
  -1 -21   2  102.21   89.14
   1 -21  -1  977.51  200.64
  -1 -21   1  574.57  220.61
  -1 -21   0   19.99   63.24
   1 -21   0  127.41   93.85
   1 -21   1   53.25   65.62
  -1 -21  -1   21.08   39.76
  -1 -21  -2   -3.72   41.99
   1 -21   2   49.59   72.74
  -1 -21  -3 1124.39  695.00
   1 -21   3 1246.81  384.68
  -1 -21  -4  641.27  248.86
   1 -21   4  699.43  119.59
  -1 -21  -5 1150.72  378.49
   1 -21   5 1083.81  322.37
  -1 -21  -6   48.60   36.13
   1 -21   6   67.97   35.65
  -1 -21  -7 1336.34  338.25
   1 -21   7 1190.85  446.65
  -1 -21  -8   -7.45   41.37
   1 -21   8   32.76   25.48
  -1 -21  -9  763.31  225.62
   1 -21   9  679.72  148.20
  -1 -21 -10  141.38   62.02
   1 -21  10  114.57   87.01
  -1 -21 -11  307.86  129.06
   1 -21  11  406.63  273.23
  -1 -21 -12   16.23   48.80
   1 -21  12   13.47   29.14
   1 -23  -9   31.96   49.61
  -1 -23   9  126.35   73.81
   1 -23  -8   85.81   39.33
  -1 -23   8  120.50   74.41
   1 -23  -7  339.90  149.79
  -1 -23   7  145.40   50.97
   1 -23  -6   82.53   75.97
  -1 -23   6   73.18   46.99
   1 -23  -5  991.70  274.72
  -1 -23   5  456.59  150.69
   1 -23  -4   19.94   57.52
  -1 -23   4   22.89   14.03
   1 -23  -3  144.01   38.31
  -1 -23   3   98.76   66.19
   1 -23  -2  159.71   92.91
  -1 -23   2  181.24   83.48
   1 -23  -1  117.97   63.44
  -1 -23   1   92.62   57.20
   1 -23   0   57.76   33.80
  -1 -23   0   10.41   43.02
  -1 -23  -1  337.52  202.36
   1 -23   1  538.07  154.00
  -1 -23  -2   48.38   68.95
   1 -23   2   49.67   38.37
  -1 -23  -3   42.89   43.45
   1 -23   3   90.11   62.90
  -1 -23  -4  497.69  149.49
   1 -23   4  373.41  202.55
  -1 -23  -5  376.34  168.46
   1 -23   5  373.22  146.17
  -1 -23  -6   42.32   51.21
   1 -23   6   56.03   45.38
  -1 -23  -7  356.79  103.82
   1 -23   7  383.56  239.16
  -1 -23  -8    8.93   40.19
   1 -23   8   38.06   23.02
   2   0 -24   71.34   47.89
   2   0 -23   18.03   39.57
   2   0 -22   49.06   33.11
   2   0 -21   30.30   60.11
   2   0 -20 1632.20  333.99
   2   0 -19   40.04   42.08
   2   0 -18 5048.14  306.12
   2   0 -17   54.84   37.76
   2   0 -16 3173.25  463.17
   2   0 -15   40.60   33.79
   2   0 -1411389.90  901.64
   2   0 -13   70.30   56.24
  -2   0  11   76.78   75.98
   2   0 -11   11.45   11.27
  -2   0  10 1151.10  120.46
   2   0 -10 1017.96   82.87
  -2   0   9   13.49   29.28
  -2   0   9   23.19   14.19
   2   0  -9    8.07   11.54
   2   0  -8 8406.64  285.58
  -2   0   8 9376.83  328.23
  -2   0   8 8446.76  249.96
   2   0  -8 8792.27  247.13
   2   0  -7   32.08   26.84
  -2   0   7   13.94   34.83
  -2   0   7    4.33    4.07
   2   0  -7   -0.10    9.29
  -2   0   6  214.21   52.29
   2   0  -6  114.82   46.31
  -2   0   6  127.59   13.58
   2   0  -6  146.60   25.87
  -2   0   5   15.99   31.77
   2   0  -5   21.27   27.97
  -2   0   5    8.05    6.71
   2   0  -5   13.23    8.73
  -2   0   4 4504.85  141.77
   2   0  -4 4436.42  136.41
  -2   0   3  -30.68   30.68
   2   0  -3   42.62   27.23
   2   0  -3    2.84    5.23
   2   0   1   22.36   10.69
  -2   0  -1   35.40   17.16
   2   0   1   10.55   21.73
  -2   0  -1   -4.38   17.46
   2   0   1   16.94   28.46
  -2   0  -1   38.12   29.34
   2   0   1    6.09   16.38
   2   0   1   31.60   20.45
  -2   0  -1  -31.08   28.62
  -2   0  -289123.50  870.24
  -2   0  -286354.10  845.80
   2   0   287145.10  913.84
   2   0   285412.50  886.43
  -2   0  -288170.10  916.90
  -2   0  -3   17.19   16.40
  -2   0  -3   27.37   14.95
  -2   0  -3   37.11   28.97
   2   0   3  -61.87   34.79
   2   0   3   36.62   21.70
  -2   0  -3  -18.99  555.46
  -2   0  -4 1098.27  113.73
  -2   0  -4 1071.57   56.31
   2   0   4 1161.50   66.03
  -2   0  -4  945.63   66.83
   2   0   4 1007.15  101.38
  -2   0  -4 1224.46   70.12
  -2   0  -5   16.13   30.88
  -2   0  -5  -14.18   27.06
   2   0   5    9.66   21.98
  -2   0  -5   28.50   28.43
   2   0   5   45.70   40.93
  -2   0  -5   43.10   24.10
  -2   0  -611956.40  359.66
  -2   0  -611292.10  342.50
   2   0   611522.10  352.13
  -2   0  -612016.40  369.35
   2   0   611727.30  355.85
  -2   0  -612058.60  374.93
  -2   0  -7  -18.53   29.94
  -2   0  -7    5.93   19.86
   2   0   7   20.58    6.68
  -2   0  -7    6.83   26.11
   2   0   7   30.79   20.09
  -2   0  -7  -13.79   33.44
  -2   0  -823186.10  523.78
  -2   0  -820856.90  510.46
   2   0   821362.50  485.85
  -2   0  -823484.30  533.07
   2   0   821869.50  492.53
  -2   0  -821604.30  570.90
  -2   0  -9  -26.68   36.11
  -2   0  -9  -12.22   12.43
   2   0   9   13.63   15.61
  -2   0  -9   31.55   15.77
   2   0   9    5.75   16.43
  -2   0  -9   15.56   26.00
  -2   0 -10  906.65  164.80
  -2   0 -10  870.86  242.72
   2   0  10  380.93  137.39
  -2   0 -10  900.25  206.82
  -2   0 -11   50.10   54.87
  -2   0 -11  -16.69   28.10
  -2   0 -11   18.70   29.14
  -2   0 -12 9354.40  711.87
  -2   0 -12 8852.79  427.56
  -2   0 -12 8197.71  401.80
  -2   0 -13   18.12   23.97
  -2   0 -13   34.35   30.23
  -2   0 -13   25.86   19.79
  -2   0 -1434512.90  637.91
  -2   0 -15   46.40   43.24
  -2   0 -16  728.41  123.67
  -2   0 -17   48.43   29.21
  -2   0 -18  501.66  148.10
  -2   0 -19   45.81   54.98
  -2   0 -20  251.59  105.17
  -2   0 -21   57.08   45.28
  -2   0 -22   65.79   61.56
   2  -2 -24   61.71   70.32
   2   2 -24   15.04   30.36
   2  -2 -23  433.39  121.34
   2   2 -23  542.00  132.58
   2   2 -22   51.75   76.28
   2  -2 -21  345.55  118.41
   2   2 -21  422.76   93.73
   2  -2 -20 1249.77  277.24
   2   2 -20 1406.56  241.11
   2  -2 -19 1004.05  286.88
   2   2 -19  897.17  144.50
   2   2 -18   31.91   65.59
   2  -2 -18  -41.98   49.56
   2   2 -18   23.59   22.57
   2  -2 -17 2403.93  543.85
   2   2 -17 2200.67  184.24
   2  -2 -16  190.15   48.46
  -2  -2  16   56.82   56.78
  -2  -2  16   51.41   26.96
   2   2 -16   24.54   24.78
   2  -2 -15  492.16  107.33
  -2  -2  15  498.12  170.30
  -2  -2  15  309.99   81.46
   2   2 -15  344.12  118.86
   2  -2 -14 2636.25  467.23
   2   2 -14 2348.36  147.59
   2  -2 -13   97.60   43.24
  -2  -2  13   53.38   36.74
  -2  -2  13    2.33   12.53
   2  -2 -13   43.66   39.56
   2   2 -13   57.12   17.33
   2  -2 -12   45.84   54.63
  -2  -2  12  129.26   54.80
  -2  -2  12   92.36   37.17
   2  -2 -12   89.10   16.14
  -2   2  12   10.27   20.10
   2   2 -12  187.02   73.59
   2  -2 -11 4486.18  270.43
  -2  -2  11 4701.71  274.58
   2  -2 -11 4996.63  229.85
  -2  -2  11 4818.36  214.90
  -2   2  11 4440.70  191.63
   2   2 -11 4698.16  211.99
   2  -2 -10 1283.91  301.36
  -2  -2  10 1339.38  119.55
   2  -2 -10 1298.86   73.09
  -2   2  10 1134.05   64.97
   2   2 -10 1363.07  143.69
   2  -2  -9  160.32   59.83
  -2  -2   9   67.26   58.90
   2  -2  -9   58.81   28.10
  -2  -2   9  157.60   30.64
  -2   2   9  103.42   38.07
   2   2  -9  129.69   35.46
   2  -2  -8 6336.85  331.57
   2   2  -8 5829.93  304.99
  -2  -2   8 6502.94  331.46
   2  -2  -8 5798.86  282.20
  -2  -2   8 6284.71  288.97
  -2   2   8 6001.88  270.08
   2  -2  -7 2315.58  126.74
   2   2  -7 2110.17   98.67
  -2  -2   7 2322.69  125.53
   2  -2  -7 1979.03  113.50
  -2   2   7 2318.34  113.29
   2  -2  -6 3997.44  153.11
   2   2  -6 3796.64  278.29
  -2  -2   6 4412.67  272.33
   2  -2  -6 4049.16  148.32
  -2   2   536856.60  477.29
   2   2  -535649.70  461.03
  -2  -2   536637.50  478.17
   2  -2  -421257.90  329.07
  -2   2   420803.00  312.45
   2   2  -420684.40  300.03
  -2  -2   421384.80  312.05
   2  -2  -3 5255.60  163.63
  -2   2   3 5219.49  148.49
   2   2  -3 5106.10  146.15
  -2  -2   3 5353.26  154.40
  -2   2   287761.00  892.32
   2  -2  -289319.80  916.05
   2   2  -284172.00  869.65
  -2  -2   285957.80  878.70
   2  -2  -183189.00  835.43
  -2   2   183781.60  836.81
   2   2  -184699.60  853.78
  -2  -2   181414.40  824.90
   2   2   042348.80  459.89
  -2  -2   043852.80  474.22
   2   2   042580.50  450.43
  -2  -2   041646.90  442.25
   2  -2   042011.10  460.58
  -2  -2   042629.60  451.99
  -2   2   042099.70  465.45
   2  -2   041537.50  465.39
   2   2   043217.00  463.63
   2   2   1 5226.48  138.28
  -2  -2  -1 5177.06  135.45
  -2   2  -1 5194.26  126.74
   2  -2   1 5350.91  129.69
  -2   2  -1 5178.77  145.27
  -2  -2  -1 5371.94  155.13
   2  -2   1 5443.96  146.58
   2  -2   1 4928.34  144.12
   2  -2   1 5154.34  141.60
   2   2   1 5079.29  133.66
  -2   2  -1 5170.69  142.99
  -2  -2  -1 5126.22  157.31
   2  -2   229356.70  333.47
  -2   2  -230348.20  384.38
   2  -2   230239.00  386.32
   2   2   228728.50  358.00
   2  -2   228675.30  366.07
  -2   2  -229128.50  373.83
   2   2   3  776.45   49.36
  -2  -2  -3  832.25  157.74
  -2   2  -3  791.03   41.16
   2  -2   3  798.08   66.68
   2  -2   3  827.77  171.35
   2  -2   3  817.78  186.58
  -2   2  -3  829.46  155.53
   2   2   3  778.97   57.80
   2   2   4 1998.72   77.31
  -2  -2  -4 2049.67   80.18
  -2   2  -4 2086.00   75.40
   2  -2   4 2039.71   72.70
   2  -2   4 1945.38   85.67
   2  -2   4 2107.96   89.67
  -2   2  -4 1960.80  198.44
   2   2   4 1705.11  144.29
   2   2   5 2313.92  105.69
  -2  -2  -5 2103.64   87.95
  -2   2  -5 2195.95  101.88
   2  -2   5 2380.15   99.36
  -2  -2  -5 2533.46  109.52
   2  -2   5 2409.99  105.54
  -2   2  -5 2363.50  112.73
   2   2   5 2191.42   88.75
  -2  -2  -6  925.14  210.52
   2   2   6  608.66  186.77
  -2   2  -6  530.21  116.11
   2  -2   6  672.73  148.01
  -2  -2  -6  911.02  236.85
   2  -2   6  646.52  172.65
  -2   2  -6  760.56   99.50
   2   2   6  629.57   52.55
  -2  -2  -7 2302.93  138.63
  -2   2  -7 2374.01  131.88
   2  -2   7 2183.35   96.15
  -2  -2  -7 2163.00   94.06
  -2  -2  -7 2467.69  145.46
   2  -2   7 2162.39  106.95
  -2   2  -7 2205.65  104.50
   2   2   7 2121.47  157.31
  -2  -2  -8 2211.37  264.46
  -2   2  -8 1541.37  132.22
   2  -2   8 1962.69  107.22
  -2  -2  -8 1605.00   93.91
   2  -2   8 1971.64  101.46
  -2  -2  -8 2099.42  103.44
  -2   2  -8 1916.55  242.76
   2   2   8 1668.04   94.04
  -2  -2  -9   23.70   38.01
  -2   2  -9   13.36   14.69
   2  -2   9   20.30   27.63
   2  -2   9   13.86   16.26
  -2  -2  -9   29.60   31.71
  -2   2  -9   49.42   33.75
   2   2   9   24.29   16.06
  -2  -2 -10 2448.74  152.87
   2  -2  10 2477.49  256.96
   2   2  10 1941.86  100.95
  -2   2 -10 2125.96  119.27
  -2  -2 -11 6142.38  344.11
   2  -2  11 6407.92  270.71
  -2  -2 -11 5792.10  353.54
  -2   2 -11 6091.54  253.70
  -2  -2 -12 1529.26  312.71
   2  -2  12 1483.44  318.91
  -2  -2 -12 1230.10  235.29
  -2   2 -12 1312.05  340.56
  -2   2 -13  538.35   82.83
  -2  -2 -13  569.72  131.02
  -2  -2 -13  410.98  121.78
  -2   2 -13  503.30   93.59
  -2  -2 -14  455.07  142.38
  -2   2 -14  263.36   65.62
  -2  -2 -14  289.51   84.10
  -2   2 -14  347.86   74.63
  -2   2 -15 3447.70  599.98
  -2  -2 -15 3144.25  607.61
  -2  -2 -15 3641.77  203.60
  -2   2 -15 2894.39  265.95
  -2   2 -16  644.81  150.33
  -2  -2 -16  562.69   88.63
  -2  -2 -16  442.92   92.93
  -2   2 -16  281.69  111.49
  -2  -2 -17 2413.86  541.67
  -2   2 -17 2775.98  455.11
  -2  -2 -17 2372.47  285.69
  -2  -2 -18 4331.96  228.81
  -2   2 -18 4257.32  740.64
  -2   2 -19   44.42   47.83
  -2  -2 -19   38.19   34.34
  -2   2 -20 1119.67  271.46
  -2  -2 -20  896.10  283.02
  -2   2 -21  146.07   91.11
  -2  -2 -21  252.57   74.63
  -2   2 -22   51.19   33.66
  -2  -2 -22   22.71   37.85
   2   4 -24  167.32   56.74
   2  -4 -24   10.44   37.60
   2   4 -23  271.07  121.82
   2  -4 -23  409.67  138.22
   2   4 -22   64.33   58.41
   2  -4 -22   19.29   42.60
   2   4 -21  388.39   87.91
   2  -4 -21  243.21  144.11
   2  -4 -20  390.93   86.03
  -2  -4  20  417.14  132.73
   2  -4 -19 1186.00  219.71
  -2  -4  19 1182.45  182.29
   2  -4 -18  983.27  178.94
  -2  -4  18 1069.06  306.60
   2   4 -18  782.18  254.05
   2  -4 -17   65.41   46.26
  -2  -4  17   45.65   52.07
   2  -4 -17    9.29   11.86
   2   4 -17   11.33   12.28
   2  -4 -16  224.28   87.50
  -2  -4  16  117.78   45.72
   2  -4 -16   64.76   31.06
   2   4 -16  134.57   23.81
  -2   4  16   39.51   14.74
   2  -4 -15  320.79   92.70
  -2  -4  15  226.66   71.86
  -2   4  15   98.29   27.45
   2   4 -15  196.84   64.88
   2  -4 -14   58.20   52.93
  -2  -4  14   47.22   47.36
   2  -4 -14    4.29   14.34
  -2  -4  14    5.82   20.88
   2   4 -14   51.89   18.35
  -2   4  14   19.86   13.63
   2  -4 -13  648.11  135.33
   2  -4 -13  427.63   98.91
  -2  -4  13  286.99   74.21
  -2   4  13  338.17   74.51
   2   4 -13  518.38  136.79
   2  -4 -12   66.25   26.09
  -2  -4  12  104.12   40.14
   2  -4 -12  117.11   23.86
  -2  -4  12   33.13   35.24
   2   4 -12   66.83   48.17
  -2   4  12   63.51   33.10
   2  -4 -11 4394.42  240.61
  -2  -4  11 4313.99  202.20
   2  -4 -11 4331.66  179.66
  -2  -4  11 4483.60  251.67
  -2   4  11 4132.35  198.32
   2  -4 -10  218.25  107.40
  -2  -4  10  444.57   83.69
  -2   4  10  347.87   78.16
   2  -4  -9  966.01  245.63
  -2  -4   9  777.34  161.75
   2  -4  -8   54.76   31.78
  -2  -4   8   77.49   38.49
  -2   4   716098.90  523.93
   2  -4  -716732.60  506.76
   2   4  -716499.40  495.82
  -2  -4   718086.50  541.27
  -2   4   6 2442.64  148.99
   2  -4  -6 2597.48  177.14
   2   4  -6 2443.13  122.06
  -2  -4   6 2715.17  135.78
  -2   4   541542.30  547.37
   2  -4  -541986.50  565.10
   2   4  -540623.40  548.23
  -2  -4   542660.80  564.43
  -2   4   413955.50  252.46
   2  -4  -414697.60  369.66
  -2  -4   414442.30  377.65
   2   4  -414039.80  250.67
   2  -4  -3 2699.26  117.14
  -2   4   3 2801.72  137.92
  -2  -4   3 2835.32  143.49
   2   4  -3 2738.36  242.80
  -2   4   2111426.2 1155.42
   2  -4  -2112117.4 1167.49
   2   4  -2106348.7 1132.45
  -2  -4   2106257.1 1117.34
  -2   4   1 1153.37  166.65
   2  -4  -1 1058.70  126.41
  -2  -4   1 1069.99  116.77
   2   4  -1 1039.07   67.36
   2   4  -1 1004.61   33.05
   2  -4  -1  990.69   51.21
  -2   4   012423.60  206.30
   2   4   012876.40  301.85
  -2  -4   012485.00  218.99
   2  -4   012530.90  207.74
   2  -4   013006.30  193.21
  -2   4   012433.20  187.31
   2   4   012653.50  184.39
  -2   4   012489.00  190.41
  -2  -4  -1 3621.56  129.49
   2   4   1 3832.71  130.10
   2  -4   1 3863.42  122.94
  -2   4  -1 3538.36  113.98
  -2  -4  -1 3669.44  116.53
   2  -4   1 3717.67  114.67
   2  -4   1 4008.96  120.42
   2   4   1 3726.23  107.12
   2   4   239869.60  518.79
  -2  -4  -239976.80  501.21
  -2   4  -238676.40  464.00
   2  -4   239902.00  487.37
  -2   4  -239868.40  482.70
   2   4   239029.80  500.46
   2  -4   238295.50  466.27
  -2   4  -239359.40  475.04
   2   4   317558.50  331.25
  -2  -4  -316963.30  283.60
  -2   4  -316202.80  275.48
   2  -4   316686.00  262.34
  -2   4  -316362.70  265.49
   2  -4   317361.50  274.16
   2   4   4 2029.58   92.59
  -2  -4  -4 2173.69   97.01
  -2   4  -4 2144.58   82.78
   2  -4   4 2125.80  109.16
   2  -4   4 2002.33  193.82
   2   4   5   87.77   26.18
  -2  -4  -5   92.87   31.36
  -2   4  -5   56.04   37.34
   2  -4   5  111.56   41.01
   2  -4   5   69.41   42.80
   2  -4   5  132.59   41.07
   2   4   6 1439.34  289.11
  -2  -4  -6 1577.52   98.47
  -2   4  -6 1467.65   75.41
   2  -4   6 1531.91   82.66
   2  -4   6 1519.77   89.79
   2   4   7  287.94   78.10
  -2  -4  -7  563.28  168.78
  -2   4  -7  303.03   95.51
   2  -4   7  571.26   70.03
   2  -4   7  366.87   91.18
  -2   4  -7  483.25  121.36
   2   4   7  453.08  143.57
  -2  -4  -8 7242.70  426.52
  -2   4  -8 6898.07  312.30
   2  -4   8 6971.47  330.53
  -2  -4  -8 7512.20  394.68
  -2   4  -8 6819.38  320.82
   2   4   8 6631.08  300.54
  -2  -4  -9 1837.58  222.55
   2  -4   9 1660.32  104.52
  -2  -4  -9 2007.01  120.71
  -2   4  -9 1920.84  109.81
   2   4   9 1457.71  151.95
  -2  -4 -10  424.07   59.74
   2  -4  10  564.08  112.35
  -2  -4 -10  347.95  105.18
  -2   4 -10  299.84  156.79
  -2  -4 -11 8226.21  376.86
   2  -4  11 8571.59  342.76
  -2  -4 -11 8730.67  386.75
  -2   4 -11 8190.82  331.34
  -2  -4 -12  -16.88   42.51
   2  -4  12   61.77   33.24
  -2  -4 -12   26.98   38.62
  -2   4 -12   47.32   28.30
  -2  -4 -13  354.88   79.16
   2  -4  13  461.42  178.99
  -2  -4 -13  354.58   80.13
  -2   4 -13  197.32   91.25
  -2  -4 -14   -4.84   43.18
  -2  -4 -14   20.34   20.12
  -2   4 -14   80.02   46.29
  -2  -4 -15 1655.11  257.76
   2  -4  15 1278.11  342.23
  -2  -4 -15 1389.62  132.20
  -2  -4 -16   52.83   47.25
   2  -4  16   40.91   24.26
  -2  -4 -16   29.02   25.49
  -2   4 -17 2459.41  457.04
  -2  -4 -17 2179.95  449.20
  -2  -4 -17 2422.59  232.56
  -2   4 -17 2309.57  348.24
  -2   4 -18  508.61  113.07
  -2  -4 -18  375.88  114.79
  -2  -4 -18  260.02   60.96
  -2   4 -18  209.45   88.47
  -2   4 -19  330.05   92.95
  -2  -4 -19   64.88   48.61
  -2   4 -20   46.62   23.70
  -2  -4 -20   52.76   52.04
  -2   4 -21   78.59   47.50
  -2  -4 -21   49.68   46.80
  -2   4 -22  242.34   81.39
  -2  -4 -22  132.59   75.71
   2   6 -24  161.25  111.91
   2  -6 -24   50.66   52.04
   2   6 -23  419.81   89.80
   2  -6 -23   33.49   61.73
   2  -6 -22   28.32   32.68
  -2  -6  22   79.21   48.10
   2  -6 -21   28.82   39.23
   2  -6 -20  137.56   37.97
  -2  -6  20   49.04   44.28
   2  -6 -19  285.18   95.92
  -2  -6  19  143.70   60.28
   2  -6 -18  622.76  116.53
  -2  -6  18  494.32  151.50
   2   6 -18  376.18  122.62
   2  -6 -17  -29.20   49.20
  -2  -6  17   78.10   65.68
   2  -6 -17   18.15   12.42
   2   6 -17   18.27   28.34
   2  -6 -16 3808.92  767.66
  -2  -6  16 3452.46  314.54
   2  -6 -16 3573.73  240.84
   2   6 -16 3717.66  195.69
   2  -6 -15   65.82   70.20
  -2  -6  15   32.09   35.62
   2  -6 -15   60.72   25.88
   2   6 -15   16.82   27.97
  -2   6  15    3.61    9.33
   2  -6 -14 1470.48  308.36
  -2  -6  14 1409.78  134.59
   2  -6 -14 1220.82  137.63
  -2   6  14  936.34  151.30
   2  -6 -13   68.64   35.79
  -2  -6  13   40.10   28.35
  -2   6  13   10.59   10.71
   2  -6 -12  548.90   94.87
  -2   6  12  484.24  100.26
   2  -6 -11  148.83   67.93
  -2  -6  11  127.54   51.08
   2  -6 -10  538.19   88.67
  -2  -6  10  740.70  154.19
   2  -6  -9 1487.56  256.82
  -2  -6   9 1164.84  251.67
   2  -6  -8  317.98  158.89
  -2  -6   8  321.93   78.59
   2  -6  -7  100.33   73.07
  -2  -6   7   91.27   48.71
   2  -6  -615944.20  496.27
  -2  -6   615806.20  489.79
   2  -6  -5 6095.96  381.61
  -2   6   5 5604.48  273.43
  -2  -6   5 6033.52  295.04
   2   6  -5 5788.42  278.58
   2  -6  -4 4361.14  173.52
  -2   6   4 4197.79  194.80
   2   6  -4 4099.99  297.02
  -2  -6   4 4541.31  225.56
  -2   6   3 1465.64  103.68
   2  -6  -3 1426.72  157.31
   2   6  -3 1361.65   80.66
  -2  -6   3 1585.29  101.86
  -2   6   2 1602.45  111.19
   2  -6  -2 1473.05  134.21
  -2  -6   2 1514.26   94.05
   2   6  -2 1584.61   95.36
  -2   6   1 3704.82  152.19
   2  -6  -1 3364.28  135.47
   2   6  -1 3586.61  141.47
  -2  -6   1 3944.36  160.50
   2  -6  -1 3404.84  104.87
   2   6   0 8931.10  267.05
  -2   6   0 9201.98  305.67
  -2  -6   0 9731.25  277.33
   2  -6   0 9792.88  268.78
   2  -6   0 9507.78  228.11
  -2   6   0 9781.32  256.96
   2   6   0 9585.32  204.36
  -2   6  -1  369.78  121.10
   2   6   1  394.47   71.16
   2  -6   1  421.90  119.07
  -2  -6  -1  560.94  135.28
   2  -6   1  330.45   71.52
  -2  -6  -1  383.94   64.49
  -2   6  -1  371.43   67.43
   2  -6   1  368.51  115.53
  -2   6  -1  394.20   81.09
   2   6   1  353.19   63.65
   2   6   2  456.02  101.57
  -2  -6  -2  613.75  150.18
   2  -6   2  518.60  153.79
  -2   6  -2  603.14  120.77
  -2   6  -2  597.09  120.30
   2  -6   2  421.01  100.44
  -2   6  -2  479.04  101.13
   2   6   2  475.27   96.82
   2   6   3 2027.85   98.61
  -2  -6  -3 2004.21  120.50
  -2   6  -3 1972.02   89.24
   2  -6   3 2077.70   97.54
  -2   6  -3 2025.10   89.71
   2  -6   3 1755.88  110.26
   2   6   411007.70  375.18
  -2  -6  -411613.60  373.75
  -2   6  -411265.00  347.91
   2  -6   412271.60  438.35
  -2   6  -411183.10  346.49
   2  -6   411192.80  343.69
   2   6   521849.10  709.90
  -2  -6  -523498.00  682.23
  -2   6  -522497.60  639.28
   2  -6   523402.90  667.49
  -2   6  -523579.60  676.48
   2  -6   521850.70  629.57
  -2  -6  -6 1636.55  140.96
  -2   6  -6 1399.88   94.61
   2  -6   6 1789.99  148.66
   2  -6   6 1231.06  280.02
  -2  -6  -7 3583.63  256.16
  -2   6  -7 2903.68  184.99
   2  -6   7 3322.99  251.19
  -2  -6  -8 3823.18  189.20
   2  -6   8 3913.95  174.20
  -2  -6  -9  943.19  215.59
   2  -6   9 1052.64  261.51
  -2  -6 -10 1710.10  299.64
   2  -6  10 1678.86  123.43
  -2   6 -10 1592.58  158.65
  -2  -6 -11 1806.95  299.71
   2  -6  11 1985.35  126.90
  -2  -6 -11 1995.00  128.08
  -2   6 -11 2010.18  186.87
  -2  -6 -12 2927.27  173.39
   2  -6  12 2982.27  248.25
  -2  -6 -12 3073.04  154.00
  -2   6 -12 2840.84  148.25
  -2  -6 -13  398.86  101.60
  -2  -6 -13  451.99   73.15
  -2  -6 -14  919.32  229.50
   2  -6  14  879.22  284.39
  -2  -6 -14  728.76  159.41
  -2  -6 -15  540.00  160.13
   2  -6  15  689.73  244.31
  -2  -6 -15  573.63  121.69
  -2   6 -15  538.65  152.10
  -2  -6 -16   93.68   69.53
   2  -6  16  417.03  127.98
  -2  -6 -16  339.39  121.72
  -2   6 -16  305.26   97.21
  -2  -6 -17   91.13   74.23
   2  -6  17   29.01   31.44
  -2  -6 -17   38.45   34.57
  -2   6 -17   21.77   22.06
  -2  -6 -18  696.75  171.07
   2  -6  18  574.50  187.00
  -2  -6 -18  606.78  164.19
  -2   6 -18  589.93  141.94
  -2  -6 -19  263.99   72.24
  -2   6 -19  241.47   85.39
  -2   6 -20  132.35   50.27
  -2  -6 -20   27.66   44.34
  -2   6 -21  153.56   67.77
  -2  -6 -21   85.37   27.09
  -2   6 -22   50.79   32.61
  -2  -6 -22    9.92   25.92
   2  -8 -23   52.93   43.27
  -2  -8  23   32.23   32.58
   2  -8 -22   79.06   48.53
  -2  -8  22   46.20   50.39
   2  -8 -21   91.22   35.14
  -2  -8  21   36.79   34.38
   2  -8 -20  270.52   84.15
  -2  -8  20  230.61  134.03
   2  -8 -19  128.49   62.68
  -2  -8  19   28.06   50.90
   2  -8 -18  389.80  157.86
  -2  -8  18  329.02   86.97
   2  -8 -17  136.08   57.71
  -2  -8  17  256.95   86.99
   2  -8 -17  182.05   60.91
   2  -8 -16  112.14   68.06
  -2  -8  16   85.67   53.06
   2  -8 -16   23.92   29.35
   2   8 -16   18.41   31.15
   2  -8 -15  333.76  129.64
  -2  -8  15  142.32   71.70
   2  -8 -14  482.03  120.62
  -2  -8  14  499.50  108.10
   2  -8 -13   94.05   44.29
  -2  -8  13   57.58   35.22
   2  -8 -12  177.59   53.57
  -2  -8  12  232.38   98.07
   2  -8 -11  552.57  241.61
   2  -8 -10  655.69  265.26
  -2  -8  10  865.02  158.82
   2  -8  -9 1478.36  268.44
  -2  -8   9 1210.44  308.57
   2  -8  -8  701.43  102.80
  -2  -8   8  724.80  188.32
   2  -8  -7 1741.46  378.54
  -2  -8   7 1491.10  346.29
   2  -8  -6 1003.24  261.99
  -2  -8   6  977.86  266.69
   2  -8  -5  610.53  149.72
  -2  -8   5  684.11  163.47
   2  -8  -4 2417.49  258.88
  -2  -8   4 2227.12  145.36
   2  -8  -3   88.27   53.04
  -2  -8   3   30.54   56.37
  -2   8   2  186.41   45.51
   2  -8  -2  303.15   82.69
  -2  -8   2  197.22  134.03
  -2   8   1  992.33  209.48
   2  -8  -1 1211.28   98.22
  -2  -8   1 1221.95  108.37
   2  -8  -1 1217.49   78.68
  -2   8   1 1123.59   78.49
  -2   8   0 2463.81  300.14
  -2  -8   0 2595.26  166.89
   2  -8   0 2684.45  168.58
   2  -8   0 2454.52  170.25
  -2   8   0 2480.05  144.78
  -2   8  -1  213.22   80.02
  -2  -8  -1  122.18   67.54
   2  -8   1  167.49   27.45
  -2  -8  -1  162.82   23.48
  -2   8  -1  223.82   35.84
   2   8   1  249.90   24.91
  -2   8  -1  232.04   41.72
  -2   8  -2 1274.22  263.44
  -2  -8  -2 1561.13  114.90
   2  -8   2 1313.93  106.12
  -2   8  -2 1333.66  117.21
   2  -8   2 1322.11  128.24
   2   8   2 1273.18   59.50
  -2  -8  -3 1986.36  136.15
  -2   8  -3 1617.66  106.75
   2  -8   3 2056.26  197.37
  -2   8  -3 1809.81  106.76
   2  -8   3 1661.77  148.78
  -2  -8  -4 6354.16  444.47
   2  -8   4 6200.25  296.58
  -2   8  -4 6019.38  273.48
   2  -8   4 5889.85  264.18
  -2  -8  -5 6959.95  336.12
   2  -8   5 7652.18  251.65
  -2   8  -5 7374.03  303.87
   2  -8   5 6777.73  311.29
  -2  -8  -6 2023.55  289.35
   2  -8   6 1902.48  134.01
  -2   8  -6 1685.30  139.12
   2  -8   6 1515.03  102.91
  -2  -8  -7  411.81  159.31
   2  -8   7  438.79   95.28
  -2   8  -7  453.56  100.62
  -2  -8  -8 2888.90  215.42
   2  -8   8 2948.83  208.59
  -2  -8  -9  -13.19   45.01
   2  -8   9   43.06   40.95
  -2  -8 -10   33.56   26.32
   2  -8  10  162.99   46.95
  -2  -8 -11  226.37   83.76
   2  -8  11  102.97   44.98
  -2  -8 -12 2484.08  375.00
  -2   8 -12 2165.78  459.64
  -2  -8 -13  172.66   70.26
   2  -8  13  162.46   96.25
  -2  -8 -13  189.65   41.42
  -2  -8 -14 2569.16  535.52
   2  -8  14 3321.32  178.08
  -2  -8 -14 3094.62  339.83
  -2   8 -14 3066.35  378.18
  -2  -8 -15  179.89   83.92
   2  -8  15  144.40   62.32
  -2  -8 -15  123.71   35.24
  -2   8 -15   72.65   44.80
  -2  -8 -16  193.78   93.97
   2  -8  16  117.11   94.29
  -2  -8 -16   97.26   42.28
  -2   8 -16   59.83   41.65
  -2  -8 -17  386.91  126.61
   2  -8  17  393.11   74.98
  -2  -8 -17  490.03  116.93
  -2   8 -17  387.47   87.04
  -2  -8 -18   31.44   54.27
   2  -8  18   57.73   41.49
  -2   8 -18   69.83   59.89
  -2  -8 -19  338.19  103.37
   2  -8  19  495.57  186.44
  -2   8 -19  285.40  113.89
  -2  -8 -20  102.96   53.20
   2  -8  20   17.29   25.22
  -2  -8 -21   67.69   54.48
   2  -8  21   15.38   17.01
   2 -10 -22   79.68   77.20
  -2 -10  22   45.24   37.25
   2 -10 -21   58.19   69.31
  -2 -10  21   82.36   69.66
   2 -10 -20  539.33  155.19
  -2 -10  20  406.81  174.62
   2 -10 -19  306.76  107.70
  -2 -10  19  297.87   75.27
   2  10 -19  150.44   59.57
   2 -10 -18   97.66   62.22
  -2 -10  18   97.66   49.29
   2  10 -18   38.14   21.03
   2 -10 -17 2231.39  528.03
  -2 -10  17 2252.34  206.17
   2 -10 -17 1549.72  173.48
   2 -10 -16  131.48   61.01
  -2 -10  16  116.65   56.78
   2 -10 -15  733.57  191.52
  -2 -10  15  437.99  133.20
   2 -10 -14  986.99  204.56
  -2 -10  14  803.59  305.64
   2 -10 -13  423.13   99.92
  -2 -10  13  338.50   75.46
   2 -10 -12   15.28   59.87
  -2 -10  12   -6.94   41.12
   2 -10 -11  105.17   82.02
  -2 -10  11  149.81   47.23
   2 -10 -10  610.46  176.97
  -2 -10  10  583.93  149.32
   2 -10  -9   82.07   64.15
   2 -10  -8 1255.10  337.96
  -2 -10   7  379.27   92.88
   2 -10  -6 1140.59  290.53
  -2 -10   6 1197.84  290.27
   2 -10  -5 7910.62  412.15
  -2 -10   5 7818.05  366.88
  -2 -10   5 6996.15  236.93
   2 -10  -4 8466.96  290.18
  -2 -10   4 8846.50  336.03
  -2 -10   4 8082.71  179.43
   2 -10  -3 1963.69  138.22
  -2 -10   3 2156.44  138.13
   2 -10  -2 3910.07  224.79
  -2 -10   2 4021.49  247.81
   2 -10  -2 3427.45  159.95
  -2 -10   1 1510.40  297.64
   2 -10  -1 1470.44  323.99
  -2  10   1 1208.44   89.37
  -2 -10   0  841.67  207.47
   2 -10   0  809.27  192.96
   2 -10   0  700.60   73.37
  -2  10   0  742.70  136.99
  -2 -10  -1 6122.11  320.75
   2 -10   1 5933.66  300.49
  -2 -10  -1 5962.94  247.52
   2  10   1 6223.99  243.90
  -2  10  -1 6489.08  281.65
   2 -10   2 1546.45  115.49
  -2 -10  -2 1441.23  296.18
  -2 -10  -2 1248.09   67.93
  -2  10  -2 1332.62  110.74
   2  10   2 1245.15   98.33
  -2 -10  -3 9247.85  375.98
   2 -10   3 8789.72  377.71
  -2  10  -3 8884.27  335.60
   2 -10   3 8687.74  301.71
   2  10   3 8391.13  373.16
  -2 -10  -4 3544.67  192.37
   2 -10   4 3168.49  165.91
  -2  10  -4 3490.78  144.23
   2 -10   4 2993.08  124.09
  -2 -10  -5 1549.40  365.70
   2 -10   5 1478.82  127.44
  -2  10  -5 1365.23  145.01
   2 -10   5 1013.63  117.75
  -2 -10  -6  338.50   72.41
   2 -10   6  401.29   79.79
  -2  10  -6  357.07   70.47
   2 -10   6  162.49   58.74
  -2 -10  -7   54.40   74.86
   2 -10   7   96.14   37.17
  -2  10  -7   74.16   35.69
  -2 -10  -8 2959.28  224.04
   2 -10   8 2819.33  190.13
  -2  10  -8 2738.82  189.42
  -2 -10  -9 3583.53  231.63
  -2  10  -9 3633.62  214.97
  -2 -10 -10  153.25   63.64
  -2  10 -10  282.26   65.46
  -2 -10 -11 3171.09  266.12
   2 -10  11 2593.95  218.30
  -2  10 -11 2853.56  146.41
  -2 -10 -12   35.93   25.99
   2 -10  12   42.38   50.75
  -2 -10 -13   -2.26   43.95
   2 -10  13   25.36   21.17
  -2 -10 -14  482.57  193.29
   2 -10  14  389.90   97.39
  -2  10 -14  367.05   93.17
  -2 -10 -15  232.60   89.37
   2 -10  15   69.21   85.07
  -2 -10 -15   91.04   36.86
  -2  10 -15  118.78   43.64
  -2 -10 -16   21.49   31.88
   2 -10  16   29.00   18.84
  -2 -10 -16   33.71   26.08
  -2  10 -16    7.54   29.55
  -2 -10 -17  216.37   91.09
   2 -10  17  291.36  173.58
  -2 -10 -17  255.08  140.31
  -2  10 -17  230.46   75.09
  -2 -10 -18   92.49   86.18
   2 -10  18   65.96   33.13
  -2 -10 -19   23.29   30.71
   2 -10  19   12.62   17.18
  -2  10 -19   23.92   26.89
  -2 -10 -20   33.12   31.66
   2 -10  20   31.91   17.15
  -2  10 -20   23.27   29.54
   2 -12 -21   81.55   63.68
  -2 -12  21   51.95   24.66
   2 -12 -20  145.62   54.33
  -2 -12  20   22.60   22.35
   2 -12 -19  405.48  116.00
  -2 -12  19   96.30   59.21
   2  12 -19  171.29   84.07
   2 -12 -18   42.10   41.41
  -2 -12  18   72.56   43.57
   2 -12 -17  773.72  280.31
  -2 -12  17  977.48  173.20
   2 -12 -16   27.60   51.94
  -2 -12  16   32.03   41.41
   2 -12 -15  379.26  116.23
  -2 -12  15  588.37  127.45
   2 -12 -14   13.73   54.17
  -2 -12  14   57.19   42.70
   2 -12 -13 2542.26  357.07
  -2 -12  13 3002.68  478.72
   2 -12 -12 2071.03  300.85
  -2 -12  12 1476.23  405.93
   2 -12 -11 4829.92  326.32
  -2 -12  11 5342.24  318.00
   2 -12 -10  564.18  119.67
  -2 -12  10  610.52  135.40
   2 -12  -9  108.56   37.56
  -2 -12   9   23.59   46.68
   2 -12  -8   66.42   77.88
  -2 -12   8   82.20   42.98
  -2 -12   8   18.02    7.08
   2 -12  -7 3729.92  240.15
  -2 -12   7 3463.16  349.55
  -2 -12   7 2978.17  165.13
   2 -12  -6  107.62   52.14
  -2 -12   6   74.73   44.97
   2  12  -6   71.99   23.69
  -2 -12   6   21.73   11.93
   2 -12  -5 2554.09  524.61
  -2 -12   5 2298.07  338.63
  -2 -12   5 1994.30   91.04
   2 -12  -3  435.14   93.83
   2 -12  -2 7046.33  232.74
  -2  12   2 7064.04  251.81
   2 -12  -130139.40  867.69
  -2  12   130094.30  876.41
   2 -12   0 4702.10  328.86
  -2  12   0 4376.58  284.51
   2 -12   1 4679.85  325.78
   2 -12   2 2103.13  150.04
  -2 -12  -2 2043.66  158.78
  -2 -12  -2 1669.88   59.29
   2  12   2 1761.86   50.58
  -2 -12  -3  190.89   78.89
   2 -12   3    2.16   51.36
  -2 -12  -3   97.18   17.01
  -2  12  -3   55.78   31.72
   2  12   3   31.19   17.62
  -2 -12  -4   84.87   79.79
   2 -12   4  158.63   68.85
  -2  12  -4  197.86   41.20
   2 -12   4  145.62   32.66
   2  12   4   79.72   29.71
  -2 -12  -5 8448.25  522.39
  -2  12  -5 7712.55  357.63
   2 -12   5 6746.51  311.82
   2  12   5 7587.79  343.79
  -2 -12  -6 5550.80  319.15
  -2  12  -6 5179.70  408.07
  -2 -12  -7  436.13   88.60
   2 -12   7  321.07   84.14
  -2  12  -7  378.10   94.64
  -2 -12  -8  190.29   70.32
   2 -12   8  200.34   95.95
  -2  12  -8  259.90   61.72
  -2 -12  -9  151.65   84.72
   2 -12   9   26.90   31.62
  -2  12  -9   27.69   22.22
  -2 -12 -10  226.44   83.86
   2 -12  10  245.27  113.86
  -2  12 -10  220.91   41.02
  -2 -12 -11 2062.59  299.25
   2 -12  11 1874.84  178.51
  -2  12 -11 1578.40  290.77
  -2 -12 -12  187.66   67.31
   2 -12  12   26.59   41.02
  -2  12 -12   35.57   35.88
  -2 -12 -13  107.68   53.51
   2 -12  13  180.54  102.93
  -2  12 -13  289.10   72.62
  -2 -12 -14  478.09  115.22
   2 -12  14  397.11   80.79
  -2  12 -14  258.92   85.24
  -2 -12 -15 1972.51  405.35
   2 -12  15 1509.98  520.65
  -2  12 -15 1594.81  226.43
  -2  12 -15 1419.30  414.54
  -2 -12 -16  120.41   66.08
   2 -12  16   34.86   26.79
  -2  12 -16   52.54   22.08
  -2 -12 -16   44.33   29.43
  -2  12 -16   37.82   23.08
   2 -12  17  635.04  211.71
  -2  12 -17  974.25  166.25
  -2 -12 -17  427.03  146.66
  -2  12 -17  363.45  140.61
  -2 -12 -18   54.70   31.42
   2 -12  18    3.03   20.55
  -2  12 -18   48.32   23.73
  -2  12 -18   22.00   40.35
  -2 -12 -19   76.42   61.71
   2 -12  19    3.09   27.57
  -2  12 -19   60.55   22.79
  -2  12 -19   36.46   18.48
   2 -14 -20   43.45   48.69
  -2 -14  20   21.41   33.35
   2 -14 -19   45.26   46.40
  -2 -14  19  134.06   43.55
   2 -14 -18   60.80   77.07
  -2 -14  18  107.70   56.09
   2 -14 -17  519.62  137.20
  -2 -14  17  354.96   95.78
   2 -14 -16 1954.86  440.68
  -2 -14  16 2418.18  585.54
   2 -14 -15  829.49  289.01
  -2 -14  15  801.89  204.59
   2 -14 -14 5803.35  811.10
  -2 -14  14 6312.60  307.71
   2 -14 -13   84.76   79.07
  -2 -14  13   81.19   44.83
   2 -14 -12   56.90   65.22
  -2 -14  12   18.45   37.29
   2 -14 -11  108.17   99.06
  -2 -14  11   36.17   30.29
   2 -14 -10   60.94   85.83
  -2 -14  10   97.47   36.43
   2  14 -10   39.32   21.79
   2 -14  -9   45.33   63.10
  -2 -14   9   -8.46   54.57
   2  14  -9   25.76   21.02
   2 -14  -8 3950.02  367.00
  -2 -14   8 4358.85  290.10
   2  14  -8 3705.78  204.38
  -2 -14   8 3121.96  161.46
   2 -14  -7  243.85   62.31
  -2 -14   7  110.28   71.87
   2  14  -7  146.62   31.48
  -2 -14   7   93.60   16.61
   2 -14  -6 1577.46  394.71
  -2 -14   6 1263.50  288.81
  -2 -14   6 1129.51   89.96
   2 -14  -5  684.42  211.20
  -2 -14   5  674.26  362.51
   2 -14  -415423.30  732.58
  -2 -14   415938.50  749.22
   2 -14  -3  645.27  156.27
  -2 -14   3  764.49  143.80
   2 -14  -3  314.55   86.79
  -2  14   3  434.55  119.82
  -2 -14   2 4794.58  487.34
   2 -14  -2 5002.01  506.27
   2 -14  -2 4196.18  148.72
  -2  14   2 4372.70  221.54
  -2 -14   1   54.55   69.12
   2 -14  -1   84.56   82.42
  -2  14   1   32.45   12.53
   2 -14   0   72.61   25.94
  -2 -14   0   63.89   62.15
  -2 -14  -1 3547.51  347.00
   2 -14   1 3200.47  254.66
   2 -14   210575.60  589.55
  -2 -14  -211660.50  582.42
  -2 -14  -3  984.88  491.77
   2 -14   3 1190.76  273.01
  -2 -14  -3  891.35   89.83
   2  14   3  817.93  104.82
  -2 -14  -4 1923.38  430.76
   2 -14   4 1849.27  432.30
  -2 -14  -4 1335.26  153.84
  -2  14  -4 1583.09   84.01
   2  14   4 1262.37  155.67
  -2 -14  -5  351.73   48.79
   2 -14   5  191.21  125.73
  -2  14  -5  257.35   63.95
   2 -14   5  138.89   41.13
   2  14   5  210.85   63.29
  -2 -14  -6  226.67   71.18
   2 -14   6  284.96   93.88
  -2  14  -6  271.40   58.45
   2 -14   6  114.36   48.03
  -2 -14  -7   54.18   32.33
   2 -14   7   48.67   64.10
  -2  14  -7    4.38   23.26
  -2 -14  -8  595.82  207.56
   2 -14   8  775.54  266.97
  -2  14  -8  650.45  118.99
  -2 -14  -9   92.04   74.04
   2 -14   9    5.60   34.33
  -2  14  -9   30.14   19.40
  -2 -14 -10   41.60   83.77
   2 -14  10   70.41   51.84
  -2 -14 -11   38.71   33.94
   2 -14  11   50.33   27.25
  -2  14 -11   13.83   31.30
  -2 -14 -12 1936.94  422.53
   2 -14  12 1566.24  516.95
  -2  14 -12 2035.43  264.12
  -2 -14 -13  113.44   68.40
   2 -14  13   54.76   48.61
  -2  14 -13   22.77   22.01
  -2 -14 -14 3596.41  888.45
   2 -14  14 3941.75  415.95
  -2  14 -14 3440.56  509.25
  -2 -14 -15   81.99   53.03
   2 -14  15   26.34   29.74
  -2  14 -15    5.95   29.99
  -2 -14 -16  242.90   76.53
   2 -14  16  347.38   89.25
  -2  14 -16  296.36   68.97
  -2  14 -16  273.21   88.08
  -2 -14 -17   60.04   28.37
   2 -14  17   58.87   32.06
  -2  14 -17   72.27   37.19
  -2  14 -17    9.77   22.90
  -2 -14 -18  283.34  116.19
   2 -14  18   60.63   46.10
  -2  14 -18  152.60   57.86
  -2  14 -18   28.08   15.34
  -2 -16  19   39.57   35.02
   2 -16 -18  171.23   99.16
  -2 -16  18  313.44  111.50
   2 -16 -17  313.26   96.14
  -2 -16  17  224.29   72.62
   2 -16 -16  431.00  157.49
  -2 -16  16  401.85  127.69
   2 -16 -15  303.75   95.75
  -2 -16  15  160.93   87.46
   2 -16 -14  691.31  117.72
  -2 -16  14  486.48  158.81
   2 -16 -13   77.88   71.13
  -2 -16  13    1.33   36.43
   2  16 -13    5.16   14.51
   2 -16 -12  487.08  117.68
  -2 -16  12  342.65   77.58
   2  16 -12  182.86   31.29
   2 -16 -11  200.54  148.60
  -2 -16  11  394.87   93.72
   2  16 -11  178.24   39.13
   2 -16 -10  300.31   65.74
  -2 -16  10  159.85   89.95
   2 -16  -9  165.65   82.85
  -2 -16   9  135.48   55.69
   2  16  -9   89.48   26.01
   2 -16  -8   99.44   74.02
  -2 -16   8   84.74   35.80
   2 -16  -7  124.60   73.21
  -2 -16   7   36.96   41.09
   2 -16  -6 1873.76  184.87
  -2 -16   6 1688.97  418.54
   2 -16  -5 2048.69  496.67
  -2 -16   5 1791.39  588.22
   2 -16  -4 3672.76  723.00
  -2 -16   4 4160.07  334.63
   2 -16  -3 1143.17  247.75
  -2 -16   3 1183.65  340.76
  -2  16   3 1180.54   46.84
   2 -16  -2 3477.31  298.70
  -2 -16   2 3317.71  262.77
  -2 -16   1 1468.01  379.15
   2 -16  -1 1806.25  265.84
  -2 -16   0 2116.12  473.60
   2 -16   0 1777.67  485.24
   2 -16   1 1261.14  306.92
  -2 -16  -1 1211.24  300.41
  -2 -16  -2 2000.17  471.39
   2 -16   2 1948.95  219.23
  -2 -16  -3 1179.56  267.75
   2 -16   3 1091.78  226.85
  -2 -16  -4  339.33   99.23
   2 -16   4  459.17  171.85
  -2 -16  -5  134.65   61.47
   2 -16   5   53.33   64.66
  -2 -16  -6   71.12   63.24
   2 -16   6  144.50   89.40
  -2  16  -6   89.77   29.23
  -2 -16  -7   51.69   40.50
   2 -16   7  -44.70   34.48
  -2  16  -7    8.02   13.39
  -2 -16  -8  663.10  140.19
   2 -16   8  625.87  184.63
  -2  16  -8  408.39   72.17
  -2 -16  -9 1692.78  314.00
   2 -16   9 1487.03  568.53
  -2  16  -9 1126.75  250.81
  -2 -16 -10  482.16  133.03
   2 -16  10  459.13  103.15
  -2  16 -10  297.63   68.03
  -2 -16 -11  619.13  102.55
   2 -16  11  477.41  122.06
  -2  16 -11  446.43  138.14
  -2 -16 -12  404.47  108.03
   2 -16  12  186.09   93.56
  -2  16 -12  198.75   45.70
  -2 -16 -13   48.28   32.55
   2 -16  13   67.23   38.41
  -2  16 -13   50.30   37.57
  -2 -16 -14   52.12   29.31
   2 -16  14   45.06   41.88
  -2  16 -14   43.73   31.29
  -2 -16 -15  175.80   46.22
   2 -16  15  136.47   79.05
  -2  16 -15   18.01   38.57
  -2 -16 -16   94.18   84.03
   2 -16  16  117.83   42.61
  -2 -16 -17   52.24   38.32
   2 -16  17   23.58   42.07
  -2  16 -17   37.68   47.84
   2 -18 -17  126.68   59.26
  -2 -18  17  164.14   85.64
   2 -18 -16   68.87   70.67
  -2 -18  16   66.80   30.56
   2 -18 -15   47.16   75.11
  -2 -18  15  115.80   79.18
   2 -18 -14   95.85   60.56
  -2 -18  14   65.11   83.93
   2 -18 -13   44.05   38.37
  -2 -18  13   74.03   38.12
   2 -18 -12  140.56   62.79
  -2 -18  12   47.28   47.92
   2 -18 -11 1724.49  281.54
  -2 -18  11 1879.52  362.24
   2 -18 -10   33.75   81.15
  -2 -18  10  111.73   42.19
   2 -18  -9  925.86  305.28
  -2 -18   9  887.21  211.15
   2 -18  -8  102.71   46.55
  -2 -18   8   81.25   81.35
   2 -18  -7 1241.83  356.66
  -2 -18   7 1213.52  279.31
   2 -18  -6  155.54   96.38
  -2 -18   6  159.06   87.43
   2 -18  -5  194.77   89.47
  -2 -18   5  129.20   75.82
   2 -18  -4  234.07   87.20
  -2 -18   4   85.96   24.77
   2 -18  -3   37.39   51.51
  -2 -18   3   64.62   45.81
   2 -18  -2 1477.11  334.91
  -2 -18   2  965.15  141.12
  -2 -18   1 1975.59  554.27
   2 -18  -1 1938.37  579.35
   2 -18   0   82.86  108.32
  -2 -18   0  367.85   88.08
  -2 -18  -1 1587.21  439.56
   2 -18   1 1159.76  475.68
   2 -18   2 1179.31  398.84
  -2 -18  -2 1357.63  260.08
  -2 -18  -3   64.53   35.24
   2 -18   3  116.93   73.35
  -2 -18  -4   85.54   60.11
   2 -18   4   20.06   34.59
  -2 -18  -5  277.83  114.56
   2 -18   5  244.02   79.96
  -2 -18  -6   59.24   66.49
   2 -18   6  109.08   35.65
  -2 -18  -7  654.89  133.69
   2 -18   7  578.00  179.43
  -2 -18  -8  132.66   32.66
   2 -18   8   25.85   28.47
  -2 -18  -9  911.20  202.96
   2 -18   9  483.05  353.46
  -2 -18 -10   18.20   53.70
   2 -18  10   29.27   19.31
  -2 -18 -11  333.61  178.22
   2 -18  11  367.85  102.50
  -2 -18 -12   30.66   46.12
   2 -18  12   21.26   22.25
  -2 -18 -13   16.25   20.75
   2 -18  13    1.32   32.61
  -2 -18 -14   43.98   52.56
   2 -18  14    8.62   26.69
  -2 -18 -15   63.08   29.68
   2 -18  15   23.91   28.27
   2 -20 -15   38.45   29.33
   2 -20 -14   68.35   29.61
  -2 -20  14   40.41   19.98
   2 -20 -13   96.59   45.49
  -2 -20  13   22.51   36.61
   2 -20 -12  154.64   55.49
  -2 -20  12   39.63   58.36
   2 -20 -11   15.62   54.35
  -2 -20  11   83.23   77.80
   2 -20 -10   15.63   55.52
  -2 -20  10   54.38   47.04
   2 -20  -9  252.64   82.89
  -2 -20   9  245.95  158.78
   2 -20  -8  455.60  205.64
  -2 -20   8  284.36   62.56
   2 -20  -7   63.17   24.93
  -2 -20   7   10.88   49.92
   2 -20  -6   40.65   35.67
  -2 -20   6   38.66   68.69
   2 -20  -5  117.64   71.97
  -2 -20   5   41.79   65.14
   2 -20  -4  306.95  137.22
  -2 -20   4  492.67  106.26
   2 -20  -3  317.33  156.16
  -2 -20   3  286.74   97.58
   2 -20  -2   61.41   60.85
  -2 -20   2   82.70   51.97
   2 -20  -1  143.19   71.32
  -2 -20   1  242.47   85.06
  -2 -20   0  245.79   67.34
   2 -20   0  303.44   68.14
  -2 -20  -1   50.81   40.89
   2 -20   1   69.84   40.52
  -2 -20  -2  100.83   38.20
   2 -20   2  154.34   58.40
  -2 -20  -3   58.46   44.59
   2 -20   3  147.50   75.02
  -2 -20  -4   37.49   41.61
   2 -20   4   53.14   36.17
  -2 -20  -5   84.98   58.34
   2 -20   5   45.45   27.49
  -2 -20  -6   69.30   52.15
   2 -20   6   50.92   37.94
  -2 -20  -7   87.75   34.51
   2 -20   7   66.87   59.92
  -2 -20  -8  188.68   65.88
   2 -20   8  372.98  130.59
  -2 -20  -9   87.96   44.00
   2 -20   9   16.12   22.19
  -2 -20 -10   90.61   29.10
   2 -20  10   39.18   42.65
  -2 -20 -11   50.36   25.20
   2 -20  11   63.06   50.98
   2 -20  12   18.18   40.71
   2 -22 -11  145.54   95.44
  -2 -22  11   29.40   33.72
   2 -22 -10  238.06  125.22
  -2 -22  10  185.74  107.21
   2 -22  -9   47.48   37.80
  -2 -22   9  107.83   46.76
   2 -22  -8   61.11   39.24
  -2 -22   8   71.04   53.54
   2 -22  -7   -1.35   37.70
  -2 -22   7    8.92   28.51
   2 -22  -6   17.92   73.32
  -2 -22   6   70.55   83.40
   2 -22  -5  190.78   49.36
  -2 -22   5  148.75   66.30
   2 -22  -4   93.91   65.66
  -2 -22   4   27.49   43.39
   2 -22  -3   16.27   43.60
  -2 -22   3   34.84   32.27
   2 -22  -2   -1.14   31.41
  -2 -22   2   62.05   54.82
   2 -22  -1    7.54   50.37
  -2 -22   1   36.27   60.50
  -2 -22   0   12.72   76.34
   2 -22   0   62.17   78.24
  -2 -22  -1  110.25   72.41
   2 -22   1   20.06   28.47
  -2 -22  -2  238.13  109.32
   2 -22   2  172.01   90.08
  -2 -22  -3  113.86   65.00
   2 -22   3   92.53   52.66
  -2 -22  -4   83.11   64.56
   2 -22   4  129.06   49.48
  -2 -22  -5   34.26   64.31
   2 -22   5  224.53  112.00
  -2 -22  -6   31.49   41.16
   2 -22   6   25.77   44.39
  -2 -22  -7   72.21   66.99
   2 -22   7   12.89   10.70
  -2 -22  -8   54.17   79.18
  -2 -22  -9   26.06   40.30
   2 -22   9   34.94   21.55
   2 -24  -6  104.59   47.07
  -2 -24   6   52.17   33.24
   2 -24  -5   70.64   47.46
  -2 -24   5   36.95   41.93
   2 -24  -4   68.78   61.17
  -2 -24   4   67.37   80.16
   2 -24  -3  190.70   90.41
  -2 -24   3  139.57  127.06
   2 -24  -2   49.33   46.95
  -2 -24   2   45.17   37.56
   2 -24  -1   89.91   52.85
  -2 -24   1   83.65   68.82
  -2 -24   0   44.64   58.97
   2 -24   0   25.04   26.63
  -2 -24  -1   68.21   61.48
   2 -24   1  109.91   58.02
  -2 -24  -2  417.17  165.70
   2 -24   2  623.45  218.47
  -2 -24  -3  131.39  100.34
   2 -24   3   45.58   58.61
  -2 -24  -4   86.00   61.54
   2 -24   4   19.58   37.13
   3   1 -25  137.87   72.65
   3  -1 -25  206.77   95.87
   3   1 -24   85.96   49.34
   3  -1 -24  124.82   82.85
   3  -1 -23   49.54   36.27
   3   1 -23   52.98   32.61
   3   1 -22  168.81   70.72
   3  -1 -22   98.01   54.87
   3  -1 -21   92.36   37.75
   3   1 -21  113.40   57.67
   3  -1 -20   63.54   47.89
   3   1 -20    2.77   67.06
   3  -1 -19  102.80   70.00
   3   1 -19   97.63   34.57
   3  -1 -18  245.34   32.24
   3   1 -18   94.80   47.68
   3   1 -17  611.57  166.25
   3  -1 -17  304.49   92.74
   3   1 -16   52.05   48.65
   3  -1 -16   42.43   38.44
   3  -1 -15  671.04  142.63
  -3  -1  15  666.03  155.48
   3   1 -15  416.15   86.71
   3  -1 -14  327.03   58.73
   3   1 -14  159.96   64.09
   3  -1 -13 2173.22  390.83
  -3  -1  13 2538.20  185.63
  -3  -1  13 1938.55  106.12
   3   1 -13 1993.27  122.35
   3  -1 -12  805.82  173.84
  -3  -1  12 1003.46  205.86
  -3  -1  12  640.26  131.81
   3   1 -12  703.82  130.28
   3  -1 -11  264.97   99.41
  -3  -1  11  129.39   43.63
  -3  -1  11  108.50   33.53
   3   1 -11  160.15   29.09
   3  -1 -1016828.20  440.86
  -3  -1  1017303.40  454.38
  -3  -1  1016600.30  342.61
   3   1 -1016078.70  355.12
   3  -1  -9  388.79  100.88
  -3  -1   9  339.70   95.62
   3   1  -9  318.10   56.66
   3  -1  -8   78.39   37.63
   3   1  -8  215.17   45.12
   3  -1  -8  208.30   38.39
  -3  -1   8  309.15   71.38
  -3  -1   8  215.72   28.81
   3   1  -7 6026.96  196.14
  -3  -1   7 6207.26  206.79
   3  -1  -7 5682.92  191.11
   3   1  -614381.80  260.51
  -3  -1   615077.80  277.88
   3  -1  -614069.70  259.48
  -3   1   613773.10  258.56
   3   1  -516978.70  272.38
  -3  -1   517429.30  283.98
   3  -1  -517425.20  311.15
   3  -1  -517186.70  180.37
   3  -1  -4  731.09  157.05
   3   1  -4  655.92  183.66
   3  -1  -4  693.24  131.12
  -3  -1   4  917.87  195.58
   3  -1  -4  707.44   29.72
   3  -1  -3 8221.56  206.98
  -3  -1   3 8182.08  206.57
   3   1  -3 8367.45  207.41
   3  -1  -3 8105.01  200.63
   3  -1  -3 7946.82  180.27
  -3   1   3 8475.67  193.28
  -3   1   3 8640.06  194.70
  -3  -1   236938.60  413.85
   3  -1  -238145.60  419.64
  -3   1   236745.50  412.53
   3  -1  -236024.70  401.64
  -3   1   237142.50  425.98
   3  -1  -236812.80  421.79
   3  -1  -135572.70  373.24
  -3   1   135232.20  366.38
   3  -1  -134423.50  405.09
  -3  -1   134303.10  403.65
  -3  -1   134978.50  407.26
  -3   1   134771.80  598.38
   3  -1  -135199.00  408.95
   3   1  -135568.00  420.12
  -3  -1   012939.60  172.26
   3   1   013261.30  238.58
   3  -1   013369.00  208.57
  -3   1   013677.20  214.54
  -3  -1   013686.50  209.11
  -3   1   012929.00  210.48
   3   1   013058.60  198.17
  -3  -1   013860.10  210.66
  -3   1   012866.50  206.16
   3  -1   012934.00  212.50
   3   1   012874.70  204.45
   3   1   114369.20  188.46
   3  -1   114140.80  151.61
   3  -1   114009.30  240.98
   3   1   114345.40  228.64
  -3  -1  -114332.50  228.97
   3  -1   114123.50  228.23
  -3  -1  -113403.10  222.95
   3  -1   113915.50  224.07
   3   1   114053.10  221.59
  -3  -1  -113992.70  224.59
  -3   1  -113861.70  237.96
  -3   1  -114283.50  252.58
   3  -1   113846.00  224.96
   3   1   114015.90  228.38
  -3  -1  -113824.40  254.24
   3   1   213091.40  187.47
  -3  -1  -213259.70  191.64
  -3   1  -213121.10  167.66
   3  -1   213209.20  165.13
  -3  -1  -212588.40  222.89
  -3   1  -212886.70  229.81
  -3  -1  -213497.90  302.20
  -3   1  -213008.00  247.64
  -3   1  -213464.40  235.23
  -3  -1  -212869.60  224.76
   3   1   212812.80  247.99
   3  -1   213499.40  262.69
  -3   1  -213542.90  237.07
   3   1   213943.30  249.01
   3   1   331325.70  366.73
  -3  -1  -332480.50  381.32
  -3   1  -331440.30  352.99
   3  -1   332624.20  371.01
  -3   1  -331694.60  443.45
   3  -1   332847.30  438.42
  -3  -1  -330675.50  420.43
  -3   1  -332543.00  441.14
   3  -1   332218.40  432.79
   3   1   331132.10  419.93
  -3  -1  -330454.70  416.88
  -3  -1  -4  930.78   63.14
  -3   1  -4 1022.61   58.01
   3  -1   4  980.85   51.07
  -3  -1  -4  998.01  221.64
   3  -1   4  937.41  214.96
  -3   1  -4  901.17   77.80
   3  -1   4  977.50   95.55
   3   1   4 1035.87   72.82
  -3   1  -4 1009.84   76.59
   3  -1   4  821.34  207.47
   3   1   4  855.67   89.11
  -3  -1  -4  883.49  164.00
  -3  -1  -5 2797.02  145.19
  -3   1  -5 2832.20  141.54
  -3  -1  -5 2719.31  140.17
   3  -1   5 2657.28  134.86
  -3  -1  -5 3091.19  177.40
   3  -1   5 3004.49  306.42
  -3   1  -5 3352.25  258.62
   3  -1   5 2583.44  195.02
   3  -1   5 2862.15  165.26
   3   1   5 2737.88  160.70
  -3   1  -5 2892.69  161.56
  -3  -1  -5 2705.56  153.07
  -3  -1  -6  492.51   82.06
  -3   1  -6  428.09   99.77
  -3  -1  -6  407.39   99.07
   3  -1   6  462.65  114.38
   3  -1   6  357.80  110.08
  -3  -1  -6  284.12  110.26
  -3   1  -6  621.62  125.50
   3  -1   6  331.84  112.16
   3   1   6  274.97   53.46
  -3   1  -6  513.87  150.72
  -3  -1  -6  422.16   94.38
  -3  -1  -7  327.35   50.51
  -3   1  -7  173.07   44.49
  -3  -1  -7  233.83   74.31
  -3  -1  -7  256.62   72.13
   3  -1   7  198.07   49.90
  -3   1  -7  140.32  106.43
   3   1   7  179.94   47.42
   3  -1   7  114.78   43.35
  -3   1  -7  318.89   68.28
  -3  -1  -7  323.27   69.96
  -3   1  -8 1761.47  100.37
  -3  -1  -8 1914.77  103.10
  -3   1  -8 1605.32   86.22
  -3  -1  -8 1513.59   88.79
  -3  -1  -8 1884.68  143.89
  -3   1  -8 1714.24  230.59
   3   1   8 1396.01   99.42
  -3   1  -8 1967.76  132.12
  -3  -1  -8 1702.80  213.40
  -3  -1  -9   28.06   42.11
  -3   1  -9    3.06   31.80
  -3   1  -9    8.46   15.21
  -3  -1  -9   12.21   27.78
  -3  -1  -9   72.14   20.93
  -3   1  -9   80.60   41.08
  -3   1  -9   77.00   20.87
  -3  -1  -9   89.16   43.24
  -3  -1 -10   59.81   72.03
  -3   1 -10  246.50   50.99
  -3   1 -10  163.26   58.66
  -3  -1 -10  193.51   37.61
  -3  -1 -10  125.21   78.86
  -3   1 -10  118.21   93.53
  -3   1 -11   32.15   22.88
  -3  -1 -11   31.65   17.78
  -3   1 -11   45.98   20.07
  -3  -1 -11   33.63   45.88
  -3   1 -11   57.11   38.26
  -3  -1 -12 1527.79  234.42
  -3   1 -12 1783.89  356.86
  -3  -1 -12 1486.13  281.61
  -3   1 -12 1305.26  284.27
  -3   1 -12 1358.14  368.89
  -3   1 -13   24.26   28.09
  -3  -1 -13   28.49   40.90
  -3  -1 -13   40.47   34.90
  -3   1 -13   31.97   26.37
  -3   1 -14 4400.50  431.79
  -3  -1 -14 4075.00  319.89
  -3  -1 -14 3891.21  279.43
  -3   1 -14 3525.65  298.96
  -3   1 -15  271.62   38.73
  -3  -1 -15  143.18   92.73
  -3  -1 -15  152.45   60.91
  -3   1 -15  201.72   69.92
  -3   1 -16   63.94   29.24
  -3  -1 -16   25.51   59.78
  -3  -1 -16  117.40   49.97
  -3  -1 -17  691.20  138.00
  -3   1 -17  711.38  159.93
  -3   1 -18  450.80  128.59
  -3  -1 -18  801.26  127.89
  -3  -1 -19  538.04  135.13
  -3   1 -19  749.23  209.43
  -3   1 -20  122.45   58.97
  -3  -1 -20   12.18   28.21
  -3   1 -21  224.98   75.94
  -3  -1 -21  419.56   57.92
  -3   1 -22   60.81   41.12
  -3  -1 -22    7.17   26.70
   3  -3 -25   86.36   40.09
   3   3 -25   95.35   53.63
   3  -3 -24   52.21   33.77
   3   3 -24   20.49   37.18
   3  -3 -23   84.64   67.89
   3   3 -23   77.81   41.23
   3   3 -22  202.73   55.53
   3  -3 -22   42.95   52.34
   3   3 -21  129.26   48.79
   3  -3 -21  209.04   73.32
   3   3 -20  463.63  242.84
   3  -3 -20  573.08  127.48
   3  -3 -19   89.95   41.57
  -3  -3  19   74.29  103.50
   3  -3 -18   49.63   61.90
  -3  -3  18   92.34   43.88
   3   3 -18    8.44   14.00
   3  -3 -17   32.73   53.94
  -3  -3  17   77.53   62.39
   3   3 -17   26.10   11.97
   3  -3 -16 2079.64  492.71
  -3  -3  16 1731.78  461.72
  -3  -3  16 1452.97  107.70
   3   3 -16 1684.60  120.65
   3  -3 -15  401.23  111.23
  -3  -3  15  314.54  112.93
  -3  -3  15  106.81   36.64
   3   3 -15  251.07   42.26
   3  -3 -14 4039.09  315.33
  -3  -3  14 4129.71  272.55
  -3  -3  14 3703.32  190.80
   3   3 -14 3544.50  192.18
   3  -3 -1315508.50  567.83
  -3   3  1312956.10  436.49
   3   3 -1314903.00  471.02
   3  -3 -12 1363.40  271.28
  -3  -3  12 1115.42  320.18
  -3  -3  12 1104.34  163.95
   3   3 -12 1066.13   68.61
  -3   3  12  894.62  101.95
   3  -3 -11 2655.68  418.12
  -3  -3  11 2894.95  271.90
  -3  -3  11 2520.04  174.14
  -3   3  11 2364.38   73.85
   3  -3 -10  148.73   44.19
  -3  -3  10  177.93   59.70
  -3   3  10  231.63   51.37
   3  -3  -9   75.97   29.47
  -3  -3   9   99.43   56.73
   3  -3  -8 2348.70  158.34
   3   3  -8 1830.26  104.67
  -3  -3   8 2066.82  113.26
   3  -3  -8 2163.08  107.31
  -3   3   7 6078.02  254.51
   3  -3  -7 6129.08  214.06
   3   3  -7 5970.16  237.07
  -3  -3   7 6726.12  271.30
   3  -3  -616652.90  305.71
  -3   3   615677.30  291.44
   3   3  -615803.10  340.11
  -3  -3   616625.30  307.95
   3  -3  -5 6431.73  218.04
  -3   3   5 6120.70  188.27
   3   3  -5 6488.87  224.50
  -3  -3   5 6290.04  210.41
  -3   3   4  284.86   41.38
   3  -3  -4  311.81   70.62
   3   3  -4  157.52   54.32
  -3  -3   4  233.21   81.70
  -3   3   3153172.8 1539.52
   3  -3  -3153387.8 1544.04
   3   3  -3157452.9 1602.33
  -3  -3   3159520.0 1615.93
  -3   3   2  246.01   44.89
  -3  -3   2  234.51  102.15
   3   3  -2  286.00   61.51
  -3   3   1 1474.64   69.63
   3  -3  -1 1430.67   69.39
   3   3  -1 1475.10   73.88
  -3  -3   1 1426.84   84.39
   3  -3  -1 1315.91   58.48
   3   3  -1 1432.52   53.25
  -3  -3   1 1399.74   52.19
   3  -3   064976.80  680.21
   3   3   062762.10  683.24
  -3   3   064284.60  669.12
  -3  -3   065961.60  719.61
   3   3   062227.70  659.37
  -3   3   064153.60  721.90
  -3  -3   061991.30  657.41
  -3   3   063731.40  700.68
   3   3   062444.30  660.64
  -3  -3   062586.40  677.44
  -3   3  -1168781.0 1633.04
  -3   3  -1172586.7  681.60
   3  -3   1171844.8  655.43
   3  -3   1168474.3 1701.39
   3   3   2 9357.72  295.92
  -3  -3  -2 9191.12  233.69
  -3   3  -2 9107.48  212.98
   3  -3   2 8967.56  211.66
  -3  -3  -2 9010.83  235.19
  -3   3  -2 9200.70  251.83
   3  -3   2 9072.27  253.63
   3  -3   2 9203.79  248.53
   3   3   2 8928.97  229.95
  -3   3  -2 8612.65  235.87
   3   3   3 5050.74  154.49
  -3  -3  -3 5049.30  181.05
  -3   3  -3 4693.32  132.29
   3  -3   3 5130.24  146.79
  -3   3  -3 4841.41  167.18
   3  -3   3 5020.28  169.43
   3  -3   3 4559.62  154.37
   3   3   3 4816.83  154.91
  -3   3  -3 4799.80  177.46
   3   3   4 9988.21  305.69
  -3  -3  -4 9664.39  301.35
  -3   3  -4 9174.15  279.31
   3  -3   4 9900.08  296.47
  -3   3  -4 9693.02  324.34
   3  -3   4 8764.89  289.85
   3  -3   4 9188.37  351.96
   3   3   4 9096.27  291.88
  -3   3  -410516.00  340.37
   3   3   4 9724.37  312.10
   3   3   5 1069.86   70.88
  -3  -3  -5 1047.35   80.87
  -3   3  -5 1049.90   70.89
   3  -3   5 1153.90   89.76
   3  -3   5 1009.23  241.33
   3  -3   5  921.96   67.21
  -3   3  -5 1140.38  312.39
   3   3   5  883.23  157.44
   3   3   6 2914.51  215.60
  -3  -3  -6 2812.10  272.00
  -3   3  -6 2686.65  140.26
   3  -3   6 2644.26  188.12
  -3  -3  -6 2900.93  163.09
   3  -3   6 2423.68  154.80
  -3   3  -6 2573.31  162.63
   3   3   6 2695.53  150.87
  -3  -3  -7 1534.09   85.63
  -3   3  -7 1554.93   75.90
   3  -3   7 1550.34   99.71
  -3  -3  -7 1637.03  175.54
  -3   3  -7 1517.32  169.25
   3   3   7 1253.42   98.36
  -3  -3  -8  387.16   86.72
  -3   3  -8  217.96   69.16
   3  -3   8  389.84   79.39
  -3  -3  -8  290.34   98.15
  -3  -3  -8  341.07  173.91
  -3   3  -8  346.83  145.13
   3   3   8  249.09   77.25
  -3  -3  -9 3130.98  199.45
  -3   3  -9 2530.75  213.16
   3  -3   9 3057.58  142.24
  -3  -3  -9 2930.73  136.21
  -3   3  -9 3104.53  157.20
  -3  -3 -10  964.19  170.35
   3  -3  10  786.16  195.50
  -3  -3 -10  715.29  169.28
  -3   3 -10  642.80  241.91
  -3  -3 -11  357.02   92.97
   3  -3  11  348.44   77.57
  -3  -3 -11  246.17   54.55
  -3   3 -11  311.20   96.66
  -3  -3 -12 4918.04  272.02
   3  -3  12 4617.86  246.25
  -3  -3 -12 4808.31  529.67
  -3   3 -12 3685.21  317.13
  -3  -3 -13 1222.94  223.58
   3  -3  13 1344.72  349.69
  -3  -3 -13 1236.09  325.78
  -3   3 -13  899.70  306.53
  -3   3 -14 1037.75  179.95
  -3  -3 -14  928.81  151.57
  -3  -3 -14  812.51  193.75
  -3   3 -15 7822.81  321.32
  -3  -3 -15 7295.30  379.73
  -3  -3 -15 7771.17  716.63
  -3   3 -16  415.87   86.11
  -3  -3 -16  423.82   73.81
  -3  -3 -16  457.35  105.87
  -3   3 -16  323.04  117.18
  -3   3 -17   30.34   36.16
  -3  -3 -17   -1.62   28.87
  -3  -3 -17   18.70   33.20
  -3   3 -17   20.53   19.37
  -3   3 -18   25.67   31.61
  -3  -3 -18   55.22   42.03
  -3  -3 -18   22.64   36.01
  -3   3 -18   94.08   49.44
  -3   3 -19  122.04   72.34
  -3  -3 -19   -7.31   53.11
  -3   3 -20  129.74   44.15
  -3  -3 -20   73.42   59.70
  -3   3 -21   -2.96   16.45
  -3  -3 -21   49.28   35.50
  -3  -3 -22   24.89   26.80
   3   5 -24  245.33  100.22
   3  -5 -24  100.32   59.95
   3   5 -23   66.00   89.13
   3  -5 -23   31.85   38.38
   3  -5 -22   65.94   33.23
  -3  -5  22   50.82   45.92
   3  -5 -21   17.21   37.28
  -3  -5  21   70.01   31.47
   3  -5 -20  653.09  154.64
  -3  -5  20  636.83   88.79
   3  -5 -19   74.31   26.98
  -3  -5  19   24.39   50.03
   3  -5 -18   75.33   31.48
  -3  -5  18   65.11   75.76
   3   5 -18   43.97   12.82
   3  -5 -17  177.12   68.24
  -3  -5  17  122.09   68.89
   3   5 -17   10.29   18.23
   3  -5 -16   46.49   70.49
  -3  -5  16  114.35  145.69
   3   5 -16  143.34   54.13
  -3   5  16   42.97   13.20
   3  -5 -15 2936.60  661.28
  -3  -5  15 2838.28  237.00
   3  -5 -15 2478.65  261.53
  -3  -5  15 2003.96  335.33
   3  -5 -14 1268.89  272.52
  -3  -5  14 1393.81  385.83
   3  -5 -14 1338.00  183.46
  -3  -5  14  856.36  189.43
  -3   5  14 1035.70   91.81
   3  -5 -13 6469.70  303.74
   3  -5 -13 5836.54  144.73
  -3  -5  13 5640.72  398.69
  -3   5  13 5262.99  379.06
   3  -5 -12 2200.41  485.04
  -3  -5  12 2160.13  245.50
  -3   5  12 1903.40   78.69
   3  -5 -11  127.69   61.84
  -3  -5  11  193.69   44.18
   3  -5 -1021673.60  589.87
  -3  -5  1021327.70  625.93
   3  -5  -9 1914.83  375.44
  -3  -5   9 1990.44  336.90
   3  -5  -814790.60  483.07
  -3  -5   815689.60  618.35
   3  -5  -7 2122.35  134.27
  -3  -5   7 2458.88  282.02
  -3   5   628521.80  804.36
   3  -5  -632170.50  898.33
   3   5  -628313.40  796.64
  -3  -5   631130.80  872.70
  -3   5   5 4799.01  170.30
   3  -5  -5 5234.25  190.44
   3   5  -5 4781.09  252.81
  -3  -5   5 5281.29  227.89
   3  -5  -423352.40  371.41
  -3   5   423522.80  401.79
   3   5  -421797.20  465.72
  -3  -5   423137.40  372.97
  -3   5   3 9020.77  291.81
   3  -5  -3 9330.23  259.23
   3   5  -3 9130.69  254.14
  -3  -5   3 9442.09  264.68
  -3   5   211563.10  223.23
   3  -5  -211743.10  224.38
   3   5  -211072.30  289.27
  -3  -5   211503.00  232.34
  -3   5   1 1027.91   62.89
   3  -5  -1 1078.92   66.89
  -3  -5   1  953.28   70.16
   3   5  -1 1079.71  178.11
   3   5  -1 1093.64   39.83
   3  -5  -1  984.78   56.19
  -3   5   1 1142.01   64.53
  -3  -5   1 1167.93   56.80
  -3   5   0 2607.76  118.91
   3   5   0 2673.64  125.56
   3  -5   0 2801.86  109.42
  -3  -5   0 2838.06  163.33
   3  -5   0 2757.57  101.62
  -3   5   0 2687.75  103.97
  -3  -5   0 2661.00  147.72
   3   5   0 2679.73  106.08
  -3   5   0 2762.43  181.89
  -3  -5   0 2677.87   93.96
   3   5   1 3741.72  228.09
  -3   5  -1 3599.48  123.20
  -3  -5  -1 3744.91  140.98
   3  -5   1 3836.99  157.03
   3  -5   1 3820.61  128.34
  -3  -5  -1 3534.36  113.50
  -3   5  -1 3703.76  127.07
   3  -5   1 3579.01  125.42
  -3   5  -1 3709.37  128.38
   3   5   1 3773.30  116.16
   3   5   214813.80  264.08
  -3  -5  -215091.20  274.08
  -3   5  -214499.00  251.15
   3  -5   215419.60  257.65
  -3  -5  -214803.50  237.57
  -3   5  -214744.10  258.72
   3  -5   214151.00  245.49
   3   5   214685.40  232.42
  -3   5  -214237.40  251.64
   3   5   346525.60 1247.64
  -3  -5  -346577.70 1248.10
  -3   5  -346090.30 1216.23
   3  -5   347115.70 1243.26
  -3   5  -347127.80 1256.08
   3   5   345505.30 1215.21
   3  -5   344908.10 1193.22
   3   5   429509.30  820.51
  -3  -5  -429512.10  823.23
  -3   5  -428942.10  785.23
   3  -5   429325.40  815.58
  -3   5  -429431.60  823.35
   3  -5   426785.40  750.01
   3   5   427940.80  776.29
   3   5   5 8226.24  295.62
  -3  -5  -5 8551.90  296.10
  -3   5  -5 8127.45  242.79
   3  -5   5 8883.93  291.70
  -3   5  -5 8908.73  308.08
   3  -5   5 7743.33  355.72
   3   5   6 5403.01  257.25
  -3  -5  -6 5303.84  260.30
  -3   5  -6 5027.80  234.88
   3  -5   6 5484.67  325.91
  -3  -5  -7   67.86   38.44
  -3   5  -7   42.82   21.01
   3  -5   7   49.38   15.64
  -3   5  -7   26.91   48.63
  -3  -5  -8 6081.65  261.70
   3  -5   8 5771.18  275.17
  -3   5  -8 6330.32  306.76
  -3  -5  -9  423.01  105.34
   3  -5   9  468.40  119.91
  -3  -5  -9  348.24   95.28
  -3   5  -9  466.34   79.24
  -3  -5 -10  334.64   79.02
   3  -5  10  226.44   84.98
  -3  -5 -10  262.55   55.17
  -3   5 -10  312.25  100.54
  -3  -5 -11  583.22  101.59
   3  -5  11  421.62  145.46
  -3  -5 -11  661.01  199.65
  -3   5 -11  592.76  126.07
  -3  -5 -12 4361.24  266.39
   3  -5  12 4306.04  239.34
  -3  -5 -12 3825.61  316.85
  -3  -5 -13  397.77  112.11
   3  -5  13  499.76  148.04
  -3  -5 -13  475.46   96.84
  -3  -5 -14 1219.77  217.38
  -3  -5 -14 1343.34  264.43
  -3   5 -14  991.49  257.08
  -3  -5 -15 3315.33  522.34
   3  -5  15 3705.32  228.32
  -3  -5 -15 3446.76  310.44
  -3   5 -15 3435.14  438.77
  -3  -5 -16  257.95   97.12
   3  -5  16  241.70   89.40
  -3  -5 -16  259.95   67.37
  -3   5 -16  304.02   67.92
  -3   5 -17  676.79  147.82
  -3  -5 -17  445.03  104.72
  -3  -5 -17  479.46   96.32
  -3   5 -17  338.37  159.44
  -3   5 -18  248.34   95.29
  -3  -5 -18  183.62   75.16
  -3  -5 -18   57.63   25.89
  -3   5 -18  117.44   41.44
  -3   5 -19   15.53   32.89
  -3  -5 -19   36.99   21.67
  -3   5 -20  269.10   85.78
  -3  -5 -20  165.60   86.49
  -3   5 -21  190.36   63.11
  -3  -5 -21  159.43   69.33
   3  -7 -24   71.10   66.97
  -3  -7  24   31.03   15.74
   3  -7 -23  409.52  116.51
  -3  -7  23  218.08  120.33
   3  -7 -22  103.82   52.30
  -3  -7  22  115.60   70.81
   3  -7 -21  644.26  131.62
  -3  -7  21  572.53  254.19
   3  -7 -20  126.51   63.23
  -3  -7  20   51.33   66.50
   3  -7 -19 3495.30  675.76
  -3  -7  19 3661.72  333.24
   3  -7 -18  116.93   58.81
  -3  -7  18   84.32   78.77
   3   7 -18   39.91   34.55
   3  -7 -17 2211.84  382.15
  -3  -7  17 2069.52  306.77
   3  -7 -17 1573.30  152.32
   3   7 -17 1558.05  420.21
   3  -7 -16   16.98   35.94
  -3  -7  16  112.04   64.36
   3  -7 -16   12.79   13.55
   3  -7 -15 5727.24  876.55
  -3  -7  15 5979.51  369.33
   3  -7 -15 5343.91  293.29
   3  -7 -14  -61.81   57.77
  -3  -7  14   39.54   40.55
  -3   7  14    9.58    7.75
   3  -7 -13  651.01  122.25
  -3  -7  13  711.56  160.35
   3  -7 -12   60.10   48.35
  -3  -7  12   50.40   39.73
   3  -7 -1114200.70  536.73
   3  -7 -10 2239.74  466.56
  -3  -7  10 2129.32  433.89
   3  -7  -9 7979.47  336.83
  -3  -7   9 8736.82  358.86
   3  -7  -8 3324.26  440.73
  -3  -7   8 3485.80  209.27
   3  -7  -7 5823.68  336.35
  -3  -7   7 5871.43  311.61
   3  -7  -6 1340.40  276.93
  -3  -7   6 1449.30  108.14
   3  -7  -521422.00  638.32
  -3  -7   521752.20  772.96
  -3   7   4   60.60   29.58
   3  -7  -4  164.69   71.65
  -3  -7   4   55.94   59.33
  -3   7   313900.70  470.75
   3  -7  -314796.40  460.72
   3   7  -312899.40  418.62
  -3  -7   314649.60  459.60
  -3   7   2  226.09   45.93
   3  -7  -2  167.72   73.74
  -3  -7   2  153.67   52.33
   3   7  -2   59.49   26.91
   3   7  -2  148.83   24.29
   3  -7  -2  181.18   42.10
  -3   7   1 2804.29  156.04
   3   7  -1 2930.64  166.09
   3  -7  -1 3180.50  188.45
  -3  -7   1 3408.30  200.53
   3  -7  -1 3233.65  156.62
  -3   7   1 3115.85  153.16
   3   7   0 2295.46  136.69
  -3   7   0 2336.91  167.55
  -3  -7   0 2690.36  172.20
   3  -7   0 2458.22  155.16
   3  -7   0 2470.16  155.43
  -3   7   0 2522.98  134.45
   3   7   0 2471.27  125.97
   3   7   1 8529.12  509.28
  -3   7  -1 8609.03  282.89
  -3  -7  -1 8990.21  313.26
   3  -7   1 8454.02  287.35
  -3  -7  -1 8694.38  258.95
   3  -7   1 8566.10  281.35
  -3   7  -1 8248.85  261.25
   3  -7   1 8235.40  267.13
   3   7   1 8994.51  259.85
  -3   7  -1 9209.75  310.92
  -3   7  -2  280.14   63.17
  -3  -7  -2  399.59   86.73
   3   7   2  301.43   70.81
   3  -7   2  186.95   96.76
  -3  -7  -2  291.94   63.02
  -3   7  -2  349.07   63.17
   3  -7   2  339.37   92.29
  -3   7  -2  367.68   63.89
   3   7   2  357.52   64.64
  -3  -7  -312551.20  503.66
  -3   7  -311600.30  361.72
   3  -7   312400.40  390.49
  -3   7  -312105.60  374.82
   3  -7   311924.80  363.60
   3   7   311884.40  354.17
  -3  -7  -4  127.14   50.06
  -3   7  -4  231.13   53.33
   3  -7   4  261.82   72.57
  -3   7  -4  202.83   58.48
   3  -7   4  174.95   50.00
   3   7   4   93.20   50.69
  -3  -7  -510363.50  308.33
  -3   7  -5 9791.02  267.48
   3  -7   510583.70  295.55
  -3   7  -510650.50  501.57
   3  -7   5 9575.21  267.37
  -3  -7  -6   31.00   36.30
  -3   7  -6   28.85   16.57
   3  -7   6   80.07   49.33
  -3   7  -6  109.87   48.00
  -3  -7  -723006.00  778.88
   3  -7   723364.40  771.11
  -3   7  -722489.20  853.97
  -3  -7  -8 2131.55  425.23
   3  -7   8 1889.12  126.24
  -3   7  -8 1695.95  394.94
  -3  -7  -914087.60  517.20
   3  -7   913313.70  569.79
  -3  -7 -10  791.26  111.85
   3  -7  10  742.29  135.19
  -3  -7 -11 4039.15  651.72
   3  -7  11 3648.10  212.72
  -3  -7 -11 3502.50  223.47
  -3  -7 -12   27.99   32.95
   3  -7  12   56.59   25.91
  -3  -7 -12   59.46   45.63
  -3   7 -12   39.32   23.02
  -3  -7 -13  260.09   61.65
  -3  -7 -13  320.21   86.25
  -3   7 -13  330.66   73.23
  -3  -7 -14  109.56   44.09
   3  -7  14  325.47  109.10
  -3  -7 -14  324.88   96.53
  -3   7 -14  232.66   84.68
  -3  -7 -15  520.61  175.76
   3  -7  15   81.03   51.86
  -3  -7 -15  397.37  108.38
  -3   7 -15  455.19  126.08
  -3  -7 -16   51.80   62.54
   3  -7  16   66.62   51.59
  -3  -7 -16   60.23   31.38
  -3   7 -16   83.48   40.15
  -3  -7 -17  430.05  107.23
   3  -7  17  513.83  144.79
  -3  -7 -17  336.45  116.02
  -3   7 -17  352.57  143.37
  -3  -7 -18   53.06   65.29
   3  -7  18    5.18   24.33
  -3  -7 -18   36.83   25.00
  -3   7 -18   23.58   12.91
  -3  -7 -19 1542.52  355.68
  -3   7 -20  139.18   66.81
  -3  -7 -20   37.17   50.46
  -3  -7 -21   85.35   78.68
   3  -9 -23  390.65  105.68
  -3  -9  23  403.86  164.11
   3  -9 -22  201.15   62.47
  -3  -9  22  165.06   94.32
   3  -9 -21  856.08  195.58
  -3  -9  21  554.99  243.37
   3  -9 -20  288.90  107.07
  -3  -9  20  287.19  104.04
   3  -9 -19   42.32   60.61
  -3  -9  19   71.78   37.24
   3  -9 -18   54.54   37.84
  -3  -9  18   96.92   41.87
   3   9 -18   41.62   16.23
   3  -9 -17   65.46   51.23
  -3  -9  17   58.99   79.92
   3  -9 -17    4.81   13.05
   3  -9 -16  943.75  289.13
  -3  -9  16 1338.52  348.13
   3  -9 -15 1393.12  219.56
  -3  -9  15 1335.32  320.64
   3  -9 -14   92.53   63.02
  -3  -9  14  144.86   66.73
   3  -9 -13 4653.09  329.51
  -3  -9  13 4338.36  268.60
   3  -9 -12  276.92  145.99
  -3  -9  12  232.21   51.11
   3  -9 -11   69.72   41.63
  -3  -9  11   44.31   36.91
   3  -9 -10  869.03  136.83
  -3  -9  10  829.87  208.30
   3  -9  -8   -6.95   54.77
  -3  -9   8   30.25   26.35
   3  -9  -715790.10  582.49
  -3  -9   715464.70  565.24
   3  -9  -6 2433.32  285.07
  -3  -9   6 2225.82  149.44
   3  -9  -5 4871.42  262.04
  -3  -9   5 5554.58  289.17
   3  -9  -4 2849.96  163.45
  -3  -9   4 3321.14  201.05
   3  -9  -3 1699.38  333.87
  -3  -9   3 1933.43  270.82
   3  -9  -2 2700.65  159.10
  -3  -9   2 2840.95  145.78
   3  -9  -2 2463.66  126.17
   3  -9  -110778.00  316.02
  -3  -9   111265.20  334.87
   3  -9  -110505.50  267.10
  -3   9   110877.20  285.31
  -3  -9   013352.60  377.41
   3  -9   013840.60  376.31
   3  -9   013081.90  334.82
  -3   9   012570.80  332.56
   3  -9   1  442.32  128.02
  -3  -9  -1  458.57  102.08
   3  -9   1  351.23   81.05
  -3   9  -1  417.86   91.94
   3   9   1  311.31   76.50
  -3   9  -1  333.84   69.56
   3  -9   2  568.94  120.85
  -3  -9  -2  508.88  135.39
  -3  -9  -2  494.65   82.21
  -3   9  -2  486.06   86.32
   3  -9   2  325.66  100.34
  -3   9  -2  367.85   79.53
   3   9   2  412.40   73.88
  -3  -9  -3  477.53   77.08
   3  -9   3  464.49  117.70
  -3  -9  -3  376.81   68.37
  -3   9  -3  430.20  101.48
   3  -9   3  258.04  123.87
   3   9   3  319.90   75.60
  -3  -9  -4 3195.89  253.63
   3  -9   4 3185.34  155.63
  -3   9  -4 3101.32  162.14
   3  -9   4 2952.74  190.32
   3   9   4 3271.61  303.69
  -3  -9  -5 7210.91  310.87
   3  -9   5 7548.03  306.58
  -3   9  -5 7651.82  386.74
   3   9   5 7050.33  289.35
  -3  -9  -6 7792.73  332.50
   3  -9   6 7776.22  305.66
  -3   9  -6 7446.41  346.37
  -3  -9  -7 5387.00  379.45
   3  -9   7 4888.56  350.99
  -3   9  -7 5257.39  360.89
  -3  -9  -8 3249.53  213.11
   3  -9   8 3104.84  171.67
  -3   9  -8 3113.00  563.43
  -3  -9  -9 7934.90  432.29
   3  -9   9 8207.46  489.12
  -3   9  -9 8395.91  495.88
  -3  -9 -10 5291.12  599.69
   3  -9  10 5029.45  268.92
  -3   9 -10 4868.83  399.47
  -3  -9 -11  762.63  156.22
  -3   9 -11  933.38  213.40
  -3  -9 -12 4049.49  729.46
   3  -9  12 4838.54  402.78
  -3   9 -12 4566.69  236.89
  -3   9 -12 3800.44  477.43
  -3  -9 -13  567.65  129.28
   3  -9  13  828.07  192.74
  -3   9 -13  643.70  111.43
  -3  -9 -13  723.46  244.15
  -3   9 -13  709.53  225.85
  -3  -9 -14  413.67   70.43
   3  -9  14  341.57   95.10
  -3   9 -14  462.79   73.46
  -3  -9 -14  386.71  119.17
  -3   9 -14  358.00  123.35
  -3  -9 -15 1281.87  309.38
   3  -9  15 1178.78  344.01
  -3   9 -15 1177.84  291.10
  -3  -9 -15 1191.43  296.69
  -3   9 -15 1191.48  296.41
  -3  -9 -16  277.96   73.48
   3  -9  16  217.64  109.19
  -3   9 -16  230.15  102.84
  -3  -9 -16  238.11   64.13
  -3   9 -16  314.94  111.04
  -3  -9 -17  586.10  145.32
   3  -9  17  649.82  256.91
  -3   9 -17  710.68  237.51
  -3  -9 -17  607.17  191.29
  -3   9 -17  477.24  177.58
  -3  -9 -18  901.03  203.63
   3  -9  18  521.88  235.16
  -3   9 -18 1139.68  194.20
  -3   9 -18  660.74  229.01
  -3  -9 -19   18.00   36.69
   3  -9  19   55.35   31.18
  -3   9 -19   16.41   24.89
  -3   9 -19   16.57   14.43
  -3  -9 -20   45.07   34.03
  -3   9 -20   36.33   25.14
  -3 -11  22   70.37   54.93
   3 -11 -21   39.57   41.90
  -3 -11  21    9.28   30.08
   3 -11 -20   82.75   40.65
  -3 -11  20   10.40   27.84
   3 -11 -19    8.81   66.85
  -3 -11  19   17.56   35.12
   3  11 -19   24.04   18.21
   3 -11 -18   28.82   54.57
   3 -11 -17  189.09  124.47
  -3 -11  17  274.70   90.05
   3 -11 -16  169.61   69.88
  -3 -11  16  174.95   79.38
   3 -11 -15  285.64   90.05
  -3 -11  15  176.55   41.02
   3 -11 -14  175.78   73.89
  -3 -11  14  156.90   44.46
   3 -11 -13 4867.89  651.62
  -3 -11  13 4124.27  573.30
   3 -11 -12  139.92   77.37
  -3 -11  12  224.37   85.66
   3 -11 -11 1629.65  336.20
  -3 -11  11 1645.00  488.51
   3 -11 -10 6099.56  395.36
  -3 -11  10 5722.27  452.63
   3 -11  -9  112.88   53.50
  -3 -11   9   -4.42   32.63
   3 -11  -8  416.16   88.72
  -3 -11   8  208.60   85.38
   3 -11  -7  360.67   96.18
   3 -11  -5 7612.11  522.29
   3 -11  -411696.80  585.30
   3  11  -410817.80  319.84
  -3 -11   411219.90  332.10
   3 -11  -3 2800.80  227.20
  -3 -11   3 2493.70  164.73
   3 -11  -3 2417.86  108.60
   3 -11  -2  885.03  183.32
  -3 -11   2  882.75  178.19
   3 -11  -2  670.47   81.79
  -3  11   2  696.12  147.67
   3 -11  -1  115.27   46.98
  -3 -11   1  167.84   68.67
   3 -11  -1  127.75   30.72
  -3  11   1  200.07   50.77
  -3 -11   0 7307.87  332.32
   3 -11   0 7699.09  350.51
   3 -11   0 7255.11  275.06
  -3  11   0 7418.88  291.17
   3 -11   1 5782.64  265.22
  -3 -11  -1 6199.74  301.13
  -3 -11  -1 5593.54  187.94
  -3  11  -1 5719.00  228.18
   3 -11   2 7753.59  332.73
  -3 -11  -2 8480.08  363.72
  -3 -11  -2 7584.51  322.85
  -3  11  -2 7189.67  265.13
   3  11   2 7614.06  259.03
  -3 -11  -3 4764.82  517.19
   3 -11   3 5103.79  326.57
  -3 -11  -3 4850.11  291.30
  -3  11  -3 4676.33  288.09
   3 -11   3 4127.89  253.01
   3  11   3 4726.59  360.28
  -3 -11  -4  429.03  132.55
   3 -11   4  118.58   51.84
  -3 -11  -4  198.78   63.26
  -3  11  -4  252.21   80.01
   3 -11   4  151.56   41.98
   3  11   4  173.00   33.78
  -3 -11  -5 1781.68  325.73
   3 -11   5 1605.65  139.47
  -3  11  -5 1570.38  112.89
   3  11   5 1559.50   79.11
  -3 -11  -6 2366.01  159.49
   3 -11   6 2278.68  149.30
  -3  11  -6 2385.98  146.44
   3  11   6 1930.05  145.31
  -3 -11  -7   54.12   73.06
   3 -11   7  111.56   54.53
  -3  11  -7   80.58   34.80
  -3 -11  -8 5002.58  561.38
  -3  11  -8 4532.08  242.92
  -3 -11  -9  983.64  243.61
  -3  11  -9  728.62  171.77
  -3 -11 -10  673.05  113.52
   3 -11  10  525.50  157.46
  -3  11 -10  445.92  107.42
  -3 -11 -11  323.23   94.98
   3 -11  11  466.01  138.93
  -3  11 -11  316.90   67.45
  -3 -11 -12 3608.49  378.57
   3 -11  12 3847.12  230.83
  -3  11 -12 4043.66  231.07
  -3 -11 -13 1448.73  269.48
   3 -11  13 1405.44  327.70
  -3  11 -13 1393.73  343.97
  -3  11 -13 1726.72  572.52
  -3 -11 -14 1948.04  314.02
   3 -11  14 1872.91  194.45
  -3  11 -14 1777.29  315.92
  -3  11 -14 1852.13  151.73
  -3 -11 -15  204.12   91.42
   3 -11  15  307.10  101.17
  -3  11 -15  403.37   99.71
  -3 -11 -15  191.72   70.14
  -3  11 -15  179.50   94.53
  -3 -11 -16  544.14  114.11
   3 -11  16  584.45  190.73
  -3  11 -16  573.58  194.42
  -3 -11 -16  594.35  171.66
  -3  11 -16  585.42  158.47
  -3 -11 -17   41.51   28.00
   3 -11  17   16.56   21.63
  -3  11 -17   43.86   27.22
  -3 -11 -17   13.88   10.74
  -3  11 -17   17.56   28.26
  -3 -11 -18  246.22   96.21
   3 -11  18  266.23   71.93
  -3  11 -18  141.27   89.75
  -3  11 -18  106.77   50.79
  -3 -11 -19   32.56   16.23
  -3  11 -19   16.38   16.36
  -3  11 -19    6.89   12.28
   3 -13 -21   10.72   29.20
  -3 -13  21   24.78   26.53
   3 -13 -20  139.49   54.22
  -3 -13  20   51.86   47.76
   3 -13 -19   73.03   33.92
  -3 -13  19   61.28   16.60
   3 -13 -18  214.84   76.69
  -3 -13  18   10.27   44.50
   3 -13 -17  236.20   78.89
  -3 -13  17  490.71  101.88
   3 -13 -16  244.32   49.24
  -3 -13  16  349.21   83.44
   3 -13 -15  127.51   83.31
  -3 -13  15  376.00  128.84
   3 -13 -14   94.15   55.08
  -3 -13  14   77.82   52.81
   3 -13 -13  128.94   60.25
  -3 -13  13   88.52   69.54
   3 -13 -12  320.21  116.55
  -3 -13  12  330.57  225.23
   3 -13 -11  136.81   51.75
  -3 -13  11   15.63   28.25
   3 -13 -10  501.40  173.61
  -3 -13  10  633.39  221.21
   3 -13  -9  159.31   91.44
  -3 -13   9  102.72   78.12
   3 -13  -8  445.34  128.78
  -3 -13   8  430.16  159.99
  -3 -13   8  207.14   40.48
   3 -13  -7 3189.96  641.83
  -3 -13   7 3191.10  236.85
  -3 -13   7 2286.05  185.20
   3 -13  -6 1567.71  449.69
  -3 -13   6 1323.28  244.94
  -3 -13   6 1272.85  115.07
   3 -13  -5  534.56  100.12
  -3 -13   5  395.08  128.33
   3 -13  -4   98.45   49.57
  -3 -13   4   12.68   47.52
   3 -13  -4   25.32   12.72
   3 -13  -3  224.74   88.98
  -3 -13   3  129.95   53.88
  -3  13   3   75.03   21.14
  -3 -13   2 7785.33  434.65
   3 -13  -2 7840.06  425.79
   3 -13  -2 7188.14  319.90
  -3  13   2 7472.53  275.95
   3 -13  -1 4057.48  289.82
  -3 -13   1 4171.27  372.77
   3 -13  -1 3917.71  275.33
  -3  13   1 4098.78  268.52
  -3 -13   0   38.68   63.74
  -3  13   0   16.67   13.79
  -3 -13  -1 2135.60  156.57
  -3 -13  -2  940.17  153.95
  -3 -13  -3  257.28  107.23
  -3 -13  -3  194.81   50.45
  -3  13  -3  257.39   46.66
   3  13   3  111.20   30.65
  -3 -13  -4  397.75   89.15
   3 -13   4  471.26  114.34
  -3 -13  -4  334.10   69.57
  -3  13  -4  423.74  113.70
   3 -13   4  259.06   53.98
   3  13   4  286.50   38.98
  -3 -13  -5  478.38  123.69
  -3 -13  -5  323.46   72.26
  -3  13  -5  352.91   86.05
   3  13   5  265.50   67.12
  -3 -13  -6   97.07   46.30
  -3  13  -6   35.92   22.18
   3  13   6    7.30   11.07
  -3 -13  -7  422.57   73.60
   3 -13   7  372.45  108.67
  -3  13  -7  399.29   76.32
  -3 -13  -8  213.13   78.34
   3 -13   8  364.81  126.03
  -3  13  -8  236.88   44.00
  -3 -13  -9  710.39  142.37
   3 -13   9  649.22  165.35
  -3  13  -9  583.95  118.09
  -3 -13 -10 2769.11  586.55
   3 -13  10 2658.05  162.63
  -3  13 -10 2312.53  515.27
  -3 -13 -11   29.33   50.07
   3 -13  11   86.82   43.97
  -3  13 -11   89.74   43.18
  -3 -13 -12  419.29   94.98
   3 -13  12  381.21  228.74
  -3  13 -12  417.98   71.43
  -3 -13 -13  964.91  205.34
   3 -13  13  795.08  298.49
  -3  13 -13  924.97  162.26
  -3 -13 -14   26.27   37.31
   3 -13  14   45.90   20.49
  -3  13 -14   19.48   25.76
  -3  13 -14   78.81   36.25
  -3 -13 -15   28.53   23.51
   3 -13  15   25.53   17.91
  -3  13 -15   -3.67   31.25
  -3  13 -15   37.35   29.80
   3 -13  16   25.12   35.19
  -3  13 -16   46.20   45.51
  -3 -13 -16    4.82   26.09
  -3  13 -16   27.45   13.44
  -3 -13 -17   66.30   52.45
   3 -13  17   40.31   33.43
  -3  13 -17   20.18   17.66
  -3  13 -17   10.69   23.99
  -3 -13 -18   36.02   18.30
   3 -13  18   32.72   20.59
  -3  13 -18   22.96   14.51
  -3  13 -18   16.12   11.03
  -3 -15  20   34.10   17.99
   3 -15 -19   41.20   28.16
  -3 -15  19   34.85   33.56
   3 -15 -18   34.18   69.42
  -3 -15  18   23.00   28.72
   3 -15 -17   58.15   31.86
  -3 -15  17   59.96   40.39
   3 -15 -16   17.97   29.50
  -3 -15  16   45.87   55.74
  -3 -15  15   48.06   41.82
   3 -15 -14   56.02   56.68
  -3 -15  14   97.31   75.00
   3 -15 -13   26.23   58.60
  -3 -15  13  143.14   55.33
   3 -15 -12   14.08   49.81
  -3 -15  12   44.92   82.42
   3 -15 -11 1729.79  343.63
  -3 -15  11 1394.73  416.49
   3 -15 -10 1385.83  223.87
  -3 -15  10 1340.20  333.81
   3  15 -10  685.17  182.36
   3 -15  -9 2385.79  574.08
  -3 -15   9 2300.21  314.98
   3  15  -9 1634.89  247.85
   3 -15  -8  205.06   64.74
  -3 -15   8  147.51   44.96
   3 -15  -7   80.80   63.92
  -3 -15   7   14.04   44.80
   3 -15  -6  153.11   82.33
  -3 -15   6  243.69  100.43
   3 -15  -5 1435.15  419.02
  -3 -15   5 1275.79  292.75
   3 -15  -4 1701.96  474.26
  -3 -15   4 1691.28  440.83
  -3  15   4 1427.05  156.95
   3 -15  -3    2.80   51.94
  -3 -15   3  133.88   90.41
   3 -15  -3   26.65   12.52
  -3  15   3   40.78   15.49
  -3 -15   2  675.66  201.16
   3 -15  -2  351.56  109.23
   3 -15  -2  316.66   93.07
  -3  15   2  474.32   91.82
   3 -15  -1  516.09  116.97
  -3 -15   1  282.01  130.87
  -3  15   1  208.33   79.49
   3 -15   0  138.47   60.94
  -3 -15   0  140.64   69.06
  -3 -15  -1 1787.52  484.69
   3 -15   1 2103.13  193.62
   3 -15   2   74.09   39.42
  -3 -15  -2  335.21  104.59
  -3 -15  -3   70.84   56.44
   3 -15   3   75.78   36.02
  -3 -15  -4   60.99   41.10
   3 -15   4   -0.91   27.01
  -3 -15  -4   20.64    9.16
  -3 -15  -5  497.73  235.44
   3 -15   5  494.83  278.48
  -3 -15  -5  388.14   51.10
  -3  15  -5  536.20  123.77
  -3 -15  -6  474.38   95.36
   3 -15   6  351.45  123.97
  -3 -15  -6  271.25   68.39
  -3  15  -6  303.14   81.98
  -3 -15  -7  165.65   97.99
   3 -15   7  134.95   64.51
  -3 -15  -7   39.50   35.96
  -3  15  -7   51.46   21.86
  -3 -15  -8  436.85   74.37
   3 -15   8  486.98  129.47
  -3 -15  -8  318.77   95.11
  -3  15  -8  462.81   81.07
  -3 -15  -9   18.10   25.55
   3 -15   9   12.15   49.77
  -3  15  -9   12.04   19.28
  -3 -15 -10  205.77   50.67
   3 -15  10  183.43  145.70
  -3  15 -10  168.07   46.29
  -3 -15 -11   19.27   44.45
   3 -15  11   18.56   24.82
  -3  15 -11   12.49   30.37
  -3 -15 -12  244.77   69.74
   3 -15  12  125.43   35.63
  -3  15 -12  104.14   60.94
  -3 -15 -13   65.87   68.57
   3 -15  13   27.28   27.62
  -3  15 -13   25.55   26.92
  -3 -15 -14   68.90   33.99
   3 -15  14   80.55   34.87
  -3  15 -14   59.70   45.42
  -3 -15 -15   54.74   25.85
   3 -15  15   51.59   25.36
  -3  15 -15   31.13   31.27
  -3  15 -15   39.83   16.82
  -3 -15 -16   89.60   41.76
   3 -15  16   15.60   28.59
  -3  15 -16   36.04   15.55
  -3  15 -16   49.25   44.74
  -3 -15 -17   23.00   33.20
   3 -15  17   25.30   16.00
  -3  15 -17    8.32   32.54
  -3  15 -17   36.64   32.47
   3 -17 -18   87.81   45.19
  -3 -17  18   40.79   53.70
   3 -17 -17   52.08   53.75
  -3 -17  17   41.29   29.15
   3 -17 -16  167.50   70.53
  -3 -17  16  365.10   96.97
   3 -17 -15   66.09   65.61
  -3 -17  15   54.88   45.63
   3 -17 -14   38.68   65.92
  -3 -17  14   40.62   30.50
   3 -17 -13   64.03   70.95
  -3 -17  13  371.18   94.89
   3 -17 -12  274.94   99.56
  -3 -17  12  505.68  155.74
   3 -17 -11  216.97   64.17
  -3 -17  11    1.69   46.74
  -3 -17  10  363.40   79.78
   3 -17  -9   88.34   86.47
  -3 -17   9  214.77  149.65
   3 -17  -8   54.16   37.77
  -3 -17   8   12.47   28.96
   3 -17  -7 1583.56  455.66
  -3 -17   7 1434.80  475.28
   3 -17  -6  139.65   84.75
  -3 -17   6  151.39   89.80
   3 -17  -5   -2.94   45.36
  -3 -17   5   38.53   49.04
   3 -17  -4   44.17   25.21
  -3 -17   4   29.00   64.25
   3 -17  -3  141.45   75.39
  -3 -17   3  208.23   76.76
  -3 -17   2 2625.76  675.91
   3 -17  -2 2281.30  490.32
  -3 -17   1  801.36  167.63
   3 -17  -1 1163.15  286.37
   3 -17   0 1227.81  406.52
  -3 -17   0 1477.51  322.77
   3 -17   1   48.70  103.56
   3 -17   2    3.49   44.42
  -3 -17  -2   83.87   51.26
  -3 -17  -3   69.19   52.30
   3 -17   3   43.86   85.02
  -3 -17  -4  239.20   70.87
   3 -17   4  197.25   98.15
  -3 -17  -5  190.81   68.15
   3 -17   5  168.28   47.67
  -3 -17  -6  447.52  224.06
   3 -17   6  629.80  173.72
  -3 -17  -7  912.23  195.94
   3 -17   7  523.59  165.94
  -3 -17  -8  449.15  196.58
   3 -17   8  363.35  138.33
  -3  17  -8  217.78   66.26
  -3 -17  -9  295.31  104.54
   3 -17   9  372.05   82.31
  -3 -17 -10  389.79  108.86
   3 -17  10  396.50  143.46
  -3 -17 -11   22.89   44.43
   3 -17  11    6.03   28.94
  -3 -17 -12   43.61   52.72
   3 -17  12   74.86   59.48
  -3 -17 -13   53.21   29.49
   3 -17  13   12.09   31.90
  -3 -17 -14   85.66   52.15
   3 -17  14   15.70   18.65
  -3 -17 -15   51.40   54.71
   3 -17  15  137.41   70.92
  -3 -19  16  178.94   62.92
   3 -19 -15   42.03   23.36
  -3 -19  15   80.02   49.32
   3 -19 -14   33.21   37.81
  -3 -19  14  143.57   41.32
   3 -19 -13   36.21   53.09
  -3 -19  13   78.23   22.42
   3 -19 -12  196.77   98.91
  -3 -19  12  261.74  101.73
   3 -19 -11  108.08   49.26
  -3 -19  11  113.01   61.16
   3 -19 -10  692.25  172.95
  -3 -19  10  867.56  262.82
   3 -19  -9   34.57   48.42
  -3 -19   9   44.08   40.47
   3 -19  -8  383.90   99.78
  -3 -19   8  581.92  149.37
   3 -19  -7  410.85   95.44
  -3 -19   7  286.73   99.05
   3 -19  -6 1918.91  569.08
  -3 -19   6 1803.31  476.55
   3 -19  -5   44.11   53.36
  -3 -19   5   97.08  125.03
   3 -19  -4 2061.97  505.31
  -3 -19   4 2104.11  410.47
   3 -19  -3  402.58  125.90
  -3 -19   3  311.11   75.25
   3 -19  -2  105.10   50.27
  -3 -19   2   51.64   66.20
   3 -19  -1   90.46   67.88
  -3 -19   1  109.20   67.92
   3 -19   0   67.21   47.91
  -3 -19   0   35.82   54.87
   3 -19   1   30.19   27.40
  -3 -19  -1   76.34   43.81
  -3 -19  -2 1248.91  324.03
   3 -19   2 1139.17  289.41
  -3 -19  -3  850.77  243.95
   3 -19   3  677.42  227.10
  -3 -19  -4 1980.54  371.85
   3 -19   4 1524.90  448.06
  -3 -19  -5 1532.29  330.78
   3 -19   5 1362.44  472.90
  -3 -19  -6  385.04   75.50
   3 -19   6  688.76  202.35
  -3 -19  -7   57.46   55.11
   3 -19   7   45.86   51.46
  -3 -19  -8 1178.22  223.52
   3 -19   8 1200.88  306.11
  -3 -19  -9   85.58  113.02
   3 -19   9  240.73   76.59
  -3 -19 -10  632.96  304.86
   3 -19  10  615.63  203.44
  -3 -19 -11   62.15   35.31
   3 -19  11   22.07   32.44
  -3 -19 -12  517.76  200.06
   3 -19  12  511.69  143.64
  -3 -19 -13   17.45   34.52
   3 -19  13   35.98   48.14
   3 -21 -13  130.60   95.37
  -3 -21  13  176.38   82.27
   3 -21 -12   15.50   54.69
  -3 -21  12   15.88   54.63
   3 -21 -11   76.45   46.12
  -3 -21  11   51.20   68.81
   3 -21 -10  298.52   95.33
  -3 -21  10   41.17   74.36
   3 -21  -9  341.01  163.04
  -3 -21   9  509.34  122.14
   3 -21  -8  164.47   94.82
  -3 -21   8  171.45   64.65
   3 -21  -7 1139.96  343.13
  -3 -21   7 1603.24  386.02
   3 -21  -6  443.27  130.27
  -3 -21   6  300.14   90.52
   3 -21  -5 1101.58  414.25
  -3 -21   5  911.71  240.05
   3 -21  -4  322.24   79.80
  -3 -21   4  597.62  196.58
   3 -21  -3  509.29  146.19
  -3 -21   3  584.18  209.04
   3 -21  -2  140.17   60.81
  -3 -21   2   22.56   65.95
   3 -21  -1   22.16   32.77
  -3 -21   1   61.26   55.34
  -3 -21   0   54.32   44.86
   3 -21   0   42.01   52.68
   3 -21   1  534.79  169.63
  -3 -21  -1  528.39  161.89
  -3 -21  -2   37.98   60.28
   3 -21   2   98.22   66.47
  -3 -21  -3  839.37  234.71
   3 -21   3  896.08  277.25
  -3 -21  -4   87.05   45.19
   3 -21   4   15.42   35.30
  -3 -21  -5  477.04  161.73
   3 -21   5  287.02   71.11
  -3 -21  -6   50.32   40.73
   3 -21   6   41.95   54.39
  -3 -21  -7  505.83  109.82
   3 -21   7  401.07  160.22
  -3 -21  -8   94.38   63.33
   3 -21   8   29.21   25.61
  -3 -21  -9  537.48   94.15
   3 -21   9  396.56  199.79
   3 -21  10  305.49  121.37
   3 -23  -9   70.11   79.77
  -3 -23   9   71.42   51.45
   3 -23  -8  107.77   47.67
  -3 -23   8   25.69   50.88
   3 -23  -7  590.44  118.50
  -3 -23   7 1021.05  376.20
   3 -23  -6  328.55  124.25
  -3 -23   6  329.23  170.67
   3 -23  -5   59.48   70.03
  -3 -23   5   75.47   73.18
   3 -23  -4   21.26   47.04
  -3 -23   4   24.78   45.86
   3 -23  -3  508.31  104.13
  -3 -23   3  470.95  200.95
   3 -23  -2   33.89   45.17
  -3 -23   2   38.18   31.41
   3 -23  -1  147.39  204.61
  -3 -23   1  364.15  198.52
   3 -23   0  292.66  114.50
  -3 -23   0  161.72   73.00
  -3 -23  -1   56.37   48.58
   3 -23   1   57.11   41.16
  -3 -23  -2  381.37  152.20
   3 -23   2  107.52   75.20
  -3 -23  -3  416.12  105.15
   3 -23   3  330.38  122.97
  -3 -23  -4    7.90   34.25
   3 -23   4   77.50   29.30
  -3 -23  -5  471.67  199.25
   3 -23   5  181.04   73.86
  -3 -23  -6   43.76   44.38
   3 -23   6   35.12   22.53
   4   0 -25  124.54   30.12
   4   0 -24   83.97   36.37
   4   0 -23  110.66   59.62
   4   0 -22 1145.64  248.30
   4   0 -21   73.34   34.95
   4   0 -20 2646.74  528.10
   4   0 -19   62.53   51.39
   4   0 -18 6950.80  397.21
   4   0 -17  118.58   67.44
   4   0 -16  586.33  129.45
   4   0 -15   53.04   46.80
  -4   0  13  -37.70   57.41
  -4   0  1261822.90  757.77
  -4   0  11  -57.04   66.03
  -4   0  10 1420.68  288.10
  -4   0   9   -2.73   54.77
  -4   0   8  245.15   76.09
   4   0  -8  347.98   95.01
   4   0  -7    6.93   27.63
  -4   0   7    9.09    5.72
  -4   0   6  856.57  203.99
   4   0  -6  808.44  198.47
  -4   0   6  792.86   43.04
   4   0  -6  834.38   52.61
   4   0  -5   -9.73   35.04
  -4   0   5  -18.73   49.23
  -4   0   5  -12.20   14.80
   4   0  -5   -1.50   13.39
  -4   0   414865.20  279.66
   4   0  -414624.30  237.24
  -4   0   414608.40  199.33
   4   0  -414765.60  215.70
  -4   0   3  -15.13   35.85
   4   0  -3   -2.78   30.39
  -4   0   3   -3.72   18.67
   4   0  -3   10.61   15.81
  -4   0   3   82.16   34.20
   4   0  -292690.10  971.45
  -4   0   292034.40  951.22
  -4   0   288394.00  928.68
   4   0  -291306.30  941.66
   4   0  -1   40.94   20.59
  -4   0   1   30.42   27.09
   4   0  -1   69.81   31.70
  -4   0   1   32.68   24.96
   4   0  -1   84.21   43.82
  -4   0   1  146.29  147.79
   4   0  -1   41.21   30.16
  -4   0   1   26.39   26.43
   4   0   0 3558.20   83.62
   4   0   0 3643.49  134.56
  -4   0   0 3641.90  142.71
  -4   0   0 3642.55  170.19
   4   0   0 3659.53  135.59
  -4   0   0 3664.92  132.96
   4   0   0 3755.12  159.49
   4   0   0 3873.13  131.32
  -4   0   0 3899.14  139.58
   4   0   1   -8.52    4.52
  -4   0  -1  -54.79   50.32
   4   0   1   27.60   20.43
   4   0   1  -38.37   45.36
  -4   0  -1  -34.93   49.41
   4   0   1   12.85   23.52
  -4   0  -1  -22.59   49.62
   4   0   1   31.55   19.40
  -4   0  -1  -17.97   57.94
  -4   0  -258042.40  579.78
  -4   0  -258978.70  706.47
   4   0   257071.30  681.87
  -4   0  -257701.80  765.58
   4   0   259579.00  703.03
  -4   0  -3  -34.71   16.13
  -4   0  -3    9.91    6.31
  -4   0  -3   -7.51   41.77
  -4   0  -3  -26.69   53.70
   4   0   3   64.69   33.90
   4   0   3  -40.17   35.58
  -4   0  -3  -24.43   50.95
   4   0   3   50.09   27.38
  -4   0  -3  -27.06   47.36
  -4   0  -412833.40  370.14
  -4   0  -412503.00  370.26
  -4   0  -412521.60  399.11
   4   0   411762.50  372.30
  -4   0  -412471.90  400.44
   4   0   411515.40  365.37
   4   0   412383.70  383.08
  -4   0  -412403.70  390.25
  -4   0  -5   16.41   16.84
  -4   0  -5   22.69   19.52
   4   0   5   -7.95   28.79
  -4   0  -5   41.23   18.00
   4   0   5   23.38   13.60
   4   0   5  -19.05   29.53
  -4   0  -5   23.09   27.84
  -4   0  -616126.50  399.94
  -4   0  -615722.40  353.75
   4   0   613993.90  354.14
  -4   0  -615822.10  405.30
  -4   0  -614949.90  492.89
  -4   0  -7  -40.75   35.94
  -4   0  -7   13.70   10.71
  -4   0  -7  -63.39   45.04
  -4   0  -7   -4.22   47.88
  -4   0  -8 6985.14  276.15
  -4   0  -8 5887.36  235.59
  -4   0  -8 6659.76  300.86
  -4   0  -8 7304.89  419.82
  -4   0  -9  -12.34   44.69
  -4   0  -9   14.05   10.65
  -4   0  -9   11.39   33.04
  -4   0  -9   -7.72   44.66
  -4   0 -1023971.40  778.32
  -4   0 -1023185.30  771.83
  -4   0 -1024081.20  824.97
  -4   0 -11  -10.02   41.92
  -4   0 -11   61.25   32.68
  -4   0 -11   57.12   42.04
  -4   0 -12  295.33   78.48
  -4   0 -12  386.83   84.44
  -4   0 -12  328.74   88.29
  -4   0 -13   34.86   29.23
  -4   0 -13   49.41   25.03
  -4   0 -13   31.87   18.68
  -4   0 -14 1059.50  336.50
  -4   0 -14 1002.40  311.85
  -4   0 -15   80.64   44.80
  -4   0 -15   66.62   41.70
  -4   0 -16 6562.67  660.23
  -4   0 -17   22.86   32.84
  -4   0 -18  657.82  147.14
  -4   0 -19   46.51   18.66
  -4   0 -20  598.78  192.80
   4  -2 -25  358.23   99.18
   4   2 -25  371.20   97.97
   4  -2 -24   69.68   41.53
   4   2 -24   93.70   53.56
   4  -2 -23   58.32   62.20
   4   2 -23   58.08   66.27
   4  -2 -22  466.71  102.40
   4   2 -22  212.92   95.48
   4  -2 -21 1171.58  211.36
   4   2 -21  965.89  319.24
   4  -2 -20  163.49   62.68
   4   2 -20  450.70   72.30
   4  -2 -19  419.88  100.12
   4   2 -19  510.25  119.00
   4  -2 -18 1037.41  187.40
  -4  -2  18  899.88  219.71
   4  -2 -17   57.12   63.11
  -4  -2  17   54.80   44.20
   4   2 -17    3.71   10.35
   4  -2 -16 1971.69  549.16
  -4  -2  16 2452.49  435.53
  -4  -2  16 1878.24   83.79
   4   2 -16 1694.38  135.85
   4  -2 -15 7240.61  393.85
  -4  -2  15 7448.63  404.00
   4   2 -15 6042.13  313.77
   4  -2 -14  144.50   57.35
  -4  -2  14  149.07   61.32
  -4  -2  14   25.56   16.93
   4   2 -14   20.29   14.75
   4  -2 -13  549.23  111.02
  -4  -2  13  718.63  119.03
  -4  -2  13  451.73   65.82
   4   2 -13  358.73   87.52
   4  -2 -12  508.30   78.02
  -4  -2  12  403.96  170.96
  -4  -2  12  435.28   64.57
   4   2 -12  389.77   61.86
   4  -2 -11  345.31   82.60
  -4  -2  11  209.70   71.26
  -4  -2  11  236.65   50.36
   4  -2 -10  162.94   98.60
  -4  -2  10  157.82   62.09
   4  -2  -9 7600.61  401.87
  -4  -2   9 8726.38  319.18
   4  -2  -819076.90  655.27
   4   2  -817031.50  511.14
  -4  -2   819626.70  586.24
   4  -2  -817410.00  539.72
   4  -2  -7 2608.26  156.48
   4   2  -7 2389.23  135.66
  -4  -2   7 2678.51  164.85
   4  -2  -7 2540.90  145.26
   4  -2  -7 2753.80   85.63
   4  -2  -6 6843.98  212.26
   4   2  -6 6615.77  202.65
  -4  -2   6 7039.90  231.19
   4  -2  -6 6760.84  207.23
   4  -2  -6 6973.04  167.35
   4  -2  -5 4538.17  180.91
  -4  -2   5 4125.96  249.18
   4   2  -5 4383.75  149.93
   4  -2  -5 4063.74  143.44
   4  -2  -5 3958.13  117.56
  -4   2   5 4211.18  162.04
   4  -2  -413847.50  248.58
   4   2  -414432.10  246.54
  -4  -2   413997.50  241.49
   4  -2  -413921.50  202.18
  -4   2   413989.30  250.46
  -4   2   347110.40  543.66
   4  -2  -345776.00  543.36
   4   2  -344607.00  518.73
  -4  -2   347172.10  564.23
   4  -2  -2 6697.65  187.61
   4   2  -2 6620.90  173.00
  -4  -2   2 6474.82  172.51
   4   2  -2 6144.65  166.02
  -4   2   2 6760.31  228.80
   4  -2  -2 6521.97  179.98
  -4   2   2 6697.38  207.62
  -4   2   1 9533.59  219.92
   4  -2  -1 9655.77  218.89
   4   2  -1 9451.65  283.20
  -4  -2   1 9720.30  246.63
   4  -2  -1 9405.32  251.63
   4   2  -1 9319.97  264.55
  -4  -2   1 9712.88  246.60
  -4   2   1 9513.03  246.29
   4  -2  -110207.80  311.02
  -4   2   1 9907.09  284.30
  -4  -2   1 9763.08  322.25
  -4   2   1 9811.98  258.21
  -4   2   1 9486.19  246.51
  -4   2   0 9138.08  198.20
   4   2   0 8969.84  215.96
   4  -2   0 9446.71  210.31
  -4  -2   0 9481.20  223.77
   4  -2   0 9462.69  247.80
   4   2   0 8954.79  260.74
  -4   2   0 9397.31  262.24
  -4  -2   0 9540.07  245.90
  -4   2   0 8747.06  238.53
   4  -2   0 8507.09  229.62
   4  -2   0 8781.44  233.60
  -4   2   0 8928.97  239.81
   4   2   0 9209.34  233.81
  -4  -2   0 9754.83  247.54
  -4   2   0 8456.56  235.82
  -4   2  -1 1920.13   45.04
   4   2   1 1906.34   58.53
  -4  -2  -1 2065.38   62.31
   4  -2   1 2102.71   77.57
  -4  -2  -1 2122.49  155.07
   4   2   1 1879.31   77.24
   4  -2   1 2188.02   90.36
  -4   2  -1 1912.83  203.36
  -4   2  -1 2035.09   98.04
   4  -2   1 1872.87   81.79
   4   2   1 1889.40  100.91
   4  -2   1 2070.48  141.67
  -4  -2  -1 1933.31   93.56
  -4   2  -1 2091.32   96.88
  -4   2  -1 1960.32  177.41
   4   2   1 1939.86  134.17
   4   2   2 5319.36  143.02
  -4  -2  -2 5261.99  144.31
  -4   2  -2 5363.97  130.90
   4  -2   2 5163.21  135.16
  -4   2  -2 5104.75  171.01
   4  -2   2 5424.95  204.03
  -4  -2  -2 5440.80  281.59
  -4   2  -2 5544.31  183.25
   4  -2   2 5361.62  174.59
   4  -2   2 4997.23  166.15
  -4   2  -2 5102.49  174.79
  -4  -2  -2 5290.58  180.96
   4   2   2 5176.39  166.60
  -4   2  -2 5253.57  179.88
   4   2   2 5531.60  184.80
   4   2   3 4157.95  127.08
  -4  -2  -3 4201.93  129.27
  -4   2  -3 4343.52  115.92
   4  -2   3 4288.02  123.48
  -4   2  -3 4240.11  161.39
  -4  -2  -3 3810.03  147.32
  -4  -2  -3 3990.02  157.20
   4  -2   3 4103.04  153.81
  -4   2  -3 4500.35  168.52
  -4   2  -3 3960.57  170.50
   4  -2   3 4149.87  247.86
   4   2   3 4036.44  197.72
  -4   2  -3 4261.08  169.52
   4   2   3 4047.57  163.42
   4   2   4 1124.47   58.46
  -4  -2  -4 1190.85   93.69
  -4   2  -4 1047.39   90.98
   4  -2   4 1153.00   51.08
  -4  -2  -4 1214.73  284.29
  -4   2  -4 1138.87  291.71
  -4  -2  -4 1209.32  311.77
   4  -2   4 1268.62  109.51
  -4   2  -4 1110.72  127.00
   4   2   4  966.32   83.11
   4  -2   4 1054.67  228.11
  -4   2  -4 1050.95   92.37
   4   2   4  936.99  261.16
   4   2   5 5362.42  296.33
  -4  -2  -5 6071.51  290.96
  -4   2  -5 5520.47  248.32
   4  -2   5 5813.60  260.62
  -4   2  -5 5539.87  279.76
  -4  -2  -5 5332.41  308.79
   4  -2   5 5398.53  287.71
  -4   2  -5 6155.80  409.25
   4   2   5 5010.75  402.33
  -4   2  -5 5903.01  292.12
  -4  -2  -6 1965.14  158.20
  -4   2  -6 1878.17  145.59
   4  -2   6 1952.57   82.60
  -4  -2  -6 1976.32  158.35
  -4   2  -6 1800.56  187.66
  -4   2  -6 1880.12  167.21
   4   2   6 1699.42  150.40
  -4  -2  -7 1148.55   82.53
  -4   2  -7  942.85   65.62
   4  -2   7 1119.46   72.30
  -4  -2  -7  865.07   65.54
  -4  -2  -7 1237.32  301.58
  -4   2  -7 1245.92  305.82
  -4   2  -7 1338.18  127.07
  -4  -2  -812292.30  431.02
  -4   2  -812508.00  423.08
  -4  -2  -811495.60  406.50
   4  -2   812632.50  441.44
  -4  -2  -812592.00  489.05
  -4   2  -814074.20  735.25
  -4   2  -813421.10  482.69
  -4  -2  -9 3520.64  272.46
  -4   2  -9 2812.51  200.32
  -4  -2  -9 3145.68  217.65
  -4   2  -9 3042.22  309.43
  -4   2  -9 3457.17  236.73
  -4   2 -1010606.50  381.18
  -4  -2 -1010911.00  474.29
  -4  -2 -1011639.40  502.31
  -4   2 -1010826.00  457.54
  -4   2 -1011073.40  414.43
  -4   2 -11 1132.10  228.84
  -4  -2 -11  969.35  184.22
  -4  -2 -11  919.57  175.58
  -4   2 -11  797.53  257.87
  -4   2 -12 3271.58  177.45
  -4  -2 -12 3041.99  190.22
  -4  -2 -12 3329.76  179.67
  -4   2 -12 3284.10  165.44
  -4   2 -13 4929.36  493.72
  -4  -2 -13 4587.67  579.52
  -4  -2 -13 4858.32  281.06
  -4   2 -14  519.48  124.88
  -4  -2 -14  407.69   67.18
  -4  -2 -14  522.25  110.82
  -4   2 -14  353.77  106.32
  -4   2 -15 1396.99  252.91
  -4  -2 -15 1198.21  145.72
  -4  -2 -15 1586.79  276.17
  -4   2 -15 2032.35  191.90
  -4   2 -16  287.13   63.22
  -4  -2 -16  234.13   85.94
  -4  -2 -16  174.29   55.41
  -4   2 -16  187.45   77.06
  -4   2 -17  288.90   76.49
  -4  -2 -17  228.70   79.05
  -4  -2 -17  141.23   26.19
  -4   2 -17  178.60   77.39
  -4   2 -18    6.27   28.00
  -4  -2 -18   34.43   27.03
  -4  -2 -18   90.86   38.53
  -4   2 -19   13.31   25.79
  -4  -2 -19   69.67   35.19
  -4   2 -20  410.15  133.38
  -4  -2 -20  519.51  173.59
  -4  -2 -21   44.46   30.35
   4   4 -25  662.94  154.26
   4  -4 -25  563.44  166.07
   4   4 -24   29.61   33.00
   4  -4 -24  103.41   64.47
   4   4 -23   37.36   46.98
   4  -4 -23  128.32   53.53
   4  -4 -22   48.81   55.17
   4   4 -22  128.45   62.02
   4  -4 -21  476.12  219.09
  -4  -4  21  577.19  228.82
   4  -4 -20    8.44   47.46
  -4  -4  20   17.83   41.24
   4  -4 -19 1541.42  453.30
  -4  -4  19 1588.69  206.78
   4  -4 -18  118.74   87.35
  -4  -4  18   34.93   31.16
   4   4 -18   41.15   28.37
   4  -4 -17   61.82   76.16
  -4  -4  17   97.06   67.73
   4   4 -17   13.42   22.64
   4  -4 -16  123.07   57.31
  -4  -4  16   67.24   65.68
  -4  -4  16    6.57   15.67
   4   4 -16   11.76   10.56
   4  -4 -15 1038.35  226.85
  -4  -4  15  566.48  111.61
  -4  -4  15  251.70  108.52
   4   4 -15  666.03  163.25
   4  -4 -14 2845.33  527.52
  -4  -4  14 2886.55  361.02
  -4  -4  14 2495.40  143.46
   4   4 -14 2377.90  156.44
   4  -4 -13 1203.10  308.98
  -4  -4  13 1035.72  130.81
  -4   4  13  929.07   53.53
   4  -4 -12   65.15   36.39
  -4  -4  12   37.34   23.78
  -4   4  12   12.04    7.10
   4  -4 -11   64.55   57.45
  -4  -4  11   83.64   50.23
   4  -4 -10   97.62   42.68
  -4  -4  10  129.59   99.21
   4  -4  -9 4595.22  352.02
  -4  -4   9 4695.49  247.73
   4  -4  -8 3961.97  270.08
  -4  -4   8 3904.05  233.67
   4  -4  -7 1783.37  218.74
  -4   4   7 1476.88  333.56
   4   4  -7 1410.97   84.02
  -4  -4   7 1735.79  131.11
  -4   4   6 2700.41  243.99
   4  -4  -6 2665.49  130.49
   4   4  -6 2627.95  140.80
  -4  -4   6 2747.63  238.57
  -4   4   5 3884.27  174.05
   4  -4  -5 4301.83  163.85
   4   4  -5 3787.15  189.37
  -4  -4   5 4157.37  168.09
  -4   4   416028.60  273.96
   4  -4  -416037.50  288.35
   4   4  -416024.90  327.30
  -4  -4   415686.90  364.74
   4  -4  -3 4042.01  168.30
  -4   4   3 3872.08  132.29
   4   4  -3 4067.48  143.68
  -4  -4   3 4010.51  174.28
   4  -4  -2 3531.53  199.96
  -4   4   2 3355.85  132.61
   4   4  -2 3505.24  126.23
  -4  -4   2 3584.36  168.53
   4   4  -2 3426.36  107.78
   4  -4  -2 3392.88  140.50
  -4   4   1 6312.27  176.90
   4  -4  -1 6361.13  176.51
  -4  -4   1 6344.30  186.95
   4   4  -1 6684.34  192.53
   4   4  -1 6525.13  176.78
  -4  -4   1 6508.47  171.68
   4  -4  -1 6365.94  190.27
  -4   4   1 6385.54  197.39
  -4  -4   1 6495.47  172.96
  -4   4   0 3901.32  120.24
   4   4   0 3952.44  132.16
   4  -4   0 4057.54  134.78
  -4  -4   0 4530.28  287.66
   4   4   0 3749.69  142.01
   4  -4   0 3947.06  170.65
  -4  -4   0 4024.92  143.36
  -4   4   0 3873.61  145.83
   4  -4   0 3924.88  143.46
  -4   4   0 4063.14  159.22
   4   4   0 3942.29  130.25
  -4  -4   0 4030.07  129.37
   4   4   1 6066.36  302.32
  -4   4  -1 5611.81  157.14
   4  -4   1 5916.31  164.52
  -4  -4  -1 5807.72  225.14
   4  -4   1 5666.84  178.87
  -4  -4  -1 5946.08  241.34
  -4   4  -1 5746.36  181.62
   4  -4   1 5509.81  223.12
   4   4   1 5512.08  166.20
   4  -4   1 5616.32  177.74
  -4  -4  -1 5461.78  165.41
  -4   4  -1 5940.33  188.28
   4   4   2 3202.69  117.27
  -4  -4  -2 3182.39  153.28
  -4   4  -2 3098.91  110.81
   4  -4   2 3193.00  105.57
  -4   4  -2 3223.81  134.26
  -4  -4  -2 2985.79  141.64
   4  -4   2 3096.61  127.14
   4  -4   2 3155.87  212.36
   4  -4   2 3168.16  170.29
  -4   4  -2 3248.65  134.66
   4   4   2 2935.68  114.41
   4   4   3 3036.26  250.30
  -4  -4  -3 3016.16  162.21
  -4   4  -3 2697.23  138.94
   4  -4   3 2737.66  179.27
  -4   4  -3 3060.48  199.29
  -4  -4  -3 2983.66  162.29
   4  -4   3 3037.96  175.20
   4   4   3 2576.67  146.36
   4  -4   3 2832.46  158.02
  -4   4  -3 2842.19  164.29
  -4   4  -3 3092.33  183.12
   4   4   4 2279.07  102.54
  -4  -4  -4 2243.65   95.02
  -4   4  -4 2352.56  172.44
   4  -4   4 2388.39  124.97
  -4   4  -4 2271.32  371.26
   4  -4   4 2324.78  148.65
   4   4   4 2290.64  142.17
   4  -4   4 2046.92  203.57
  -4   4  -4 2372.58  165.60
   4   4   4 2418.15  145.53
   4   4   5 6728.75  300.86
  -4  -4  -5 7469.05  251.36
  -4   4  -5 7120.44  311.17
   4  -4   5 7589.05  173.98
  -4   4  -5 7198.20  336.54
   4   4   5 6564.28  319.10
  -4   4  -5 7345.52  250.15
   4   4   6 4605.19  380.47
  -4  -4  -6 5171.36  303.67
  -4   4  -6 4151.07  199.19
   4  -4   6 4479.41  212.81
  -4   4  -6 4295.07  232.35
  -4   4  -6 4876.65  257.31
   4   4   7 1911.22  170.29
  -4  -4  -7 2049.17  257.78
  -4   4  -7 2064.61  167.80
   4  -4   7 2126.75  108.14
  -4   4  -7 2044.38  134.87
  -4  -4  -7 2146.46  128.17
  -4   4  -7 2110.77  133.05
  -4  -4  -8  801.26  158.86
  -4   4  -8  504.64  133.17
   4  -4   8  732.82  200.09
  -4  -4  -8  739.64  121.41
  -4   4  -8  670.95  181.53
  -4  -4  -9  831.53  177.25
  -4   4  -9  438.40  107.37
   4  -4   9  747.05  197.19
  -4  -4  -9  643.59  121.55
  -4   4  -9  602.53  170.92
  -4  -4 -10 2458.18  398.19
   4  -4  10 2605.12  164.04
  -4  -4 -10 2578.42  161.77
  -4   4 -10 2357.56  149.61
  -4  -4 -11  182.87   43.81
   4  -4  11  194.52   85.21
  -4  -4 -11  252.99   52.73
  -4   4 -11  246.58   79.57
  -4  -4 -12 2441.70  135.20
   4  -4  12 2195.37  441.35
  -4  -4 -12 2644.76  135.58
  -4  -4 -13 1706.48  352.71
   4  -4  13 1672.93  217.41
  -4  -4 -13 1375.82  309.96
  -4   4 -13 1434.48  406.03
  -4  -4 -14  109.81   47.12
  -4  -4 -14  131.66   39.09
  -4   4 -14  125.21   49.47
  -4   4 -15  724.98  175.19
  -4  -4 -15  699.22  126.58
  -4  -4 -15  602.02  102.24
  -4   4 -15  647.25  172.38
  -4   4 -16 1631.01  307.97
  -4  -4 -16 1425.27  299.31
  -4  -4 -16 1603.10  305.63
  -4   4 -16 1404.39  391.25
  -4   4 -17 1271.63  252.31
  -4  -4 -17 1285.06  195.71
  -4  -4 -17 1320.17  261.17
  -4   4 -17 1212.38  289.55
  -4   4 -18   93.46   50.78
  -4  -4 -18   19.67   25.77
  -4  -4 -18   22.23   33.88
  -4   4 -18   81.56   24.95
  -4   4 -19  205.59   87.98
  -4  -4 -19  293.97   81.84
  -4  -4 -20    3.11   16.64
  -4  -4 -21    9.11   17.79
   4  -6 -24   54.08   37.38
   4  -6 -23  158.13   50.14
  -4  -6  23  199.11  121.10
   4  -6 -22  109.52   72.21
  -4  -6  22  230.72   87.40
   4  -6 -21   65.53   69.87
  -4  -6  21   81.58   39.03
   4  -6 -20   48.18   29.74
  -4  -6  20   42.92   32.47
   4  -6 -19   80.78   96.76
  -4  -6  19   55.23   39.43
   4  -6 -18  124.05   55.51
  -4  -6  18   42.49   43.46
   4   6 -18   54.92   24.41
   4  -6 -17 1213.79  265.58
  -4  -6  17 1172.19  326.57
   4   6 -17  891.10  186.96
   4  -6 -16  106.70   65.26
  -4  -6  16   30.53   88.66
   4  -6 -15  109.34   69.34
  -4  -6  15   81.91   48.54
   4  -6 -15   22.71   13.11
  -4   6  15    9.73    9.32
   4  -6 -14  252.12  115.02
  -4  -6  14  487.04  134.91
  -4   6  14  280.42   70.80
   4  -6 -13 1860.34  322.48
  -4  -6  13 2425.95  277.45
   4  -6 -12 5754.08  655.13
   4  -6 -11  214.38   58.92
  -4  -6  11  113.88   34.44
   4  -6 -10  163.29   63.60
  -4  -6  10   52.58   43.75
   4  -6  -9 5230.29  285.01
  -4  -6   9 5150.68  458.19
   4  -6  -8 3681.02  413.04
  -4  -6   8 3532.63  242.64
   4  -6  -7 1433.57  264.86
  -4  -6   7 1267.16  327.42
   4  -6  -617867.50  605.95
  -4  -6   618125.20  627.73
  -4   6   5  643.00  124.90
   4  -6  -5  998.97  273.91
   4   6  -5  688.69   95.62
  -4  -6   5  765.88  184.62
   4  -6  -4  246.40   75.13
  -4   6   4  318.60   71.08
   4   6  -4  264.33   64.02
  -4  -6   4  191.43   89.86
  -4   6   3 1435.84  123.42
   4  -6  -3 1387.43  147.94
   4   6  -3 1215.77   83.90
  -4  -6   3 1373.80  103.40
  -4   6   2 1067.40  240.15
   4  -6  -2 1079.38  256.68
   4   6  -2 1022.57   76.86
  -4  -6   2 1068.98  130.39
   4   6  -2  964.27   67.25
   4  -6  -2  883.30   67.59
  -4  -6   2 1037.30   72.51
  -4   6   1 1947.75   93.86
   4  -6  -1 1703.76  119.65
   4   6  -1 1777.48  123.28
  -4  -6   1 1991.11  233.23
   4   6  -1 1800.69  124.82
   4  -6  -1 1901.69  113.82
  -4   6   1 1675.49  103.26
  -4  -6   1 1693.51   58.79
  -4   6   0 4611.19  221.32
   4   6   0 4733.41  234.70
   4  -6   0 5002.85  239.40
  -4  -6   0 4947.75  245.03
   4  -6   0 4798.40  226.53
  -4  -6   0 4762.40  221.23
  -4   6   0 4549.22  224.22
   4   6   0 4756.68  212.79
  -4   6   0 4846.89  231.21
  -4  -6   0 4621.31  209.63
  -4   6  -1  339.99   79.30
   4   6   1  428.52   95.25
   4  -6   1  350.49   55.44
  -4  -6  -1  445.63   68.74
   4  -6   1  439.86  110.17
  -4  -6  -1  434.10   71.63
  -4   6  -1  597.91  118.64
   4  -6   1  369.76   77.11
   4   6   1  389.22   91.10
  -4   6  -1  431.86   95.00
  -4  -6  -2 2120.88  113.57
   4   6   2 1996.94  113.32
  -4   6  -2 1816.99  148.00
   4  -6   2 1734.99   83.94
  -4  -6  -2 1758.03  184.40
   4  -6   2 1824.52  147.37
  -4   6  -2 1974.00  112.76
   4  -6   2 1558.05  113.25
   4   6   2 1899.09   89.64
  -4   6  -2 1904.34  235.95
   4   6   312573.80  391.73
  -4  -6  -312999.70  409.13
  -4   6  -312919.50  383.75
   4  -6   312554.90  431.82
  -4  -6  -312883.00  412.77
  -4   6  -312794.90  453.60
   4  -6   311622.90  423.50
  -4   6  -313005.60  407.58
   4   6   312083.40  367.64
   4   6   4  214.19   39.26
  -4  -6  -4  486.53   99.25
  -4   6  -4  266.45   55.85
   4  -6   4  350.42  146.17
  -4   6  -4  506.98  111.04
  -4  -6  -4  295.49   85.61
   4   6   4  253.60   64.54
   4  -6   4  222.48   79.71
   4   6   5 2174.10  101.03
  -4  -6  -5 2416.14  175.80
  -4   6  -5 2165.62  199.53
   4  -6   5 2345.57  107.28
  -4   6  -5 2318.85  166.94
   4   6   5 2042.68  103.39
  -4  -6  -6  170.07   49.88
  -4   6  -6   64.07   28.73
   4  -6   6  128.40   49.40
  -4   6  -6    8.44   49.68
  -4  -6  -7   54.45   19.77
  -4   6  -7   35.91   26.77
   4  -6   7  231.77  145.91
  -4   6  -7   92.97   61.73
  -4   6  -7  101.03   58.90
  -4  -6  -8 2550.11  135.04
   4  -6   8 2392.45  145.38
  -4   6  -8 2315.89  166.07
  -4   6  -8 2497.32  192.24
  -4  -6  -9 2126.91  395.47
   4  -6   9 2014.20  142.59
  -4   6  -9 2360.13  415.86
  -4  -6  -9 2465.22  250.85
  -4   6  -9 2028.28  287.65
  -4  -6 -10 4208.24  222.65
   4  -6  10 3924.93  195.00
  -4   6 -10 4261.69  571.66
  -4  -6 -10 4477.17  430.83
  -4  -6 -11  200.45   37.74
   4  -6  11  167.99   58.03
  -4  -6 -11  112.84   36.56
  -4   6 -11  210.18   82.31
  -4  -6 -12   29.40   40.40
   4  -6  12   22.57   35.34
  -4  -6 -12  104.33   60.95
  -4   6 -12   79.10   23.38
  -4  -6 -13  185.99   61.80
   4  -6  13  147.03   47.49
  -4  -6 -13  165.59   54.29
  -4   6 -13  146.87  113.50
  -4  -6 -14   68.10   43.24
  -4  -6 -14   49.72   51.43
  -4   6 -14  138.49   49.90
  -4  -6 -15  100.58   68.46
   4  -6  15  175.79   43.99
  -4  -6 -15   88.83   39.36
  -4   6 -15  170.69   53.91
  -4  -6 -16   71.18   50.28
   4  -6  16   79.69   38.51
  -4  -6 -16   77.31   38.56
  -4   6 -16  138.24   69.07
  -4  -6 -17   12.27   35.94
  -4  -6 -17   73.71   27.08
  -4   6 -17   30.05   20.40
  -4   6 -18   49.82   34.26
  -4  -6 -18   25.61   29.08
  -4  -6 -18   14.53   13.86
  -4   6 -18   17.24   21.27
  -4   6 -19   16.63   33.89
  -4  -6 -19    3.74   32.67
  -4   6 -19  123.09   38.35
  -4  -6 -20   46.78   40.41
  -4   6 -20   60.81   38.32
   4  -8 -24   63.14   56.58
  -4  -8  24   31.87   63.12
   4  -8 -23    6.00   43.26
  -4  -8  23   46.17   49.31
   4  -8 -22  210.07   55.02
  -4  -8  22  274.56  186.06
   4  -8 -21   97.17   76.48
  -4  -8  21   30.57   27.73
   4  -8 -20 1731.61  338.23
  -4  -8  20 1386.05  402.52
   4  -8 -19   36.20   82.80
  -4  -8  19   63.11   45.72
   4  -8 -18   82.48   52.22
  -4  -8  18   13.74   33.86
   4   8 -18   18.14   12.39
   4  -8 -17  159.53   84.84
  -4  -8  17  172.86   42.58
   4  -8 -17   49.76   20.51
   4  -8 -16 6902.05  502.75
  -4  -8  16 7229.87  353.30
   4  -8 -15   68.56   43.41
  -4  -8  15  190.45   98.50
   4  -8 -14  476.88  195.39
  -4  -8  14  504.11  185.60
   4  -8 -13 1092.67  222.50
  -4  -8  13  887.57  295.24
   4  -8 -12 7580.04  608.35
  -4  -8  12 8000.31  428.09
   4  -8 -11  340.81   90.43
  -4  -8  11  371.14   90.29
   4  -8  -9  187.85   62.63
  -4  -8   9  140.27   62.88
   4  -8  -8 1865.96  421.38
  -4  -8   8 1860.09  122.27
   4  -8  -7 1107.72  209.14
  -4  -8   7  961.43  243.22
   4  -8  -610801.10  488.18
  -4  -8   610672.70  331.87
   4  -8  -5 2452.28  458.13
  -4  -8   5 2592.25  287.12
   4  -8  -4   28.87   31.55
  -4  -8   4   56.39   40.59
   4  -8  -3 3176.19  185.66
  -4  -8   3 3039.34  188.57
   4   8  -3 3007.54  137.41
  -4   8   2  942.19   82.51
   4  -8  -2 1134.04  221.08
  -4  -8   2 1113.43  160.78
   4   8  -2  964.89   71.07
   4  -8  -2 1152.09   80.25
  -4   8   2  989.23   74.35
   4  -8  -1 1224.42   91.30
  -4   8   1 1279.55  261.64
  -4  -8   1 1407.54  142.99
   4  -8  -1 1450.00   74.22
  -4   8   1 1411.58   85.17
  -4   8   0  426.36  117.31
  -4  -8   0  750.30  124.09
   4  -8   0  658.40  165.40
   4  -8   0  462.32  110.95
  -4  -8   0  560.64   68.13
  -4   8   0  669.78  112.80
  -4   8  -1 3478.62  253.72
   4  -8   1 3966.22  241.36
  -4  -8  -1 4172.57  231.42
  -4  -8  -1 4088.03  194.13
   4  -8   1 4099.45  235.86
  -4   8  -1 3999.71  243.53
   4   8   1 3808.71  212.26
  -4   8  -1 4037.20  226.16
  -4   8  -2  802.53   63.03
   4  -8   2 1089.45   89.29
  -4  -8  -2 1004.18  287.73
  -4  -8  -2  889.85   77.01
  -4   8  -2  967.82  190.77
   4  -8   2  761.10  188.29
   4   8   2 1097.60  134.76
  -4   8  -2  950.44  231.61
  -4  -8  -3 3279.03  357.76
  -4   8  -3 2755.65  189.09
   4  -8   3 3330.27  265.70
  -4   8  -3 3117.55  176.15
  -4  -8  -3 3064.84  161.81
   4  -8   3 2613.13  184.39
   4   8   3 2888.77   99.80
  -4   8  -3 3213.54  211.99
  -4  -8  -4   64.18   48.29
  -4   8  -4   16.41   15.02
   4  -8   4   64.07   37.96
  -4  -8  -4   81.70   43.39
  -4   8  -4   30.76   22.67
   4  -8   4   40.05   19.51
  -4  -8  -5 2151.83  133.14
   4  -8   5 2307.90  123.69
  -4   8  -5 2116.71  132.11
   4   8   5 1761.96  111.01
  -4  -8  -6  465.23   80.60
   4  -8   6  367.60   87.47
  -4   8  -6  335.19   95.21
  -4  -8  -7 1002.44  194.75
   4  -8   7 1089.76  268.97
  -4   8  -7  841.21  226.31
  -4  -8  -8 3294.44  377.73
   4  -8   8 3152.91  272.04
  -4   8  -8 3126.14  214.91
  -4  -8  -9   64.01   29.63
   4  -8   9   50.63   33.76
  -4   8  -9   -5.11   46.12
  -4   8  -9    4.42   30.33
  -4  -8 -10  956.48  172.31
   4  -8  10 1021.68  260.27
  -4   8 -10 1091.59  187.72
  -4   8 -10  991.67  295.30
  -4  -8 -11  700.74  105.54
   4  -8  11  666.52  177.76
  -4   8 -11  651.80  154.98
  -4  -8 -11  559.94  153.89
  -4   8 -11  555.32  193.26
  -4  -8 -12  602.99   97.81
  -4   8 -12  344.07  149.50
  -4  -8 -12  644.14  115.11
  -4   8 -12  626.34  155.60
  -4  -8 -13  762.59  115.14
   4  -8  13  591.36  160.20
  -4   8 -13  794.57  159.11
  -4  -8 -13  683.38  140.30
  -4   8 -13  630.72  234.49
  -4  -8 -14  439.49  104.12
   4  -8  14  419.29   81.90
  -4   8 -14  483.73  103.28
  -4  -8 -14  387.26  103.19
  -4   8 -14  346.41   97.57
  -4  -8 -15  168.99   46.89
   4  -8  15  189.81   64.60
  -4   8 -15   40.84   38.73
  -4  -8 -15  174.63   52.78
  -4   8 -15  109.04   44.06
  -4  -8 -16 1164.68  205.40
   4  -8  16  951.26  378.54
  -4   8 -16 1179.11  392.45
  -4  -8 -16 1143.42  317.41
  -4   8 -16  777.14  396.49
  -4  -8 -17  230.13   59.27
   4  -8  17  206.15   54.78
  -4   8 -17  324.91  142.74
  -4  -8 -17  149.43   58.96
  -4   8 -17  179.03   49.89
  -4  -8 -18  117.05   36.68
   4  -8  18   68.29   56.29
  -4   8 -18  198.21   69.74
  -4   8 -18  109.71   67.31
  -4  -8 -19   71.36   50.65
  -4   8 -19  286.01  111.44
  -4  -8 -20    8.19   19.54
  -4   8 -20   33.21   36.27
   4 -10 -23   57.74   61.31
  -4 -10  23   58.39   42.59
   4 -10 -22   68.53   56.75
  -4 -10  22   26.66   47.43
   4 -10 -21  856.18  343.19
  -4 -10  21  851.57  266.69
   4 -10 -20   51.00   60.75
  -4 -10  20   72.42   34.13
   4 -10 -19  701.99  244.37
  -4 -10  19  705.24  195.59
   4 -10 -18 1375.64  399.67
  -4 -10  18 1175.35  364.76
   4 -10 -17 1089.45  194.92
  -4 -10  17  832.66  169.27
   4 -10 -16  439.52   80.16
  -4 -10  16  383.23  137.88
   4 -10 -15  487.63  147.89
  -4 -10  15  250.62   99.75
   4 -10 -14 5438.56  409.05
  -4 -10  14 5796.83  502.11
   4 -10 -13   71.61   61.28
  -4 -10  13   48.51   20.96
   4 -10 -12  268.38   76.23
  -4 -10  12  341.92  152.80
   4 -10 -11 4619.68  285.95
  -4 -10  11 5480.89  534.84
   4 -10 -10  270.00   82.02
  -4 -10  10  302.77   60.02
   4 -10  -9 2175.89  173.18
  -4 -10   9 2325.88  188.57
   4 -10  -7  235.53   74.15
   4 -10  -6 8354.77  352.46
  -4 -10   6 8225.15  369.97
   4 -10  -5 5146.07  226.98
  -4 -10   5 5979.30  291.76
   4 -10  -4    9.21   54.14
  -4 -10   4    9.64   39.11
   4  10  -4    0.83   11.49
   4 -10  -3 1148.85  273.22
  -4 -10   3  817.05  204.49
   4  10  -3  651.83   57.77
   4 -10  -3  821.24  178.57
  -4 -10   3  774.43   56.55
   4 -10  -2   44.74   30.07
  -4 -10   2  -12.06   60.39
   4 -10  -2   15.58   18.73
  -4  10   2   24.17   16.35
   4 -10  -1  973.19  183.61
  -4 -10   1  814.95  171.56
   4 -10  -1  726.05  126.65
  -4  10   1  686.11  161.20
  -4 -10   0  935.83  230.97
   4 -10   0  810.49  133.29
   4 -10   0  627.32  168.37
  -4  10   0  789.16  160.72
   4 -10   1  433.54  146.66
  -4 -10  -1  503.75  110.52
   4 -10   1  330.87   51.76
  -4 -10  -1  381.59   53.11
   4  10   1  311.27   39.23
  -4  10  -1  494.66   71.11
  -4 -10  -2  649.79  158.44
   4 -10   2  630.49  179.80
  -4 -10  -2  669.48  119.12
  -4  10  -2  788.50  108.39
   4  10   2  647.80   48.36
  -4  10  -2  652.58  153.59
  -4 -10  -3 5039.96  312.31
   4 -10   3 5352.34  230.50
  -4 -10  -3 5419.31  165.89
  -4  10  -3 5450.33  162.22
   4 -10   3 4763.19  176.91
   4  10   3 5280.58  134.25
  -4 -10  -4  702.82  128.37
   4 -10   4  718.36  208.93
  -4 -10  -4  748.11  163.02
  -4  10  -4  792.73  199.91
   4  10   4  651.46   70.54
  -4 -10  -5 4711.93  322.56
   4 -10   5 3845.56  349.12
  -4  10  -5 4294.87  368.09
  -4 -10  -5 4229.91  269.60
   4  10   5 3861.66  271.52
   4 -10   6  142.00   73.91
  -4  10  -6  118.93   65.98
  -4 -10  -7 2066.47  134.88
   4 -10   7 1703.38  146.69
  -4  10  -7 1821.47  324.18
  -4 -10  -8  476.76  137.47
   4 -10   8  397.77   90.76
  -4  10  -8  378.61   79.50
  -4 -10  -9 6748.76  383.86
   4 -10   9 6417.79  340.93
  -4  10  -9 6410.00  397.04
  -4 -10 -10  821.97  191.70
  -4  10 -10  627.10  134.84
  -4 -10 -11  444.17  134.68
   4 -10  11  457.12   95.61
  -4  10 -11  227.83  165.95
  -4  10 -11  525.83  146.71
  -4 -10 -12  155.51   60.34
   4 -10  12   88.19   56.99
  -4  10 -12   95.30   39.47
  -4  10 -12  210.87   91.85
  -4 -10 -13  116.09   69.02
   4 -10  13   61.67   36.30
  -4  10 -13   81.09   41.49
  -4 -10 -13   18.43   19.17
  -4  10 -13   49.24   39.90
  -4 -10 -14  384.50  125.58
   4 -10  14  241.21  174.56
  -4  10 -14  308.75   66.93
  -4 -10 -14  274.76  140.69
  -4  10 -14  307.33  121.53
  -4 -10 -15  142.82   44.96
   4 -10  15  242.75   85.43
  -4  10 -15  322.26   77.58
  -4 -10 -15  249.94   79.32
  -4  10 -15  105.40   41.33
  -4 -10 -16   44.91   59.05
   4 -10  16    5.05   22.54
  -4  10 -16   62.95   53.61
  -4 -10 -16    9.42   27.41
  -4  10 -16   22.53   16.88
  -4 -10 -17   -2.58   26.12
   4 -10  17   36.31   25.83
  -4 -10 -17   50.36   35.95
  -4  10 -17   43.96   33.40
  -4 -10 -18   25.16   29.82
  -4  10 -18   71.88   48.80
  -4  10 -18   34.79   44.26
  -4 -10 -19   77.89   59.06
  -4  10 -19   87.97   26.87
  -4  10 -19   20.27   22.71
   4 -12 -22  105.41   49.63
  -4 -12  22    5.46   30.46
   4 -12 -21   34.28   70.32
  -4 -12  21   59.69   25.80
   4 -12 -20   61.25   54.05
  -4 -12  20   36.38   55.47
   4 -12 -19  312.44   71.02
  -4 -12  19  508.72  177.11
   4 -12 -18  100.56   55.02
  -4 -12  18  282.34   93.18
   4 -12 -17  540.09  135.78
  -4 -12  17  377.10  106.92
   4 -12 -16 1233.70  308.78
  -4 -12  16 1128.35  379.82
   4 -12 -15 6491.64  633.64
  -4 -12  15 7044.83  360.47
   4 -12 -14 1731.05  336.07
  -4 -12  14 1753.30  404.69
   4 -12 -13  278.15  114.76
  -4 -12  13  197.18   73.22
   4 -12 -12   58.48   50.06
  -4 -12  12   97.76   56.71
   4 -12 -11 1551.08  319.30
  -4 -12  11 1866.59  345.42
   4 -12 -10   51.93   57.63
  -4 -12  10   71.05   28.62
   4 -12  -9 8614.73  672.22
  -4 -12   9 8830.52  490.54
   4 -12  -8  611.38  177.92
  -4 -12   8  246.82  112.15
   4 -12  -7 2188.45  451.38
  -4 -12   7 2010.50  142.91
   4 -12  -6  177.76   84.29
  -4 -12   6  234.27  100.05
  -4 -12   5 5036.52  730.25
  -4 -12   4 3510.07  396.85
   4 -12  -4 2651.51   99.75
  -4 -12   3 4336.17  300.00
   4 -12  -3 3761.46  257.83
  -4  12   3 3943.23  242.63
  -4 -12   2  158.61  102.19
   4 -12  -2  327.02  114.83
  -4  12   2  243.69   53.88
   4 -12  -1 3885.18  279.25
  -4 -12   1 3718.24  287.86
   4 -12  -1 3552.54  217.00
  -4  12   1 3339.21  330.45
   4 -12   0  116.43   59.23
  -4 -12   0   23.90   35.69
   4 -12   0   21.87   15.19
  -4  12   0   20.54   27.89
   4 -12   113549.30  496.80
  -4 -12  -113124.90  497.88
  -4  12  -112813.30  425.49
  -4 -12  -2 8601.46  366.97
   4 -12   2 7914.18  336.28
  -4 -12  -2 7387.61  250.60
   4  12   2 7775.82  269.75
  -4 -12  -312135.40  595.83
   4 -12   311129.50  548.61
  -4 -12  -311097.60  487.83
  -4  12  -311250.30  502.81
   4  12   311445.30  498.67
  -4 -12  -4 2830.65  190.73
   4 -12   4 2519.66  175.42
  -4 -12  -4 2661.92  296.93
  -4  12  -4 2808.88  334.32
   4  12   4 2350.35  172.54
  -4 -12  -5  440.01   90.64
   4 -12   5  291.18   80.78
  -4 -12  -5  313.42  129.77
  -4  12  -5  331.31   69.14
   4  12   5  204.08   49.84
  -4 -12  -6  166.44   81.63
  -4  12  -6  131.69   41.84
  -4 -12  -6   31.35   30.33
  -4 -12  -7 1860.35  354.13
  -4  12  -7 1806.42  183.33
  -4 -12  -7 1675.04  120.65
  -4 -12  -8   13.21   42.90
  -4  12  -8   17.00   23.73
  -4 -12  -9   38.33   41.30
   4 -12   9   63.62   48.23
  -4  12  -9   66.55   31.76
  -4 -12 -10  446.63   69.00
   4 -12  10  452.08  111.39
  -4  12 -10  485.03   75.02
  -4 -12 -11   42.60   54.23
   4 -12  11   33.49   20.43
  -4  12 -11   96.92   50.13
  -4 -12 -12 3286.08  503.98
   4 -12  12 3495.73  319.03
  -4  12 -12 3571.40  185.75
  -4  12 -12 3039.13  675.16
  -4 -12 -13 8439.75  501.46
   4 -12  13 7835.03  291.26
  -4  12 -13 7312.37  404.00
  -4  12 -13 7892.61  327.23
  -4 -12 -14   36.34   47.16
   4 -12  14   37.85   21.31
  -4  12 -14   63.19   62.45
  -4  12 -14   41.10   16.95
  -4 -12 -15   85.10   65.39
   4 -12  15    8.98   18.40
  -4  12 -15   78.65   49.39
  -4 -12 -15   42.90   25.92
  -4  12 -15   72.11   27.06
   4 -12  16   43.24   17.34
  -4  12 -16   27.58   33.27
  -4 -12 -16  104.75   50.45
  -4  12 -16  108.81   57.01
  -4 -12 -17   29.50   38.67
  -4  12 -17   65.59   28.98
  -4 -12 -17   15.81   20.08
  -4  12 -17   11.88   23.89
  -4 -12 -18   36.36   22.47
  -4  12 -18   15.65   16.25
  -4  12 -18    3.82   19.19
   4 -14 -21   55.76   57.00
  -4 -14  21   23.04   38.07
   4 -14 -20  134.74   80.50
  -4 -14  20   77.10   51.05
   4 -14 -19   41.57   45.56
  -4 -14  19  138.16   86.58
   4 -14 -18  427.90  129.20
  -4 -14  18  838.71  201.00
   4 -14 -17   24.38   38.54
  -4 -14  17   42.73   38.21
   4 -14 -16 2617.34  747.38
  -4 -14  16 2731.16  766.04
   4 -14 -15  127.38   65.09
  -4 -14  15  131.05   40.77
   4 -14 -14 1810.75  461.23
  -4 -14  14 1786.52  362.96
   4 -14 -13 1004.09  210.81
  -4 -14  13  827.21  299.31
   4 -14 -12 3184.47  446.32
  -4 -14  12 2794.26  523.72
   4 -14 -11   97.85   76.56
  -4 -14  11  149.24   65.75
   4 -14 -10   61.03   31.10
  -4 -14  10  123.80   67.51
   4 -14  -9  101.10   83.23
  -4 -14   9  152.06   44.16
   4 -14  -8   22.51   53.23
  -4 -14   8   85.33   63.11
  -4 -14   8    3.18    6.90
   4 -14  -7  105.10   33.36
  -4 -14   7   27.52   27.59
  -4 -14   7    6.06    6.44
   4 -14  -6 3541.49  262.26
  -4 -14   6 3169.30  202.55
   4 -14  -5  658.28  152.32
  -4 -14   5  582.98  153.98
   4 -14  -5  264.71   93.28
   4 -14  -4 1256.63  368.73
  -4 -14   4 1494.16  342.49
  -4  14   4 1031.73  146.15
   4 -14  -3  273.33  132.58
  -4 -14   3  115.71   62.52
   4 -14  -3  100.54   54.13
  -4  14   3  188.11   36.51
  -4 -14   219179.10  908.84
   4 -14  -220572.00  891.05
   4 -14  -219075.90  759.27
  -4  14   218282.20  742.52
  -4 -14   1  723.43  205.56
   4 -14  -1  626.82   90.59
   4 -14  -1  405.05  114.53
  -4  14   1  394.65  113.30
   4 -14   010829.20  520.20
  -4 -14   010977.40  554.97
  -4  14   010645.40  503.58
   4 -14   1 1334.80  349.85
  -4 -14  -1 1360.80  462.94
   4 -14   2  263.98   76.24
  -4 -14  -2  151.17   73.21
  -4 -14  -3  346.74   78.14
   4 -14   3  284.37  149.56
  -4 -14  -3  171.87   55.57
   4  14   3   92.97   30.60
  -4 -14  -4 2287.66  554.14
   4 -14   4 2186.95  536.10
  -4 -14  -4 1877.88  104.77
  -4  14  -4 1935.93  224.96
  -4 -14  -5  272.46  116.00
   4 -14   5   52.57   51.67
  -4 -14  -5  112.80   29.21
  -4  14  -5  198.45   45.94
  -4 -14  -6 3308.40  271.87
   4 -14   6 3943.03  221.87
  -4 -14  -6 3261.88  226.28
  -4  14  -6 3697.12  356.53
  -4 -14  -7 1465.03  349.88
   4 -14   7 1273.92  395.02
  -4 -14  -7 1123.27  248.19
  -4  14  -7 1421.12  292.57
  -4 -14  -8   -6.78   22.62
   4 -14   8   58.56   37.69
  -4  14  -8   29.59   33.90
  -4 -14  -8   29.02   25.96
  -4 -14  -9   20.57   33.50
   4 -14   9   25.75   29.49
  -4  14  -9   10.79   33.21
  -4 -14  -9    7.65   15.38
  -4 -14 -10 1693.80  372.03
   4 -14  10 1921.38  159.26
  -4  14 -10 1524.84  270.43
  -4 -14 -10 1157.31  344.05
  -4 -14 -11   93.46   43.50
   4 -14  11   48.07   33.43
  -4  14 -11   33.22   32.43
  -4 -14 -12 1165.21  226.10
   4 -14  12  988.29  248.12
  -4  14 -12 1030.25  217.44
  -4 -14 -13   31.49   39.96
   4 -14  13    1.38   23.62
  -4  14 -13   14.82   26.28
  -4 -14 -14  629.29  178.46
   4 -14  14  695.97  205.57
  -4  14 -14  642.28  123.60
  -4  14 -14  235.52  276.75
  -4 -14 -15   27.72   35.99
   4 -14  15   50.94   25.21
  -4  14 -15   49.95   31.50
  -4  14 -15   80.85   65.39
  -4 -14 -16 1822.79  237.76
   4 -14  16  891.90  347.34
  -4  14 -16 1508.74  246.40
  -4 -14 -16 1038.93  357.94
  -4  14 -16 1292.85  439.20
  -4 -14 -17   48.33   46.82
  -4  14 -17  104.37   50.25
  -4  14 -17   43.93   34.49
   4 -16 -19  183.84  123.64
  -4 -16  19   30.39   43.00
   4 -16 -18  275.75  130.46
  -4 -16  18  446.24  128.16
   4 -16 -17  174.42   80.03
  -4 -16  17   69.49   60.01
   4 -16 -16 1239.07  335.47
  -4 -16  16 1269.55  271.13
   4 -16 -15  607.30  169.80
  -4 -16  15  480.10  156.81
   4 -16 -14   14.78   57.16
  -4 -16  14   25.65   44.35
   4 -16 -13  255.88  128.69
  -4 -16  13  277.19  170.43
   4 -16 -12  742.98  207.20
  -4 -16  12  638.66  166.05
   4 -16 -11  125.79   52.96
  -4 -16  11  134.19   67.11
   4 -16 -10 1288.31  278.35
  -4 -16  10 1682.33  397.23
   4 -16  -9  139.19   57.38
  -4 -16   9   55.83   36.00
   4 -16  -8   25.53   14.50
  -4 -16   8   50.36   55.62
   4 -16  -7  138.45   75.26
  -4 -16   7   75.83   27.94
   4 -16  -6 1344.77  302.86
  -4 -16   6 1102.41  400.19
   4 -16  -5  521.01  121.53
  -4 -16   5  607.48  175.37
  -4  16   5  306.06   83.63
   4 -16  -4 1371.87  324.99
  -4 -16   4 1644.65  395.27
  -4  16   4 1238.51  125.89
   4 -16  -3  128.45   51.16
  -4 -16   3  381.27   74.73
  -4  16   3  119.43   48.13
  -4 -16   2  877.82  167.58
   4 -16  -2  838.59  219.07
  -4  16   2  651.77   90.43
   4 -16  -1 1419.14  375.95
  -4  16   1 1127.48  171.60
   4 -16   0 1669.41  571.90
  -4 -16   0 1731.16  421.19
  -4 -16  -1 1172.58  280.95
   4 -16   1 1161.74  291.99
   4 -16   2  737.89  278.96
  -4 -16  -2  774.79  166.35
  -4 -16  -3   72.52   76.89
   4 -16   3   58.14   57.01
  -4 -16  -4  251.83   98.14
   4 -16   4  368.80   86.75
  -4 -16  -5   95.80   86.30
   4 -16   5   76.52   48.29
  -4  16  -5   62.63   30.71
  -4 -16  -6  544.04  137.34
   4 -16   6  438.67  158.86
  -4  16  -6  359.82   83.02
  -4 -16  -7  328.22   60.08
   4 -16   7  413.89   98.46
  -4  16  -7  351.28   78.10
  -4 -16  -8 1767.93  240.02
   4 -16   8 1280.73  409.29
  -4  16  -8 1244.07  229.53
  -4 -16  -9  754.63  143.35
   4 -16   9  464.09  130.46
  -4  16  -9  475.17  144.28
  -4 -16 -10 1909.22  319.10
   4 -16  10 1394.43  519.30
  -4  16 -10 1343.62  321.53
  -4 -16 -11  237.55   72.48
   4 -16  11  271.81   80.94
  -4  16 -11  326.11   68.55
  -4 -16 -12   72.27   40.98
   4 -16  12   15.99   28.02
  -4  16 -12    8.26   30.11
  -4 -16 -13  800.91  201.46
   4 -16  13  385.86  236.81
  -4  16 -13  530.59  103.35
  -4 -16 -14  259.90   45.50
   4 -16  14  108.82   77.18
  -4  16 -14  164.06   50.52
  -4  16 -14  153.36   37.24
  -4 -16 -15   53.78   39.27
   4 -16  15   36.22   18.44
  -4  16 -15   10.37   33.75
  -4  16 -15   13.80   16.88
   4 -18 -17  110.75   77.57
  -4 -18  17   54.86   58.23
   4 -18 -16   57.07   56.54
  -4 -18  16    1.81   27.70
   4 -18 -15   49.60   54.38
  -4 -18  15   45.19   67.55
   4 -18 -14   69.01   64.29
  -4 -18  14  131.78   76.24
   4 -18 -13  145.78  105.17
  -4 -18  13   67.27   61.24
   4 -18 -12   19.29   38.45
  -4 -18  12   55.60   64.19
   4 -18 -11 1050.29  282.95
  -4 -18  11  901.79  212.94
   4 -18 -10  -34.56   45.98
  -4 -18  10   71.42   45.38
   4 -18  -9 1416.63  386.94
  -4 -18   9 1731.61  525.70
   4 -18  -8   90.96   26.99
  -4 -18   8   28.03   76.76
   4 -18  -7   52.15   28.22
  -4 -18   7  127.26   55.58
   4 -18  -6   39.84   32.00
  -4 -18   6   51.58   49.84
   4 -18  -5  123.80   50.91
  -4 -18   5  318.98   86.25
   4 -18  -4  820.61  175.77
  -4 -18   4  389.14  429.96
   4 -18  -3  231.93  101.91
  -4 -18   3  352.43  155.09
   4 -18  -2  641.69  185.98
  -4 -18   2  412.13  162.75
  -4 -18   1  151.87   73.47
   4 -18  -1  188.18   87.73
   4 -18   0   98.80   44.88
  -4 -18   0  138.18   81.86
   4 -18   1  131.28  127.59
  -4 -18  -1  111.08  109.10
  -4 -18  -2   48.61   59.44
   4 -18   2   67.05   39.98
  -4 -18  -3  365.21  108.26
   4 -18   3  217.55   86.57
  -4 -18  -4  180.89   95.24
   4 -18   4  232.66   62.63
  -4 -18  -5  274.45   66.65
   4 -18   5  232.62   56.74
  -4 -18  -6   23.73   49.62
   4 -18   6   50.17   35.58
  -4 -18  -7 1233.27  198.31
   4 -18   7  967.27  375.49
  -4 -18  -8   79.38   22.32
   4 -18   8   81.31   43.81
  -4 -18  -9  988.78  293.91
   4 -18   9  676.54  229.02
  -4 -18 -10   12.39   26.07
   4 -18  10   66.24   24.30
  -4 -18 -11  107.67   66.36
   4 -18  11  114.60   41.78
  -4 -18 -12    5.84   53.85
   4 -18  12   39.33   19.51
  -4 -18 -13   29.87   37.41
   4 -18  13    5.63   19.93
   4 -20 -15   23.00   39.64
  -4 -20  15   24.12   39.95
   4 -20 -14   95.08   72.51
  -4 -20  14   56.32   50.65
   4 -20 -13  103.18   61.35
  -4 -20  13   36.68   37.85
   4 -20 -12   35.40   35.60
  -4 -20  12   44.85   83.69
   4 -20 -11   91.20   61.15
  -4 -20  11  142.25  107.54
   4 -20 -10    5.26   50.09
  -4 -20  10   63.43   41.74
   4 -20  -9   90.60   64.70
  -4 -20   9   62.73   48.37
   4 -20  -8   39.07   50.49
  -4 -20   8   83.42   81.02
   4 -20  -7   32.42   41.96
  -4 -20   7   53.63   58.00
   4 -20  -6   77.39   41.37
  -4 -20   6   13.98   46.21
   4 -20  -5   72.88   69.02
  -4 -20   5  251.01   70.34
   4 -20  -4   79.96   46.17
  -4 -20   4   76.33   30.80
   4 -20  -3  345.31  113.28
  -4 -20   3  126.63  173.09
   4 -20  -2  364.62   98.89
  -4 -20   2  374.49   80.50
   4 -20  -1    3.23   42.68
  -4 -20   1   34.41   46.31
   4 -20   0    9.51   48.53
  -4 -20   0   84.54   67.41
   4 -20   1    2.72   47.24
  -4 -20  -1   79.75   57.80
  -4 -20  -2  558.81  162.64
   4 -20   2  561.46  167.89
  -4 -20  -3   41.03   19.97
   4 -20   3   59.99   36.06
  -4 -20  -4   48.97   33.27
   4 -20   4    1.78   24.88
  -4 -20  -5  142.15   45.79
   4 -20   5  217.25   40.31
   4 -20   6   81.16   67.09
  -4 -20  -7   13.38   34.06
   4 -20   7   42.45   25.49
  -4 -20  -8   47.77   70.63
   4 -20   8   51.51   39.54
  -4 -20  -9    9.45   68.92
   4 -20   9   20.16   30.61
  -4 -20 -10   82.08   58.89
   4 -20  10  129.66   55.42
  -4 -20 -11   94.09   37.66
   4 -20  11   25.51   21.65
   4 -22 -12   92.93   36.38
  -4 -22  12   80.34   35.93
   4 -22 -11  101.08   61.30
  -4 -22  11   48.54   65.89
   4 -22 -10   21.87   36.83
  -4 -22  10   97.41   33.16
   4 -22  -9   95.49   50.54
  -4 -22   9   12.27   52.15
   4 -22  -8   50.64   57.78
  -4 -22   8   22.16   21.57
   4 -22  -7   69.45   80.21
  -4 -22   7   39.89   40.76
   4 -22  -6   61.34   47.92
  -4 -22   6   29.23   45.08
   4 -22  -5  333.01  119.73
  -4 -22   5  130.02  115.08
   4 -22  -4   19.70   45.95
  -4 -22   4   30.55   53.71
   4 -22  -3  200.70   37.73
  -4 -22   3  407.41   82.62
   4 -22  -2  435.13  111.12
  -4 -22   2  464.53  148.74
   4 -22  -1   19.80   38.52
  -4 -22   1   88.10   56.19
  -4 -22   0  542.15  124.14
   4 -22   0  557.97  214.09
  -4 -22  -1   74.24   57.20
   4 -22   1  102.37  186.57
  -4 -22  -2   56.72   69.78
   4 -22   2   29.57   50.76
  -4 -22  -3   89.96   87.15
   4 -22   3   14.74   31.52
  -4 -22  -4   82.78   79.99
   4 -22   4   50.49   51.16
  -4 -22  -5   45.30   48.07
   4 -22   5   21.60   34.61
  -4 -22  -6   23.98   52.61
   4 -22   7   14.67   34.07
  -4 -22  -8   16.43   38.60
   4 -22   8   46.74   31.92
   4 -24  -6   64.71   36.35
  -4 -24   6   89.55   41.64
   4 -24  -5   69.15   85.50
  -4 -24   5  108.50   57.31
   4 -24  -4   40.37   27.56
  -4 -24   4   34.06   35.54
   4 -24  -3  280.39  202.70
  -4 -24   3  337.18   75.53
  -4 -24   2  101.53   42.45
   4 -24  -1  253.56  140.84
  -4 -24   1  309.61  124.44
   4 -24   0  471.09   97.52
  -4 -24   0  485.26  237.59
  -4 -24  -1   66.80   65.70
   4 -24   1   51.40   57.44
  -4 -24  -2  136.90  104.48
   4 -24   2  102.30   31.24
   5   1 -25   69.73   27.55
   5  -1 -25   30.18   22.61
   5  -1 -24   61.41   59.10
   5   1 -24   54.14   36.13
   5  -1 -23  256.46   61.28
   5   1 -23  413.98  105.16
   5   1 -22  240.55   55.71
   5  -1 -22  157.02  117.96
   5  -1 -21  112.32   51.52
   5   1 -21   26.37   31.16
   5   1 -20  158.76   72.13
   5  -1 -20  122.74   90.45
   5   1 -19  327.74  114.96
   5  -1 -19  176.97   87.82
   5  -1 -18  107.79   88.77
   5   1 -18   36.42   60.25
   5  -1 -17 1511.18  279.13
  -5  -1  17 1934.54  470.01
   5  -1 -16  594.64  289.94
  -5  -1  16  900.79  186.09
   5  -1 -1512248.70  710.83
  -5  -1  1512705.00  624.64
   5  -1 -14 3887.63  504.93
  -5  -1  14 3536.45  271.07
   5  -1 -13  110.19   36.77
  -5  -1  13  168.81  110.19
   5  -1 -12 1194.17  207.52
  -5  -1  12 1572.86  350.96
  -5  -1  12 1052.10   24.80
   5  -1 -11 6297.19  546.50
  -5  -1  11 5805.20  301.86
  -5  -1  10  104.52   48.59
  -5   1  10  -39.81   66.34
  -5  -1   9 8762.94  317.61
  -5   1   9 8742.57  317.11
   5   1  -8 2030.50  153.35
  -5  -1   8 2223.66  145.57
   5  -1  -8 1973.51  425.94
  -5   1   8 2416.48  167.31
   5   1  -7 9301.94  270.05
   5  -1  -7 8844.38  315.60
  -5  -1   7 9975.33  289.34
  -5   1   7 9491.35  326.13
   5   1  -620373.00  344.02
  -5  -1   620893.60  360.74
   5  -1  -620727.50  344.87
  -5   1   620183.90  331.75
   5  -1  -620562.20  252.32
  -5   1   620606.50  261.87
  -5   1   620996.10  277.08
   5   1  -523543.30  369.21
   5  -1  -523977.70  347.45
  -5  -1   524110.30  359.91
  -5   1   523548.00  353.40
   5  -1  -524515.70  316.63
  -5   1   524200.90  313.58
   5   1  -523932.20  311.74
   5   1  -436513.30  461.35
  -5  -1   436167.40  478.42
   5  -1  -435740.90  458.99
  -5   1   436452.40  458.95
   5  -1  -436211.20  433.98
   5  -1  -436660.80  439.91
   5   1  -436119.30  460.08
  -5   1   436560.70  437.95
   5   1  -312134.90  250.86
  -5  -1   311819.80  205.23
   5  -1  -311729.40  200.86
   5  -1  -311843.10  203.21
  -5   1   312389.30  230.69
   5  -1  -312078.40  204.87
   5   1  -311721.20  204.25
  -5   1   311788.00  206.92
   5  -1  -2 6030.14  157.16
   5   1  -2 6022.59  158.28
  -5  -1   2 6068.30  166.52
   5  -1  -2 6030.63  163.73
   5   1  -2 5984.35  225.35
   5  -1  -2 6112.78  185.97
   5  -1  -2 6061.62  175.88
  -5  -1   2 5768.97  207.09
  -5   1   2 5704.22  212.06
   5  -1  -2 6080.48  177.87
  -5   1   2 6019.54  182.17
   5   1  -2 5601.30  169.72
   5  -1  -116152.20  205.77
   5   1  -116041.00  219.76
  -5  -1   116437.40  216.09
   5  -1  -115794.60  196.22
  -5   1   116458.10  296.73
  -5  -1   115922.10  267.61
   5  -1  -115492.40  262.57
   5   1  -115794.70  262.84
  -5  -1   116549.10  280.49
   5  -1  -116659.70  321.37
  -5   1   115322.20  261.12
  -5  -1   116471.70  275.11
  -5   1   115823.20  275.78
  -5   1   115250.20  262.17
  -5  -1   116425.00  309.34
   5   1   0  911.07   62.45
   5   1   0  871.20  227.20
   5  -1   0 1077.13  195.28
  -5  -1   0  973.05   81.53
  -5   1   0 1030.73   94.92
   5  -1   0  963.66   69.75
  -5  -1   0 1138.24  123.57
  -5   1   0 1003.87  284.44
   5   1   0  929.73   66.76
   5  -1   0 1052.62   76.03
  -5  -1   0 1002.41   81.63
  -5   1   0 1349.72  240.98
  -5   1   0 1114.64   75.74
   5  -1   0  910.60  230.64
   5   1   0  963.70  128.56
  -5  -1   0 1052.02  241.93
   5   1   112359.10  168.15
   5  -1   112672.00  245.44
  -5   1  -112052.40  247.85
  -5  -1  -113188.10  254.60
   5   1   113070.50  257.19
   5  -1   112661.00  251.93
  -5  -1  -112725.20  257.56
  -5   1  -111975.00  248.41
   5   1   111826.90  232.24
   5  -1   112381.70  242.34
  -5  -1  -112296.80  289.33
  -5   1  -112691.40  274.14
   5  -1   111905.00  239.63
  -5   1  -112798.40  295.07
  -5  -1  -112606.30  254.11
   5   1   112170.60  240.79
   5   1   2 1978.13   76.15
  -5  -1  -2 2074.57   79.57
  -5   1  -2 2073.01   34.66
  -5  -1  -2 1840.26  116.51
  -5   1  -2 2008.26  228.87
   5  -1   2 2021.59  144.28
   5   1   2 1882.55  102.88
   5  -1   2 2109.56  117.14
  -5  -1  -2 2040.65  113.19
  -5   1  -2 2180.66  107.48
   5   1   2 1923.82  100.15
   5  -1   2 1978.29  118.20
  -5  -1  -2 2095.17   99.85
  -5   1  -2 1962.94  113.73
   5  -1   2 1985.15  127.92
  -5   1  -2 2321.97  181.36
   5   1   2 2062.70   96.13
  -5  -1  -2 2341.69  128.21
   5   1   3 6239.01  269.69
  -5  -1  -3 6563.80  304.13
  -5   1  -3 6358.42  262.74
  -5   1  -3 6263.32  310.05
  -5  -1  -3 6159.66  309.09
  -5  -1  -3 6847.77  433.43
   5  -1   3 5731.70  281.53
  -5   1  -3 7267.70  347.76
   5   1   3 6040.40  292.39
   5  -1   3 5995.13  288.40
  -5  -1  -3 6051.30  344.74
  -5   1  -3 6270.14  306.17
   5  -1   3 6612.28  312.75
   5   1   3 5976.55  285.93
  -5   1  -3 5930.50  303.94
  -5  -1  -3 6233.09  311.99
  -5   1  -4 3000.11  155.02
  -5  -1  -4 2708.94  135.96
  -5   1  -4 2662.35  125.37
  -5  -1  -4 2579.32  126.36
  -5   1  -4 2710.25  172.36
  -5  -1  -4 2716.24  207.63
  -5  -1  -4 2577.11  172.90
   5  -1   4 2508.36  176.12
  -5   1  -4 3020.36  182.49
   5  -1   4 2838.64  255.25
   5   1   4 2526.75  243.25
  -5   1  -4 2666.13  261.60
  -5  -1  -4 2480.79  160.00
  -5   1  -5  908.90  180.11
  -5  -1  -5  810.50  135.42
  -5   1  -5  756.68  123.82
  -5  -1  -5  784.97   75.96
  -5  -1  -5  997.67  216.05
  -5   1  -5  752.21  217.12
  -5  -1  -5  760.33  167.20
  -5   1  -5  952.90  205.68
  -5  -1  -5  942.28   96.95
  -5   1  -5  668.32  213.30
  -5   1  -6  343.71   74.03
  -5  -1  -6  316.63   55.91
  -5   1  -6  265.42   48.88
  -5  -1  -6  192.17   53.48
  -5   1  -6  287.53  119.87
  -5  -1  -6  139.53   94.13
  -5  -1  -6  294.81   86.46
  -5   1  -6  176.08   65.03
  -5   1  -6  102.27   92.68
  -5  -1  -6  277.94  111.68
  -5   1  -7  831.57  136.49
  -5  -1  -7 1086.43  138.95
  -5   1  -7  947.32  206.64
  -5  -1  -7 1003.49  150.38
  -5   1  -7 1129.97  323.77
  -5  -1  -7 1339.79  305.60
  -5   1  -7 1333.49  269.15
  -5   1  -7 1142.80  290.77
  -5  -1  -7 1159.62  250.73
  -5   1  -8  210.37   43.53
  -5  -1  -8  245.89   63.42
  -5   1  -8  181.97   52.00
  -5  -1  -8  173.80   45.71
  -5  -1  -8  237.46   61.18
  -5   1  -8  212.72   69.77
  -5  -1  -8  230.01   49.33
  -5   1  -8  239.09   63.94
  -5   1  -9 1104.48  197.86
  -5  -1  -9 1154.38  228.87
  -5   1  -9  791.30  195.63
  -5  -1  -9  790.38  192.69
  -5  -1  -9 1171.35  339.77
  -5   1  -9 1288.29  269.15
  -5   1  -9 1077.89  323.15
  -5  -1  -9 1191.42  282.03
  -5   1 -10   19.07   20.29
  -5  -1 -10   35.38   39.93
  -5   1 -10  108.32   51.05
  -5  -1 -10   59.95   62.08
  -5  -1 -10   73.84   50.61
  -5   1 -10   90.02   36.77
  -5   1 -11  733.05  173.40
  -5  -1 -11  554.50  122.88
  -5  -1 -11  691.98  192.08
  -5   1 -11  606.13  135.04
  -5   1 -11  530.84  147.41
  -5   1 -12 2629.79  270.87
  -5  -1 -12 2259.08  393.24
  -5  -1 -12 2864.36  193.30
  -5   1 -12 2930.68  176.16
  -5   1 -13 1158.67  272.17
  -5  -1 -13 1150.43  236.65
  -5   1 -13 1346.56  320.55
  -5  -1 -13 1447.20  282.71
  -5   1 -13 1130.34  310.34
  -5   1 -14  186.53   77.24
  -5  -1 -14   74.39   57.84
  -5  -1 -14  242.03   93.82
  -5   1 -14  209.71   62.37
  -5   1 -15  376.08   73.21
  -5  -1 -15  415.74  119.61
  -5  -1 -15  506.01  125.57
  -5   1 -15  384.46  113.11
  -5   1 -16   47.32   38.25
  -5  -1 -16   18.24   12.53
  -5  -1 -16   64.42   20.17
  -5   1 -17   37.87   29.90
  -5  -1 -17   37.07   60.98
  -5  -1 -17   26.68   25.96
  -5   1 -18   18.03   20.95
  -5  -1 -18   50.55   42.81
  -5   1 -19   61.13   18.79
  -5  -1 -19   21.69   31.47
   5   3 -25  239.32  115.02
   5  -3 -25  194.13   94.57
   5   3 -24  175.29  104.88
   5  -3 -24  100.93   39.97
   5   3 -23   21.93   43.37
   5  -3 -23   29.15   54.20
   5  -3 -22  147.13   48.28
   5   3 -22  164.14   89.54
   5  -3 -21   72.82   52.81
   5  -3 -20   97.62   87.28
  -5  -3  20   23.78   30.02
   5  -3 -19   87.25   52.61
  -5  -3  19  111.06   69.49
   5  -3 -18  354.05   90.37
  -5  -3  18  433.48   85.62
   5  -3 -17  127.84   45.31
  -5  -3  17   65.26   54.94
   5   3 -17    3.93    8.08
   5  -3 -16 3287.14  688.20
  -5  -3  16 3337.14  215.23
  -5  -3  16 2725.76  128.92
   5   3 -16 2674.47  209.41
   5  -3 -15  270.90  155.93
  -5  -3  15  485.69  123.75
   5   3 -15  296.34   59.70
   5  -3 -14 7770.59  347.85
  -5  -3  14 7631.10  346.50
  -5  -3  14 7170.57  245.56
   5   3 -14 7011.25  239.97
  -5  -3  13  762.33   75.78
   5  -3 -12  235.28   67.56
  -5  -3  12  206.12   60.05
   5  -3 -1115105.90  704.89
  -5  -3  1115491.40  534.85
   5  -3 -10  -35.33   63.06
  -5  -3  10   65.06   52.68
  -5   3  10    5.61    4.91
   5  -3  -9 6926.48  366.07
  -5  -3   9 6832.99  340.60
   5  -3  -9 6715.81  293.85
   5  -3  -8 9829.84  340.27
  -5  -3   810255.00  351.46
   5  -3  -810185.70  314.99
   5  -3  -7  679.37  201.04
  -5  -3   7  864.12  223.70
   5   3  -7  579.99  158.48
   5  -3  -7  724.46  143.69
   5  -3  -7  522.73  109.65
   5  -3  -610618.50  301.26
  -5  -3   6 9805.71  280.17
   5   3  -6 9722.02  273.32
   5  -3  -610103.60  260.85
  -5   3   5 2123.03  139.07
   5  -3  -5 2094.90   96.75
   5   3  -5 1999.95  106.61
  -5  -3   5 2151.52  104.48
   5  -3  -5 1877.60  132.10
   5  -3  -4 1064.69   84.83
  -5   3   4 1052.64   68.78
   5   3  -4 1023.44   65.10
  -5  -3   4 1298.99  171.14
   5  -3  -4  998.52   60.40
  -5   3   318539.50  291.18
   5  -3  -319649.60  324.38
   5   3  -318340.00  289.69
  -5  -3   318988.90  296.81
   5  -3  -318837.00  313.68
  -5   3   223609.00  308.60
   5  -3  -224372.10  322.25
   5   3  -223366.50  341.24
  -5  -3   224406.80  344.27
   5   3  -223729.00  330.17
   5  -3  -224282.80  358.73
  -5  -3   224593.70  361.19
  -5   3   224499.30  368.89
  -5   3   1 3011.30  107.41
   5  -3  -1 3107.41   96.47
   5   3  -1 3127.49  108.58
  -5  -3   1 3178.17  110.91
   5   3  -1 3077.37  122.23
  -5  -3   1 3149.99  176.89
   5  -3  -1 3072.58  119.76
  -5   3   1 3105.36  132.81
   5  -3  -1 3095.48  246.85
  -5   3   1 3422.98  140.10
  -5  -3   1 3201.47  120.78
  -5   3   1 2973.37  140.09
  -5   3   0 6477.19  177.43
   5   3   0 6580.43  176.54
  -5  -3   0 6509.08  241.50
   5  -3   0 6666.42  180.18
   5   3   0 6213.43  241.94
   5  -3   0 6712.34  215.47
  -5  -3   0 6675.00  236.08
  -5   3   0 6846.69  216.74
   5  -3   0 6696.04  212.15
  -5   3   0 6692.44  226.54
  -5   3   0 6455.58  274.36
   5  -3   0 6581.64  201.83
   5   3   0 6573.74  193.86
  -5  -3   0 6485.09  208.31
  -5   3   0 6611.79  324.07
   5   3   1 1612.13   78.65
  -5   3  -1 1577.27   75.18
  -5  -3  -1 1715.00   80.46
   5  -3   1 1627.37   62.26
  -5  -3  -1 1441.71  122.57
   5   3   1 1684.69  240.72
   5  -3   1 1607.21   83.40
  -5   3  -1 1603.09  129.97
   5  -3   1 1734.24  113.29
  -5   3  -1 1529.45  109.71
   5   3   1 1635.21   92.19
   5  -3   1 1623.28  128.60
  -5   3  -1 1700.35  100.32
  -5  -3  -1 1482.87   91.00
  -5   3  -1 1691.85  235.15
   5   3   1 1656.07  197.67
   5   3   2 1719.46   73.64
  -5  -3  -2 1641.35  144.50
  -5   3  -2 1728.82   67.66
   5  -3   2 1819.47   58.83
  -5  -3  -2 1831.95  202.44
  -5   3  -2 1998.75  214.69
   5  -3   2 1716.17   97.24
  -5   3  -2 1638.37  107.77
   5  -3   2 1665.98  179.50
   5  -3   2 1621.45   87.70
   5   3   2 1673.37  172.62
  -5  -3  -2 1913.04  347.48
  -5   3  -2 1762.43  384.88
  -5   3  -2 1776.46  109.16
   5   3   2 1575.23   94.60
   5   3   3 8912.01  288.93
  -5  -3  -3 8973.82  279.52
  -5   3  -3 9226.18  270.60
   5  -3   3 9179.87  262.76
  -5   3  -3 8889.17  355.20
  -5  -3  -3 9128.53  309.39
   5  -3   3 8164.51  302.84
  -5   3  -3 9082.69  314.16
  -5   3  -3 8432.61  298.88
   5   3   3 8500.80  298.21
  -5   3  -3 8848.40  322.79
   5   3   3 8048.45  293.98
   5   3   4 1693.50   74.93
  -5  -3  -4 2386.12  192.01
  -5   3  -4 1783.29   67.69
   5  -3   4 1837.30   90.64
  -5  -3  -4 1975.75  243.93
  -5   3  -4 2056.87  125.38
  -5  -3  -4 1562.11  140.62
  -5   3  -4 2132.75  166.97
   5   3   4 1791.76  102.65
  -5   3  -4 1997.47  369.16
   5   3   5  372.88   47.27
  -5  -3  -5  382.57   65.73
  -5   3  -5  413.61   87.35
   5  -3   5  554.22  106.51
  -5  -3  -5  517.38  118.94
  -5   3  -5  554.06  105.43
  -5  -3  -5  543.13   85.51
  -5   3  -5  442.52  129.47
  -5   3  -5  323.07  164.05
   5   3   6 6943.73  308.79
  -5  -3  -6 7400.27  301.81
  -5   3  -6 6619.35  284.75
   5  -3   6 6829.96  298.91
  -5   3  -6 7073.95  343.39
  -5  -3  -6 7169.20  359.50
  -5  -3  -6 7522.93  221.82
  -5   3  -6 6783.29  365.24
  -5   3  -6 7020.44  438.95
   5   3   7  429.70   79.78
  -5  -3  -7  574.01  120.71
  -5   3  -7  370.52  119.18
   5  -3   7  388.64  130.80
  -5   3  -7  456.52  103.32
  -5  -3  -7  555.15  162.49
  -5   3  -7  526.45  121.51
  -5   3  -7  484.86  184.45
  -5  -3  -8 1458.16  136.15
  -5   3  -8 1316.16   93.99
   5  -3   8 1720.46  130.94
  -5  -3  -8 1249.44  201.73
  -5   3  -8 1826.89  450.45
  -5  -3  -8 1651.72  377.40
  -5   3  -8 1749.62  121.08
  -5  -3  -9   57.10   28.97
  -5   3  -9   36.51   14.78
   5  -3   9   27.21   15.19
  -5   3  -9  -21.16   51.41
  -5  -3  -9   54.15   25.91
  -5   3  -9   10.21   14.43
  -5  -3 -10   85.16   50.43
  -5  -3 -10   92.09   28.65
  -5   3 -10  136.90   29.68
  -5   3 -11 1308.02  282.87
  -5  -3 -11  897.45  274.30
  -5  -3 -11 1072.01  175.88
  -5   3 -12   56.89   46.16
  -5  -3 -12  141.55   66.97
  -5  -3 -12  175.27   53.13
  -5   3 -12  220.26   52.08
  -5   3 -13 1088.77  141.31
  -5  -3 -13  958.07  208.34
  -5  -3 -13  894.34  242.91
  -5   3 -13  912.07  237.95
  -5   3 -14 3311.22  419.64
  -5  -3 -14 2683.95  561.62
  -5  -3 -14 3579.01  175.10
  -5   3 -14 3165.91  171.50
  -5   3 -15 1382.93  262.85
  -5  -3 -15 1128.80  202.41
  -5  -3 -15 1359.27  383.33
  -5   3 -15 1267.33  395.13
  -5   3 -16  506.84   99.51
  -5  -3 -16  339.47   77.06
  -5  -3 -16  492.44  128.77
  -5   3 -16  392.96  108.79
  -5   3 -17  272.56   58.26
  -5  -3 -17  185.44   74.75
  -5  -3 -17  109.44   98.98
  -5   3 -17  161.80   61.66
  -5   3 -18    6.62   12.75
  -5  -3 -18   50.27   26.96
  -5  -3 -18    9.37   17.50
  -5   3 -18  105.73   46.42
  -5  -3 -19   38.86   32.51
  -5   3 -19  246.47   75.57
  -5   3 -20   99.98   70.38
   5   5 -25    0.02   37.55
   5  -5 -25   64.47   27.88
   5   5 -24  230.06   71.74
   5  -5 -24  368.66  163.07
   5  -5 -23   93.29   42.60
  -5  -5  23   66.04   55.57
   5  -5 -22   42.36   48.08
  -5  -5  22   36.28   51.73
   5  -5 -21  536.39  198.00
  -5  -5  21  341.53   80.83
   5  -5 -20  984.92  251.74
  -5  -5  20  727.71  153.17
   5  -5 -19  113.05   43.59
  -5  -5  19  147.28  107.83
   5  -5 -18  695.22  121.40
  -5  -5  18  529.64  173.82
   5   5 -18  391.45   74.64
   5  -5 -17  105.52   52.23
  -5  -5  17  231.33   68.96
   5   5 -17   71.00   38.94
   5  -5 -16   21.05   72.68
  -5  -5  16  117.78   59.13
   5   5 -16    7.78   18.69
   5  -5 -15  -62.72   73.62
  -5  -5  15  211.70   71.85
  -5  -5  15   14.68   12.33
  -5   5  15   14.58    6.59
   5  -5 -14 5651.15  695.99
  -5  -5  14 5431.12  318.40
  -5   5  14 4567.66  157.30
   5  -5 -13 1336.48  263.89
  -5  -5  13 1689.12  384.74
  -5   5  13 1130.06   52.43
   5  -5 -11 3503.17  401.74
  -5  -5  11 3788.96  203.32
   5  -5 -10 3024.78  304.81
  -5  -5  10 3173.15  158.21
   5  -5  -9 6748.54  340.58
  -5  -5   9 6918.99  342.27
   5  -5  -810417.30  365.01
  -5  -5   8 8728.93  323.67
   5  -5  -7 3826.92  231.29
  -5  -5   7 3946.45  284.04
  -5   5   646821.00 1265.76
   5  -5  -649608.20 1185.42
   5   5  -644168.10 1265.76
  -5  -5   650415.60 1245.00
  -5   5   5 4433.95  224.28
   5  -5  -5 4673.91  269.16
   5   5  -5 4417.74  263.26
  -5  -5   5 4758.98  246.67
  -5   5   425953.90  721.98
   5  -5  -426770.90  762.39
  -5  -5   426569.50  747.57
   5   5  -425860.60  740.33
  -5   5   3 2421.63  107.11
   5  -5  -3 2523.04  155.78
   5   5  -3 2500.54  212.30
  -5  -5   3 2691.58  258.08
   5   5  -3 2610.79   97.58
  -5   5   2 1346.21   89.77
   5  -5  -2 1243.22   71.85
   5   5  -2 1396.14   80.99
  -5  -5   2 1473.36  189.40
   5  -5  -2 1415.48   89.79
   5   5  -2 1334.91   92.16
  -5  -5   2 1403.38   97.43
  -5   5   1  591.11  142.66
   5  -5  -1  602.99  157.29
  -5  -5   1  542.32  131.51
   5   5  -1  544.97  140.66
   5   5  -1  545.01  132.34
  -5  -5   1  596.08   48.97
   5  -5  -1  585.32  149.45
  -5   5   1  529.15  188.98
  -5  -5   1  601.36   56.23
   5   5   0 3414.43  179.80
  -5   5   0 3334.60  161.41
   5  -5   0 3266.89  162.20
  -5  -5   0 3752.17  207.00
   5  -5   0 3480.93  181.84
   5   5   0 3289.61  178.50
  -5   5   0 3620.63  256.60
  -5  -5   0 3412.18  199.81
   5  -5   0 3288.34  182.35
   5   5   0 3443.70  169.25
  -5   5   0 3581.28  189.63
  -5  -5   0 3230.96  162.74
  -5   5  -116883.10  484.56
   5   5   117661.10  509.59
   5  -5   117584.30  493.15
  -5  -5  -116653.20  492.08
  -5  -5  -116892.00  494.30
   5  -5   116771.50  493.78
  -5   5  -117049.90  515.05
   5  -5   116186.50  494.86
   5  -5   116700.60  526.75
   5   5   117344.10  521.48
  -5   5  -117496.10  518.31
  -5  -5  -116973.50  488.84
   5   5   212395.20  489.07
  -5   5  -211702.20  340.59
  -5  -5  -211980.10  370.49
   5  -5   211938.60  369.01
  -5  -5  -212072.70  372.21
   5  -5   211848.90  372.99
  -5   5  -212597.90  502.20
   5  -5   211191.00  355.70
   5   5   211489.80  353.16
  -5   5  -211978.50  384.85
   5   5   3 1939.08   89.47
  -5  -5  -3 1978.19  121.21
  -5   5  -3 2022.22   76.16
   5  -5   3 2020.31  149.34
  -5  -5  -3 1897.32  117.08
  -5   5  -3 1823.27  102.66
   5  -5   3 1855.88   98.29
  -5   5  -3 2112.68  228.22
   5   5   3 2027.55  256.36
  -5   5  -3 2137.77  127.14
   5   5   4 4021.43  204.64
  -5  -5  -4 4217.65  215.18
  -5   5  -4 4063.85  187.30
   5  -5   4 4108.05  194.66
  -5  -5  -4 4197.91  218.34
  -5   5  -4 4459.74  235.45
   5   5   4 3987.56  278.06
  -5   5  -4 4312.76  239.99
   5   5   5 7051.65  316.39
  -5  -5  -5 8166.18  241.94
  -5   5  -5 7248.37  316.43
   5  -5   5 7694.72  218.61
  -5   5  -5 7757.17  261.75
  -5  -5  -5 7208.39  339.53
  -5   5  -5 8101.65  277.19
   5   5   6 4919.73  184.67
  -5  -5  -6 5362.01  257.77
  -5   5  -6 4676.01  172.60
   5  -5   6 5335.49  145.69
  -5   5  -6 5370.40  200.68
  -5  -5  -6 4831.60  213.89
  -5   5  -6 5410.66  203.49
  -5  -5  -7 1000.09  212.73
  -5   5  -7  749.76  177.92
   5  -5   7  824.12  189.61
  -5   5  -7  704.31  143.01
  -5  -5  -7  837.72  219.22
  -5   5  -7  947.27  313.56
  -5  -5  -8 1272.58  272.65
  -5   5  -8  723.17  188.53
   5  -5   8 1077.42  114.75
  -5   5  -8 1335.93  288.71
  -5  -5  -8 1269.95  238.36
  -5   5  -8 1187.23  324.66
  -5  -5  -9 3780.80  219.08
   5  -5   9 3424.55  163.49
  -5   5  -9 3917.34  279.45
  -5  -5  -9 4132.84  221.02
  -5  -5 -10 2595.05  163.08
   5  -5  10 2284.81  208.71
  -5   5 -10 2352.83  163.65
  -5  -5 -10 2659.77  155.81
  -5  -5 -11 1482.90  225.67
   5  -5  11 1364.17  213.02
  -5   5 -11 1456.54  276.52
  -5  -5 -11 1309.17  279.99
  -5   5 -11 1192.02  408.57
  -5  -5 -12  356.45   87.17
   5  -5  12  316.07   94.24
  -5   5 -12  339.89   86.44
  -5  -5 -12  375.61  185.10
  -5   5 -12  323.65  100.29
  -5  -5 -13  151.49   42.77
   5  -5  13  130.20   64.35
  -5   5 -13   66.09   65.42
  -5  -5 -13  105.35   60.15
  -5   5 -13  136.11   62.23
  -5  -5 -14 1478.30  283.07
  -5   5 -14 1539.60  452.08
  -5  -5 -14 1503.67  187.10
  -5   5 -14 1035.24  436.10
  -5   5 -15   98.02   57.98
  -5  -5 -15   84.49   46.49
  -5   5 -15  165.43   82.36
  -5  -5 -15   62.63   30.83
  -5   5 -15   77.73   41.77
  -5   5 -16  152.65   56.53
  -5  -5 -16   83.58   31.17
  -5   5 -16   78.76   40.34
  -5  -5 -16   41.86   27.55
  -5   5 -16  172.94   88.17
  -5   5 -17  894.31  227.99
  -5  -5 -17  773.73  237.85
  -5   5 -17  914.50  225.35
  -5  -5 -17  880.76  191.14
  -5   5 -17  897.23  298.28
  -5   5 -18  191.11   61.96
  -5  -5 -18  147.54   57.82
  -5   5 -18   53.50   32.44
  -5  -5 -18  184.20   47.35
  -5   5 -18  108.72   31.43
  -5  -5 -19  600.77  123.46
  -5   5 -19  863.26  291.10
  -5   5 -20  411.51   84.26
   5  -7 -24   45.93   39.22
  -5  -7  24   19.58   25.63
   5  -7 -23  232.55  259.41
  -5  -7  23  440.06  266.39
   5  -7 -22  190.79   71.26
  -5  -7  22   85.33   69.21
   5  -7 -21  899.40  261.06
  -5  -7  21  515.64  293.29
   5  -7 -20   44.66   34.52
  -5  -7  20  119.34  114.14
   5  -7 -19  981.31  239.62
  -5  -7  19  941.25  203.51
   5  -7 -18   58.30   84.17
  -5  -7  18  100.93   75.91
   5   7 -18   79.19   37.45
   5  -7 -17 2265.05  473.26
  -5  -7  17 2940.04  224.97
   5  -7 -16   -6.48   52.58
  -5  -7  16   94.09   36.72
   5  -7 -15 1734.97  416.17
  -5  -7  15 2086.98  489.40
  -5   7  15 1079.86  146.82
   5  -7 -14 1067.25  250.73
  -5  -7  14 1151.92  278.49
  -5  -7  13   85.13   41.31
   5  -7 -12 1766.91  466.25
  -5  -7  12 1682.77  304.56
   5  -7 -10 1763.86  455.62
  -5  -7  10 1740.66  472.19
   5  -7  -912397.00  485.15
  -5  -7   912880.30  505.38
   5  -7  -8 3415.47  222.23
  -5  -7   8 3656.04  216.07
   5  -7  -711640.70  349.01
  -5  -7   711662.30  417.74
   5  -7  -6 2265.98  198.82
  -5  -7   6 1962.38  121.44
   5  -7  -5 5168.73  268.26
  -5  -7   5 5012.42  275.69
  -5   7   4 2587.43  154.19
   5  -7  -4 2472.97  153.37
  -5  -7   4 2599.95  191.53
  -5   7   3 1916.50  149.43
   5  -7  -3 2070.75  108.84
  -5  -7   3 2038.14  122.67
   5   7  -3 1969.66   73.71
   5  -7  -3 1977.93   87.68
  -5  -7   3 2040.27   93.02
  -5   7   2  408.09   86.65
   5  -7  -2  593.34  133.00
   5   7  -2  362.81  119.02
  -5  -7   2  461.76  107.60
   5   7  -2  396.12   96.34
   5  -7  -2  375.55  133.71
  -5  -7   2  514.03   81.84
  -5   7   2  557.76  131.00
  -5   7   1 1762.95  182.29
   5   7  -1 1864.40   92.24
   5  -7  -1 1838.09   95.68
  -5  -7   1 2007.24  112.13
   5   7  -1 1760.28   72.59
   5  -7  -1 1896.72   89.47
  -5   7   1 1926.10   96.89
  -5  -7   1 1867.69  125.72
   5   7   0 1621.47  126.65
  -5   7   0 1524.66   76.66
   5  -7   0 1598.02  111.63
  -5  -7   0 1668.20  103.40
   5  -7   0 1612.46  109.48
  -5  -7   0 1753.83   81.11
  -5   7   0 1460.68   87.66
  -5   7   0 1569.45  138.21
   5   7   0 1680.02   83.16
  -5  -7   0 1655.19   75.53
  -5   7  -1  271.51   61.66
   5   7   1  311.65   79.33
  -5  -7  -1  560.79  112.31
   5  -7   1  401.72   75.65
   5  -7   1  263.51   72.31
  -5  -7  -1  455.25   72.87
  -5   7  -1  450.87   95.61
   5  -7   1  374.07   83.58
   5   7   1  356.15   67.33
  -5   7  -1  442.72   89.92
   5   7   2  188.72   68.43
  -5   7  -2  185.70   40.47
  -5  -7  -2  309.13   91.91
   5  -7   2  203.24   56.74
   5  -7   2  205.68   36.78
  -5  -7  -2  186.63   50.67
  -5   7  -2  296.49   57.24
   5   7   2  225.01   42.44
   5  -7   2  107.30   32.68
  -5   7  -2  336.87   63.25
  -5  -7  -332400.60  798.08
   5  -7   332598.40  686.87
  -5   7  -331920.80  718.92
  -5  -7  -333020.30  699.42
  -5   7  -332002.60  708.22
   5   7   331663.50  685.65
  -5  -7  -4  122.79   52.75
  -5   7  -4   42.78   24.27
  -5  -7  -4  222.40   54.06
  -5   7  -4  151.89   53.01
   5   7   4   99.55   43.22
  -5  -7  -5 4774.56  209.62
  -5   7  -5 4511.70  167.01
   5  -7   5 4695.52  255.79
  -5   7  -5 5024.32  216.03
  -5  -7  -5 4749.06  195.94
  -5  -7  -6 3844.60  269.43
  -5   7  -6 3026.83  193.98
   5  -7   6 3689.93  234.37
  -5   7  -6 3423.02  240.18
  -5  -7  -6 3740.95  261.01
  -5   7  -6 3867.82  274.65
  -5  -7  -7 4959.48  338.52
   5  -7   7 5050.90  312.34
  -5   7  -7 4957.07  394.43
  -5  -7  -8 1544.49  112.41
   5  -7   8 1428.37  136.20
  -5   7  -8 1446.89  326.46
  -5   7  -8 1349.87  404.16
  -5  -7  -9 2437.03  129.77
   5  -7   9 2372.66  117.50
  -5   7  -9 2367.23  396.00
  -5   7  -9 2229.13  195.76
  -5  -7 -10  475.69  102.32
   5  -7  10  369.86  214.81
  -5   7 -10  405.24   75.88
  -5  -7 -10  428.12   76.09
  -5   7 -10  378.23  142.60
  -5  -7 -11 3259.12  369.29
   5  -7  11 2519.10  291.32
  -5   7 -11 2442.07  519.97
  -5  -7 -11 2818.41  584.37
  -5   7 -11 2238.44  194.57
  -5  -7 -12   31.69   48.49
   5  -7  12   60.07   43.78
  -5   7 -12   50.46   26.92
  -5  -7 -12   46.69   49.79
  -5   7 -12   70.64   55.19
  -5  -7 -13 1126.91  213.85
  -5   7 -13 1188.39  197.32
  -5  -7 -13 1117.95  278.24
  -5   7 -13 1206.56  335.24
  -5  -7 -14   51.22   18.41
   5  -7  14   85.80   30.23
  -5   7 -14   81.07   48.92
  -5  -7 -14  125.33   37.76
  -5   7 -14   96.33   45.21
  -5  -7 -15 1245.43  248.57
   5  -7  15  739.18  266.32
  -5   7 -15 1108.26  223.82
  -5  -7 -15  802.80  134.04
  -5   7 -15  858.83  264.77
  -5  -7 -16   37.76   18.89
   5  -7  16   48.04   36.36
  -5   7 -16   -2.94   41.64
  -5  -7 -16    5.41   33.63
  -5   7 -16   13.05   24.46
  -5  -7 -17  933.79  169.89
  -5   7 -17 1107.04  184.63
  -5  -7 -17  846.76  172.54
  -5   7 -17  703.13  299.05
  -5  -7 -18   19.39   46.19
  -5   7 -18  130.48   70.22
  -5  -7 -18   16.95   24.81
  -5   7 -18   94.69   34.48
  -5  -7 -19   34.29   18.11
  -5   7 -19   79.01   58.83
   5  -9 -24  300.17  114.71
  -5  -9  24  202.96  197.67
   5  -9 -23  453.67  102.94
  -5  -9  23  149.89  166.42
   5  -9 -22  578.64  152.50
  -5  -9  22  664.38  191.96
   5  -9 -21 1236.70  278.18
  -5  -9  21 1362.56  481.87
   5  -9 -20   21.72   43.31
  -5  -9  20  210.39   91.61
   5  -9 -19  509.28  203.39
  -5  -9  19  548.19  128.34
   5  -9 -18  151.39   68.70
  -5  -9  18   43.03   46.01
   5  -9 -17   51.00   33.02
  -5  -9  17   85.06   76.67
   5  -9 -16    9.34   53.81
  -5  -9  16   -0.39   39.41
   5  -9 -15  154.82   60.22
  -5  -9  15  354.02   66.99
   5  -9 -14 8145.76  439.48
  -5  -9  14 8200.02  462.11
   5  -9 -13 1330.79  281.83
  -5  -9  13 1633.79  362.98
   5  -9 -12 2589.66  510.83
  -5  -9  12 2683.52  260.19
   5  -9 -1116063.30  708.74
  -5  -9  1115371.50  575.44
   5  -9 -10   92.92   39.68
  -5  -9  10   48.52   36.80
   5  -9  -8 2718.61  183.89
  -5  -9   8 2648.43  180.02
   5  -9  -7 8386.08  349.98
  -5  -9   7 9295.43  588.99
   5  -9  -6  148.38   90.70
  -5  -9   6  112.45   66.19
   5  -9  -5 1249.85  319.02
  -5  -9   5 1088.46   99.18
   5  -9  -4   20.13   28.40
  -5  -9   4   57.76   50.25
   5   9  -4   20.30   12.12
   5  -9  -3  608.25  193.77
  -5  -9   3  540.86   90.19
   5   9  -3  503.95   85.08
   5  -9  -3  533.03  106.84
   5  -9  -2 4764.54  246.48
  -5  -9   2 4810.24  266.31
   5   9  -2 4531.76  191.82
   5  -9  -2 4654.03  218.64
  -5   9   2 4857.97  231.51
  -5  -9   115258.50  418.72
   5  -9  -114781.50  394.55
   5  -9  -115132.60  641.35
  -5   9   115378.80  377.55
   5  -9   0 1516.03  215.51
  -5  -9   0 1446.86  113.06
   5  -9   0 1387.82   78.75
  -5  -9   0 1435.52   66.25
  -5   9   0 1505.96  106.82
  -5  -9  -1  144.15   40.99
   5  -9   1  159.89   47.64
   5  -9   1   85.30   30.26
  -5   9  -1  134.57   53.56
  -5  -9  -1   61.35   23.59
   5   9   1   64.54   31.93
  -5   9  -1  195.40   71.20
  -5  -9  -2  373.34   75.16
   5  -9   2  248.37   70.06
   5  -9   2  133.71   73.12
  -5  -9  -2  400.82   87.35
  -5   9  -2  445.23  113.99
   5   9   2  236.71  104.99
   5  -9   2  129.29   71.29
  -5   9  -2  370.38   73.83
  -5  -9  -3 3002.60  184.02
   5  -9   3 2706.40  135.51
  -5  -9  -3 2833.44  231.95
  -5   9  -3 3074.06  180.60
   5   9   3 2841.59  168.05
  -5   9  -3 2913.14  144.03
  -5  -9  -4 1482.30  347.72
   5  -9   4 1526.73  201.36
  -5  -9  -4 1392.95  181.88
  -5   9  -4 1463.18  119.61
   5   9   4 1350.16   84.36
  -5  -9  -5  152.44   35.50
   5  -9   5  196.89   50.85
  -5   9  -5  216.74   44.30
  -5  -9  -5  223.90   61.54
  -5  -9  -6  341.59   82.23
   5  -9   6  279.28   85.47
  -5   9  -6  399.45   65.79
  -5  -9  -6  470.27   80.93
  -5  -9  -7 9054.01  445.90
   5  -9   7 8926.53  433.43
  -5   9  -7 9240.78  458.32
  -5  -9  -7 8246.96  424.40
  -5  -9  -8 1021.16  263.58
   5  -9   8 1029.31  297.74
  -5   9  -8 1036.82  255.50
  -5  -9  -9 3153.23  179.56
   5  -9   9 2950.41  144.32
  -5   9  -9 3089.61  521.04
  -5   9  -9 2641.53  165.86
  -5  -9 -10 2761.72  532.39
   5  -9  10 2194.19  149.09
  -5   9 -10 2325.43  400.11
  -5   9 -10 2267.14  612.96
  -5  -9 -11  815.23  202.31
   5  -9  11  883.80  216.87
  -5   9 -11  741.19  222.03
  -5   9 -11  609.80  178.22
  -5  -9 -12   32.11   44.85
  -5   9 -12   56.10   22.19
  -5  -9 -12   22.76   42.40
  -5   9 -12   20.86   53.95
  -5  -9 -13   42.27   37.02
   5  -9  13   11.33   24.80
  -5   9 -13   79.78   33.98
  -5  -9 -13   40.78   23.45
  -5   9 -13   48.39   28.43
  -5  -9 -14 1172.60  333.12
   5  -9  14 1247.08  224.28
  -5   9 -14 1775.90  350.58
  -5  -9 -14 1478.91  330.06
  -5   9 -14 1179.60  323.47
  -5  -9 -15  360.95   81.89
   5  -9  15  131.63   51.59
  -5   9 -15  164.19   66.25
  -5  -9 -15  112.55   50.74
  -5   9 -15  247.48   90.59
  -5  -9 -16  232.69   63.27
   5  -9  16  189.65   66.61
  -5   9 -16  181.28   74.41
  -5  -9 -16  173.71   66.24
  -5   9 -16   73.86   67.71
  -5  -9 -17  586.01  138.97
  -5   9 -17  594.91  194.50
  -5  -9 -17  350.72   61.95
  -5   9 -17  299.28   97.33
  -5  -9 -18   27.68   40.54
  -5   9 -18   83.12   44.97
  -5   9 -18   24.48   28.08
  -5  -9 -19  118.88   60.17
  -5   9 -19  187.97  105.93
  -5 -11  23    8.47   32.27
   5 -11 -22   52.35   30.82
  -5 -11  22   26.70   36.56
   5 -11 -21   81.87   66.58
  -5 -11  21   27.47   40.29
   5 -11 -20   37.76   47.20
  -5 -11  20   48.74   27.12
   5 -11 -19   48.32   51.18
  -5 -11  19   61.03   68.75
   5 -11 -18  786.60  254.27
  -5 -11  18  662.60  147.39
   5 -11 -17   61.75   39.28
  -5 -11  17  119.75   54.92
   5 -11 -16  326.89  108.37
  -5 -11  16  221.47   51.28
   5 -11 -15  339.48  111.36
  -5 -11  15  316.11   54.76
   5 -11 -14   95.37   69.10
  -5 -11  14   93.21   72.55
   5 -11 -13  346.43   97.57
  -5 -11  13  300.60  132.37
   5 -11 -12 3032.99  666.48
  -5 -11  12 3947.30  291.99
   5 -11 -11 3183.66  657.69
  -5 -11  11 3107.40  201.38
   5 -11 -10 5264.45  321.60
  -5 -11  10 5101.91  311.47
   5 -11  -9   34.45   48.92
  -5 -11   9   36.09   43.69
   5 -11  -8 1726.82  409.72
  -5 -11   8 1796.77  357.15
   5 -11  -7  571.94  177.98
  -5 -11   7  448.06  146.51
  -5 -11   6  694.83  140.80
   5 -11  -5  454.57   86.99
   5  11  -5  424.96   74.20
   5 -11  -4 1952.60  432.55
  -5 -11   4 1668.70  452.56
   5  11  -4 1455.62   64.57
   5 -11  -4 1434.84  162.52
   5 -11  -3 3384.99  298.61
  -5 -11   3 4278.69  227.25
   5 -11  -3 3456.06  144.23
  -5  11   3 3562.15  150.67
  -5 -11   216440.30  606.92
   5 -11  -215797.50  708.68
   5 -11  -215149.10  599.69
  -5  11   216302.40  546.88
   5 -11  -1 3354.71  271.05
  -5 -11   1 3621.08  374.22
   5 -11  -1 2914.31  233.05
  -5  11   1 3206.54  272.63
  -5 -11   0  830.71  190.43
   5 -11   0  811.12  155.44
   5 -11   0  620.00  139.80
  -5  11   0  676.35  144.97
  -5 -11  -1 6323.69  406.24
   5 -11   1 6058.88  203.28
   5 -11   1 5911.36  188.50
  -5 -11  -1 5873.94  124.37
  -5  11  -1 6079.94  265.67
   5 -11   2 1104.48  244.99
  -5 -11  -2 1136.17  186.93
  -5  11  -2  935.20  208.17
  -5 -11  -2  976.90  123.75
   5  11   2  723.18  150.03
  -5  11  -2 1033.37  281.66
  -5 -11  -3 3076.23  307.80
   5 -11   3 2988.73  212.16
  -5 -11  -3 3189.41  281.32
  -5  11  -3 3228.96  276.70
   5  11   3 2833.61  224.87
  -5 -11  -4  139.55   57.20
   5 -11   4  168.64   47.86
  -5 -11  -4  121.72   33.92
  -5  11  -4  162.78   53.00
   5  11   4   76.61   35.18
  -5 -11  -5  631.03  152.66
   5 -11   5  585.60  143.44
  -5 -11  -5  544.28  153.79
  -5  11  -5  656.28  143.03
  -5 -11  -6 2082.66  136.08
   5 -11   6 2221.51  216.34
  -5  11  -6 2292.31  430.67
  -5 -11  -6 2395.71  176.26
  -5 -11  -7 1050.88  260.65
   5 -11   7  819.97  202.77
  -5  11  -7  638.50  142.20
  -5 -11  -7  860.01  184.54
  -5 -11  -8 2983.92  636.48
   5 -11   8 2889.72  264.32
  -5  11  -8 2982.10  360.36
  -5 -11  -8 2740.47  178.63
  -5 -11  -9   46.97   32.51
  -5  11  -9   54.38   31.11
  -5 -11 -10  100.50   31.16
   5 -11  10   23.15   25.81
  -5  11 -10   55.47   39.07
  -5  11 -10   43.49   41.77
  -5 -11 -11  174.63   96.13
   5 -11  11  223.25   73.91
  -5  11 -11  303.23  119.83
  -5  11 -11  633.51  235.17
  -5 -11 -12   55.99   50.77
   5 -11  12   22.63   28.60
  -5  11 -12   46.48   36.08
  -5  11 -12   39.17   38.33
  -5 -11 -13  141.62   86.86
   5 -11  13  138.57   51.95
  -5  11 -13  217.01   73.98
  -5 -11 -13  207.92   71.56
  -5  11 -13  171.29   93.25
  -5 -11 -14  493.24  222.73
   5 -11  14  383.95  170.76
  -5  11 -14  835.89  240.95
  -5 -11 -14  751.68  147.88
  -5  11 -14  418.56  183.12
  -5 -11 -15  243.82   74.54
   5 -11  15   55.89   71.47
  -5  11 -15  142.90   57.34
  -5 -11 -15   79.52   36.22
  -5  11 -15   86.78   56.88
  -5 -11 -16  257.22   90.65
  -5  11 -16   61.06   40.03
  -5 -11 -16   68.10   41.30
  -5  11 -16  193.75   65.69
  -5 -11 -17   31.67   57.60
  -5  11 -17   57.50   54.63
  -5 -11 -17  144.53   67.34
  -5  11 -17   22.02   55.89
  -5 -11 -18  416.80  228.19
  -5  11 -18  695.36  100.85
  -5  11 -18  360.09  121.90
   5 -13 -22   40.89   39.05
  -5 -13  22   57.49   63.43
   5 -13 -21   25.43   45.07
  -5 -13  21   53.85   40.32
   5 -13 -20   19.80   48.29
  -5 -13  20   23.14   34.03
  -5 -13  19  187.78  134.51
   5 -13 -18   32.08   36.03
  -5 -13  18   16.44   41.44
   5 -13 -17  162.14   94.45
  -5 -13  17  256.47   71.78
   5 -13 -16 1174.64  401.34
  -5 -13  16 1416.52  312.56
   5 -13 -15  312.63  149.14
  -5 -13  15  269.10   73.83
   5 -13 -14  512.55  167.93
  -5 -13  14  508.98  168.92
   5 -13 -13  199.00  117.65
  -5 -13  13  330.29  102.73
   5 -13 -12  236.07   81.04
  -5 -13  12  330.25  143.08
   5 -13 -11  894.98  272.33
  -5 -13  11  825.13  325.07
   5 -13 -10   83.14   51.70
  -5 -13  10   66.15   52.33
   5 -13  -9  466.35  141.66
  -5 -13   9  656.57  173.02
   5 -13  -8  149.25   74.84
  -5 -13   8  155.74   62.28
   5 -13  -7  180.98   97.95
  -5 -13   7  142.83  108.59
   5 -13  -6  507.23  104.48
  -5 -13   6  510.28  178.16
   5  13  -6  331.34   53.02
   5 -13  -5 1365.66  294.35
  -5 -13   5 1122.56  284.72
   5 -13  -5 1048.52  109.94
   5 -13  -4  158.84  132.95
  -5 -13   4  386.76   99.86
   5 -13  -4  137.84   37.70
  -5  13   4  144.11   62.06
   5 -13  -3 1570.76  357.36
  -5 -13   3 1569.39  496.75
   5 -13  -3  985.15   91.58
  -5  13   3 1331.96  116.56
  -5 -13   2  564.48  141.47
   5 -13  -2  696.66  134.83
   5 -13  -2  420.64   87.49
  -5  13   2  530.15   96.77
  -5 -13   1  517.63   90.10
   5 -13  -1  144.97   82.01
  -5  13   1  312.79   71.64
  -5 -13   0  419.98  100.15
   5 -13   0  246.85   79.52
  -5  13   0  366.06   90.19
  -5 -13  -1  309.63  167.65
  -5  13  -1  392.30   86.11
  -5 -13  -2  285.05   97.29
  -5 -13  -2  281.82   48.21
   5  13   2   74.51   33.52
  -5 -13  -3  541.31  116.22
  -5 -13  -3  394.47  103.92
  -5  13  -3  496.66  137.34
   5  13   3  320.36  120.04
  -5 -13  -4  114.18   43.22
  -5 -13  -4   50.05   22.26
  -5  13  -4  115.45   32.09
   5  13   4   27.42   19.48
  -5 -13  -5 4167.20  491.91
  -5 -13  -5 3358.25  314.04
  -5  13  -5 3745.00  240.05
  -5 -13  -6  361.18   78.10
   5 -13   6  293.38   75.09
  -5 -13  -6  277.31   76.85
  -5  13  -6  282.47   69.46
  -5 -13  -7   91.11   39.89
   5 -13   7   38.55   37.93
  -5 -13  -7   38.52   17.21
  -5  13  -7   47.47   37.80
  -5 -13  -8  759.22  161.95
   5 -13   8  687.85  177.85
  -5 -13  -8  547.73  128.40
  -5  13  -8  681.93  164.53
  -5 -13  -9 1429.62  264.80
   5 -13   9 1505.72  406.35
  -5  13  -9 1314.99  396.69
  -5 -13 -10 1105.66  148.10
   5 -13  10  671.00  237.70
  -5  13 -10  904.59  155.89
  -5 -13 -10  811.34  199.49
  -5 -13 -11  684.15  175.32
   5 -13  11  319.99  208.29
  -5  13 -11  451.64  114.10
  -5 -13 -11  548.57  172.07
  -5 -13 -12 2600.41  468.26
   5 -13  12 3957.36  202.81
  -5 -13 -12 2224.47  552.45
  -5  13 -12 2219.32  573.53
  -5  13 -12 1868.84  592.07
  -5 -13 -13   28.91   23.72
   5 -13  13    9.16   18.00
  -5  13 -13   19.80   25.73
  -5 -13 -13   10.68   17.69
  -5  13 -13   37.61   34.70
  -5 -13 -14   65.84   48.30
   5 -13  14   45.42   29.79
  -5  13 -14   27.07   51.63
  -5 -13 -14   38.14   37.38
  -5 -13 -14   45.76   42.71
  -5  13 -14   33.54   42.67
  -5 -13 -15   24.21   33.43
   5 -13  15    5.34   21.12
  -5  13 -15   68.79   26.08
  -5 -13 -15   30.00   22.62
  -5 -13 -15   48.85   33.09
  -5  13 -15   86.18   48.63
  -5 -13 -16  177.72   55.69
  -5 -13 -16    6.81   18.22
  -5  13 -16   62.28   38.99
  -5 -13 -16   68.58   24.17
  -5  13 -16   37.51   33.05
  -5 -13 -17   -0.89   32.42
  -5 -13 -17   29.35   17.36
  -5  13 -17    3.38   27.83
  -5  13 -17   46.37   22.83
   5 -15 -20   52.96   54.79
  -5 -15  20    9.43   44.96
   5 -15 -19   30.32   39.00
  -5 -15  19  120.30   42.28
   5 -15 -18   59.33   61.64
  -5 -15  18   80.95   58.01
   5 -15 -17   82.13   65.02
  -5 -15  17   47.04   40.41
   5 -15 -16  203.04   93.06
  -5 -15  16  146.92   52.03
   5 -15 -15  691.69  170.31
  -5 -15  15  232.91   84.39
   5 -15 -14  844.51  186.78
  -5 -15  14  917.98  180.08
   5 -15 -13   -2.54   40.49
  -5 -15  13   31.19   43.00
   5 -15 -12  184.86   54.18
  -5 -15  12   49.82   40.58
   5 -15 -11   54.73   69.54
  -5 -15  11  105.25   53.03
   5 -15 -10  412.41   98.52
  -5 -15  10  385.78  105.06
   5 -15  -9   10.50   37.53
  -5 -15   9   80.79   35.92
   5 -15  -8  248.72  105.32
  -5 -15   8  267.79   78.01
   5 -15  -7  217.59  102.85
  -5 -15   7  147.05   53.74
   5 -15  -6  297.29   85.40
  -5 -15   6  245.64  146.84
   5 -15  -5  404.05  122.85
  -5 -15   5  470.30  118.87
  -5  15   5  309.49   78.54
   5 -15  -4   77.41   61.90
  -5 -15   4   69.37   46.44
  -5  15   4   14.08   14.78
   5 -15  -3 1390.60  394.53
  -5 -15   3 1588.85  320.97
  -5  15   3 1493.93   85.79
  -5 -15   2  151.79   96.17
   5 -15  -2   13.64   73.43
  -5  15   2  175.42   45.91
   5 -15  -1  814.01  151.35
  -5 -15   1  989.53  189.22
  -5  15   1  617.95  160.46
  -5 -15   0  899.98  217.34
   5 -15   0 1107.64  212.46
  -5  15   0  544.20  163.61
   5 -15   1 1156.86  261.54
  -5 -15  -1 1244.45  185.89
   5 -15   2 1257.01  320.80
  -5 -15  -2 1271.40  323.68
  -5 -15  -3   79.28   63.02
   5 -15   3   73.00   52.89
  -5 -15  -3   34.51   25.48
  -5 -15  -4 3991.06  212.49
   5 -15   4 3956.22  275.79
  -5 -15  -4 2965.52  194.51
  -5  15  -4 3236.02  272.42
  -5 -15  -5  147.43   66.44
   5 -15   5   58.98   55.60
  -5 -15  -5    7.20   14.07
  -5  15  -5   24.37   13.67
  -5 -15  -6  119.33   68.48
   5 -15   6   45.28   63.70
  -5 -15  -6   13.68    9.38
  -5  15  -6   10.12   25.74
  -5 -15  -7  119.31   80.07
   5 -15   7   80.45   39.66
  -5 -15  -7   25.41   20.85
  -5  15  -7   57.73   29.00
  -5 -15  -8   24.82   50.87
   5 -15   8   45.20   26.04
  -5 -15  -8   -0.94    8.75
  -5  15  -8   17.57   21.78
  -5 -15  -9   72.67   38.30
   5 -15   9   57.60   26.20
  -5  15  -9   46.90   39.39
  -5 -15 -10  137.96   43.25
   5 -15  10  241.23   52.44
  -5  15 -10   29.46   44.10
  -5 -15 -10   89.46   37.34
  -5 -15 -11   29.60   38.12
   5 -15  11   28.28   15.40
  -5  15 -11   24.22   23.46
  -5 -15 -11   30.03   30.01
  -5 -15 -12  110.86   51.48
   5 -15  12   52.75   50.57
  -5  15 -12   49.85   56.36
  -5 -15 -12   27.93    9.62
  -5 -15 -13   29.16   27.17
   5 -15  13   46.46   40.66
  -5  15 -13   59.25   41.39
  -5 -15 -13   38.68   26.66
  -5  15 -13   89.98   37.30
  -5 -15 -14   13.34   49.28
   5 -15  14   15.46   28.93
  -5  15 -14   17.07   17.21
  -5 -15 -14   21.33   11.91
  -5  15 -14   68.21   42.09
  -5 -15 -15   67.50   31.58
  -5  15 -15   69.78   65.56
  -5 -15 -15   39.97   24.71
  -5  15 -15   65.04   33.45
   5 -17 -19  182.81   79.71
  -5 -17  19   35.61   47.01
   5 -17 -18   66.64   66.98
  -5 -17  18   23.25   32.30
   5 -17 -17  164.61   93.80
  -5 -17  17  166.00   60.70
   5 -17 -16  252.94  119.42
  -5 -17  16   51.60   33.74
   5 -17 -15   44.59   40.77
  -5 -17  15   80.54   50.04
   5 -17 -14  180.23  159.06
  -5 -17  14  137.47   55.95
   5 -17 -13   19.62   34.39
  -5 -17  13   35.49   41.63
   5 -17 -12   39.97   65.73
  -5 -17  12   64.01   80.64
   5 -17 -11 2158.01  496.26
  -5 -17  11 2017.02  327.17
   5 -17 -10  667.90  143.87
  -5 -17  10  531.17  280.78
   5 -17  -9  608.68  124.32
  -5 -17   9  420.96  116.33
   5 -17  -8  746.54  181.14
  -5 -17   8  740.32  179.43
   5 -17  -7  149.26   43.61
  -5 -17   7   33.29   64.71
   5 -17  -6  325.62  113.64
  -5 -17   6   99.13   74.38
  -5  17   6  242.25   62.42
   5 -17  -5   86.84   67.35
  -5 -17   5   34.28   44.62
   5 -17  -4   90.39   49.96
  -5 -17   4  255.02   69.14
   5 -17  -3  228.32   52.50
  -5 -17   3  172.64   88.70
   5 -17  -2 2184.76  200.82
  -5 -17   2 2630.60  183.71
  -5 -17   1 1157.97  445.81
   5 -17  -1 1361.03  375.02
  -5 -17   0  248.23  169.94
   5 -17   0  321.40  105.56
   5 -17   1  350.37   94.64
  -5 -17  -1  186.39  131.68
  -5 -17  -2   62.38   39.27
   5 -17   2   90.98   46.02
  -5 -17  -3   83.60   62.41
   5 -17   3  -38.02   28.60
  -5 -17  -4  108.19   85.31
   5 -17   4  131.27   65.68
  -5 -17  -5 1540.03  404.13
   5 -17   5 1157.51  399.94
  -5 -17  -6   44.89   36.95
   5 -17   6   42.53   27.24
  -5  17  -6   14.00   13.24
  -5 -17  -7 1279.74  328.79
   5 -17   7 1127.67  337.45
  -5  17  -7  752.95  220.00
  -5 -17  -8   39.78   37.62
   5 -17   8   48.19   45.29
  -5  17  -8   18.60   13.26
  -5 -17  -9   73.35   71.97
   5 -17   9  137.21   51.95
  -5  17  -9   59.60   23.03
  -5 -17 -10  486.12  114.68
   5 -17  10  443.08  165.96
  -5 -17 -11  226.79   74.11
   5 -17  11  138.59   94.22
  -5 -17 -12  205.96   73.31
   5 -17  12  116.03   89.92
  -5 -17 -13   46.65   39.92
   5 -17  13   32.13   24.89
  -5 -17 -14   89.29   36.64
  -5  17 -14  109.61   82.09
   5 -19 -17   46.40   54.42
   5 -19 -16   83.50   48.63
  -5 -19  16   35.82   44.88
   5 -19 -15   25.71   29.63
  -5 -19  15   33.55   41.42
   5 -19 -14  194.93   58.15
  -5 -19  14   46.21   53.44
   5 -19 -13   89.70   51.66
  -5 -19  13  144.70   85.60
   5 -19 -12  782.80  239.13
  -5 -19  12  978.71  213.92
   5 -19 -11  113.02   84.95
  -5 -19  11  121.31   48.82
   5 -19 -10  307.42  115.74
  -5 -19  10  312.78   79.77
   5 -19  -9  161.19   90.33
  -5 -19   9  164.21   77.72
   5 -19  -8 1332.82  374.18
  -5 -19   8 1611.20  255.41
   5 -19  -7   88.40   55.76
  -5 -19   7  102.54   39.21
   5 -19  -6 2064.46  616.71
  -5 -19   6 2015.34  730.88
   5 -19  -5   12.15   45.27
  -5 -19   5    8.76   53.32
   5 -19  -4  527.71   86.46
  -5 -19   4  657.24  112.53
   5 -19  -3   23.61   54.46
  -5 -19   3   34.49   72.62
   5 -19  -2   31.55   19.86
  -5 -19   2   50.12   49.61
  -5 -19   1   55.53   50.17
   5 -19  -1   48.13   49.52
   5 -19   0   53.27   21.37
  -5 -19   0   59.11   63.52
  -5 -19  -1   85.75   63.73
   5 -19   1  121.56   51.75
  -5 -19  -2  573.04  170.05
   5 -19   2  653.65  203.06
  -5 -19  -3  330.41   79.91
   5 -19   3   95.58  105.07
  -5 -19  -4 1199.72  203.59
   5 -19   4  841.38  272.18
  -5 -19  -5  161.00   70.44
   5 -19   5   37.67   13.07
  -5 -19  -6  804.03  135.13
   5 -19   6  906.03  222.76
  -5 -19  -7   41.29   64.30
   5 -19   7   49.65   42.27
  -5 -19  -8  542.40  180.40
   5 -19   8  464.16  176.25
  -5 -19  -9   22.88   34.74
   5 -19   9   52.78   20.93
  -5 -19 -10  231.29  104.44
   5 -19  10  154.20   76.81
  -5 -19 -11   28.79   40.37
   5 -19  11   32.87   20.55
   5 -21 -14  145.41   88.83
  -5 -21  14   53.93   94.90
   5 -21 -13  192.81   91.09
  -5 -21  13   10.71   33.90
   5 -21 -12  201.97  111.43
  -5 -21  12  142.38   41.49
   5 -21 -11  255.57  100.54
  -5 -21  11  492.50  185.65
   5 -21 -10  148.76   84.51
  -5 -21  10   54.73   47.49
   5 -21  -9  475.86  159.99
  -5 -21   9  288.37  128.52
   5 -21  -8  195.53   62.07
  -5 -21   8  251.07   82.61
   5 -21  -7  534.09  206.69
  -5 -21   7  548.65   91.55
   5 -21  -6    1.89   37.22
  -5 -21   6   20.52   34.93
   5 -21  -5  795.20  218.07
  -5 -21   5  849.88  346.14
   5 -21  -4   40.12   19.84
   5 -21  -3  121.65   60.82
  -5 -21   3  170.32   49.90
   5 -21  -2  450.30  141.09
  -5 -21   2  497.83   80.07
   5 -21  -1  429.91  148.53
  -5 -21   1  846.35  214.81
  -5 -21   0   66.62   51.18
   5 -21   0   93.68   44.06
  -5 -21  -1  824.63  167.92
   5 -21   1  476.25  180.74
  -5 -21  -2   58.70   29.27
   5 -21   2   83.07   51.65
  -5 -21  -3  310.29  156.33
   5 -21   3  259.57   77.02
  -5 -21  -4   53.37   63.73
   5 -21   4  151.39   56.36
  -5 -21  -5  804.93  251.74
   5 -21   5  685.78  219.07
  -5 -21  -6   36.92   52.78
   5 -21   6   33.56   18.10
  -5 -21  -7   41.95   67.98
   5 -21   7   41.64   48.95
  -5 -21  -8   44.80   93.53
   5 -21   8  152.01   69.74
  -5 -21  -9   19.34   69.72
   5 -21   9   79.03   45.63
   5 -23  -9  113.57   69.16
  -5 -23   9  155.15   84.51
   5 -23  -8  475.93  185.63
  -5 -23   8  492.87  221.18
   5 -23  -7  140.52   98.99
  -5 -23   7  190.09   66.36
   5 -23  -6   25.84   31.28
  -5 -23   6   66.76   31.84
   5 -23  -5  597.03  192.44
  -5 -23   5  639.72  264.22
  -5 -23   4   37.87   36.54
   5 -23  -3   31.43   41.47
  -5 -23   3   32.45   53.38
   5 -23  -2   80.67   73.98
  -5 -23   2   70.77   42.51
   5 -23  -1   21.06   43.49
  -5 -23   1   60.56   34.88
   5 -23   0   58.47   35.44
  -5 -23   0   34.33   41.19
  -5 -23  -1  215.12  105.78
   5 -23   1  109.88   96.38
  -5 -23  -2   77.54   83.94
   5 -23   2  160.38   62.07
  -5 -23  -3   88.06   58.10
   5 -23   3   53.36   49.73
  -5 -23  -4   68.19   52.34
   5 -23   4   24.73   45.11
   6   0 -26  532.39  120.79
   6   0 -25   74.29   29.04
   6   0 -24   64.24   33.76
   6   0 -23   33.77   42.86
   6   0 -22  728.96  151.62
   6   0 -21   98.05   75.34
   6   0 -20 2562.31  419.02
   6   0 -19  -34.76   55.04
   6   0 -18 4855.11  374.91
   6   0 -17   24.77   51.24
   6   0 -16 8545.56  481.03
  -6   0  15   43.76   63.58
  -6   0  14   58.09   42.42
  -6   0  12 8988.63  373.98
  -6   0  11  -28.66   71.13
  -6   0  1074723.60  763.66
  -6   0   9  -52.60   67.28
   6   0  -9   11.63    8.73
   6   0  -842687.30 1166.53
  -6   0   848245.70 1156.40
  -6   0   846110.70 1196.89
   6   0  -846610.30 1196.90
  -6   0   7  -57.56   53.89
   6   0  -7  -26.21   32.50
  -6   0   7   19.52   14.90
   6   0  -7   17.11   13.15
  -6   0   6  495.66   86.52
   6   0  -6  488.27   74.60
  -6   0   6  378.05   45.76
   6   0  -6  421.36   67.41
   6   0  -5   18.86   20.47
  -6   0   5    9.94   23.87
  -6   0   5  -15.22   29.18
   6   0  -5   -6.61   25.10
  -6   0   5  -28.89   31.65
   6   0  -4 1175.36   82.31
  -6   0   4 1255.47   79.09
  -6   0   4 1298.43   78.39
   6   0  -4 1194.79   69.35
  -6   0   4 1289.33   85.06
   6   0  -3   -0.52   23.34
  -6   0   3   16.99   18.67
   6   0  -3   19.61   26.67
  -6   0   3  -23.29   37.33
   6   0  -3    4.39   27.33
  -6   0   3   24.67   22.14
   6   0  -2  176.45   44.68
  -6   0   2  254.52   57.96
   6   0  -2  139.26   74.54
  -6   0   2  133.28   53.57
   6   0  -2  155.38   39.99
  -6   0   2  135.74   44.16
  -6   0   2  141.07   73.08
   6   0  -1   10.74   11.85
   6   0  -1   24.32   37.45
  -6   0   1  -14.43   45.80
  -6   0   1   -4.78   44.25
   6   0  -1  -44.27   32.87
  -6   0   1   55.46   34.80
   6   0  -1   21.68   27.27
  -6   0   1  -30.77   56.41
   6   0   015127.00  169.24
   6   0   015774.20  320.89
  -6   0   015057.80  296.65
  -6   0   014291.40  288.91
   6   0   015476.10  286.07
  -6   0   015374.80  333.62
   6   0   014534.70  288.29
   6   0   014341.40  358.72
  -6   0   014673.90  285.48
   6   0   1   15.69   26.63
  -6   0  -1   22.86   32.53
  -6   0  -1   33.69   61.67
   6   0   1  -13.28   33.15
   6   0   1    3.93   14.02
  -6   0  -1   78.45   40.96
   6   0   1   -1.53   29.63
  -6   0  -1  -39.57   57.62
  -6   0  -227411.10  700.93
  -6   0  -227233.50  832.06
   6   0   226347.40  748.51
   6   0   226359.90  753.27
  -6   0  -229248.70  827.80
  -6   0  -228513.40  874.76
   6   0   228228.40  796.06
  -6   0  -228402.00  810.41
  -6   0  -3    0.86    5.60
  -6   0  -3   63.51   38.35
  -6   0  -3  -74.19   57.81
  -6   0  -3   61.79   33.35
  -6   0  -3  -35.25   62.31
  -6   0  -4 6124.39  253.95
  -6   0  -4 6414.35  314.52
  -6   0  -4 6832.03  328.88
  -6   0  -4 6747.44  323.73
  -6   0  -5   10.17    9.44
  -6   0  -5    1.78   11.58
  -6   0  -5   -7.53   51.56
  -6   0  -5   99.99   46.86
  -6   0  -5   -3.33   56.16
  -6   0  -611638.20  381.52
  -6   0  -611204.00  368.76
  -6   0  -611847.20  466.51
  -6   0  -611583.40  495.36
  -6   0  -611546.10  458.49
  -6   0  -7  -10.15   22.41
  -6   0  -7   16.91   16.55
  -6   0  -7  -21.10   67.82
  -6   0  -7   58.99   47.18
  -6   0  -7  -49.00   61.41
  -6   0  -836829.80 1105.51
  -6   0  -834527.20 1030.94
  -6   0  -834481.30 1162.42
  -6   0  -837682.90 1195.14
  -6   0  -9   -7.40   27.46
  -6   0  -9   11.68   16.35
  -6   0  -9  -99.08   63.84
  -6   0  -9   22.88   35.39
  -6   0  -9  -50.31   51.62
  -6   0 -10  240.31   64.08
  -6   0 -10  208.94  130.74
  -6   0 -10   93.21   68.53
  -6   0 -11  -21.65   25.32
  -6   0 -11  -23.01   66.51
  -6   0 -11   17.99   25.32
  -6   0 -11   28.39   31.99
  -6   0 -12 6546.97  368.27
  -6   0 -12 6277.46  517.38
  -6   0 -12 7236.66  545.98
  -6   0 -12 6822.18  259.57
  -6   0 -13   15.12   12.79
  -6   0 -13   52.10   49.17
  -6   0 -13   57.10   46.58
  -6   0 -13   19.82   21.83
  -6   0 -14   47.37   22.42
  -6   0 -14   76.14   40.00
  -6   0 -14   56.28   34.85
  -6   0 -15   52.54   23.33
  -6   0 -15   19.80   30.36
  -6   0 -15   24.01   33.21
  -6   0 -16  193.69   47.78
  -6   0 -16  304.54   75.40
  -6   0 -17    3.85   33.35
  -6   0 -17   22.96   38.33
  -6   0 -18 1613.87  374.77
  -6   0 -19   76.70   49.30
  -6   0 -20 1051.04  291.38
   6   2 -26   94.76   64.36
   6  -2 -26   95.54   87.30
   6  -2 -25   32.56   43.36
   6   2 -25   53.73   34.31
   6   2 -24  560.43  116.53
   6  -2 -24  365.29  131.05
   6   2 -23  355.31  113.67
   6  -2 -23  290.94  106.38
   6   2 -22  542.10  151.22
   6  -2 -22  665.90  191.92
   6  -2 -21  461.32  141.36
   6   2 -21  321.63  114.70
   6  -2 -20 1503.55  217.34
   6   2 -20 1549.91  270.54
   6  -2 -19   95.95   49.90
  -6  -2  19   92.91   64.55
   6  -2 -18 1052.52  233.84
  -6  -2  18  950.75  169.75
   6  -2 -17 3474.80  276.94
  -6  -2  17 3195.46  233.49
   6  -2 -16 2245.52  389.61
  -6  -2  16 1938.02  522.40
   6  -2 -15  101.47   36.89
  -6  -2  15   34.57   49.55
  -6  -2  15    8.55    3.96
   6   2 -15   -0.28    2.45
   6  -2 -1420020.00 1036.21
  -6  -2  1421349.80  804.11
  -6  -2  1420011.90  570.57
  -6  -2  1310649.90  331.53
   6  -2 -12 3448.32  196.42
  -6  -2  12 3145.96  197.08
   6  -2 -1112681.90  372.98
  -6  -2  1114220.40  573.21
   6  -2 -10 6180.29  309.43
  -6  -2  10 6553.97  355.18
   6  -2  -9  926.39  169.90
  -6  -2   9  976.17  172.97
   6  -2  -8  122.01   50.45
  -6  -2   8   87.67   48.29
   6  -2  -8   41.10   77.08
   6  -2  -8  119.42   27.85
   6  -2  -7 1090.36  294.92
   6   2  -7  919.94  233.94
   6  -2  -7  911.63   71.65
  -6  -2   7 1165.14   89.46
   6  -2  -7 1038.35   60.45
  -6   2   7 1110.09   93.02
   6  -2  -6 8895.62  294.39
   6   2  -6 8370.70  244.12
  -6  -2   6 8449.70  267.11
   6  -2  -6 8611.53  247.68
   6  -2  -6 8447.05  232.87
  -6   2   6 8845.77  236.49
   6  -2  -5  315.14   60.45
   6   2  -5  447.47   93.29
  -6  -2   5  379.72  112.86
   6  -2  -5  315.14   58.74
   6  -2  -5  320.51   65.58
  -6   2   5  465.21   82.18
  -6   2   5  284.55  129.75
   6  -2  -4 2802.05  110.05
   6   2  -4 2824.58  109.79
  -6  -2   4 3062.18  119.67
   6  -2  -4 2822.37  106.66
   6  -2  -4 2516.19  103.15
  -6   2   4 2832.53  136.72
  -6   2   4 3068.33  119.87
   6  -2  -3  711.15  149.49
   6   2  -3  597.00  139.66
  -6  -2   3  742.15  168.36
   6  -2  -3  720.90  140.31
   6  -2  -3  766.08  207.22
   6   2  -3  581.43  170.71
   6  -2  -3  750.63  164.44
  -6   2   3  825.70  185.22
   6  -2  -3  710.67  183.17
  -6   2   3  677.68  160.57
   6   2  -3  667.62  133.91
   6  -2  -2 1638.89   65.31
   6   2  -2 1592.81   79.10
  -6  -2   2 1739.51   69.62
   6  -2  -2 1629.12   64.73
   6  -2  -2 1414.53  117.49
   6   2  -2 1710.07   87.31
   6  -2  -2 1692.39   94.96
  -6   2   2 1530.88   92.32
  -6  -2   2 1740.66   89.37
  -6   2   2 1806.35  264.62
  -6   2   2 1789.68  246.47
   6  -2  -2 1586.12  115.52
   6   2  -2 1811.71   94.02
   6  -2  -116950.40  226.33
  -6  -2   117101.90  241.41
   6  -2  -116305.40  204.72
   6   2  -116903.40  325.04
  -6   2   116294.20  300.31
  -6   2   117170.20  317.88
  -6   2   117629.40  319.63
  -6  -2   116653.70  325.96
   6  -2  -116090.30  374.61
  -6   2   117430.40  314.29
   6   2  -117403.70  304.85
   6   2   0 2904.66  142.44
  -6  -2   0 2904.52  137.45
   6  -2   0 2718.44  116.32
   6  -2   0 2840.91  158.87
   6   2   0 3034.89  262.75
  -6   2   0 2915.28  168.07
  -6  -2   0 2804.22  159.61
   6  -2   0 2926.08  162.02
  -6  -2   0 2803.29  166.18
  -6   2   0 2700.81  161.90
   6   2   0 2850.81  157.23
  -6   2   0 3134.66  184.18
  -6  -2   0 2953.27  167.65
   6  -2   0 2717.02  150.07
  -6   2   0 2981.97  225.44
   6  -2   0 2657.63  150.84
   6   2   0 2985.40  242.22
   6   2   1 4691.75  205.99
  -6  -2  -1 4937.66  218.00
  -6  -2  -1 4856.37  287.73
   6  -2   1 4397.10  259.97
   6   2   1 4540.17  227.42
  -6   2  -1 4738.40  243.94
   6  -2   1 4385.87  223.20
  -6  -2  -1 4659.59  243.40
  -6   2  -1 4610.87  255.62
   6   2   1 4634.68  252.63
   6  -2   1 4548.49  228.36
  -6  -2  -1 4907.40  248.04
  -6   2  -1 4467.01  236.16
   6  -2   1 4220.65  217.93
  -6   2  -1 4551.84  238.11
   6   2   1 3863.23  261.93
   6   2   2  527.57  110.10
  -6   2  -2  458.44   41.18
  -6  -2  -2  433.99   69.65
  -6  -2  -2  590.94   88.27
  -6   2  -2  505.28  121.54
   6  -2   2  458.49   63.06
   6  -2   2  442.03  179.68
  -6  -2  -2  597.46  169.28
  -6   2  -2  505.29  103.05
   6   2   2  471.84   86.11
   6  -2   2  432.77  133.57
  -6   2  -2  607.26  169.59
  -6  -2  -2  611.23  134.93
  -6   2  -2  620.79  169.90
   6  -2   2  314.36   93.66
   6   2   2  525.69   92.20
   6   2   316859.20  463.81
  -6  -2  -317024.00  477.30
  -6   2  -316332.10  522.67
  -6  -2  -316836.80  519.86
  -6  -2  -317129.10  605.59
  -6   2  -317083.70  537.85
  -6  -2  -318093.20  550.19
  -6   2  -316614.30  560.05
  -6   2  -317701.00  547.46
   6   2   4  252.97   41.63
  -6  -2  -4  259.54   69.21
  -6   2  -4  307.56   61.36
  -6   2  -4  305.18   58.29
  -6  -2  -4  220.11   58.72
  -6  -2  -4  286.22   95.43
  -6   2  -4  138.07   51.31
  -6   2  -4  423.30  109.78
  -6   2  -4  332.90   84.06
  -6   2  -514021.90  315.16
   6   2   513878.10  320.53
  -6  -2  -514536.20  344.69
  -6   2  -513371.30  382.48
  -6  -2  -514119.10  512.04
  -6  -2  -514458.60  505.80
  -6   2  -514738.50  412.33
  -6   2  -514898.00  409.98
  -6   2  -611456.00  381.55
  -6  -2  -611473.20  399.04
  -6   2  -610701.30  356.98
  -6  -2  -611129.80  390.83
  -6   2  -611674.50  448.03
  -6  -2  -611455.80  494.94
  -6  -2  -611484.00  440.49
  -6   2  -611901.80  469.04
  -6   2  -611436.20  436.28
  -6   2  -7    9.17   11.69
  -6  -2  -7   16.24   15.94
  -6   2  -7   14.23   11.47
  -6  -2  -7    5.28   20.43
  -6   2  -7   57.42   42.45
  -6  -2  -7   34.61   41.44
  -6  -2  -7   56.80   51.53
  -6   2  -7    1.18   39.78
  -6   2  -7    0.20   46.71
  -6   2  -8 3299.88  246.52
  -6  -2  -8 3391.30  261.10
  -6   2  -8 3131.65  199.58
  -6  -2  -8 2769.21  235.79
  -6   2  -8 3380.63  254.31
  -6  -2  -8 4003.71  269.74
  -6   2  -8 3955.58  284.58
  -6   2  -8 3179.08  306.97
  -6   2  -9 5915.87  288.97
  -6  -2  -9 6672.45  579.32
  -6   2  -9 5277.28  257.96
  -6  -2  -9 5776.22  325.30
  -6   2  -9 5784.94  434.98
  -6  -2  -9 6930.73  508.84
  -6   2  -9 6462.00  340.25
  -6   2 -10  572.40   88.49
  -6  -2 -10  550.49   79.00
  -6   2 -10  517.47   85.90
  -6  -2 -10  484.35   92.19
  -6   2 -10  516.55  132.75
  -6  -2 -10  522.97  107.94
  -6   2 -10  352.14  133.14
  -6   2 -11  886.56  143.55
  -6  -2 -11  801.56  185.79
  -6   2 -11 1144.36  322.99
  -6   2 -11  835.35  330.79
  -6  -2 -11 1025.11  281.87
  -6   2 -11 1192.75  118.46
  -6   2 -12  324.80   76.49
  -6  -2 -12  169.65   67.51
  -6   2 -12  418.81   69.49
  -6  -2 -12  354.69  174.23
  -6   2 -12  327.11  167.69
  -6   2 -13   59.16   30.18
  -6  -2 -13   37.46   31.39
  -6   2 -13   80.04   51.88
  -6  -2 -13  171.15   58.84
  -6   2 -13  124.61   57.25
  -6   2 -14   80.28   36.03
  -6  -2 -14   72.81   42.54
  -6   2 -14   68.91   49.08
  -6  -2 -14  122.02   60.78
  -6   2 -14   55.05   58.68
  -6   2 -15 2523.66  234.53
  -6  -2 -15 1802.82  400.34
  -6   2 -15 1784.84  413.60
  -6  -2 -15 2143.78  325.79
  -6   2 -15 1913.85  539.58
  -6   2 -16  305.68  103.56
  -6  -2 -16  164.74   56.49
  -6   2 -16  276.02   81.78
  -6  -2 -16  139.01   67.57
  -6   2 -16  148.88   84.34
  -6   2 -17   50.59   40.60
  -6  -2 -17   59.96   27.62
  -6   2 -17  122.73   77.45
  -6  -2 -17  151.26   83.01
  -6  -2 -17   59.02   49.11
  -6   2 -17   45.65   44.68
  -6  -2 -18  186.04   57.13
  -6   2 -18  455.43  130.88
  -6  -2 -18  523.64  105.58
  -6  -2 -18  258.04   70.76
  -6   2 -19  365.06   96.51
  -6  -2 -19  281.76   58.36
  -6   2 -20    0.39   36.37
   6  -4 -25  209.56   97.02
   6   4 -25  378.89  109.92
   6  -4 -24   79.99   63.62
   6   4 -24   89.71   78.55
   6  -4 -23  446.40  111.58
   6   4 -23  455.76  144.00
   6  -4 -22   60.99   72.76
  -6  -4  22   64.45   31.16
   6  -4 -21  675.06  231.65
  -6  -4  21  579.75  142.14
   6  -4 -20  148.42   68.79
  -6  -4  20  117.76   44.04
   6  -4 -19 1119.02  253.76
  -6  -4  19 1197.27  317.38
   6  -4 -18 3286.39  277.80
  -6  -4  18 3610.46  250.38
   6  -4 -17 1102.63  202.80
  -6  -4  17  933.94  297.75
   6   4 -17  673.47   87.62
   6  -4 -16  210.03   87.05
  -6  -4  16  133.11   54.16
  -6  -4  16   89.43   33.02
   6   4 -16  199.00   67.87
   6  -4 -15  495.85   95.85
  -6  -4  15  634.60  168.21
  -6  -4  15  349.20   91.41
   6  -4 -14 8049.59  590.99
  -6  -4  14 9349.88  417.74
   6  -4 -13 5190.61  367.38
  -6  -4  12  997.27  269.21
   6  -4 -12  723.73   41.71
   6  -4 -11  908.89  147.24
  -6  -4  11  952.10  228.44
   6  -4 -11  648.11   57.05
   6  -4 -10  214.65   87.06
  -6  -4  10   44.42   43.20
   6  -4 -10   45.52   21.28
   6  -4  -9  533.83   84.04
  -6  -4   9  749.95  183.72
   6  -4  -9  373.49   51.98
   6  -4  -8 7700.03  371.48
  -6  -4   8 7983.94  283.95
   6  -4  -8 7540.67  331.10
  -6   4   7  155.03   35.61
   6  -4  -7   -2.54   54.42
  -6  -4   7  114.76   41.62
   6  -4  -7   53.85   18.79
  -6   4   6 1238.20  255.31
   6  -4  -6 1415.36  107.61
   6   4  -6 1175.83  213.75
  -6  -4   6 1481.33  250.26
   6  -4  -6 1237.39  114.72
  -6   4   511223.90  354.54
   6  -4  -511469.00  361.01
   6   4  -510998.50  346.41
  -6  -4   512265.10  535.10
   6  -4  -511602.50  357.19
  -6   4   4 7969.81  239.60
   6  -4  -4 8141.80  281.82
   6   4  -4 7760.50  350.77
  -6  -4   4 8417.64  283.03
   6  -4  -4 8464.45  276.52
  -6   4   3 4681.35  220.32
   6  -4  -3 4836.88  228.66
   6   4  -3 5119.25  365.39
  -6  -4   3 4580.49  223.78
   6   4  -3 4534.85  217.99
   6  -4  -3 4582.79  225.64
   6  -4  -3 4671.69  244.14
  -6   4   3 4611.90  231.28
  -6   4   2  669.52  133.59
   6  -4  -2 1002.11  171.93
   6   4  -2  826.72   93.02
  -6  -4   2  801.81   96.64
   6  -4  -2  734.22  172.14
   6   4  -2  786.89  158.48
   6  -4  -2  684.74  142.60
  -6  -4   2  840.59  232.81
  -6   4   2  800.41  178.28
  -6   4   2  807.44  171.09
  -6   4   1 5200.22  243.69
   6  -4  -1 5179.57  237.32
   6   4  -1 4947.77  246.78
  -6  -4   1 5497.15  256.15
   6   4  -1 5180.91  244.21
  -6  -4   1 4903.28  241.36
   6  -4  -1 5011.28  266.27
  -6   4   1 4764.70  239.08
   6  -4  -1 4875.63  258.99
  -6  -4   1 5484.39  275.66
  -6   4   1 4878.20  329.05
  -6   4   1 5386.69  272.51
  -6   4   0 1817.31  127.63
   6   4   0 1747.47   75.76
  -6  -4   0 1614.55  156.47
   6  -4   0 1899.45   90.43
   6  -4   0 1837.28   94.99
   6   4   0 1525.89  145.53
  -6   4   0 1797.34  119.76
  -6  -4   0 1815.89  177.89
   6  -4   0 1667.21   94.02
   6   4   0 1720.28   88.46
  -6   4   0 1785.46  124.54
   6  -4   0 1490.83   92.05
  -6  -4   0 1942.52  259.17
  -6   4   0 1840.04  164.51
  -6   4  -1 8678.17  270.66
   6   4   1 8348.39  262.83
  -6  -4  -1 8916.32  294.86
   6  -4   1 8850.36  256.83
  -6  -4  -1 8968.95  304.49
   6  -4   1 8188.79  307.24
   6   4   1 7886.13  285.99
  -6   4  -1 8730.50  302.89
   6  -4   1 8143.16  265.83
  -6  -4  -1 8592.05  289.08
  -6   4  -1 9247.36  318.15
  -6   4  -1 9151.05  344.22
   6   4   2  469.54   46.39
  -6   4  -2  477.93   58.05
  -6  -4  -2  403.96   72.04
   6  -4   2  445.51   43.65
  -6   4  -2  392.88  112.11
  -6  -4  -2  470.73  114.72
   6   4   2  504.34  106.77
  -6   4  -2  511.83  110.74
  -6  -4  -2  662.33  187.20
  -6   4  -2  517.79  140.06
   6   4   3  878.25  196.45
  -6  -4  -3 1076.31  248.24
  -6   4  -3  983.90   75.76
   6  -4   3 1095.29   95.34
  -6   4  -3 1269.52  331.16
  -6  -4  -3 1015.96   81.88
   6   4   3  885.81  263.41
  -6   4  -3 1227.34   98.89
  -6   4  -3 1193.96  111.32
   6   4   4 4433.88  208.50
  -6  -4  -4 4407.07  209.63
  -6   4  -4 4421.68  206.98
   6  -4   4 4647.96  228.58
  -6   4  -4 4542.58  252.88
  -6  -4  -4 4537.16  238.08
  -6  -4  -4 5098.39  263.43
  -6   4  -4 4775.33  259.01
  -6   4  -4 4775.35  257.78
   6   4   5 3756.56  147.12
  -6  -4  -5 3837.93  158.31
  -6   4  -5 3424.19  121.85
   6  -4   5 3420.40  123.67
  -6   4  -5 4096.84  191.66
  -6  -4  -5 3777.58  180.36
  -6  -4  -5 3735.79  184.93
  -6   4  -5 3880.89  237.94
   6   4   6 5793.34  227.23
  -6  -4  -6 6215.44  409.91
  -6   4  -6 5496.75  191.00
   6  -4   6 5956.57  249.89
  -6   4  -6 6115.90  276.37
  -6  -4  -6 6043.72  279.96
  -6  -4  -6 5854.18  288.08
  -6   4  -6 5553.80  263.62
   6   4   7 6953.24  319.04
  -6  -4  -7 6753.25  267.40
   6  -4   7 6840.51  254.34
  -6   4  -7 6955.96  335.51
  -6  -4  -7 6845.95  299.42
  -6  -4  -7 7416.23  362.18
  -6   4  -7 6978.19  304.69
  -6  -4  -8  820.15  210.83
  -6   4  -8  586.39  147.75
   6  -4   8  815.29  206.63
  -6   4  -8  971.00  167.44
  -6  -4  -8  825.18  275.35
  -6  -4  -9 2548.49  193.46
  -6   4  -9 1762.40  184.23
   6  -4   9 2367.38  133.13
  -6   4  -9 2329.58  504.17
  -6  -4  -9 2444.52  173.89
  -6  -4  -9 2357.05  175.28
  -6  -4 -10 1841.16  253.09
   6  -4  10 1642.94  359.09
  -6   4 -10 1695.74  409.95
  -6  -4 -10 1680.06  423.97
  -6   4 -10 1780.45  441.32
  -6   4 -11   31.03   35.15
  -6  -4 -11   29.88   22.65
  -6   4 -11   68.71   38.68
  -6  -4 -11  130.59   51.33
  -6   4 -11   65.21   41.69
  -6   4 -12  478.32   79.91
  -6  -4 -12  519.84  156.14
  -6   4 -12  731.59  144.84
  -6  -4 -12  509.30  154.65
  -6   4 -12  531.57  194.47
  -6   4 -13   33.02   15.29
  -6  -4 -13   14.27   35.73
  -6   4 -13  133.88   62.87
  -6  -4 -13   74.96   38.28
  -6   4 -13   34.12   54.21
  -6   4 -14  259.53   65.48
  -6  -4 -14   25.02   55.19
  -6   4 -14  253.50   67.56
  -6  -4 -14  123.64   45.99
  -6   4 -14   81.70   75.21
  -6   4 -15 1269.86  271.65
  -6  -4 -15 1277.76  239.83
  -6   4 -15 1322.03  395.79
  -6  -4 -15 1323.47  205.55
  -6   4 -15 1279.55  337.03
  -6   4 -16  239.18   56.00
  -6  -4 -16  285.82   73.81
  -6   4 -16  204.69   96.42
  -6  -4 -16  285.15   92.06
  -6   4 -16  120.50   79.23
  -6  -4 -17   42.36   23.55
  -6   4 -17   88.62   48.35
  -6  -4 -17   40.29   24.12
  -6   4 -17    9.74   34.22
  -6  -4 -18   92.83   24.68
  -6   4 -18  142.21   92.12
  -6  -4 -18  142.98   52.28
  -6  -4 -18   78.78   52.09
  -6   4 -18   70.20   37.67
  -6  -4 -19   16.68   23.77
  -6   4 -19   52.80   40.36
   6  -6 -25   51.80   47.31
   6  -6 -24   -3.99   63.03
  -6  -6  24   44.85   30.42
   6  -6 -23   69.94   43.25
  -6  -6  23   32.57   72.46
   6  -6 -22   34.26   30.59
  -6  -6  22   37.18   53.94
   6  -6 -21  226.32  112.12
  -6  -6  21   97.92   88.87
   6  -6 -20   94.19   82.82
  -6  -6  20    9.47   28.64
   6  -6 -19  666.15  357.02
  -6  -6  19  797.67  198.55
   6  -6 -18  170.92  116.11
  -6  -6  18   98.30   47.22
   6   6 -18   26.57   17.64
   6  -6 -17  356.01   92.43
  -6  -6  17  260.26   67.97
   6  -6 -16   73.47   26.69
  -6  -6  16  124.40   66.31
  -6  -6  15 3002.38  207.45
  -6   6  15 2249.35   88.53
   6  -6 -14 1076.96  185.62
  -6  -6  14 1196.15  173.11
   6  -6 -13 1555.53  373.36
  -6  -6  13 1925.23  455.06
   6  -6 -12 2947.61  611.88
  -6  -6  12 3142.78  239.52
   6  -6 -11   59.41   76.48
   6  -6 -10 1544.82  208.28
  -6  -6  10 1407.90  147.46
   6  -6  -9 3339.87  204.52
  -6  -6   9 4231.31  245.54
   6  -6  -8 7433.16  232.15
  -6  -6   8 6855.75  337.63
   6  -6  -7  236.04  102.56
  -6  -6   7  367.49   69.58
   6  -6  -619186.30  611.98
  -6  -6   620591.50  755.25
  -6   6   5 2020.89  117.38
   6  -6  -5 2058.14  234.85
  -6  -6   5 1956.10  121.03
  -6   6   4  426.62   73.60
   6  -6  -4  409.05   97.79
   6   6  -4  292.20  109.15
  -6  -6   4  386.22   74.66
  -6   6   3 6547.74  303.57
   6  -6  -3 6635.40  308.11
   6   6  -3 6105.61  290.17
  -6  -6   3 7072.31  370.17
   6   6  -3 6711.00  298.05
   6  -6  -3 6381.49  320.76
  -6  -6   3 7106.94  316.19
  -6   6   2 1283.75   76.11
   6  -6  -2 1190.16   84.63
   6   6  -2 1165.85  149.25
  -6  -6   2 1254.61  100.78
   6   6  -2 1157.42  145.07
   6  -6  -2 1227.77   71.64
  -6  -6   2 1396.35   74.60
  -6   6   2 1295.52   90.74
  -6   6   1  253.96   62.18
   6  -6  -1  351.03   83.09
  -6  -6   1  183.88  103.67
   6   6  -1  392.67   97.72
   6   6  -1  379.40   64.16
   6  -6  -1  352.20  129.74
  -6  -6   1  338.55   84.92
  -6   6   1  432.58  108.86
  -6  -6   1  390.66   68.88
  -6   6   0 1023.66  154.54
   6   6   0 1021.74  211.42
  -6  -6   0 1087.90   81.99
   6  -6   0  928.51  118.85
   6  -6   0  982.13  200.68
   6   6   0  918.02  197.47
  -6   6   0 1229.27  225.59
  -6  -6   0 1042.92   95.85
  -6   6   0 1168.10  151.05
   6   6   0 1072.78   57.97
  -6  -6   0 1250.44  172.33
   6   6   1  872.58  213.57
  -6   6  -1  850.13   78.87
   6  -6   1  908.95  202.57
  -6  -6  -1  965.07  238.94
   6  -6   1  825.91  202.78
  -6   6  -1  866.67  180.11
  -6  -6  -1  805.94  213.73
   6   6   1  792.89  185.66
   6  -6   1  781.44  201.16
  -6  -6  -1 1030.64  213.53
  -6   6  -1 1132.91  219.03
   6   6   2 5850.45  275.91
  -6   6  -2 6263.58  270.26
  -6  -6  -2 6139.44  297.12
   6  -6   2 6103.01  272.11
  -6  -6  -2 6156.69  315.32
  -6   6  -2 5991.27  300.53
   6   6   2 5863.31  285.38
  -6   6  -2 6182.31  316.88
   6   6   3 6130.86  284.25
  -6  -6  -3 6071.89  316.81
  -6   6  -3 6004.63  274.81
   6  -6   3 6193.97  282.34
  -6   6  -3 6840.05  331.18
  -6  -6  -3 6312.22  360.03
   6   6   3 5476.58  260.22
  -6   6  -3 6263.21  315.19
  -6   6  -3 6508.69  331.36
   6   6   4 4587.56  390.27
  -6  -6  -4 5102.24  219.52
  -6   6  -4 4566.89  155.97
   6  -6   4 4938.54  198.31
  -6   6  -4 4974.72  216.28
  -6  -6  -4 4758.30  221.25
  -6   6  -4 4823.87  219.27
  -6   6  -4 4780.29  340.42
  -6  -6  -5 1093.93  274.95
  -6   6  -5 1033.82   84.83
   6  -6   5 1112.01   89.17
  -6   6  -5 1093.91  313.73
  -6  -6  -5 1355.57  286.96
  -6   6  -5 1217.04  327.40
  -6  -6  -6 1470.16  103.33
  -6   6  -6 1077.24   88.53
   6  -6   6 1292.09  126.35
  -6   6  -6 1441.03  281.91
  -6  -6  -6 1214.53  326.64
  -6   6  -6 1332.85  365.79
  -6  -6  -7 3773.94  370.53
  -6   6  -7 3084.81  137.75
   6  -6   7 3353.24  153.17
  -6   6  -7 3358.05  202.22
  -6  -6  -7 3337.30  427.48
  -6  -6  -7 3639.61  207.59
  -6  -6  -8 2144.32  182.50
  -6   6  -8 1806.42  161.13
   6  -6   8 2443.84  129.97
  -6   6  -8 2632.77  638.10
  -6  -6  -8 2529.62  171.11
  -6   6  -8 2400.84  203.10
  -6  -6  -9 2245.63  127.31
   6  -6   9 2210.07  199.39
  -6   6  -9 2439.82  208.04
  -6  -6  -9 2235.60  335.62
  -6  -6  -9 2308.64  164.89
  -6   6  -9 2600.61  386.01
  -6  -6 -10 1689.05  351.69
   6  -6  10 1754.23  268.62
  -6   6 -10 1976.38  420.63
  -6  -6 -10 1820.80  174.74
  -6  -6 -10 1945.66  149.59
  -6   6 -10 2010.12  171.90
  -6  -6 -11  376.87   82.29
   6  -6  11  137.26   44.67
  -6   6 -11  210.23  158.46
  -6  -6 -11  239.33   57.99
  -6   6 -11  228.90  102.82
  -6  -6 -12 2138.22  383.89
   6  -6  12 2060.80  210.05
  -6   6 -12 2484.53  528.92
  -6  -6 -12 2305.78  396.98
  -6   6 -12 2235.06  176.49
  -6  -6 -13   84.91   34.62
   6  -6  13   30.97   20.91
  -6   6 -13   31.49   33.72
  -6  -6 -13   47.23   37.80
  -6   6 -13   41.22   31.79
  -6  -6 -14   64.03   41.78
  -6   6 -14   -6.55   24.35
  -6  -6 -14   13.70    9.79
  -6   6 -14   79.98   36.31
  -6   6 -15  227.40   68.61
  -6  -6 -15  238.52   31.71
  -6   6 -15  417.30   94.43
  -6  -6 -15  138.42   33.41
  -6   6 -15  139.06   84.88
  -6   6 -16  131.87   55.28
  -6  -6 -16   94.27   39.25
  -6  -6 -16  241.93   74.60
  -6   6 -16  124.15   49.50
  -6  -6 -17   76.94   47.73
  -6   6 -17  179.03   84.61
  -6  -6 -17   55.26   74.44
  -6  -6 -17   96.74   42.80
  -6   6 -17  105.32   42.67
  -6  -6 -18    0.46   23.05
  -6   6 -18   33.61   39.72
  -6  -6 -18   20.88   44.35
  -6  -6 -18    3.74   16.58
  -6   6 -18   11.45   10.21
  -6  -6 -19   30.69   56.08
   6  -8 -24  139.90   69.17
  -6  -8  24   79.07   60.42
   6  -8 -23   59.15   46.01
  -6  -8  23  110.21   47.15
   6  -8 -22   94.93   78.80
  -6  -8  22   36.75   67.31
   6  -8 -21  122.63   95.03
  -6  -8  21  189.98  158.90
   6  -8 -20  376.14   75.68
  -6  -8  20  560.00  175.11
   6  -8 -19  845.88  243.99
  -6  -8  19 1080.62  284.71
   6  -8 -18   73.63   52.96
  -6  -8  18   23.87   80.68
   6  -8 -17  188.93   68.07
  -6  -8  17  106.09  141.57
   6  -8 -16  593.66  130.01
  -6  -8  16  536.51  116.06
   6  -8 -15  196.03   64.98
  -6  -8  15  103.41   89.31
   6  -8 -14  217.71  122.16
  -6  -8  14  152.23   62.81
   6  -8 -13  915.27  185.71
  -6  -8  13  787.96  183.74
   6  -8 -12 1212.19  276.70
  -6  -8  12  995.48  265.31
   6  -8 -11 1172.45  260.51
  -6  -8  11 1177.73  170.61
   6  -8  -9  630.13  113.80
  -6  -8   9  730.16  135.61
   6  -8  -8  542.29  132.29
  -6  -8   8  598.51   95.74
   6  -8  -7  568.88  132.85
  -6  -8   7  621.57  120.00
   6  -8  -6 7056.69  342.75
  -6  -8   6 7472.86  496.27
   6  -8  -5  710.09  244.99
  -6  -8   5  685.10  226.22
   6  -8  -4 3585.93  198.62
  -6  -8   4 3756.92  310.44
   6   8  -4 3633.66  190.54
   6  -8  -3   55.43   21.85
  -6  -8   3  112.83   51.65
   6  -8  -3   23.80   21.62
   6   8  -3   31.83   26.15
  -6  -8   3   44.27   29.45
  -6   8   2 2175.09  161.09
   6  -8  -2 2262.59  175.55
  -6  -8   2 2493.46  130.66
   6   8  -2 2555.52   91.32
   6  -8  -2 2301.57  111.16
  -6  -8   2 2558.41  186.96
  -6   8   2 2379.29  126.56
  -6   8   1  995.87   77.37
  -6  -8   1 1403.43  195.63
   6  -8  -1 1248.45   97.85
   6  -8  -1  989.42   66.35
   6   8  -1 1127.24  128.83
  -6   8   1 1252.03   87.38
  -6  -8   1 1193.12   94.45
  -6   8   0 2017.51  130.71
  -6  -8   0 2440.34  267.34
   6  -8   0 2198.78  123.72
   6  -8   0 1942.12   96.41
  -6  -8   0 2337.40  101.12
  -6   8   0 2104.26  106.01
  -6   8   0 2055.10  119.26
  -6  -8   0 1949.02   84.58
  -6   8  -1 1479.99  290.87
   6  -8   1 2129.54  140.19
  -6  -8  -1 1876.85  120.15
  -6   8  -1 1709.72  101.59
  -6  -8  -1 1733.58  219.00
   6   8   1 1809.90  275.77
  -6   8  -1 1769.20  134.37
  -6   8  -2 4923.21  262.10
  -6  -8  -2 5728.51  336.85
   6  -8   2 5335.63  158.71
  -6  -8  -2 5260.00  154.68
  -6   8  -2 5213.53  208.71
   6   8   2 5420.10  181.67
  -6   8  -2 5642.56  246.35
  -6   8  -3 3131.42  132.68
  -6  -8  -3 3630.63  217.82
   6  -8   3 3487.37  156.76
  -6  -8  -3 3498.21  257.60
  -6   8  -3 4212.39  430.64
   6   8   3 3435.77  193.51
  -6   8  -3 3578.34  172.95
  -6   8  -4 4704.30  331.96
  -6  -8  -4 5970.58  198.21
   6  -8   4 5179.08  309.51
  -6   8  -4 5193.47  363.87
  -6  -8  -4 5259.75  321.09
  -6  -8  -5  214.93   56.05
  -6   8  -5  124.33   34.75
   6  -8   5  304.92   94.23
  -6   8  -5  298.84   68.09
  -6  -8  -5  276.10   59.35
  -6  -8  -6   27.26   24.69
  -6   8  -6   23.13   15.92
   6  -8   6   38.59   22.28
  -6  -8  -6  100.66   43.75
  -6   8  -6  890.24  293.87
  -6  -8  -7   86.04   40.35
   6  -8   7   92.53   63.78
  -6  -8  -7  197.69   76.01
  -6   8  -7   72.21   50.81
  -6   8  -7   99.70   43.11
  -6  -8  -8 4117.94  614.75
   6  -8   8 4070.23  275.05
  -6   8  -8 4283.44  300.30
  -6   8  -8 4170.76  297.97
  -6  -8  -9 2246.42  156.41
   6  -8   9 2011.31  119.91
  -6   8  -9 2041.49  323.69
  -6  -8  -9 1819.98  439.99
  -6   8  -9 1879.87  462.74
  -6  -8 -10   63.60   47.40
   6  -8  10   35.40   16.87
  -6  -8 -10   31.32   22.15
  -6   8 -10   -8.56   42.86
  -6  -8 -10   81.20   45.66
  -6   8 -10   94.97   42.80
  -6  -8 -11 3128.22  535.39
   6  -8  11 3091.88  227.00
  -6  -8 -11 3260.22  215.50
  -6   8 -11 3589.63  233.28
  -6  -8 -11 3259.37  352.52
  -6   8 -11 3244.21  390.40
  -6  -8 -12   33.37   27.43
   6  -8  12  157.39   46.18
  -6   8 -12  103.83   60.90
  -6  -8 -12   84.61   63.59
  -6  -8 -12  187.85   54.40
  -6   8 -12   57.45   63.15
  -6  -8 -13   76.55   24.06
  -6   8 -13    2.93   29.15
  -6   8 -13   73.27   31.03
  -6  -8 -14   95.90   92.41
   6  -8  14   17.74   22.95
  -6   8 -14   36.48   57.08
  -6  -8 -14   31.24   23.53
  -6   8 -14   29.52   39.80
  -6  -8 -15   50.54   24.26
  -6   8 -15   44.67   37.71
  -6  -8 -15   71.61   43.41
  -6  -8 -15   19.40   21.53
  -6   8 -15   37.08   16.58
  -6  -8 -16   23.66   40.46
  -6   8 -16   41.85   33.68
  -6  -8 -16   14.16   39.38
  -6  -8 -16   30.57   42.02
  -6   8 -16   41.26   23.45
  -6  -8 -17   31.86   29.63
  -6   8 -17   28.84   36.16
  -6  -8 -17   82.04   48.29
  -6  -8 -17   37.95   30.68
  -6   8 -17   10.69   35.24
  -6  -8 -18   10.61   20.81
  -6   8 -18   92.98   46.98
  -6  -8 -18  110.15   58.80
  -6   8 -18   42.50   37.53
   6 -10 -24   64.65   50.93
  -6 -10  24   57.89   39.65
   6 -10 -23  284.06  121.71
  -6 -10  23  366.46   96.57
   6 -10 -22   50.99   45.46
  -6 -10  22   15.27   47.92
   6 -10 -21   72.11   53.86
  -6 -10  21   64.73   64.60
   6 -10 -20  253.06  112.05
  -6 -10  20   85.42   44.03
   6 -10 -19  327.13  109.88
  -6 -10  19  409.02  136.28
   6 -10 -18  104.19   61.08
  -6 -10  18  111.92   53.19
   6 -10 -17 2150.02  444.64
  -6 -10  17 2368.22  576.67
   6 -10 -16  215.77  105.76
  -6 -10  16  234.53   74.30
   6 -10 -15   86.94   35.99
  -6 -10  15   50.45   40.80
   6 -10 -14 2165.05  498.99
  -6 -10  14 1918.89  502.26
   6 -10 -13  593.18  141.54
  -6 -10  13  815.89  193.69
   6 -10 -12   83.07   71.27
  -6 -10  12    8.20   28.91
   6 -10 -11 1128.83  211.21
  -6 -10  11 1122.06  286.77
   6 -10 -10  709.05  136.68
  -6 -10  10  595.60  230.31
   6 -10  -9 2051.00  463.88
  -6 -10   9 1832.17  150.50
  -6 -10   8  356.20  132.09
   6 -10  -7 3398.11  246.71
   6 -10  -6  374.79  124.23
  -6 -10   6  426.87  154.82
   6 -10  -5  316.57  117.78
  -6 -10   5  342.43   87.40
   6  10  -5  158.50   39.08
   6 -10  -4 1882.00  133.54
  -6 -10   4 1986.35  251.96
   6 -10  -4 1595.96  202.99
   6  10  -4 1653.86   83.19
  -6 -10   4 1839.57  118.64
   6 -10  -3  537.88  151.68
  -6 -10   3  409.05   71.60
   6  10  -3  289.72   57.73
   6 -10  -3  568.50   50.23
  -6  10   3  386.17  116.20
  -6 -10   3  445.12  101.22
   6 -10  -2  143.44   49.40
  -6 -10   2  112.43   51.20
   6 -10  -2  116.66   40.09
  -6  10   2  178.88   58.04
  -6 -10   2  198.71   25.42
   6 -10  -1  957.14  199.20
  -6 -10   1 1140.51  234.93
   6 -10  -1  568.67  182.28
  -6  10   1 1010.95  107.98
  -6 -10   0 2165.94  198.12
   6 -10   0 2267.63  149.80
  -6 -10   0 2179.80   96.91
  -6  10   0 2531.05  135.95
  -6 -10  -1  603.76  128.23
   6 -10   1  359.88   88.71
  -6 -10  -1  399.02  118.20
  -6  10  -1  559.56   93.70
   6  10   1  294.37   78.09
  -6  10  -1  440.87  101.62
   6 -10   2  103.68   42.31
  -6 -10  -2   55.43   34.93
  -6  10  -2    7.80   18.97
  -6 -10  -2   34.22   29.72
   6  10   2   25.66   13.77
  -6  10  -2   59.38   36.85
  -6 -10  -3 1936.55  379.72
   6 -10   3 1787.48  180.37
  -6 -10  -3 1831.53  272.30
  -6  10  -3 1947.64  142.52
   6  10   3 1547.96  116.22
  -6  10  -3 1870.72  135.90
  -6 -10  -4 1433.62  386.30
   6 -10   4 1267.30  214.24
  -6 -10  -4 1238.91  306.51
  -6  10  -4 1281.63  342.40
  -6 -10  -5  867.21  218.46
   6 -10   5  814.55  231.90
  -6 -10  -5  884.92  232.14
  -6  10  -5  826.73  235.58
  -6 -10  -6 3260.73  238.45
   6 -10   6 3041.16  148.62
  -6  10  -6 2753.47  247.40
  -6 -10  -6 2873.11  138.14
  -6 -10  -7  593.60  141.58
   6 -10   7  652.18  216.41
  -6  10  -7  555.97  183.30
  -6 -10  -7  571.16  134.45
  -6 -10  -8 1103.17  217.81
   6 -10   8 1031.16  266.06
  -6  10  -8 1006.30  283.68
  -6  10  -8 1148.39  310.97
  -6 -10  -9 2394.19  412.65
   6 -10   9 2228.04  239.82
  -6  10  -9 2373.52  340.55
  -6 -10  -9 2340.17  256.75
  -6  10  -9 2442.80  198.71
  -6 -10 -10   72.10   74.85
   6 -10  10   17.16   47.52
  -6  10 -10   55.05   52.38
  -6 -10 -10  166.91   48.96
  -6  10 -10   81.22   54.96
  -6 -10 -11  657.68  126.20
  -6  10 -11  532.09  103.62
  -6 -10 -11  670.18  195.89
  -6 -10 -11  596.11  137.54
  -6  10 -11  588.94  127.23
  -6 -10 -12 1398.67  197.44
   6 -10  12 1162.64  138.46
  -6  10 -12 1240.37  175.97
  -6 -10 -12  882.14  331.02
  -6 -10 -12 1052.50  265.53
  -6  10 -12  865.92  265.87
  -6 -10 -13   71.26   41.50
   6 -10  13   74.47   23.04
  -6  10 -13  145.57   70.39
  -6 -10 -13  100.14   41.38
  -6 -10 -13  105.77   42.06
  -6  10 -13   79.31   50.37
  -6 -10 -14   35.36   42.39
   6 -10  14   48.62   37.92
  -6  10 -14   52.11   30.70
  -6 -10 -14   45.52   26.64
  -6 -10 -14   47.64   25.61
  -6  10 -14   14.81   22.48
  -6 -10 -15  109.67   62.87
  -6 -10 -15  118.47   35.52
  -6  10 -15   61.17   50.12
  -6 -10 -15   33.46   48.10
  -6  10 -15   48.59   52.10
  -6 -10 -16   19.52   35.81
  -6  10 -16   18.60   14.08
  -6 -10 -16   74.64   54.71
  -6 -10 -16   13.84   30.33
  -6  10 -16   65.77   56.57
  -6 -10 -17   22.42   41.92
  -6 -10 -17  107.29   33.15
  -6  10 -17   29.72   49.43
  -6 -10 -17   47.80   25.88
  -6  10 -17   75.27   48.58
  -6  10 -18  105.10   34.27
  -6  10 -18   65.34   31.78
   6 -12 -23  101.81   73.78
  -6 -12  23   45.47   57.55
   6 -12 -22  113.02   72.05
  -6 -12  22  216.13   96.50
   6 -12 -21   21.89   42.75
  -6 -12  21   61.35   44.24
   6 -12 -20   67.14   52.74
  -6 -12  20   32.27   60.40
   6 -12 -19  279.66  169.66
  -6 -12  19  166.09   55.74
   6 -12 -18   17.64   47.12
  -6 -12  18  108.20   58.24
   6 -12 -17 1289.50  297.13
  -6 -12  17 1504.44  380.04
   6 -12 -16 1380.01  312.18
  -6 -12  16 1758.42  351.88
   6 -12 -15  149.98   76.28
  -6 -12  15  194.54   84.28
   6 -12 -14 2368.74  241.35
  -6 -12  14 2547.91  432.50
   6 -12 -13 2126.69  464.55
  -6 -12  13 2446.83  492.50
   6 -12 -12  400.63   73.33
  -6 -12  12  265.01   83.33
   6 -12 -11  145.08   88.59
  -6 -12  11  143.99   52.00
   6 -12 -10  146.52   49.83
  -6 -12  10  256.30   82.61
   6 -12  -9   37.90   44.53
  -6 -12   9   54.96   68.35
   6 -12  -8  382.44  248.71
  -6 -12   8  434.45  116.50
   6 -12  -713040.10  624.36
  -6 -12   712672.20  614.81
   6 -12  -6 1664.42  454.27
  -6 -12   6 1946.68  325.23
   6  12  -6 1429.99   81.93
  -6 -12   5 4329.10  241.24
  -6 -12   4 1439.69  125.91
   6  12  -4 1275.16   76.11
  -6  12   4 1288.04  181.51
   6 -12  -3  452.76  133.39
  -6 -12   3  557.73  134.41
   6 -12  -3  391.37  129.63
  -6  12   3  543.98  108.47
  -6 -12   2 1169.70  279.39
   6 -12  -2 1156.47  266.40
   6 -12  -2  912.96   72.48
  -6  12   2 1006.78   91.21
  -6 -12   1 3010.70  200.23
   6 -12  -1 2882.45  212.14
  -6  12   1 2957.83  277.69
  -6 -12   0   37.31   47.32
   6 -12   0   42.71   35.53
  -6  12   0   25.15   28.21
   6 -12   1  954.32  109.66
  -6 -12  -1 1024.66  321.29
  -6 -12  -1  931.67  119.88
  -6  12  -1 1025.94  249.37
   6 -12   2   44.25   35.07
  -6 -12  -2   72.18   63.36
  -6 -12  -2   22.30   26.90
  -6  12  -2   90.64   43.28
   6  12   2    4.27    8.61
  -6  12  -2   -6.20   19.14
  -6 -12  -3 8267.54  425.59
   6 -12   3 8150.31  403.87
  -6  12  -3 7828.85  382.65
  -6 -12  -3 8004.24  372.94
   6  12   3 8044.40  359.10
  -6 -12  -4 1122.63  382.24
   6 -12   4 1158.70  144.16
  -6 -12  -4 1274.61  125.38
  -6  12  -4 1295.17  197.96
  -6 -12  -5 6521.59  419.35
   6 -12   5 6378.20  330.57
  -6 -12  -5 6184.70  304.70
  -6  12  -5 6435.80  375.16
  -6 -12  -6  494.45  134.02
   6 -12   6  237.44  164.17
  -6 -12  -6  290.60   86.85
  -6  12  -6  443.99  137.68
  -6 -12  -7  379.32   68.49
  -6  12  -7  237.54   93.70
  -6 -12  -7  244.80   60.47
  -6 -12  -8   95.32   59.23
  -6  12  -8   21.55   48.15
  -6 -12  -9 2373.89  514.19
   6 -12   9 2332.35  136.99
  -6  12  -9 2237.69  418.87
  -6 -12  -9 2493.97  341.38
  -6 -12 -10  782.74  140.04
   6 -12  10 1311.57  248.86
  -6 -12 -10  698.48  224.45
  -6  12 -10  831.62  139.57
  -6  12 -10  518.25  109.40
  -6 -12 -11 2321.79  506.14
   6 -12  11 2536.54  181.44
  -6 -12 -11 1895.62  581.57
  -6  12 -11 2785.46  467.76
  -6  12 -11 2417.11  599.41
  -6 -12 -12   -0.43   34.09
   6 -12  12   28.84   41.55
  -6  12 -12   65.78   51.74
  -6  12 -12   21.48   60.25
  -6 -12 -13   57.77   32.97
   6 -12  13   43.01   19.13
  -6  12 -13  123.83   44.01
  -6 -12 -13   94.53   38.84
  -6 -12 -13   48.14   48.38
  -6  12 -13    0.21   23.92
  -6 -12 -14    2.45   27.06
  -6  12 -14   65.09   34.89
  -6 -12 -14   26.58   30.48
  -6 -12 -14   30.03   12.66
  -6  12 -14   65.28   44.63
  -6 -12 -15  369.42   63.67
  -6  12 -15  335.87   63.95
  -6 -12 -15  333.70  105.94
  -6 -12 -15  332.78  100.65
  -6  12 -15  319.03  112.77
  -6 -12 -16   26.60   17.80
  -6  12 -16   71.10   37.33
  -6 -12 -16   16.05   20.88
  -6 -12 -16   35.24   16.88
  -6  12 -16   43.13   34.94
  -6 -12 -17   74.98   50.24
  -6  12 -17   15.94   19.11
  -6 -12 -17   16.93   18.59
  -6 -12 -17   46.85   27.35
  -6  12 -17   48.68   35.54
   6 -14 -21   73.98   60.95
  -6 -14  21   59.45   44.20
   6 -14 -20  352.79  113.82
  -6 -14  20  142.51   82.83
   6 -14 -19   47.71   39.29
  -6 -14  19   17.45   33.62
   6 -14 -18  821.74  241.23
  -6 -14  18  998.04  243.06
   6 -14 -17  195.00  117.78
  -6 -14  17  352.46   92.54
   6 -14 -16 2233.68  492.50
  -6 -14  16 2070.51  622.92
   6 -14 -15   40.85   76.40
  -6 -14  15   83.11   53.59
   6 -14 -14  851.00  128.38
  -6 -14  14  719.51  203.05
   6 -14 -13   55.60   68.32
  -6 -14  13   23.29   45.16
   6 -14 -12  257.70  135.29
  -6 -14  12   49.02   70.48
   6 -14 -11  697.47  191.14
  -6 -14  11  919.49  233.85
   6 -14 -10 4241.58  305.51
  -6 -14  10 4449.75  539.45
   6 -14  -9  106.85   87.75
  -6 -14   9   80.75   73.40
   6 -14  -8 3112.91  613.71
  -6 -14   8 3231.97  237.16
   6 -14  -7  135.34   97.66
  -6 -14   7  171.79   73.86
   6 -14  -6   63.05   46.92
  -6 -14   6   45.44   26.71
   6 -14  -5  162.20   52.48
  -6 -14   5  104.95   59.44
  -6  14   5  142.16   34.48
   6 -14  -4 3514.13  248.46
  -6 -14   4 4028.50  286.57
  -6  14   4 3596.98  325.99
   6 -14  -3  101.63   51.22
  -6 -14   3   22.36   45.49
  -6  14   3   77.59   36.09
   6 -14  -2 6969.05  363.77
  -6 -14   2 7099.65  401.16
  -6  14   2 6412.11  329.57
  -6 -14   1 3416.90  276.10
   6 -14  -1 3259.08  251.68
  -6  14   1 2972.55  309.95
  -6 -14   0 5683.54  393.15
   6 -14   0 5202.67  296.38
  -6  14   0 4907.34  383.26
   6 -14   1  246.01   83.28
  -6 -14  -1   92.92   96.77
  -6  14  -1   28.85   30.03
   6 -14   2 6698.44  354.21
  -6 -14  -2 6869.16  384.56
  -6 -14  -2 5944.28  292.44
  -6 -14  -3   48.00   30.27
   6 -14   3  142.13   60.35
  -6 -14  -4  975.54  306.87
   6 -14   4  793.21  198.14
  -6  14  -4  709.08  120.03
  -6 -14  -4  731.12   82.51
  -6 -14  -5  506.24  112.67
   6 -14   5  447.99  186.10
  -6 -14  -5  450.33   98.03
  -6  14  -5  506.56  137.59
  -6 -14  -6 2346.13  383.54
   6 -14   6 2778.14  156.64
  -6 -14  -6 2189.02  222.44
  -6  14  -6 2457.45  242.92
  -6 -14  -7   90.38   65.40
   6 -14   7    3.71   21.49
  -6 -14  -7    0.78   19.73
  -6  14  -7   12.14   40.63
  -6 -14  -8 1533.15  140.59
   6 -14   8 1434.96  394.70
  -6  14  -8 1402.31  352.94
  -6 -14  -9  313.43  120.43
   6 -14   9  348.44  102.91
  -6 -14  -9  368.07  109.19
  -6  14  -9  303.54   80.84
   6 -14  10   13.98   14.80
  -6  14 -10   36.71   59.94
  -6 -14 -10   41.05   23.17
  -6 -14 -11  446.31  205.34
   6 -14  11  289.48  164.28
  -6  14 -11  409.65  113.33
  -6 -14 -11  338.96   96.44
  -6  14 -11  413.54  131.41
  -6 -14 -12 1748.49  387.24
   6 -14  12 2106.40  353.23
  -6  14 -12 2112.84  345.04
  -6 -14 -12 2205.95  281.79
  -6  14 -12 1939.37  528.21
  -6 -14 -13   20.57   28.98
  -6  14 -13   28.67   26.85
  -6 -14 -13   92.35   38.72
  -6  14 -13   51.26   37.23
  -6 -14 -14  277.39   95.84
  -6 -14 -14  318.27  113.41
  -6  14 -14  352.89  106.21
  -6 -14 -14  552.92  146.10
  -6  14 -14  449.90  171.47
  -6 -14 -15   17.07   27.78
  -6  14 -15   44.36   62.15
  -6 -14 -15   56.56   30.99
  -6 -14 -15   37.10   22.41
  -6  14 -15   45.95   17.71
   6 -16 -20   78.19   48.28
  -6 -16  20   52.47   48.08
   6 -16 -19  157.28   86.23
  -6 -16  19  257.87   88.71
   6 -16 -18  283.65   69.05
  -6 -16  18  164.61   56.69
   6 -16 -17  129.55   87.09
  -6 -16  17  273.57  138.84
   6 -16 -16  360.98  103.39
  -6 -16  16  121.09   63.08
   6 -16 -15   49.74   34.63
  -6 -16  15   45.66   47.34
   6 -16 -14 1549.95  428.02
  -6 -16  14 1533.83  281.65
   6 -16 -13  113.96   66.30
  -6 -16  13  233.92   56.06
  -6 -16  12  833.03  226.43
   6 -16 -11 1087.40  270.16
  -6 -16  11  829.91  182.88
   6 -16 -10   19.60   53.96
  -6 -16  10   45.63   43.24
   6 -16  -9   27.51   43.13
  -6 -16   9   83.93   37.64
   6 -16  -8   96.90   29.30
  -6 -16   8   56.49   78.28
   6 -16  -7  595.98  162.28
  -6 -16   7  565.32  141.31
   6 -16  -6  108.15   44.32
  -6 -16   6  259.68   65.05
  -6  16   6  149.26   56.87
  -6 -16   5   26.17   51.69
  -6  16   5   46.12   20.57
   6 -16  -4 3273.64  306.93
  -6 -16   4 3528.30  531.67
  -6  16   4 2681.23  269.33
   6 -16  -3   85.95   65.76
  -6 -16   3   51.62   60.06
  -6  16   3   17.06   17.09
   6 -16  -2 3177.44  235.16
  -6 -16   2 2682.46  564.04
  -6  16   2 2441.38  187.42
  -6 -16   1 2700.99  187.89
   6 -16  -1 2310.52  523.17
  -6  16   1 1587.15  358.79
  -6 -16   0  238.32   99.30
   6 -16   0  187.21   69.81
  -6  16   0  112.77   33.72
   6 -16   1 1575.43  420.05
  -6 -16  -1 2205.68  295.14
  -6 -16  -2  576.87  155.34
   6 -16   2  400.68  147.17
  -6 -16  -3  124.81   67.27
   6 -16   3   33.25   28.12
   6 -16   4 4017.60  202.01
  -6 -16  -5  413.61  138.99
   6 -16   5  368.47  167.30
  -6  16  -5  568.73  135.54
  -6 -16  -6 3178.95  214.47
   6 -16   6 2606.21  241.10
  -6  16  -6 2736.76  204.67
  -6 -16  -7   87.22   69.51
   6 -16   7   26.92   38.85
  -6  16  -7   44.95   30.09
  -6 -16  -8  583.20  262.09
   6 -16   8  607.65  214.25
  -6  16  -8  570.83  111.60
  -6 -16  -9   81.07   35.61
   6 -16   9    9.96   16.05
  -6  16  -9   62.77   48.09
  -6 -16 -10  207.01   61.22
   6 -16  10  114.05   42.92
  -6  16 -10  119.90   33.24
  -6 -16 -11  662.56  179.26
   6 -16  11  343.31  125.97
  -6  16 -11  415.96   97.11
  -6 -16 -12  103.71   79.90
   6 -16  12   87.24   62.44
  -6  16 -12   84.78   66.11
  -6  16 -12  138.01   59.40
  -6 -16 -13   75.70   42.66
  -6  16 -13  121.86   45.88
  -6  16 -13   39.55   25.90
  -6 -16 -14   28.58   40.08
  -6  16 -14   65.38   32.89
  -6  16 -14   21.11   31.29
   6 -18 -18   48.47   66.41
  -6 -18  18   32.50   35.70
   6 -18 -17   12.47   50.80
  -6 -18  17   92.40   45.49
   6 -18 -16   68.02   46.03
  -6 -18  16   17.90   37.32
   6 -18 -15   25.54   37.57
  -6 -18  15   84.63   39.52
   6 -18 -14  100.71   37.28
  -6 -18  14   47.99   46.72
   6 -18 -13  296.24   97.69
  -6 -18  13  401.47  114.09
   6 -18 -12   59.86   63.22
  -6 -18  12   23.04   57.39
   6 -18 -11  671.44  180.43
  -6 -18  11  936.48  259.73
   6 -18 -10  139.13   96.39
  -6 -18  10  240.89   89.98
   6 -18  -9  507.73  199.03
  -6 -18   9  428.49  109.56
   6 -18  -8   30.38   55.85
   6 -18  -7  484.22  114.75
  -6 -18   7  432.08   95.08
   6 -18  -6  432.61  125.53
  -6 -18   6  307.34  102.07
   6 -18  -5  374.85   96.09
  -6 -18   5   52.52   46.29
   6 -18  -4   32.27   23.42
  -6 -18   4  140.57   73.77
   6 -18  -3  512.22  122.73
  -6 -18   3  300.19   76.84
   6 -18  -2   68.51   71.96
  -6 -18   2   19.75   41.73
  -6 -18   1  399.97  110.88
   6 -18  -1  537.38  161.42
  -6 -18   0  184.13  100.11
   6 -18   0  166.01  105.97
   6 -18   1  119.29   53.43
  -6 -18  -1  151.34   70.47
  -6 -18  -2 1366.79  428.52
   6 -18   2 1133.75  369.51
  -6 -18  -3  535.25  123.82
   6 -18   3  293.75   81.05
  -6 -18  -4  253.89   70.38
   6 -18   4  128.03   44.38
  -6 -18  -5  740.01  164.90
   6 -18   5  622.47  158.76
  -6 -18  -6   67.71   44.34
   6 -18   6   19.19   20.99
  -6 -18  -7  283.48  133.56
   6 -18   7  307.00  174.87
  -6 -18  -8   69.48   51.99
   6 -18   8   32.87   32.56
  -6 -18  -9  739.62  175.84
   6 -18   9  562.55  187.07
  -6 -18 -10   79.98   33.61
   6 -18  10   -2.25   17.31
  -6 -18 -11   54.57   42.72
   6 -18  11   44.11   46.61
  -6 -18 -12   38.04   36.09
   6 -20 -15    7.34   29.95
  -6 -20  15   15.10   36.17
   6 -20 -14    9.26   39.19
  -6 -20  14   26.51   75.68
   6 -20 -13    3.66   35.81
  -6 -20  13   54.03   69.41
   6 -20 -12   52.89   45.29
  -6 -20  12   -9.48   32.59
   6 -20 -11  440.19  145.49
  -6 -20  11  409.62  164.12
   6 -20 -10  208.36   63.37
  -6 -20  10   46.44   79.97
   6 -20  -9   42.47   52.34
  -6 -20   9  123.07   58.61
  -6 -20   8   14.75   45.31
   6 -20  -7   46.34   35.47
  -6 -20   7   43.94   71.65
   6 -20  -6  104.26   69.21
  -6 -20   6  112.99   75.51
   6 -20  -5  117.54   50.34
  -6 -20   5   47.87   46.61
   6 -20  -4  785.76  308.63
  -6 -20   4 1093.30  168.76
   6 -20  -3  497.63  121.00
  -6 -20   3  455.72  227.53
   6 -20  -2   33.92   36.34
  -6 -20   2   65.75   44.44
   6 -20  -1   67.03   61.15
  -6 -20   1   87.43   43.07
   6 -20   0  141.98   73.98
  -6 -20   0  163.74   64.07
  -6 -20  -1  679.30  191.54
   6 -20   1  732.64  237.06
  -6 -20  -2   88.99   49.92
   6 -20   2   -3.81   29.59
  -6 -20  -3  151.76   82.60
   6 -20   3  105.80   56.78
  -6 -20  -4   64.44   61.32
   6 -20   4    2.70   21.77
  -6 -20  -5   10.54   29.15
   6 -20   5   28.42   41.10
  -6 -20  -6   40.39   39.81
   6 -20   6   33.46   18.29
  -6 -20  -7   46.92   34.27
   6 -20   7   20.71   22.45
  -6 -20  -8   31.39   49.31
   6 -20   8   20.87   16.46
  -6 -20  -9   31.62   60.50
   6 -20   9    8.01   15.54
   6 -22 -12   31.62   52.39
  -6 -22  12   18.54   49.98
   6 -22 -11  161.74   61.67
  -6 -22  11   43.36   50.67
   6 -22 -10   99.30   44.77
  -6 -22  10   82.88   60.96
   6 -22  -9  123.48   85.46
  -6 -22   9   73.33   58.66
   6 -22  -8   44.47   60.09
  -6 -22   8   48.01   35.61
   6 -22  -7  487.10  189.43
  -6 -22   7  397.60  201.46
   6 -22  -6  155.63  101.93
  -6 -22   6   95.52   84.91
   6 -22  -5   84.77   40.61
  -6 -22   5   72.34   57.64
   6 -22  -4   72.29   72.88
  -6 -22   4   65.31   63.48
   6 -22  -3   48.53   30.08
  -6 -22   3   70.58   44.08
   6 -22  -2   82.59   43.76
  -6 -22   2   63.36   48.80
   6 -22  -1  298.79   82.26
  -6 -22   1  255.39   92.75
   6 -22   0   32.71   31.80
  -6 -22   0   44.89   45.57
  -6 -22  -1   23.96   67.33
   6 -22   1   36.57   42.54
  -6 -22  -2   79.48   67.21
   6 -22   2   76.50   33.33
  -6 -22  -3   20.10   34.50
   6 -22   3   42.71   58.82
  -6 -22  -4   37.13   14.06
   6 -22   4   39.07   34.57
  -6 -22  -5   46.70   47.15
   6 -22   5   39.66   38.86
  -6 -22  -6    5.81   41.56
   6 -22   6   24.30   33.10
   7   1 -26   35.16   31.38
   7  -1 -26   38.64   42.41
   7   1 -25   70.54   54.39
   7  -1 -25   62.86   57.80
   7  -1 -24   55.57   64.49
   7   1 -24   59.68   62.18
   7   1 -23  285.23   99.29
   7  -1 -23  219.94   65.20
   7  -1 -22   70.98   53.86
   7   1 -22  -19.27   47.01
   7   1 -21 1974.73  299.16
   7  -1 -21 2109.22  362.59
   7  -1 -20  410.37  110.98
   7   1 -20  622.39  109.76
   7   1 -19  269.84  163.75
   7  -1 -19  156.79   83.76
   7  -1 -18  518.67  136.92
  -7  -1  18  442.16   69.32
   7  -1 -17  574.77  117.97
  -7  -1  17  312.43  171.04
   7  -1 -16  854.11  136.35
  -7  -1  16  958.64  189.24
   7  -1 -15  322.23   74.87
  -7  -1  15  795.26  102.71
   7  -1 -14 6657.50  707.56
  -7  -1  14 5529.02  410.30
  -7  -1  12  504.55  117.87
  -7  -1  12  461.17   48.05
  -7  -1  11 8393.37  289.84
  -7   1  11 8008.29  335.47
  -7  -1  11 8289.22  191.63
   7   1 -11 8445.51  190.32
  -7  -1  10  625.42  133.98
  -7   1  10  825.50  181.82
  -7  -1  10  520.58   62.34
   7   1 -10  522.05   70.96
  -7  -1   9  927.51  160.21
  -7   1   9 1047.01  219.00
  -7  -1   9  794.87  139.82
  -7   1   9  825.62   94.50
   7   1  -9  661.13   86.57
   7   1  -8  702.06  179.23
  -7  -1   8  712.90  122.91
   7  -1  -8  627.09  137.97
  -7   1   8  746.07  153.41
  -7  -1   8  711.37  137.62
  -7   1   8  812.84  128.64
   7  -1  -8  671.74  115.50
   7   1  -8  637.26  138.19
   7   1  -7 3187.70  171.45
  -7  -1   7 3357.26  283.40
   7  -1  -7 3384.69  215.34
  -7   1   7 3602.77  195.27
  -7  -1   7 3643.25  180.81
  -7   1   7 3788.98  188.79
   7  -1  -7 3949.63  197.25
   7   1  -7 3453.02  252.94
  -7   1   7 3779.31  239.41
   7   1  -610420.00  328.20
  -7  -1   611118.60  353.92
   7  -1  -611054.50  345.01
  -7   1   611288.60  424.00
  -7  -1   611126.00  342.71
   7  -1  -610714.70  337.68
  -7   1   611076.00  338.91
   7  -1  -611755.20  400.15
  -7   1   611349.90  341.75
   7   1  -611257.30  358.50
   7   1  -5  151.88   56.10
  -7  -1   5  257.47   59.31
   7  -1  -5  131.42   40.09
  -7   1   5  213.06   77.65
  -7  -1   5  216.66   33.76
   7  -1  -5  170.69   41.44
  -7   1   5  119.83   55.14
   7  -1  -5   99.25   79.31
   7   1  -5  164.32   35.40
  -7   1   5  195.85   38.10
   7   1  -410909.20  277.60
   7  -1  -410841.50  269.74
  -7  -1   411625.20  220.98
  -7   1   411120.60  182.57
   7  -1  -410726.90  281.27
  -7  -1   411030.70  294.56
  -7   1   411009.70  292.29
   7  -1  -411290.30  257.86
   7   1  -411234.40  200.56
  -7   1   411308.60  203.04
   7  -1  -3 1147.61   88.17
   7   1  -3 1112.01   58.17
  -7  -1   3 1031.77  143.29
   7  -1  -3 1102.70   77.41
   7  -1  -3  937.57   69.28
   7   1  -3 1073.76   88.66
   7  -1  -3 1001.73   71.05
  -7  -1   3 1161.77   84.93
  -7   1   3 1135.41   97.54
   7  -1  -3 1027.40   67.36
  -7   1   3 1023.82   74.74
   7   1  -3 1050.53   76.36
   7  -1  -2  923.62  111.87
   7   1  -2  897.96   46.06
   7  -1  -2 1001.58   68.55
  -7  -1   2 1040.22   82.25
   7  -1  -2  952.48  187.84
   7   1  -2  848.66  241.31
   7  -1  -2  832.92  242.68
  -7  -1   2  982.00  199.28
  -7   1   2 1160.30  276.87
  -7   1   2 1047.97  242.90
  -7  -1   2  950.53   76.88
   7  -1  -2  878.36   66.14
  -7   1   2 1084.66  264.57
   7   1  -2  974.38   84.42
  -7  -1   2 1230.69  319.05
   7  -1  -1   33.83   10.19
   7   1  -1    5.56   13.20
  -7  -1   1   30.39   11.10
   7  -1  -1    8.32   10.97
   7  -1  -1   -3.90   29.43
   7   1  -1    7.79   34.60
  -7   1   1  -29.25   55.72
  -7  -1   1   41.17   30.84
  -7  -1   1   18.95   24.55
   7  -1  -1   11.15   25.62
  -7   1   1   31.76   21.54
  -7  -1   1   67.19   41.92
  -7   1   1   28.81   35.75
   7  -1  -1  -25.97   29.95
  -7   1   1  -37.48   84.37
  -7  -1   1   28.76   41.52
   7   1  -1   32.92   23.06
   7   1   022955.40  601.05
   7  -1   021881.20  635.26
   7   1   021218.70  619.92
  -7   1   023312.50  685.45
  -7  -1   022093.80  644.84
  -7  -1   021954.70  667.23
   7  -1   021917.50  644.92
  -7   1   023961.30  696.86
  -7   1   024062.50  749.47
   7   1   022238.90  644.05
   7  -1   021503.20  647.95
   7  -1   020596.60  603.04
  -7  -1   022756.30  670.31
   7   1   020941.20  620.64
  -7   1   021667.20  638.86
   7   1   1  590.58   35.77
   7   1   1  599.87  139.97
  -7   1  -1  684.91  184.27
  -7  -1  -1  684.37  136.86
  -7  -1  -1  719.87  158.85
  -7   1  -1  533.16  138.05
  -7   1  -1  787.24  279.71
  -7  -1  -1  631.36  129.90
  -7   1  -1  582.40  228.45
  -7  -1  -1  382.22   95.62
   7   1   2  244.30   49.22
  -7  -1  -2  280.65  106.37
  -7   1  -2  255.94  128.35
  -7  -1  -2  209.47   71.45
  -7   1  -2  221.68   87.10
  -7   1  -2  221.30  106.39
  -7  -1  -2  257.22  161.68
  -7   1  -2  299.57   91.26
  -7  -1  -2  341.57   40.27
  -7   1  -3  142.35   85.32
  -7  -1  -3  292.32   79.91
  -7  -1  -3  109.39   71.80
  -7   1  -3  180.83   83.13
  -7   1  -3  325.64   62.77
  -7  -1  -3  314.28   70.55
  -7  -1  -3  128.23   65.53
  -7   1  -3  205.44   79.30
  -7  -1  -4  223.87   39.32
  -7   1  -4  134.78   28.15
  -7  -1  -4  150.23   50.26
  -7   1  -4  160.32   95.15
  -7  -1  -4  231.69  104.45
  -7  -1  -4  241.75   57.27
  -7   1  -4   60.87  103.76
  -7   1  -4  219.37   92.81
  -7   1  -4  354.29   85.64
  -7  -1  -4  227.87   70.61
  -7  -1  -5 1077.74   85.60
  -7   1  -5  976.84  124.43
  -7  -1  -5  906.26  145.49
  -7   1  -5 1122.94  224.90
  -7  -1  -5  909.17  260.81
  -7  -1  -5 1147.64  231.48
  -7   1  -5 1228.24  237.01
  -7   1  -5 1278.52  334.55
  -7  -1  -5 1311.29  369.45
  -7  -1  -6  843.59  146.82
  -7   1  -6  833.12  116.69
  -7   1  -6  552.68  110.18
  -7  -1  -6  628.83  106.45
  -7  -1  -6  865.11  125.79
  -7  -1  -6  810.95  185.95
  -7   1  -6 1000.49  204.65
  -7   1  -6  972.27  225.26
  -7  -1  -6  772.54  166.77
  -7   1  -7 5538.80  316.88
  -7  -1  -7 5331.73  342.08
  -7   1  -7 4940.93  280.94
  -7  -1  -7 4928.99  284.40
  -7   1  -7 5481.36  522.59
  -7  -1  -7 5411.24  351.56
  -7   1  -7 5940.02  239.55
  -7   1  -7 5672.44  363.68
  -7  -1  -7 5834.83  220.66
  -7   1  -8 5975.75  413.38
  -7  -1  -8 6222.87  307.15
  -7   1  -8 5320.99  261.44
  -7  -1  -8 5424.57  265.10
  -7   1  -8 6949.61  381.05
  -7  -1  -8 6095.06  349.42
  -7   1  -8 6544.91  349.78
  -7  -1  -8 6854.13  361.13
  -7   1  -9  635.31  139.66
  -7  -1  -9  579.69  161.87
  -7  -1  -9  418.28   71.75
  -7   1  -9  695.13  167.92
  -7  -1  -9  801.91  201.08
  -7   1  -9  690.91  253.21
  -7  -1  -9  659.38  143.59
  -7  -1  -9  639.44  160.42
  -7   1  -9  618.34  269.76
  -7   1 -10   26.64   18.21
  -7  -1 -10   36.70   32.69
  -7   1 -10   11.49   11.65
  -7   1 -10   57.57   43.55
  -7  -1 -10   60.99   49.62
  -7   1 -10   37.91   41.22
  -7  -1 -10  104.74   56.72
  -7   1 -10    3.89   26.87
  -7   1 -11 1880.67  190.93
  -7  -1 -11 1185.42  248.40
  -7  -1 -11 1435.50  516.87
  -7   1 -11 1746.48  323.17
  -7   1 -11 1653.55  351.62
  -7  -1 -11 1721.66  336.21
  -7   1 -11 1544.68  384.34
  -7   1 -12   45.72   23.64
  -7  -1 -12   29.44   31.21
  -7   1 -12   69.31   35.74
  -7  -1 -12   26.09   41.86
  -7   1 -12   64.71   35.87
  -7  -1 -12   83.55   50.84
  -7   1 -12   32.13   28.83
  -7   1 -13   20.59   19.93
  -7  -1 -13   30.60   21.48
  -7   1 -13   81.14   64.04
  -7  -1 -13   66.37   70.53
  -7  -1 -13   21.57   42.84
  -7   1 -13   41.51   32.97
  -7   1 -13   36.08   33.21
  -7   1 -14   77.84   31.65
  -7  -1 -14   69.27   22.15
  -7   1 -14   72.77   78.81
  -7  -1 -14    8.00   41.96
  -7   1 -14  119.63   45.50
  -7  -1 -14    3.77   38.09
  -7   1 -14   74.32   48.62
  -7   1 -15  202.36   47.07
  -7  -1 -15  190.34   63.02
  -7   1 -15  128.89  100.65
  -7  -1 -15  209.41   86.59
  -7  -1 -15  289.34  106.19
  -7  -1 -16   51.07   34.04
  -7   1 -16  100.95   73.46
  -7  -1 -16  172.91   86.65
  -7  -1 -16  126.62   57.08
  -7   1 -17   53.13   78.68
  -7  -1 -17   93.95  100.40
  -7  -1 -17  114.32   70.56
  -7   1 -18  117.92   56.68
  -7  -1 -18    0.41   48.53
  -7   1 -19   51.14   57.86
  -7  -1 -19  132.77   86.74
   7   3 -26  162.62   87.37
   7  -3 -25  150.18   48.12
   7   3 -25  117.43   88.34
   7   3 -24  196.83   97.10
   7  -3 -24   91.14   55.35
   7  -3 -23   36.32   77.14
   7   3 -23   97.70   70.73
   7  -3 -22   19.29   43.47
   7  -3 -21   31.74   71.57
  -7  -3  21   76.19   31.77
   7  -3 -20   90.53   81.45
  -7  -3  20  100.30   59.22
   7  -3 -19   40.16   78.23
  -7  -3  19   23.98   34.14
   7  -3 -18 1538.78  347.59
  -7  -3  18 1402.11  286.68
   7  -3 -17  -48.00   58.36
  -7  -3  17   26.85   62.09
   7  -3 -16 5431.20  427.68
  -7  -3  16 5532.68  333.51
  -7  -3  16 4963.47  200.93
   7   3 -16 4715.77  229.59
   7  -3 -15 2182.68  408.23
  -7  -3  15 2149.67  478.63
  -7  -3  15 1663.68  137.55
   7  -3 -14 1673.30  317.67
  -7  -3  14 1702.04  491.92
   7  -3 -12  965.72  283.03
  -7  -3  12  935.43  226.31
   7  -3 -1119432.80  678.64
  -7  -3  1119879.20  692.02
   7  -3 -10  782.08  141.37
  -7  -3  10  976.87  228.33
   7  -3 -10  769.67   38.17
   7  -3  -9 2477.78  197.23
  -7  -3   9 2857.91  143.97
   7  -3  -9 2504.29   74.71
  -7   3   9 2635.43  152.56
   7  -3  -8 3884.80  216.12
  -7  -3   8 4012.52  282.51
   7  -3  -8 3751.68  180.20
  -7   3   8 3893.32  212.62
   7  -3  -7 4566.90  235.85
  -7  -3   7 4541.78  252.95
   7   3  -7 4012.29  216.46
   7  -3  -7 4338.65  240.95
   7  -3  -7 4416.21  262.70
  -7   3   7 4592.88  218.91
   7  -3  -6 2965.49  240.57
   7   3  -6 2912.96  313.09
  -7  -3   6 2985.33  268.33
   7  -3  -6 2352.26  215.24
   7  -3  -6 2711.69  171.85
  -7   3   6 2781.24  204.56
   7  -3  -5 2380.89  150.41
   7   3  -5 1992.97   98.50
  -7  -3   5 2297.22  142.44
   7  -3  -5 2275.77  167.23
   7  -3  -5 2168.05  126.86
  -7   3   5 2361.77  140.90
   7  -3  -4 1213.50  120.23
   7   3  -4 1031.48   82.52
  -7  -3   4 1221.83  105.57
   7  -3  -4 1123.60  164.68
  -7   3   4 1438.14  254.97
   7  -3  -4  975.57  201.71
  -7   3   4 1221.64   93.22
   7  -3  -3 4489.04  210.98
   7   3  -3 4385.33  210.66
  -7  -3   3 4447.48  214.59
   7  -3  -3 4028.25  210.22
   7   3  -3 4645.04  231.57
  -7   3   3 4403.37  227.33
   7  -3  -3 4388.07  233.34
  -7  -3   3 4562.13  229.74
  -7   3   3 4662.41  419.59
  -7   3   2 2727.35  152.12
   7  -3  -2 2718.82  138.89
   7   3  -2 2908.62  242.74
  -7  -3   2 2753.70  219.86
   7   3  -2 2538.68  143.57
   7  -3  -2 2730.59  159.58
  -7   3   2 2778.52  196.06
  -7  -3   2 2735.73  157.05
  -7   3   2 2958.91  174.78
  -7   3   2 3131.54  290.04
   7   3  -2 2688.15  160.02
  -7   3   1 1250.08   56.65
   7  -3  -1 1273.15   61.10
   7   3  -1 1227.85   70.97
  -7  -3   1 1369.97  129.96
   7   3  -1 1303.15   91.81
  -7   3   1 1458.92  107.66
  -7  -3   1 1251.41  262.00
   7  -3  -1 1223.75   90.91
   7  -3  -1 1196.29  112.28
  -7   3   1 1423.64  100.86
  -7  -3   1 1200.12   82.30
  -7   3   1 1600.79  116.00
  -7   3   1 1217.83  330.63
  -7   3   010633.20  310.63
   7   3   010933.90  345.44
   7  -3   010683.30  289.38
  -7  -3   011036.40  335.82
   7   3   010689.70  343.61
  -7   3   011362.50  384.97
  -7  -3   010428.70  345.27
  -7   3   010886.00  373.62
  -7   3   011091.60  372.20
   7   3   010873.70  348.88
  -7  -3   011253.30  364.82
  -7   3   010568.40  358.22
  -7   3  -111481.70  229.27
   7   3   111324.00  267.08
  -7  -3  -111281.30  276.88
   7  -3   111802.40  230.25
  -7  -3  -111218.50  312.14
  -7   3  -111895.30  336.49
  -7   3  -111161.50  325.83
   7   3   111255.40  337.91
  -7   3  -111448.60  430.71
  -7  -3  -111586.90  468.74
  -7   3  -111128.60  327.22
  -7   3  -2    1.66    8.65
   7   3   2   40.01   24.18
  -7  -3  -2   16.98   28.09
   7  -3   2    7.71    5.67
  -7  -3  -2    0.32   50.89
  -7   3  -2  111.73   34.15
  -7  -3  -2   56.89   32.63
  -7   3  -2   24.51   58.55
  -7   3  -2   40.55   43.88
  -7  -3  -2   46.14   48.20
  -7   3  -2    1.66   38.72
   7   3   328073.30  595.26
  -7   3  -326795.20  505.19
  -7  -3  -328176.10  579.62
   7  -3   327295.10  519.84
  -7  -3  -327780.10  642.84
  -7   3  -328329.00  658.81
  -7  -3  -327791.10  683.92
  -7  -3  -328281.70  650.08
  -7   3  -326787.70  677.77
   7   3   4   53.00   23.08
  -7  -3  -4   75.92   28.95
  -7   3  -4   65.45   19.19
   7  -3   4   40.79   19.44
  -7   3  -4   23.86   34.11
  -7  -3  -4  112.32   54.34
  -7  -3  -4  121.72   51.17
  -7   3  -4  166.10   60.93
  -7   3  -4  100.54   51.75
  -7   3  -4   98.38   39.68
   7   3   5   74.89   27.77
  -7  -3  -5   84.33   37.96
  -7   3  -5   42.50   14.12
  -7   3  -5  133.84   65.97
  -7  -3  -5   90.81   57.72
  -7  -3  -5   78.61   30.77
  -7   3  -5  119.41   38.28
  -7   3  -5  133.30   56.72
  -7   3  -6 5506.14  341.11
   7   3   6 5491.16  320.90
  -7  -3  -6 5504.40  322.13
  -7   3  -6 5523.84  308.40
  -7   3  -6 5689.52  377.31
  -7  -3  -6 5704.70  388.44
  -7  -3  -6 5820.35  278.08
  -7   3  -6 6026.00  239.81
  -7   3  -6 5544.88  514.74
  -7   3  -7  117.98   37.88
  -7  -3  -7   79.06   49.14
  -7   3  -7   10.24   14.20
  -7  -3  -7   39.40   25.19
  -7   3  -7  104.01   68.98
  -7  -3  -7   68.98   52.23
  -7   3  -7  115.76   96.70
  -7   3  -8  338.04   89.72
  -7  -3  -8  408.50   90.49
  -7   3  -8  217.30   55.87
  -7  -3  -8  307.99   67.78
  -7   3  -8  467.37  168.96
  -7  -3  -8  456.13   99.75
  -7  -3  -8  403.64   66.49
  -7   3  -8  540.18  106.71
  -7   3  -8  314.96  216.88
  -7   3  -9   40.07   20.45
  -7  -3  -9   11.41   12.39
  -7   3  -9    2.33    8.87
  -7  -3  -9   45.04   30.26
  -7   3  -9   57.71   33.17
  -7  -3  -9    8.72   28.70
  -7   3  -9   38.04   72.71
  -7   3  -9   58.16   36.82
  -7   3 -10  114.81   34.65
  -7  -3 -10  142.34   31.98
  -7   3 -10   75.37   71.91
  -7  -3 -10   62.72   65.31
  -7   3 -10   65.30   52.36
  -7   3 -11 2613.50  202.84
  -7  -3 -11 3168.12  269.23
  -7   3 -11 2682.01  552.74
  -7  -3 -11 2812.89  737.97
  -7  -3 -11 2790.35  163.32
  -7   3 -11 2453.88  277.19
  -7   3 -12 3349.86  422.13
  -7  -3 -12 3014.92  535.41
  -7   3 -12 3360.08  737.80
  -7  -3 -12 2794.49  310.29
  -7  -3 -12 3262.35  201.26
  -7   3 -12 3354.20  490.47
  -7   3 -13  845.91  176.49
  -7  -3 -13 1036.84  218.14
  -7   3 -13 1223.16  255.76
  -7  -3 -13  914.74  219.49
  -7  -3 -13 1086.89  303.46
  -7   3 -13  902.92  274.15
  -7   3 -14 2005.08  467.87
  -7  -3 -14 2719.40  206.13
  -7   3 -14 2382.64  383.09
  -7  -3 -14 2864.27  224.55
  -7  -3 -14 2645.03  540.35
  -7   3 -14 2170.03  554.79
  -7   3 -15   14.68   18.83
  -7  -3 -15   31.62   15.23
  -7   3 -15   67.54   50.95
  -7  -3 -15    6.54   38.59
  -7  -3 -15   56.59   35.79
  -7   3 -15   79.96   51.44
  -7  -3 -16   70.82   29.16
  -7   3 -16  174.98   71.24
  -7  -3 -16   44.56   50.17
  -7  -3 -16   61.07   40.38
  -7   3 -16   99.61   51.05
  -7   3 -17   79.13   55.05
  -7  -3 -17  166.61   47.97
  -7  -3 -17   60.79   31.00
  -7   3 -17   71.45   39.63
  -7   3 -18   97.54   52.15
  -7  -3 -18  105.47   48.11
  -7  -3 -18    3.09   25.56
  -7   3 -18   33.65   22.45
  -7   3 -19  282.77   79.13
  -7  -3 -19  111.04   79.44
   7   5 -25  654.06  111.23
   7  -5 -24   31.14   55.68
  -7  -5  24   42.94   67.68
   7  -5 -23  155.00   58.83
  -7  -5  23  272.63   91.56
   7  -5 -22  125.74  103.84
  -7  -5  22  141.66   64.45
   7  -5 -21  396.32   95.00
  -7  -5  21  394.19   68.15
   7  -5 -20  660.34  179.15
  -7  -5  20  712.65  194.23
   7  -5 -19  171.57   78.86
  -7  -5  19  133.72   69.51
   7  -5 -18  436.67   85.13
  -7  -5  18   53.13   87.14
   7  -5 -17 1335.87  306.18
  -7  -5  17 1126.78  376.88
   7  -5 -16 2476.32  476.42
  -7  -5  16 2546.37  650.08
   7  -5 -15 5644.92  341.44
  -7  -5  15 6049.71  416.13
   7  -5 -14  237.13   89.70
  -7  -5  14  369.68  114.29
   7  -5 -13 2323.99  183.15
  -7  -5  13 2111.95  175.48
   7  -5 -12 1182.30  117.81
   7  -5 -11   66.08   26.43
  -7  -5  11   37.10   35.09
   7  -5 -11   40.62   14.98
   7  -5 -10  339.82   75.88
   7  -5 -10  281.07   88.13
   7  -5  -920622.50  588.18
  -7  -5   920981.20  542.78
   7  -5  -919686.20  434.23
   7  -5  -8 8554.58  286.90
  -7  -5   8 8618.54  291.94
   7  -5  -7 1822.96  297.09
  -7  -5   7 1627.16  150.82
   7  -5  -7 1466.79  111.91
  -7   5   6 3559.45  210.86
   7  -5  -6 3916.54  271.77
  -7  -5   6 4437.96  239.97
   7  -5  -6 3827.08  194.60
  -7   5   5 1831.84  257.27
   7  -5  -5 1975.19  124.16
   7   5  -5 1918.09  154.94
  -7  -5   5 2017.81  116.41
   7  -5  -5 1801.34   98.17
  -7   5   4 9797.03  375.33
   7  -5  -410158.50  327.56
   7   5  -4 9261.73  410.57
  -7  -5   4 9672.40  323.09
   7   5  -4 9593.88  306.74
   7  -5  -4 8543.76  316.38
  -7   5   3 1057.25  199.54
   7  -5  -3 1053.26   71.35
   7   5  -3 1025.08   70.66
  -7  -5   3 1150.22   80.10
   7   5  -3  985.95  158.84
   7  -5  -3 1095.08  133.01
   7  -5  -3  979.97  211.69
  -7  -5   3 1140.12  206.07
  -7   5   3 1150.62  288.03
  -7   5   2  327.80   79.98
   7  -5  -2  406.74  103.74
   7   5  -2  346.94   55.29
  -7  -5   2  385.20  136.08
   7   5  -2  369.28   91.85
   7  -5  -2  364.92  110.18
  -7  -5   2  482.45  110.21
  -7   5   2  447.19  108.12
  -7   5   2  332.90  119.34
  -7   5   1 1058.22   85.78
   7  -5  -1 1188.75   63.56
   7   5  -1 1006.33  137.01
  -7  -5   1 1232.43  222.05
   7   5  -1 1040.30   65.93
  -7  -5   1 1159.78  242.03
  -7   5   1 1337.70  102.75
  -7   5   1 1385.51  196.16
  -7  -5   1 1184.51   80.79
  -7   5   1 1436.53  351.07
  -7   5   0 2140.34  173.37
   7   5   0 2231.15  230.39
  -7  -5   0 2050.53   95.86
   7  -5   0 2114.82  153.65
   7   5   0 1753.52  184.22
  -7   5   0 2198.80  133.50
  -7  -5   0 2157.89  118.35
   7   5   0 1993.33   93.13
  -7   5   0 2241.25  241.30
  -7  -5   0 2272.60  113.38
  -7   5   0 1975.50  173.68
  -7   5  -1 8558.97  207.43
   7   5   1 8646.48  236.63
  -7  -5  -1 8821.11  250.03
   7  -5   1 8309.90  205.81
  -7   5  -1 8498.69  273.04
  -7  -5  -1 8692.25  351.83
   7   5   1 8300.16  285.98
  -7  -5  -1 9330.12  367.17
  -7   5  -1 8950.79  298.72
   7   5   2 8195.20  229.92
  -7   5  -2 7773.55  218.85
  -7  -5  -2 8529.01  248.56
   7  -5   2 8293.26  201.19
  -7  -5  -2 8612.98  303.79
  -7   5  -2 8594.09  400.62
  -7   5  -2 8992.47  290.65
  -7  -5  -2 7888.56  280.24
  -7   5  -2 8336.51  457.98
   7   5   310424.50  362.88
  -7   5  -310367.40  345.48
  -7  -5  -310767.60  382.25
   7  -5   310724.00  358.81
  -7   5  -311103.50  432.66
  -7  -5  -310691.70  430.42
  -7   5  -311047.10  420.75
  -7   5  -310288.60  509.83
   7   5   4 1015.92   78.69
  -7  -5  -4 1149.22  228.58
  -7   5  -4  873.50   99.12
   7  -5   4 1046.31   56.05
  -7   5  -4 1052.78  342.43
  -7  -5  -4 1193.06  111.20
  -7   5  -4 1074.16  256.18
  -7   5  -4 1071.46  219.38
   7   5   5 2106.91   97.39
  -7  -5  -5 2266.50  215.44
  -7   5  -5 1884.67   86.53
   7  -5   5 2173.12  145.22
  -7   5  -5 2173.83  145.28
  -7  -5  -5 2276.84  131.89
  -7  -5  -5 1939.36  134.02
  -7   5  -5 1968.79  238.29
   7   5   6  555.88  125.64
  -7  -5  -6  760.93  127.95
  -7   5  -6  514.17  103.79
   7  -5   6  560.86  144.68
  -7   5  -6  682.78  178.93
  -7  -5  -6  698.30  137.90
  -7  -5  -6  691.15  186.94
  -7  -5  -7 2478.98  140.84
  -7   5  -7 1629.26  275.77
   7  -5   7 2280.55  112.19
  -7   5  -7 2264.30  535.43
  -7  -5  -7 2572.06  482.15
  -7   5  -7 2262.04  217.09
  -7  -5  -8 1467.56  184.78
  -7   5  -8  806.15  174.79
   7  -5   8 1233.18   81.12
  -7   5  -8 1255.04  317.01
  -7  -5  -8 1308.56  331.35
  -7  -5  -8 1318.01  278.74
  -7   5  -8 1490.31  344.52
  -7  -5  -9  542.61  100.08
  -7   5  -9  159.32   59.60
   7  -5   9  384.21   81.56
  -7   5  -9  465.17  117.21
  -7  -5  -9  572.45  117.87
  -7  -5  -9  638.99  161.98
  -7   5  -9  171.66  114.96
  -7  -5 -10 4949.04  183.25
   7  -5  10 4857.60  202.34
  -7   5 -10 4660.92  260.79
  -7  -5 -10 4901.98  371.57
  -7  -5 -10 5124.48  230.63
  -7   5 -10 5271.52  233.63
  -7  -5 -11 1615.55  270.38
  -7   5 -11 1431.76  287.06
  -7  -5 -11 1181.20  337.03
  -7  -5 -11 1633.17  387.25
  -7   5 -11 1570.31  385.61
  -7   5 -12 1696.91  149.84
  -7  -5 -12 1021.20  229.18
  -7   5 -12 1586.35  306.36
  -7  -5 -12 1643.91  421.89
  -7  -5 -12 1640.84  276.84
  -7   5 -12 1343.32  385.94
  -7   5 -13 1765.21  134.57
  -7  -5 -13 1761.87  327.90
  -7   5 -13 1720.66  398.31
  -7  -5 -13 1301.67  497.83
  -7  -5 -13 1959.36  410.39
  -7   5 -13 1201.98  394.96
  -7   5 -14   21.57   23.21
  -7  -5 -14   18.20   13.53
  -7  -5 -14   -1.58   37.01
  -7   5 -14   55.12   22.54
  -7  -5 -14   20.71   25.62
  -7   5 -14   45.87   30.29
  -7  -5 -15  246.34   50.36
  -7  -5 -15  376.70   80.61
  -7   5 -15  410.74  129.52
  -7  -5 -15  393.86  145.60
  -7   5 -15  315.74   79.60
  -7  -5 -16   55.91   28.25
  -7   5 -16   21.77   40.79
  -7  -5 -16   42.46   44.15
  -7  -5 -16   51.73   41.85
  -7   5 -16   25.74   32.73
  -7  -5 -17   30.17   49.98
  -7  -5 -17   54.39   42.29
  -7   5 -17   14.15   26.81
  -7  -5 -18  229.65  103.77
  -7   5 -18  331.84   86.58
  -7  -5 -18  174.13   72.32
  -7   5 -18   89.01   48.81
   7  -7 -25  169.06   73.46
  -7  -7  25   36.92   46.99
   7  -7 -24   27.68   39.40
  -7  -7  24   36.15   65.13
   7  -7 -23  429.03  247.38
  -7  -7  23  446.50  246.32
   7  -7 -22  135.69   74.60
  -7  -7  22   55.36   58.89
   7  -7 -21 1058.23  313.31
  -7  -7  21  920.13  216.24
   7  -7 -20    4.24   71.08
  -7  -7  20   49.51   66.69
   7  -7 -19 2125.05  508.42
  -7  -7  19 3006.85  298.61
   7  -7 -18   68.35   60.47
  -7  -7  18    1.76   45.82
   7  -7 -17   63.96   37.94
  -7  -7  17   69.71   59.02
   7  -7 -16   19.20   37.74
  -7  -7  16   42.54   63.15
   7  -7 -15  161.92   57.20
  -7  -7  15  375.81  116.29
   7  -7 -14   95.59   47.08
  -7  -7  14   91.34   41.73
   7  -7 -1320657.60 1071.75
  -7  -7  1320924.70  489.87
   7  -7 -12   -5.97   74.33
  -7  -7  12  171.22   67.67
  -7  -7  1116394.00  727.53
   7  -7 -10  231.89   81.35
   7  -7  -9 5568.33  283.61
  -7  -7   9 6244.19  470.54
   7  -7  -8  253.76   57.64
  -7  -7   8  274.79   59.13
   7  -7  -710097.70  341.01
  -7  -7   710274.80  329.18
   7  -7  -6 1169.09  292.88
  -7  -7   6  858.77  180.89
   7  -7  -514864.50  404.38
  -7  -7   514859.50  425.88
  -7   7   4  588.37  128.59
   7  -7  -4  797.64  156.49
  -7  -7   4  739.63  199.92
   7   7  -4  767.99  172.71
  -7  -7   4  860.28  168.10
  -7   7   3  479.02  112.60
   7  -7  -3  691.54  145.69
  -7  -7   3  531.87  172.18
   7   7  -3  445.99  125.32
  -7  -7   3  675.20   79.01
  -7   7   3  644.31  164.11
  -7   7   2  443.34  100.28
   7  -7  -2  552.44  116.62
  -7  -7   2  645.19  109.89
   7   7  -2  474.47   97.69
  -7  -7   2  648.29  129.31
  -7   7   2  585.04  112.82
  -7   7   1 2755.37  101.50
  -7  -7   1 2776.25  121.43
   7  -7  -1 2797.32  110.88
   7   7  -1 2578.65  123.03
  -7  -7   1 2833.74  108.81
  -7   7   1 2921.54  134.68
  -7  -7   1 2782.20  110.50
  -7   7   0 2247.70   92.03
  -7  -7   0 2332.23  231.84
   7  -7   0 2147.99  101.69
   7   7   0 1918.68  204.26
  -7  -7   0 2363.50  280.90
  -7   7   0 2615.99  328.36
   7   7   0 2347.74  101.86
  -7   7   0 2272.90  126.02
  -7  -7   0 2389.33  126.22
  -7   7  -1 1175.16  147.37
   7  -7   1 1302.74   74.18
  -7  -7  -1 1155.51  307.75
  -7   7  -1 1290.12  263.40
  -7  -7  -1 1237.66  102.39
   7   7   1 1060.80   74.26
  -7   7  -1 1326.11  319.69
  -7  -7  -1 1002.30   79.63
  -7   7  -2   18.56   23.93
  -7  -7  -2   36.81   39.54
   7  -7   2  108.47   36.32
  -7  -7  -2   48.66   25.24
  -7   7  -2  107.62   76.31
  -7   7  -2   44.23   22.88
  -7   7  -2   67.00   64.33
  -7   7  -3 2001.10   92.05
  -7  -7  -3 2109.81  144.74
   7  -7   3 2179.26  181.89
  -7  -7  -3 2153.13  130.56
  -7   7  -3 2335.29  183.44
  -7   7  -3 2177.74  153.18
  -7   7  -4  617.75  132.82
  -7  -7  -4  825.04  164.41
   7  -7   4  700.95  154.09
  -7   7  -4  875.30  277.11
  -7  -7  -4  748.06  207.02
  -7   7  -4  966.51  157.81
  -7  -7  -5  680.05  100.77
  -7   7  -5  432.27  137.80
   7  -7   5  624.93  131.02
  -7   7  -5  731.04  177.72
  -7  -7  -5  844.04  239.29
  -7   7  -5  654.17  124.06
  -7  -7  -6  250.05   61.19
  -7   7  -6  219.79   31.25
   7  -7   6  274.76   58.50
  -7   7  -6  290.53   51.97
  -7  -7  -6  284.15   79.53
  -7   7  -6  258.79  136.17
  -7  -7  -7 9752.43  608.50
  -7   7  -7 8445.03  387.75
   7  -7   7 9722.73  417.02
  -7   7  -7 9954.11  474.59
  -7   7  -710146.60  486.55
  -7  -7  -8   43.70   33.51
  -7   7  -8   26.78   14.08
   7  -7   8   32.26   44.68
  -7   7  -8  132.52   66.93
  -7  -7  -8   59.21   36.26
  -7  -7  -8   93.92   37.79
  -7   7  -8  -30.17   45.05
  -7  -7  -9 9073.15  446.50
   7  -7   9 8372.43  458.28
  -7   7  -9 9272.01  481.10
  -7  -7  -9 9173.44  679.10
  -7  -7  -9 8583.59  468.34
  -7   7  -9 9678.48  500.51
  -7  -7 -10  632.58  110.02
   7  -7  10  234.70  132.39
  -7   7 -10  565.64  138.41
  -7  -7 -10  267.22   85.86
  -7  -7 -10  403.11   94.61
  -7   7 -10  543.04  104.59
  -7  -7 -11   51.74   54.91
   7  -7  11   64.74   28.28
  -7   7 -11   56.20   53.35
  -7  -7 -11  112.57   62.62
  -7  -7 -11    4.31   44.35
  -7   7 -11   61.59   46.66
  -7  -7 -12   26.57   33.00
   7  -7  12    6.09   22.90
  -7   7 -12   34.04   25.29
  -7  -7 -12   36.89   34.63
  -7  -7 -12   47.62   38.14
  -7   7 -12   34.16   36.39
  -7  -7 -13  431.97   89.72
   7  -7  13  202.19   92.65
  -7   7 -13  248.49   51.88
  -7  -7 -13  137.08  117.46
  -7  -7 -13  293.81   60.42
  -7   7 -13  121.23   80.52
  -7  -7 -14  206.68   72.61
  -7   7 -14  353.50   85.61
  -7  -7 -14  326.37   77.73
  -7  -7 -14  295.20   99.24
  -7   7 -14  142.37   95.58
  -7  -7 -15 1115.13  277.63
  -7   7 -15 1366.56  199.19
  -7  -7 -15 1584.59  512.74
  -7  -7 -15 1267.60  305.74
  -7   7 -15  976.21  444.55
  -7  -7 -16  207.40   80.49
  -7   7 -16  301.02   73.39
  -7  -7 -16  204.55   47.17
  -7  -7 -16  335.44   64.71
  -7   7 -16  219.57   53.16
  -7   7 -17 1663.84  205.54
  -7  -7 -17 1534.54  396.33
  -7  -7 -17 1037.01  374.46
  -7   7 -17 1272.19  331.94
  -7   7 -18   32.52   17.90
  -7  -7 -18   83.90   43.96
  -7   7 -18   56.31   28.65
   7  -9 -24   14.91   55.27
  -7  -9  24   48.98   37.41
   7  -9 -23   17.45   46.87
  -7  -9  23   43.23   48.94
   7  -9 -22  921.80  168.82
  -7  -9  22  750.80  215.46
   7  -9 -21  -28.89   37.76
  -7  -9  21   45.10   47.31
   7  -9 -20   76.73   38.47
  -7  -9  20  107.68   82.41
   7  -9 -19  278.57   84.02
  -7  -9  19  319.67  156.17
   7  -9 -18  614.64  150.15
  -7  -9  18  576.90  156.80
   7  -9 -17  543.43  128.39
  -7  -9  17  372.64   77.66
   7  -9 -16 2145.30  413.65
  -7  -9  16 2109.56  455.36
   7  -9 -15 2246.43  318.91
  -7  -9  15 2856.75  208.27
   7  -9 -14   90.20   58.47
   7  -9 -13 7259.33  620.04
  -7  -9  13 7612.28  572.44
   7  -9 -1212585.10  759.72
  -7  -9  1213131.10  662.03
   7  -9 -11  774.54  113.88
  -7  -9  11  746.02  245.79
   7  -9 -10 5602.99  376.72
  -7  -9  10 5851.15  333.44
  -7  -9   9 2125.18  170.99
   7  -9  -8  586.66  115.34
  -7  -9   8  546.68  125.01
   7  -9  -7  478.36   83.92
  -7  -9   7  511.07  112.66
   7  -9  -6  260.74   61.00
  -7  -9   6  240.64  164.69
   7  -9  -5  345.06  112.29
  -7  -9   5  472.27   96.47
   7   9  -5  321.12   89.62
   7  -9  -4   59.77   21.65
  -7  -9   4  -10.60   41.50
   7   9  -4   51.66   31.62
  -7  -9   4   67.12   30.80
   7  -9  -3 4395.70  289.70
  -7  -9   3 4305.06  206.62
   7   9  -3 4216.20  144.32
  -7  -9   3 4404.34  183.81
  -7   9   3 3983.40  171.05
   7  -9  -2 2531.81  133.69
  -7  -9   2 2608.92  235.34
   7   9  -2 2388.49  110.29
  -7   9   2 2795.25  259.08
  -7  -9   2 2718.68  121.32
   7  -9  -1  767.88  215.35
  -7  -9   1  870.67  159.85
  -7   9   1  895.97  118.35
  -7  -9   1  722.14  161.84
  -7  -9   0 1815.25  402.83
   7  -9   0 1964.48  211.07
  -7  -9   0 1746.93   92.65
  -7  -9   0 1691.58  123.67
  -7   9   0 1815.63  128.11
  -7   9  -1 1013.88  200.32
   7  -9   1 1204.69   97.95
  -7  -9  -1 1555.88  108.38
  -7   9  -1 1263.88  121.30
  -7  -9  -1 1226.30  272.12
   7   9   1  880.29  248.79
  -7   9  -1 1560.72  149.77
  -7   9  -2  582.88  139.76
  -7  -9  -2  869.30  241.94
   7  -9   2  982.37  246.00
  -7   9  -2  912.52  263.78
  -7  -9  -2  885.37  200.50
   7   9   2  949.08   79.54
  -7   9  -2  930.16  287.03
  -7  -9  -316782.30  584.74
   7  -9   315677.80  520.18
  -7  -9  -316426.80  553.38
  -7   9  -316882.40  591.15
  -7   9  -316436.50  570.80
  -7   9  -4  564.74  152.96
  -7  -9  -4  948.70  179.67
   7  -9   4 1011.98  236.87
  -7  -9  -4  957.32  210.84
  -7   9  -4 1017.33  341.06
  -7   9  -4 1082.18  259.50
  -7  -9  -5 1716.53  120.15
   7  -9   5 1865.76  101.83
  -7  -9  -5 1615.10  136.09
  -7   9  -5 1572.97  134.78
  -7   9  -5 1435.16  420.83
  -7  -9  -6 5657.31  408.46
   7  -9   6 5972.39  284.63
  -7   9  -6 6502.89  652.97
  -7  -9  -6 5596.40  335.35
  -7   9  -6 6282.13  349.34
  -7  -9  -7   44.50   27.44
   7  -9   7   19.88   24.23
  -7   9  -7   22.56   48.74
  -7   9  -7  133.38   64.88
  -7  -9  -8   76.77   31.15
   7  -9   8    3.59   16.16
  -7   9  -8  138.58   65.12
  -7  -9  -8   42.00   33.59
  -7   9  -8  -29.18   47.50
  -7  -9  -9   62.63   24.33
   7  -9   9   42.45   27.03
  -7   9  -9   18.50   44.98
  -7  -9  -9   20.76   38.40
  -7   9  -9    1.70   35.09
  -7  -9 -10  371.51  125.77
   7  -9  10  418.09   90.99
  -7   9 -10  197.21  132.33
  -7  -9 -10  253.21   88.18
  -7  -9 -10  380.05  107.44
  -7   9 -10  339.18  113.65
  -7  -9 -11   47.67   55.31
   7  -9  11   30.23   24.32
  -7   9 -11   10.40   41.45
  -7  -9 -11  129.87   55.88
  -7  -9 -11   20.30   55.25
  -7   9 -11   44.52   63.35
  -7  -9 -12  446.86   86.52
   7  -9  12  265.64   94.51
  -7   9 -12  451.28  129.28
  -7  -9 -12  515.00  139.74
  -7  -9 -12  541.27  158.04
  -7   9 -12  543.67  191.50
  -7  -9 -13 1439.72  306.38
  -7   9 -13 1529.01  240.47
  -7  -9 -13 1194.07  312.61
  -7  -9 -13 1267.99  237.62
  -7   9 -13 1357.05  356.43
  -7  -9 -14   39.00   35.04
  -7   9 -14   16.54   27.76
  -7  -9 -14   35.96   27.33
  -7  -9 -14   16.85   30.19
  -7   9 -14   22.73   51.96
  -7  -9 -15  169.78   69.31
  -7   9 -15  341.83   66.21
  -7  -9 -15  310.23   91.33
  -7  -9 -15  285.48  101.86
  -7   9 -15  228.85   65.66
  -7  -9 -16  460.05   99.56
  -7  -9 -16  719.14   92.34
  -7   9 -16  772.09  122.20
  -7  -9 -16  437.40  141.75
  -7   9 -16  420.51  135.57
  -7   9 -17   49.43   31.83
  -7  -9 -17  140.27   54.59
  -7  -9 -17   45.51   29.69
  -7   9 -17    1.62   19.28
   7 -11 -23   47.22   63.14
  -7 -11  23   30.52   45.26
   7 -11 -22    8.01   34.59
  -7 -11  22   14.95   37.48
   7 -11 -21  166.08   74.58
  -7 -11  21   60.42   61.32
   7 -11 -20  -17.13   56.08
  -7 -11  20  101.07   58.79
   7 -11 -19  123.28   61.84
  -7 -11  19  124.61   48.04
   7 -11 -18  294.86  117.20
  -7 -11  18  454.66  107.44
   7 -11 -17   24.25   42.18
  -7 -11  17  108.01   45.01
   7 -11 -16 8576.51  346.09
  -7 -11  16 8549.80  369.44
   7 -11 -15 1456.31  338.44
  -7 -11  15 1679.71  535.11
   7 -11 -14  730.87  187.77
  -7 -11  14  925.94  261.55
   7 -11 -13 1003.61  363.35
  -7 -11  13 1039.32  355.93
   7 -11 -12  824.90  200.41
  -7 -11  12  634.82  180.88
   7 -11 -11 4590.60  401.45
  -7 -11  11 4184.42  290.14
   7 -11 -10 6021.98  333.53
  -7 -11  10 6527.83  406.01
   7 -11  -9 2376.59  488.66
  -7 -11   9 2840.54  189.18
   7 -11  -8  300.84   99.86
  -7 -11   8  324.68  120.50
   7 -11  -7  355.33   71.20
  -7 -11   7  320.43   69.33
  -7 -11   6  385.78  141.05
   7  11  -6  227.45   34.18
   7 -11  -5  190.81   92.67
  -7 -11   5  198.44   89.69
   7  11  -5  123.54   22.33
  -7 -11   5  206.74   44.19
   7 -11  -4  705.28  103.82
  -7 -11   4  617.68  125.67
   7  11  -4  438.09   95.64
  -7 -11   4  562.93  110.90
  -7  11   4  541.34  152.82
   7 -11  -3   22.19   28.87
  -7 -11   3   49.93   35.76
   7  11  -3   33.15   10.84
  -7  11   3  119.06   31.80
  -7 -11   3    0.18   12.08
   7 -11  -2 1851.10  206.51
  -7 -11   2 1990.68  191.37
  -7  11   2 2162.89  113.13
  -7 -11   2 1972.29   96.71
  -7 -11   1 1226.64  105.05
   7 -11  -1 1405.31  371.86
  -7  11   1 1212.74  196.89
  -7 -11   0 5593.77  309.06
   7 -11   0 5105.98  329.93
  -7  11   0 5482.08  290.19
   7 -11   1  104.00  101.62
  -7 -11  -1  204.85   49.93
  -7 -11  -1  189.98   62.42
  -7  11  -1  118.08   57.37
  -7 -11  -2  162.39   94.44
   7 -11   2   89.70   49.38
  -7  11  -2  114.43   52.48
  -7 -11  -2   46.32   15.45
   7  11   2   33.37   24.45
  -7  11  -2  125.60   42.78
  -7 -11  -3 7279.72  392.31
   7 -11   3 7201.60  354.26
  -7  11  -3 7816.85  782.28
  -7 -11  -3 6592.96  310.47
  -7  11  -3 6853.78  346.48
  -7 -11  -4 1273.37  258.16
   7 -11   4 1182.64  302.02
  -7 -11  -4 1102.64  102.34
  -7  11  -4 1104.00  210.72
  -7 -11  -5  286.57   62.90
   7 -11   5  279.03   69.20
  -7 -11  -5  426.99  100.25
  -7  11  -5  309.75  101.08
  -7 -11  -6 1632.03  334.61
   7 -11   6 1599.17  147.52
  -7 -11  -6 1296.73  265.56
  -7  11  -6 1690.45  300.69
  -7 -11  -7   46.18   44.86
   7 -11   7   26.21   26.97
  -7  11  -7   78.15   58.14
  -7  11  -7   77.04   39.79
  -7 -11  -8  571.49  194.64
   7 -11   8  549.96  140.74
  -7  11  -8  663.22  114.41
  -7 -11  -8  584.55  161.94
  -7  11  -8  639.16  216.28
  -7 -11  -9  233.99   94.42
   7 -11   9  202.61   47.28
  -7 -11  -9  169.78   62.83
  -7  11  -9  166.10   57.72
  -7  11  -9  141.16   61.80
  -7 -11 -10  273.67   71.38
  -7  11 -10  386.13  118.31
  -7 -11 -10  298.77   71.15
  -7  11 -10  334.32   82.46
  -7 -11 -11  800.45  156.58
   7 -11  11  538.52  194.78
  -7  11 -11  747.49  148.26
  -7 -11 -11  730.22  200.66
  -7 -11 -11  820.87  131.65
  -7  11 -11  857.53  230.68
  -7 -11 -12   71.44   39.96
   7 -11  12   36.67   30.56
  -7  11 -12   10.65   36.45
  -7 -11 -12   25.06   27.17
  -7 -11 -12  101.38   57.83
  -7  11 -12  101.84   55.35
  -7 -11 -13  204.50   87.58
  -7  11 -13  171.17   54.53
  -7 -11 -13  281.15   99.66
  -7 -11 -13  265.25   76.43
  -7  11 -13  236.05   77.61
  -7 -11 -14   45.78   39.48
  -7  11 -14   19.66   55.33
  -7 -11 -14   12.98   20.26
  -7 -11 -14   23.37   19.21
  -7  11 -14   11.73   16.85
  -7 -11 -15  168.06   35.12
  -7  11 -15   81.51   64.32
  -7 -11 -15  116.60   46.44
  -7 -11 -15  170.22   36.12
  -7  11 -15  150.53   64.58
  -7 -11 -16  210.42   49.35
  -7  11 -16  332.64   47.84
  -7 -11 -16   82.82   58.07
  -7 -11 -16   97.88   50.27
  -7  11 -16  159.55   77.68
   7 -13 -22  113.23   58.16
  -7 -13  22   65.98   55.26
   7 -13 -21  109.74   54.29
  -7 -13  21   61.83   57.14
   7 -13 -20  187.91   95.27
  -7 -13  20  236.79   83.13
   7 -13 -19   49.42   37.34
  -7 -13  19   37.97   55.48
   7 -13 -18   76.24   50.17
  -7 -13  18  106.74   79.20
   7 -13 -17  415.71   92.47
  -7 -13  17  298.07   81.75
   7 -13 -16  227.33   73.26
  -7 -13  16  285.60   75.17
   7 -13 -15   42.65   42.46
  -7 -13  15   94.28   83.46
   7 -13 -14  939.89  202.02
  -7 -13  14  906.14  214.98
   7 -13 -13 5885.85  496.87
  -7 -13  13 5918.23  350.52
   7 -13 -12   42.89   38.94
  -7 -13  12   93.38   59.27
   7 -13 -11   -7.95   81.08
  -7 -13  11   70.12   87.24
   7 -13 -10  772.83  188.59
  -7 -13  10 1041.93  230.48
   7 -13  -9  239.34   97.66
  -7 -13   9  323.81   80.01
   7 -13  -8 1389.52  489.29
  -7 -13   8 1420.00  269.72
   7 -13  -7   32.62   37.16
  -7 -13   7   66.38   41.53
   7  13  -7    0.15    4.38
   7 -13  -6  117.66   53.22
  -7 -13   6   51.66   48.67
   7 -13  -5 2149.62  270.29
  -7 -13   5 2353.02  165.43
   7  13  -5 1725.57  130.03
  -7  13   5 2109.66  147.90
   7 -13  -4   55.45   32.63
  -7 -13   4  112.46   75.42
  -7  13   4   36.38   26.68
   7 -13  -3  728.34  208.78
  -7 -13   3  770.58  123.08
  -7  13   3  657.30  159.25
  -7 -13   2  243.21   82.74
  -7  13   2  187.04   45.21
  -7 -13   1   28.74   31.28
  -7  13   1   82.27   40.47
  -7 -13   0 1694.14  324.30
  -7  13   0 1478.34  337.88
  -7 -13  -1   78.27   71.16
  -7  13  -1  106.95   39.33
  -7 -13  -2  827.40  209.71
  -7 -13  -2  470.75  125.17
  -7  13  -2  568.34  276.97
  -7 -13  -3 3761.59  406.59
  -7 -13  -3 3164.56  182.48
  -7  13  -3 3512.66  222.78
  -7 -13  -4   -6.74   42.27
  -7  13  -4   73.68   30.83
  -7 -13  -5  166.15   40.96
  -7  13  -5  149.44   34.22
  -7 -13  -6 1598.70  329.50
  -7 -13  -6 1266.13  316.10
  -7  13  -6 1239.48  345.33
  -7 -13  -7  107.27   48.23
   7 -13   7   78.51   61.83
  -7  13  -7   66.30   29.72
  -7 -13  -8   35.62   33.63
   7 -13   8   32.73   42.32
  -7 -13  -8   37.80   24.24
  -7  13  -8   57.09   40.87
  -7 -13  -9   36.09   54.29
   7 -13   9   50.55   38.83
  -7 -13  -9   46.60   21.83
  -7  13  -9  118.73   63.38
  -7  13  -9   76.56   62.60
  -7 -13 -10  886.13  180.55
   7 -13  10  456.56  183.74
  -7  13 -10  875.25  183.09
  -7 -13 -10  689.09  152.41
  -7  13 -10 1005.10  288.95
  -7 -13 -11  231.06   41.31
   7 -13  11   46.46   53.66
  -7  13 -11  210.84   30.11
  -7 -13 -11   74.11   35.21
  -7  13 -11  187.74   56.98
  -7 -13 -12   31.59   27.25
  -7  13 -12   42.17   42.56
  -7 -13 -12   64.46   24.44
  -7  13 -12   70.74   63.28
  -7 -13 -13   63.55   19.49
  -7  13 -13   97.02   29.83
  -7 -13 -13   17.84   14.74
  -7 -13 -13   86.30   53.02
  -7  13 -13   59.22   45.55
  -7 -13 -14   11.16   18.23
  -7  13 -14    4.56   31.53
  -7 -13 -14   36.67   19.41
  -7 -13 -14    7.74   14.96
  -7  13 -14   38.91   22.86
  -7 -13 -15   12.56   23.51
  -7  13 -15   47.98   41.84
  -7 -13 -15   31.90   30.88
  -7 -13 -15   43.36   31.66
  -7  13 -15   17.41   33.65
   7 -15 -21  103.68   34.87
  -7 -15  21   21.73   16.87
   7 -15 -20    1.68   41.33
  -7 -15  20   82.62   52.51
   7 -15 -19  115.72   83.29
  -7 -15  19   14.33   27.36
   7 -15 -18  222.78  176.63
  -7 -15  18  237.96   86.25
   7 -15 -17  141.24   54.31
  -7 -15  17  250.95  114.31
   7 -15 -16   74.87   62.14
  -7 -15  16   49.53   46.95
   7 -15 -15  101.71   64.92
  -7 -15  15   49.21   33.51
   7 -15 -14  290.97  132.93
  -7 -15  14   73.60   63.46
   7 -15 -13   93.73   46.06
  -7 -15  13   48.02   50.77
   7 -15 -12  650.43  303.13
  -7 -15  12  618.88  194.07
   7 -15 -11  138.90   65.14
  -7 -15  11   55.61   86.95
   7 -15 -10  135.83   53.38
  -7 -15  10  132.40   65.42
   7 -15  -9  131.17   86.62
  -7 -15   9  272.46   68.62
   7 -15  -8 2556.93  507.36
  -7 -15   8 2944.05  587.56
   7 -15  -7  797.38  111.97
  -7 -15   7  751.78  284.90
   7 -15  -6  430.52  113.66
  -7 -15   6  584.55  225.40
  -7  15   6  304.11   72.93
   7 -15  -5  234.46   61.23
  -7 -15   5  260.02   75.45
  -7  15   5  172.09   57.80
   7 -15  -4  865.15  198.98
  -7 -15   4  762.01  168.41
  -7  15   4  512.14  155.92
   7 -15  -3 1673.53  500.79
  -7 -15   3 3086.12  408.42
  -7  15   3 1684.83  289.46
   7 -15  -2  386.16   75.20
  -7 -15   2  336.32  124.92
  -7  15   2  260.08   73.54
  -7 -15   1 3421.74  798.58
   7 -15  -1 3795.66  519.93
  -7  15   1 3187.62  154.04
  -7 -15   0 2273.11  507.12
   7 -15   0 2234.64  162.82
  -7  15   0 1901.33  212.94
   7 -15   1   58.13   72.16
  -7 -15  -1   89.61   65.53
  -7  15  -1   53.13   29.89
  -7 -15  -2  938.07  198.86
   7 -15   2  640.08  205.84
  -7 -15  -3   90.57   64.73
   7 -15   3   63.66   36.99
  -7 -15  -4 1349.75  274.10
   7 -15   4  906.22  258.13
  -7  15  -4 1092.37  175.19
  -7 -15  -5  433.78  115.45
  -7  15  -5  393.14   95.40
  -7 -15  -5  237.19   65.30
  -7 -15  -6  299.95   80.93
   7 -15   6  316.39   76.26
  -7 -15  -6  100.12   63.32
  -7  15  -6  172.24   57.04
  -7 -15  -7   53.56   57.12
   7 -15   7  156.86   60.49
  -7 -15  -7   43.75   30.73
  -7  15  -7   25.72   13.82
  -7 -15  -8  615.17  169.14
   7 -15   8  522.89  164.89
  -7 -15  -8  468.80  171.52
  -7  15  -8  437.00  147.86
  -7 -15  -9   45.31   57.97
   7 -15   9   49.34   27.87
  -7  15  -9   49.10   33.97
  -7 -15 -10   81.50   44.99
   7 -15  10   24.10   21.37
  -7  15 -10   35.11   37.23
  -7  15 -10    2.80   54.32
  -7 -15 -11   91.55   36.54
  -7  15 -11    3.44   23.12
  -7  15 -11   64.70   55.14
  -7 -15 -12   39.48   40.56
  -7  15 -12   17.17   31.86
  -7  15 -12   47.67   87.88
  -7 -15 -13   21.30   37.87
  -7  15 -13   19.23   16.92
  -7  15 -13   53.89   24.63
  -7 -15 -14   57.08   43.53
  -7  15 -14   56.42   41.96
  -7 -15 -14   27.67   26.55
  -7  15 -14   98.79   53.33
   7 -17 -19   96.35   42.06
  -7 -17  19  151.73   96.02
   7 -17 -18   54.15   25.86
  -7 -17  18   83.54   55.14
   7 -17 -17   14.42   36.33
  -7 -17  17   20.58   36.98
   7 -17 -16   52.52   35.64
  -7 -17  16   24.28   42.96
   7 -17 -15  103.75   51.07
  -7 -17  15  108.37   68.89
   7 -17 -14  178.79   94.60
  -7 -17  14  260.63   76.42
   7 -17 -13  212.63   48.69
  -7 -17  13  139.00   50.64
   7 -17 -12  809.13  249.85
  -7 -17  12  878.74  273.55
   7 -17 -11  110.34   70.38
  -7 -17  11   81.63   64.56
   7 -17 -10 1091.44  194.34
  -7 -17  10  992.93  223.10
   7 -17  -9   40.71   84.55
  -7 -17   9  139.76   69.49
   7 -17  -8 1251.76  338.50
  -7 -17   8 1368.21  433.65
   7 -17  -7   90.76   66.17
  -7 -17   7  182.81   63.79
  -7  17   7   32.90   19.62
   7 -17  -6  126.27   89.55
  -7 -17   6  143.24   68.12
  -7  17   6   36.09   28.07
   7 -17  -5   56.96   78.71
  -7 -17   5   62.10   49.98
  -7  17   5   11.22   14.44
   7 -17  -4   49.90   35.59
  -7 -17   4   69.34   41.98
  -7  17   4   27.93   20.94
   7 -17  -3  360.27  103.01
  -7 -17   3  375.64   84.06
  -7  17   3  165.18   62.27
   7 -17  -2 1101.10  255.04
  -7 -17   2 1218.15  310.58
  -7  17   2  891.97   90.80
   7 -17  -1  189.25   64.93
  -7 -17   1   83.65   96.84
  -7  17   1  118.08   37.27
  -7 -17   0  321.40  191.25
   7 -17   0  206.27   55.05
  -7  17   0  189.86   42.51
   7 -17   1   46.57   41.05
  -7 -17  -1   34.07   39.93
  -7 -17  -2   52.30   38.89
   7 -17   2   69.67   33.75
  -7 -17  -3  849.09  144.97
   7 -17   3  897.32  279.05
   7 -17   4   13.36   43.89
  -7 -17  -5   29.87   73.65
   7 -17   5    3.44   28.08
  -7 -17  -6  149.40   48.31
   7 -17   6  101.13   70.66
  -7  17  -6  105.58   41.63
  -7 -17  -7   64.29   24.04
   7 -17   7   20.13   33.95
  -7  17  -7   32.87   18.80
  -7 -17  -8   22.45   28.44
   7 -17   8    8.96   33.19
  -7  17  -8    6.35    9.52
  -7 -17  -9  535.10  136.59
   7 -17   9  195.89   98.19
  -7  17  -9  281.61   99.48
  -7 -17 -10   77.50   45.55
  -7  17 -10   25.25   24.21
  -7 -17 -11   72.40   37.48
  -7  17 -11   45.02   42.35
  -7 -17 -12  415.35   70.29
   7 -19 -17  107.17   55.35
  -7 -19  17   28.11   42.91
   7 -19 -16  285.99   78.57
  -7 -19  16  423.24  119.62
   7 -19 -15  153.74   93.32
  -7 -19  15   87.68   82.92
   7 -19 -14   73.63   51.69
  -7 -19  14   91.96   58.15
   7 -19 -13  109.48  107.07
  -7 -19  13  142.37  133.85
   7 -19 -12  547.40  164.18
  -7 -19  12  792.93  132.85
   7 -19 -11  528.26  138.29
  -7 -19  11  681.53  167.16
   7 -19 -10  743.17  173.10
  -7 -19  10  754.02  215.26
   7 -19  -9  175.07   71.94
  -7 -19   9   61.18   40.51
   7 -19  -8  597.15  192.45
  -7 -19   8  663.49  144.68
   7 -19  -7   15.12   60.29
  -7 -19   7   37.77   47.93
   7 -19  -6 1093.86  354.88
  -7 -19   6 1239.55  283.84
   7 -19  -5  301.27  129.10
  -7 -19   5  246.21  116.02
   7 -19  -4  204.80   79.11
  -7 -19   4  206.58  142.37
   7 -19  -3   39.92   24.47
  -7 -19   3   20.59   53.18
   7 -19  -2    9.21   53.66
  -7 -19   2  223.20   96.46
   7 -19  -1   24.24   37.36
  -7 -19   1   63.14   39.30
  -7 -19   0  537.04  143.05
   7 -19   0  409.78  389.02
  -7 -19  -1  100.96   61.80
   7 -19   1   55.50   70.00
  -7 -19  -2 1132.10  224.92
   7 -19   2 1223.15  355.70
  -7 -19  -3  138.76  120.93
   7 -19   3  180.86   62.22
  -7 -19  -4   53.38   56.66
   7 -19   4   70.08   37.23
  -7 -19  -5   23.06   35.56
   7 -19   5   36.20   28.92
  -7 -19  -6   34.24   64.59
   7 -19   6   25.36   33.82
  -7 -19  -7   75.36   65.81
   7 -19   7  102.06   51.51
  -7 -19  -8  205.46  101.53
   7 -19   8   22.98   27.65
  -7 -19  -9   49.17   58.05
  -7 -19 -10  608.26  240.41
   7 -21 -14   84.36   44.73
  -7 -21  14   19.62   25.64
   7 -21 -13  765.01  227.28
  -7 -21  13  543.54  213.57
   7 -21 -12   28.73   57.50
  -7 -21  12   72.42   48.34
   7 -21 -11  147.66   77.92
  -7 -21  11  225.63   82.59
   7 -21 -10  252.89  132.25
  -7 -21  10   98.97   56.01
   7 -21  -9  428.41  118.61
  -7 -21   9  969.17  214.33
   7 -21  -8   -2.06   26.57
  -7 -21   8   39.42   27.98
   7 -21  -7  452.43  138.81
  -7 -21   7  431.98  208.25
   7 -21  -6   55.66   90.43
  -7 -21   6   40.33   18.65
   7 -21  -5  134.55   55.18
  -7 -21   5  159.35   70.15
   7 -21  -4  105.28   67.29
  -7 -21   4  114.27   66.48
   7 -21  -3  140.50   62.80
  -7 -21   3  294.85  117.26
   7 -21  -2   -1.72   19.19
  -7 -21   2   30.42   46.77
   7 -21  -1  465.81  222.75
  -7 -21   1  541.08  148.67
   7 -21   0   32.07   28.68
  -7 -21   0   99.90   48.51
  -7 -21  -1  358.10  110.09
   7 -21   1  276.17  146.19
  -7 -21  -2  113.78   81.67
   7 -21   2  110.56   32.35
  -7 -21  -3  659.40  239.17
   7 -21   3  464.85  216.90
  -7 -21  -4   30.52   59.71
   7 -21   4   98.24   44.42
  -7 -21  -5  227.11  120.11
  -7 -21  -6   37.98   39.80
   7 -21   6   -7.55   12.07
  -7 -21  -7   76.70   41.40
   7 -21   7   38.87   33.19
   7 -23  -9   31.62   69.85
  -7 -23   9   84.18   33.70
   7 -23  -8    3.17   20.95
  -7 -23   8   87.12   44.61
   7 -23  -7  483.48  115.97
  -7 -23   7  496.49  131.53
   7 -23  -6  101.53   73.89
  -7 -23   6   81.87   49.88
   7 -23  -5  136.99   59.62
  -7 -23   5  154.89   46.66
   7 -23  -4   29.43   11.44
  -7 -23   4   20.08   48.72
   7 -23  -3   57.44   54.02
  -7 -23   3   42.88   52.82
   7 -23  -2   24.35   26.57
  -7 -23   2   41.76   35.18
   7 -23  -1   32.59   49.83
  -7 -23   1  140.47   71.37
  -7 -23   0   39.75   52.63
   7 -23   0  113.40   62.16
   7 -23   1  154.63   71.80
  -7 -23  -1  150.51   66.10
   8   0 -25   24.61   44.39
   8   0 -24  943.42  176.40
   8   0 -23   50.01   29.29
   8   0 -22  499.11  116.10
   8   0 -21   36.54   61.52
   8   0 -20 1549.23  461.10
   8   0 -19  120.77   49.45
   8   0 -18 7897.97  503.52
   8   0 -17   34.50   53.19
  -8   0  1611258.80  629.75
  -8   0  15  -27.65   65.20
  -8   0  1429976.40 1098.08
  -8   0  13   30.56   57.73
  -8   0  1218863.30  830.35
  -8   0  11   34.76   53.67
  -8   0  11    2.81    9.09
   8   0 -11   18.55    8.11
  -8   0  10 1626.55  407.46
  -8   0  10 1328.41   82.14
   8   0 -10 1095.16  111.24
  -8   0   9   60.58   40.42
  -8   0   9   10.25   16.32
   8   0  -9   16.10   15.75
   8   0  -8  161.24   50.09
  -8   0   8  178.02   76.68
  -8   0   8  115.57   33.69
   8   0  -8  123.34   20.12
   8   0  -7   13.71   14.94
  -8   0   7   95.87   56.00
  -8   0   7   25.22   12.24
   8   0  -7   30.29   34.65
   8   0  -6 5103.29  251.46
  -8   0   6 5263.69  257.27
  -8   0   6 5267.49  250.72
   8   0  -6 5031.36  239.90
   8   0  -5   -2.66   21.73
  -8   0   5   21.37   17.72
  -8   0   5  -20.73   36.31
   8   0  -5  -17.26   24.39
  -8   0   5   46.61   18.92
   8   0  -413409.30  386.81
  -8   0   414063.10  419.43
  -8   0   413117.00  417.99
   8   0  -414379.40  439.75
  -8   0   414462.70  473.45
   8   0  -3   21.18   15.84
  -8   0   3  -41.68   25.41
  -8   0   3  -32.63   63.06
  -8   0   3   63.60   35.16
   8   0  -3  -41.66   49.07
  -8   0   3   29.79   37.64
   8   0  -296210.80 2130.48
  -8   0   299428.00 2205.25
   8   0  -293991.10 2144.28
  -8   0   2100687.5 2315.63
  -8   0   292999.00 2226.67
   8   0  -292873.90 2133.77
  -8   0   2101985.2 2348.62
   8   0  -1   -2.91    8.11
  -8   0   1   32.53   47.27
  -8   0   1  -32.92   73.12
  -8   0   1   64.11   37.28
  -8   0   1    9.65   38.93
  -8   0   0 9259.32  305.73
  -8   0   0 9885.37  309.54
  -8   0   0 8818.68  345.40
  -8   0   0 9107.78  287.80
  -8   0  -1   46.31   58.06
  -8   0  -1   98.30   57.64
  -8   0  -1  -29.14   53.94
  -8   0  -1  -53.55   63.38
  -8   0  -2  102.98   49.94
  -8   0  -2  187.27   85.06
  -8   0  -2  322.52   60.83
  -8   0  -2  179.07   91.65
  -8   0  -3    0.30    1.72
  -8   0  -3    4.82    3.27
  -8   0  -3   53.29   47.19
  -8   0  -3   17.15   41.48
  -8   0  -3  -70.25   56.81
  -8   0  -3   40.21   38.34
  -8   0  -433454.50  989.68
  -8   0  -435598.70  711.46
  -8   0  -436620.70  591.45
  -8   0  -433628.60 1108.16
  -8   0  -435143.10  735.14
  -8   0  -6 2971.22  182.61
  -8   0  -6 2773.67  164.30
  -8   0  -6 3002.99  274.09
  -8   0  -6 3321.36  256.53
  -8   0  -7    2.12   10.08
  -8   0  -7    5.50    8.13
  -8   0  -7   64.30   64.48
  -8   0  -7   -6.84   53.49
  -8   0  -7   41.47   27.44
  -8   0  -8  308.19   71.84
  -8   0  -8  193.15   51.30
  -8   0  -8  438.13  169.31
  -8   0  -8  464.83   80.36
  -8   0  -8  299.78   96.23
  -8   0  -9    2.22   11.88
  -8   0  -9   15.99    8.07
  -8   0  -9   -3.53   51.47
  -8   0  -9  -16.92   44.76
  -8   0  -9  156.69   61.13
  -8   0 -10  360.57   73.57
  -8   0 -10  360.87  118.37
  -8   0 -10  313.00  129.78
  -8   0 -10  479.12  123.76
  -8   0 -11    6.28   17.63
  -8   0 -11   51.38   27.39
  -8   0 -11   50.00   60.81
  -8   0 -11   71.03   41.14
  -8   0 -12  481.89  224.02
  -8   0 -12  695.90  142.88
  -8   0 -12  830.66  203.49
  -8   0 -13    7.01   14.21
  -8   0 -13  -78.64   49.61
  -8   0 -13   48.50   53.32
  -8   0 -14 2061.08  285.38
  -8   0 -14 2479.42  519.50
  -8   0 -14 2214.26  426.67
  -8   0 -15   57.37   37.75
  -8   0 -15   49.10   33.44
  -8   0 -16 1369.67  300.59
  -8   0 -17   31.67   62.13
  -8   0 -18   32.06   40.94
   8   2 -25  126.03  100.20
   8  -2 -25   40.97   29.82
   8   2 -24  143.72   49.81
   8  -2 -24  296.49   97.01
   8  -2 -23  219.97  100.19
   8   2 -23   49.65   83.99
   8  -2 -22   60.83   59.38
   8   2 -22  196.31   90.11
   8  -2 -21  898.32  190.66
   8   2 -21  643.61  157.05
   8  -2 -20 1670.71  318.96
  -8  -2  20 1522.78  367.65
   8  -2 -19  390.51  109.09
  -8  -2  19  425.95  114.30
   8  -2 -18 3553.99  282.69
  -8  -2  18 3613.12  689.63
   8  -2 -17 1602.15  336.12
  -8  -2  17 1584.36  287.57
   8  -2 -16   58.43   42.83
  -8  -2  16   45.98   83.61
   8  -2 -15 9639.59  555.36
  -8  -2  1510253.60  749.59
   8  -2 -14  697.32  159.23
  -8  -2  14  734.12  211.74
  -8  -2  14  437.09   60.31
   8   2 -14  451.41   63.46
  -8  -2  13 1787.39  348.44
   8   2 -13 1455.60  110.07
   8  -2 -12 6530.50  300.26
  -8  -2  12 6715.02  334.63
   8   2 -12 6298.08  237.72
   8  -2 -1110393.30  594.71
  -8  -2  1110524.40  421.01
   8   2 -11 9841.63  358.34
   8  -2 -1021528.20  539.39
  -8  -2  1021794.30  660.74
   8   2 -1020832.10  478.09
   8  -2  -9  406.92  157.29
  -8  -2   9  660.07  121.60
  -8   2   9  665.46   60.62
   8   2  -9  569.26  122.03
   8  -2  -817501.90  437.00
  -8  -2   817464.60  520.26
   8  -2  -817022.20  440.73
  -8   2   816554.70  418.64
   8   2  -816371.90  407.55
  -8   2   817740.50  449.13
   8  -2  -7  620.27  175.79
   8   2  -7  690.59  177.00
  -8  -2   7  870.38  219.29
   8  -2  -7  745.58  163.98
   8  -2  -7  858.27   73.17
  -8   2   7  873.41   74.24
  -8   2   7  816.27  195.17
   8   2  -7  705.51  185.47
   8  -2  -6 6566.33  314.21
   8   2  -6 6379.30  298.12
   8  -2  -6 6716.22  463.20
  -8  -2   6 6837.86  359.57
   8  -2  -6 6670.11  313.72
  -8   2   6 7185.96  332.83
   8  -2  -6 6042.62  303.15
  -8   2   6 7140.00  327.62
   8   2  -6 6237.16  289.23
   8  -2  -5 8252.72  269.28
   8   2  -5 7771.43  363.96
  -8  -2   5 7651.25  354.04
   8  -2  -5 8155.01  244.97
   8  -2  -5 7698.27  355.17
  -8   2   5 7624.08  352.23
   8  -2  -5 7412.70  341.08
  -8   2   5 8410.47  290.54
   8   2  -5 7827.98  381.73
   8  -2  -410011.20  313.19
   8   2  -4 9769.34  386.89
  -8  -2   4 9771.67  309.07
   8  -2  -4 9625.80  298.01
   8   2  -4 9323.74  310.16
   8  -2  -4 9455.31  392.36
  -8  -2   410200.70  365.78
  -8   2   4 9746.09  329.45
   8  -2  -4 9575.20  360.67
   8   2  -4 9298.46  312.61
  -8   2   4 9456.04  380.98
   8  -2  -318206.10  529.21
   8   2  -318297.20  512.87
  -8  -2   318834.70  547.84
   8  -2  -318905.20  521.70
   8   2  -317938.30  531.90
  -8  -2   319204.70  621.48
   8  -2  -316727.50  522.94
  -8   2   317421.50  529.87
  -8   2   318973.30  575.42
  -8  -2   319404.80  577.56
   8  -2  -317929.50  573.95
  -8   2   319119.50  576.86
   8   2  -317932.30  572.34
   8  -2  -2 9798.70  285.55
   8   2  -2 9836.79  310.21
  -8  -2   210418.40  306.72
   8  -2  -210233.10  294.47
   8   2  -2 9217.64  311.32
  -8  -2   210968.20  369.82
  -8   2   210453.40  354.08
  -8  -2   210184.40  344.38
  -8   2   210259.50  354.91
   8  -2  -2 8931.57  333.87
  -8   2   210343.70  350.36
   8  -2  -1 1070.46   51.72
  -8  -2   1 1089.41   79.80
  -8   2   1 1100.31  190.85
  -8  -2   1 1073.92  310.52
  -8  -2   1 1208.81  289.59
  -8   2   1 1393.25  352.84
  -8  -2   1 1161.98  268.90
  -8   2   1 1152.63  255.02
  -8   2   1 1156.57  380.80
   8   2   0 8139.47  198.20
  -8  -2   0 7713.32  196.11
  -8   2   0 7468.63  224.34
  -8  -2   0 8073.35  274.24
  -8  -2   0 8219.00  320.62
  -8   2   0 8376.41  405.31
  -8   2   0 7961.92  266.16
  -8  -2   0 8165.42  278.28
  -8   2   0 7859.44  265.43
   8   2   117609.60  386.91
  -8  -2  -117726.80  370.20
  -8  -2  -118873.10  479.02
  -8   2  -118211.60  467.36
  -8  -2  -117452.50  455.97
  -8   2  -117599.50  461.49
  -8  -2  -117607.40  449.42
  -8   2  -118478.50  570.31
  -8   2  -119526.50  504.57
   8   2   2 2763.74  118.64
  -8  -2  -2 2962.50  121.72
  -8  -2  -2 3147.29  210.29
  -8   2  -2 2976.51  147.54
  -8  -2  -2 2915.31  446.19
  -8   2  -2 3387.50  374.37
  -8  -2  -2 2727.30  136.67
  -8   2  -2 2683.31  153.30
  -8   2  -2 3142.15  158.79
   8   2   3 1825.38  101.94
  -8  -2  -3 1854.79   78.72
  -8   2  -3 1874.21  128.58
  -8  -2  -3 1950.19  245.16
  -8  -2  -3 1772.96  131.58
  -8   2  -3 1846.03  130.28
  -8   2  -3 2311.07  501.02
  -8  -2  -3 2037.82  187.13
  -8   2  -3 1822.95  126.73
   8   2   4 1600.44   93.59
  -8   2  -4 1529.75   27.03
  -8  -2  -4 1548.68   67.12
  -8   2  -4 1604.71  496.31
  -8  -2  -4 1603.18  138.15
  -8  -2  -4 1607.10  125.24
  -8   2  -4 1889.02  190.35
  -8   2  -4 1735.91  140.53
  -8   2  -4 1603.93  143.05
  -8  -2  -5  751.24   82.48
  -8   2  -5  652.65   43.48
  -8  -2  -5  753.84   87.16
  -8  -2  -5  722.00  206.30
  -8  -2  -5  773.10  197.62
  -8   2  -5 1052.43  189.53
  -8   2  -5  838.14  220.78
  -8  -2  -6   60.20   26.67
  -8   2  -6   22.93   10.77
  -8  -2  -6    2.43   13.24
  -8   2  -6  -19.36   56.81
  -8  -2  -6   84.27   36.85
  -8  -2  -6   41.36   50.36
  -8   2  -6  127.44   57.29
  -8   2  -7 8207.14  356.24
  -8  -2  -7 7924.39  379.26
  -8   2  -7 7499.79  336.58
  -8  -2  -7 7807.27  350.17
  -8   2  -7 8557.91  441.62
  -8  -2  -7 8228.17  448.00
  -8  -2  -7 8442.22  429.21
  -8   2  -7 8472.07  449.59
  -8   2  -7 9032.74  492.24
  -8   2  -8 1668.56  100.63
  -8  -2  -8 1750.05  257.98
  -8   2  -8 1315.34  121.09
  -8  -2  -8 1289.61  121.85
  -8   2  -8 1774.50  409.35
  -8  -2  -8 1838.62  408.60
  -8  -2  -8 1909.73  493.66
  -8   2  -8 1797.51  450.73
  -8   2  -8 1632.98  450.59
  -8   2  -9  527.65  125.80
  -8  -2  -9  555.50  141.35
  -8   2  -9  362.94   84.91
  -8  -2  -9  264.76   77.46
  -8   2  -9  581.20  126.67
  -8  -2  -9  554.55  137.90
  -8   2  -9  653.06  138.88
  -8  -2  -9  862.62  221.54
  -8   2  -9  531.46  222.88
  -8   2 -10  894.42  191.95
  -8  -2 -10  953.25  143.42
  -8   2 -10 1156.83  313.54
  -8  -2 -10 1007.11  154.78
  -8  -2 -10 1202.67  271.56
  -8   2 -10 1122.09  282.22
  -8   2 -10  996.01  309.60
  -8   2 -11  224.09   47.51
  -8  -2 -11  285.42   80.56
  -8   2 -11  311.94   77.95
  -8  -2 -11  400.90  133.56
  -8   2 -11  331.64   92.28
  -8  -2 -11  455.21  104.02
  -8   2 -11  373.56   87.36
  -8   2 -12    7.83   10.96
  -8  -2 -12   32.69   16.26
  -8   2 -12  -61.70   46.41
  -8  -2 -12   14.33   30.10
  -8  -2 -12   24.34   43.05
  -8   2 -12   42.64   58.75
  -8   2 -12   49.49   44.15
  -8   2 -13  443.02  135.75
  -8  -2 -13  938.01  173.76
  -8   2 -13 1235.26  251.08
  -8  -2 -13 1107.08  237.63
  -8  -2 -13 1026.50  282.49
  -8   2 -13  988.60  309.71
  -8  -2 -14   39.86   29.90
  -8   2 -14   45.62   49.41
  -8  -2 -14   88.74   57.31
  -8  -2 -14   31.80   26.58
  -8   2 -14   81.76   42.86
  -8   2 -15  120.91   67.27
  -8  -2 -15   47.26   23.82
  -8  -2 -15   55.03   47.05
  -8   2 -15   56.55   15.36
  -8   2 -16   26.50   37.32
  -8  -2 -16   61.65   40.97
  -8  -2 -16   45.12   26.91
  -8   2 -16   28.62   22.04
  -8   2 -17  347.01  140.73
  -8  -2 -17  301.72   90.04
  -8  -2 -17  165.97   52.53
  -8   2 -18   89.55   28.74
  -8  -2 -18  188.19   92.39
  -8  -2 -18   33.17   23.62
   8  -4 -26   41.50   34.64
   8   4 -25  157.35  102.97
   8  -4 -25  246.81  128.74
   8   4 -24   58.74   69.89
   8  -4 -24   50.68   48.37
   8  -4 -23   66.75   67.07
  -8  -4  23   11.51   49.86
   8  -4 -22    4.03   68.21
  -8  -4  22  136.69   75.49
   8  -4 -21  839.77  265.63
  -8  -4  21  689.73  191.58
   8  -4 -20   64.04   68.50
  -8  -4  20   76.02   30.73
   8  -4 -19 1106.18  424.00
  -8  -4  19 1235.50  509.94
   8  -4 -18   96.87   41.07
  -8  -4  18  116.27   79.06
   8  -4 -17 1587.87  423.71
  -8  -4  17 1665.31  359.42
   8  -4 -16 3435.23  706.28
  -8  -4  16 3334.25  675.29
   8  -4 -15 3292.01  673.65
  -8  -4  15 3542.60  719.76
   8  -4 -14 5101.94  240.27
  -8  -4  14 4843.61  256.74
   8  -4 -13 1182.45  346.05
  -8  -4  13 1587.22  310.23
  -8  -4  12 1524.26  373.95
   8  -4 -12 1378.68   87.40
   8  -4 -11 8599.36  569.81
  -8  -4  11 8769.84  368.56
   8  -4 -11 7832.99  343.26
  -8   4  11 8520.18  313.39
   8  -4 -10 5913.25  410.43
  -8  -4  10 5806.63  294.23
   8  -4 -10 5071.90  189.44
  -8   4  10 5668.30  234.39
   8  -4  -9 1124.15  306.20
  -8  -4   9 1040.56  228.68
   8  -4  -9 1029.83   68.47
  -8   4   9 1100.87  145.94
   8  -4  -8  392.46  144.59
  -8  -4   8  440.15   82.92
   8  -4  -8  389.48   81.48
  -8   4   8  416.46   61.29
   8  -4  -7 6620.39  315.00
  -8  -4   7 6134.72  376.83
   8  -4  -7 5958.96  338.85
   8  -4  -7 5878.65  299.50
  -8   4   7 6496.76  296.32
   8  -4  -6   38.62   29.47
   8   4  -6   78.50   20.94
  -8  -4   6   92.91   55.51
   8  -4  -6   47.86   21.80
   8  -4  -6   23.02   17.76
  -8   4   6   24.63   33.20
   8  -4  -510129.20  348.39
   8   4  -5 9928.49  323.24
  -8  -4   5 9964.49  399.72
   8  -4  -5 9627.83  308.27
   8  -4  -5 9862.06  323.05
  -8   4   511105.40  361.08
   8  -4  -4  221.58   43.59
   8   4  -4  216.72   53.79
   8   4  -4  274.42   70.25
  -8   4   4  142.48   45.62
  -8   4   3  138.39   28.31
   8  -4  -3   96.72   54.49
   8   4  -3  113.56   43.44
  -8  -4   3   62.81   29.55
   8   4  -3  128.92   39.98
  -8   4   3  136.78   65.61
  -8  -4   3  158.47   64.63
  -8   4   3   85.09   55.07
  -8   4   2   24.19   22.02
   8  -4  -2   34.23   18.42
   8   4  -2   20.73   21.55
  -8  -4   2   14.65   13.93
   8   4  -2    4.45   23.58
  -8  -4   2   66.57   36.37
  -8   4   2   20.54   36.90
  -8   4   2   29.71   29.72
  -8   4   1  942.38   97.89
   8  -4  -1  880.47  109.20
   8   4  -1  684.85  150.64
  -8  -4   1  983.17   99.58
   8   4  -1  771.17   69.43
  -8  -4   1 1038.89  265.36
  -8   4   1  937.84  225.58
  -8   4   1  889.26  218.49
  -8   4   1  919.81  187.14
  -8  -4   1 1232.93  260.48
  -8   4   1  716.36  214.39
  -8   4   0 9181.16  239.85
   8   4   0 9693.89  341.29
  -8  -4   0 9398.45  243.95
  -8   4   0 9462.82  310.59
  -8  -4   0 8862.12  318.78
  -8   4   0 9060.67  452.64
  -8   4   0 9497.78  299.21
  -8  -4   0 9711.90  328.45
  -8   4   010113.40  319.75
  -8   4  -115419.10  312.59
   8   4   115197.40  368.56
  -8  -4  -115057.30  358.30
   8  -4   115000.40  303.23
  -8   4  -116403.50  482.70
  -8  -4  -115512.00  442.81
  -8   4  -114983.60  416.24
  -8  -4  -116007.40  420.69
  -8   4  -116066.00  435.14
  -8   4  -116367.30  458.90
  -8   4  -2 1108.60   69.28
   8   4   2 1118.02   89.82
  -8  -4  -2 1367.23  160.23
  -8  -4  -2 1290.62  232.54
  -8   4  -2 1161.95  242.42
  -8  -4  -2 1026.25  256.22
  -8   4  -2 1172.08  324.99
  -8  -4  -2 1316.03  307.35
  -8   4  -2 1397.07  382.93
  -8   4  -2 1497.89  354.33
   8   4   3 5142.85  197.27
  -8   4  -3 4998.42  147.32
  -8  -4  -3 5256.92  143.95
   8  -4   3 4819.61  146.10
  -8  -4  -3 5066.08  217.15
  -8   4  -3 5166.43  227.28
  -8  -4  -3 4953.43  275.01
  -8   4  -3 4998.95  227.11
  -8  -4  -3 5335.79  194.96
  -8   4  -3 5264.72  202.33
  -8   4  -3 5193.42  233.71
  -8   4  -4  100.32   16.85
  -8  -4  -4  168.89   38.18
   8  -4   4   98.09   18.08
  -8   4  -4   68.27   41.09
  -8  -4  -4  146.52   48.74
  -8  -4  -4  117.41   78.78
  -8   4  -4   50.88   59.33
  -8   4  -4  120.41   36.58
  -8   4  -4  122.83   53.80
   8   4   5 1045.04  207.54
  -8  -4  -5 1013.17   66.17
   8  -4   5 1119.82   68.65
  -8   4  -5 1161.42  270.70
  -8  -4  -5 1212.67  221.45
  -8   4  -5 1069.84  217.72
   8   4   6  925.40  118.83
  -8  -4  -6 1130.11   87.16
  -8   4  -6  995.49   73.34
  -8   4  -6 1113.29  231.26
  -8  -4  -6 1519.62  338.65
  -8   4  -6 1334.04  325.16
  -8   4  -7 3494.34  175.08
   8   4   7 3543.58  251.18
  -8  -4  -7 3653.30  203.54
  -8   4  -7 3196.96  132.28
  -8   4  -7 3516.15  299.68
  -8  -4  -7 3458.52  213.67
  -8  -4  -7 3644.81  251.08
  -8   4  -7 3315.39  193.53
  -8   4  -8   12.39   13.14
  -8  -4  -8   21.21   26.98
  -8   4  -8    5.85   10.01
  -8   4  -8   56.46   31.04
  -8  -4  -8   54.19   47.31
  -8  -4  -8   25.56   43.89
  -8   4  -8   57.82   36.53
  -8   4  -9    6.07    8.50
  -8  -4  -9   17.84   13.47
  -8   4  -9   21.80   26.34
  -8   4  -9   40.56   42.10
  -8  -4  -9   30.70   32.67
  -8  -4  -9   49.29   62.22
  -8   4  -9   40.21   45.08
  -8   4 -10  121.39   50.07
  -8  -4 -10  104.91   56.84
  -8   4 -10  134.23   49.98
  -8  -4 -10   59.22   46.61
  -8  -4 -10  177.55   68.40
  -8   4 -10  119.25   89.09
  -8   4 -11   30.90   18.90
  -8  -4 -11   14.58   19.34
  -8   4 -11   87.99   51.37
  -8  -4 -11   26.68   54.12
  -8  -4 -11   17.35   28.24
  -8   4 -11   56.85   73.61
  -8   4 -12  102.03   36.55
  -8  -4 -12  214.71   76.88
  -8   4 -12  283.20   93.36
  -8  -4 -12  180.11   58.64
  -8  -4 -12  176.30  100.81
  -8   4 -12  296.06   66.06
  -8   4 -13   99.77   19.22
  -8  -4 -13   43.52   20.17
  -8   4 -13   85.06   34.44
  -8  -4 -13   82.73   58.82
  -8  -4 -13   48.61   51.37
  -8   4 -13  105.08   35.11
  -8  -4 -14   81.34   12.49
  -8   4 -14   73.58   53.46
  -8  -4 -14   20.78   40.08
  -8  -4 -14   19.80   26.74
  -8   4 -14   50.51   44.85
  -8   4 -15  101.76   55.07
  -8  -4 -15   29.35   38.92
  -8  -4 -15   12.04   27.58
  -8   4 -16   30.86   41.41
  -8  -4 -16  102.65   52.40
  -8  -4 -16   45.22   24.43
  -8   4 -16   51.48   40.01
  -8   4 -17   89.17   67.90
  -8  -4 -17   50.40   48.23
  -8  -4 -17   41.73   25.21
  -8   4 -17   69.69   37.59
  -8   4 -18   99.18   58.06
  -8  -4 -18   87.28   68.59
  -8  -4 -18   82.46   33.44
  -8   4 -18   53.28   35.24
   8  -6 -25   97.23   78.52
  -8  -6  25   85.89  108.66
   8  -6 -24  623.14  228.98
  -8  -6  24  506.39  180.73
   8  -6 -23   67.48   66.36
  -8  -6  23   67.03   50.67
   8  -6 -22   29.70   63.90
  -8  -6  22   85.29   43.56
   8  -6 -21   82.32   42.99
  -8  -6  21   54.17   91.74
   8  -6 -20   13.28   39.93
  -8  -6  20  127.54   77.16
   8  -6 -19   51.60   51.37
  -8  -6  19  169.11   84.52
   8  -6 -18  259.03  127.96
   8  -6 -17  327.04   92.68
  -8  -6  17  291.01   70.53
   8  -6 -16 1094.99  248.76
  -8  -6  16 1018.39  193.16
   8  -6 -15  225.85   94.30
  -8  -6  15  107.06   68.82
   8  -6 -15   58.62   12.86
   8  -6 -14  182.65   89.69
  -8  -6  14  229.50   82.67
   8  -6 -13 7772.96  521.58
  -8  -6  13 7720.33  570.80
   8  -6 -13 6762.71  349.59
   8  -6 -12 1233.18  239.34
  -8  -6  12 1375.70  314.13
   8  -6 -12  916.13   96.90
  -8   6  12 1177.26  134.22
  -8  -6  11 1107.50  240.31
   8  -6 -11  620.01  138.04
   8  -6 -10  128.61   41.44
  -8  -6  10  159.31  101.24
   8  -6 -10   66.44   36.03
   8  -6  -9  655.59  113.19
  -8  -6   9  674.96  116.37
   8  -6  -9  416.16   96.26
   8  -6  -8 4118.37  236.28
  -8  -6   8 4497.35  205.55
   8  -6  -8 3891.73  199.72
   8  -6  -7 2821.73  156.09
  -8  -6   7 2590.57  163.47
   8  -6  -7 2348.33  282.56
   8  -6  -6 1093.04  239.47
  -8  -6   6 1194.89  115.19
   8  -6  -6  875.26  181.24
  -8   6   5  177.99   30.50
   8  -6  -5  151.82   47.76
  -8  -6   5  116.52   58.74
   8   6  -5  133.51   21.41
  -8   6   4  390.96   72.54
   8  -6  -4  648.47  102.44
  -8  -6   4  783.91  127.68
   8   6  -4  386.45   75.34
  -8  -6   4  659.76  154.53
  -8   6   4  440.18   86.87
  -8   6   3 1738.21  102.64
   8  -6  -3 1816.87  190.34
   8   6  -3 1763.82   93.63
  -8  -6   3 1832.77  171.26
   8   6  -3 1698.88   91.57
  -8  -6   3 2017.18  110.35
  -8   6   3 1903.06  228.94
  -8   6   3 1962.61  138.77
  -8   6   2 1276.04  107.65
   8  -6  -2 1505.14   84.23
   8   6  -2 1315.98  167.01
  -8  -6   2 1418.98   98.34
   8   6  -2 1233.89  149.51
  -8  -6   2 1807.50  202.22
  -8   6   2 1442.90  367.11
  -8   6   2 1442.28  340.33
  -8   6   1 3488.57  238.14
   8   6  -1 3402.68  179.63
   8  -6  -1 3655.76  180.12
  -8  -6   1 3502.78  197.81
   8   6  -1 3281.99  171.41
  -8  -6   1 3331.72  221.49
  -8   6   1 3493.61  213.83
  -8  -6   1 4000.76  369.38
  -8   6   1 3614.82  236.29
  -8   6   0 3681.80  151.92
   8   6   0 3583.30  161.27
  -8  -6   0 3854.29  184.57
   8  -6   0 3992.41  201.05
  -8   6   0 4164.74  199.37
  -8  -6   0 3703.76  170.86
  -8   6   0 3694.71  193.46
  -8  -6   0 3891.81  167.31
  -8   6   0 3882.71  195.32
  -8   6  -1   32.13   23.02
   8   6   1   13.94   29.07
  -8  -6  -1   64.59   26.05
   8  -6   1   82.60   21.87
  -8   6  -1   57.70   28.02
  -8  -6  -1  114.84   44.26
  -8  -6  -1   38.86   29.72
  -8   6  -1    1.75   34.42
  -8   6  -1   41.50   61.03
   8   6   2 7762.94  331.15
  -8   6  -2 7706.20  265.84
  -8  -6  -2 7471.92  338.57
   8  -6   2 7851.12  272.47
  -8   6  -2 8403.57  346.75
  -8  -6  -2 7865.37  394.47
  -8  -6  -2 7512.66  307.43
  -8   6  -2 7821.13  330.26
  -8   6  -2 7585.48  333.49
   8   6   3  214.85   58.80
  -8   6  -3  217.47   40.65
  -8  -6  -3  198.91   51.30
   8  -6   3  249.76   46.10
  -8  -6  -3  150.60   95.81
  -8   6  -3  167.88  136.33
  -8   6  -3  326.35   86.78
  -8   6  -4 8390.86  303.98
  -8  -6  -4 9388.35  342.41
   8  -6   4 8908.84  295.89
  -8   6  -4 9759.14  465.94
  -8  -6  -4 9560.16  369.27
  -8   6  -5  255.62   44.07
  -8  -6  -5  344.32   78.55
   8  -6   5  315.77   77.68
  -8   6  -5  339.55   79.75
  -8  -6  -5  374.29  124.08
  -8  -6  -5  337.69   89.14
  -8   6  -5  350.39   78.40
  -8  -6  -6  -19.15   21.66
   8  -6   6    3.98   15.52
  -8   6  -6   60.15   78.45
  -8  -6  -6  129.13   80.01
  -8   6  -6  163.24   49.91
  -8  -6  -7 3574.74  272.51
   8  -6   7 3446.18  112.05
  -8   6  -7 4128.56  286.75
  -8  -6  -7 4210.96  302.39
  -8  -6  -7 3931.57  737.23
  -8   6  -7 3363.38  192.04
  -8  -6  -8   40.83   20.95
  -8   6  -8   13.51   14.94
   8  -6   8  106.26   25.59
  -8   6  -8  105.47  103.70
  -8  -6  -8   44.60   32.23
  -8  -6  -8  120.82   62.44
  -8   6  -8   76.99   53.11
  -8  -6  -9   84.95   62.33
   8  -6   9   38.03   26.68
  -8   6  -9  173.64   69.96
  -8  -6  -9   29.22   53.50
  -8  -6  -9   15.22   24.02
  -8   6  -9   43.06   33.11
  -8  -6 -10  873.43  162.81
   8  -6  10  804.89  185.32
  -8   6 -10  800.26  197.45
  -8  -6 -10  899.66  174.66
  -8  -6 -10  888.64  227.06
  -8   6 -10 1009.72  297.50
  -8  -6 -11  121.31   23.42
  -8   6 -11   39.73   57.47
  -8  -6 -11  160.03   54.97
  -8  -6 -11  130.65   61.44
  -8   6 -11   58.23   54.74
  -8   6 -12   29.39   19.88
  -8  -6 -12   61.27   32.91
  -8   6 -12   38.87   38.98
  -8  -6 -12   -6.49   37.73
  -8  -6 -12   93.23   72.85
  -8   6 -12   79.68   46.22
  -8  -6 -13  323.67   89.27
  -8   6 -13  108.17   58.31
  -8  -6 -13  286.25   62.75
  -8  -6 -13  406.53   85.19
  -8   6 -13  372.70   97.71
  -8  -6 -14  158.12   43.12
  -8   6 -14  176.54   63.25
  -8  -6 -14  256.73   93.38
  -8  -6 -14   86.60   59.00
  -8   6 -14  166.85   73.81
  -8  -6 -15   28.08   34.66
  -8   6 -15   81.07   62.62
  -8  -6 -15   49.91   29.76
  -8  -6 -15   14.48   27.88
  -8   6 -15   75.21   26.99
  -8   6 -16   43.83   27.46
  -8  -6 -16   76.40   41.96
  -8  -6 -16   17.40   43.34
  -8   6 -16   45.64   24.60
  -8   6 -17   46.36   28.84
  -8  -6 -17   26.72   38.13
  -8  -6 -17  154.86   53.29
  -8   6 -17   13.74   23.90
   8  -8 -25   52.86   55.12
  -8  -8  25   96.36   35.24
   8  -8 -24   32.52   54.33
  -8  -8  24  129.89   80.19
   8  -8 -23  133.59   68.30
  -8  -8  23  255.91  132.49
   8  -8 -22  148.10   52.47
  -8  -8  22   38.78   42.82
   8  -8 -21   14.38   50.43
  -8  -8  21   85.27   54.02
   8  -8 -20   58.99   74.41
  -8  -8  20   60.01   48.43
   8  -8 -19   98.21   90.61
  -8  -8  19   78.75   48.96
   8  -8 -18  114.35   59.33
  -8  -8  18   51.88   83.48
   8  -8 -17  300.37  219.76
  -8  -8  17  569.01  149.30
   8  -8 -16  248.75   80.16
  -8  -8  16  384.61   94.81
   8  -8 -15  152.32   71.50
   8  -8 -14 1662.05  362.30
  -8  -8  14 2150.48  186.39
   8  -8 -13 1381.98  397.37
  -8  -8  13 1325.91  292.56
   8  -8 -12  389.93  145.79
  -8  -8  12  600.36  181.44
   8  -8 -11 2085.74  473.00
  -8  -8  11 1996.29  498.48
  -8  -8  10  549.16  136.81
   8  -8  -9  137.21   80.87
  -8  -8   9   69.19   61.05
   8  -8  -8  533.78  124.29
  -8  -8   8  477.12  118.25
   8  -8  -710479.80  420.51
  -8  -8   710907.30  429.82
   8  -8  -6   58.26   47.94
  -8  -8   6  100.06   45.04
   8  -8  -5   40.40   22.33
  -8  -8   5   41.64   46.37
   8   8  -5   56.63   17.72
   8  -8  -4 1188.34  130.90
  -8  -8   4 1299.59  129.53
   8   8  -4  927.72  219.88
  -8  -8   4  978.81  201.42
  -8   8   3  725.56  214.31
   8  -8  -3 1016.07  208.71
  -8  -8   3  914.02  197.31
   8   8  -3  743.52  151.63
  -8  -8   3 1048.27  155.54
  -8   8   3 1045.38  269.18
  -8   8   2   67.31   24.39
   8  -8  -2   40.67   33.08
  -8  -8   2   61.32   39.95
   8   8  -2   11.51   21.70
  -8   8   2   62.80   32.04
  -8  -8   2   59.38   27.55
  -8   8   1   50.34   24.83
   8  -8  -1   17.95   29.45
  -8  -8   1   83.70   27.00
   8   8  -1   14.18   16.58
  -8   8   1   93.83   39.35
  -8  -8   1   61.08   41.36
  -8   8   0  429.30  137.37
  -8  -8   0  697.98  149.08
   8  -8   0  623.78  116.30
  -8  -8   0  630.25  155.37
  -8   8   0  655.92  103.75
  -8   8   0  787.97  156.54
  -8  -8   0  670.63  162.70
  -8   8  -1  947.97  226.27
   8  -8   1 1336.28  172.12
  -8  -8  -1 1407.62  319.87
  -8   8  -1 1560.25  316.17
  -8  -8  -1 1320.71  116.80
  -8  -8  -1 1148.48  257.15
  -8   8  -1 1384.55  317.45
  -8   8  -2 1841.29  161.51
  -8  -8  -2 2614.72  372.41
   8  -8   2 2066.28  106.44
  -8   8  -2 2396.86  184.06
  -8  -8  -2 1991.38  234.41
  -8   8  -2 2464.20  140.04
  -8   8  -2 1881.84  164.72
  -8   8  -3  505.42   84.58
  -8  -8  -3  662.13  130.35
   8  -8   3  741.97  116.13
  -8  -8  -3  589.43  130.16
  -8   8  -3  627.54  234.94
  -8   8  -3  654.10  130.12
  -8   8  -3  589.98  152.00
  -8   8  -4 3517.71  147.92
  -8  -8  -4 3747.77  220.99
   8  -8   4 4134.72  176.48
  -8  -8  -4 3905.83  249.60
  -8   8  -4 3787.91  245.34
  -8   8  -4 3792.71  253.22
  -8   8  -5   40.01   11.20
  -8  -8  -5   91.71   44.74
   8  -8   5   38.15   20.06
  -8  -8  -5   64.19   20.12
  -8   8  -5   52.34   57.86
  -8   8  -5   32.28   45.27
  -8  -8  -6 2635.02  169.61
  -8   8  -6 2084.53  166.14
   8  -8   6 2609.10  215.49
  -8   8  -6 2303.99  485.81
  -8   8  -6 2614.16  443.05
  -8  -8  -7   44.11   27.59
  -8   8  -7   37.26   16.69
   8  -8   7   37.06   32.98
  -8   8  -7  141.81   46.49
  -8  -8  -7  111.22   72.23
  -8   8  -7  142.68   79.27
  -8  -8  -8  136.92   64.79
   8  -8   8  154.16   54.76
  -8   8  -8  211.69   92.01
  -8  -8  -8  356.15   70.93
  -8  -8  -8  474.28  127.81
  -8   8  -8  245.87  118.56
  -8  -8  -9   86.76   37.80
   8  -8   9  118.14   28.09
  -8   8  -9   74.75   74.64
  -8  -8  -9   92.04   44.08
  -8  -8  -9   90.96   64.61
  -8   8  -9  111.98   58.51
  -8  -8 -10   33.74   44.76
   8  -8  10   -1.04    8.45
  -8   8 -10   48.96   47.62
  -8  -8 -10   49.06   44.74
  -8  -8 -10   28.88   35.58
  -8   8 -10   84.51   28.38
  -8  -8 -11 1185.46  193.33
   8  -8  11  881.78  262.56
  -8   8 -11 1048.11  160.99
  -8  -8 -11 1087.07  297.46
  -8  -8 -11  908.31  393.84
  -8   8 -11  933.48  272.43
  -8  -8 -12   27.52   25.98
  -8   8 -12  126.66   48.84
  -8  -8 -12   80.25   42.65
  -8  -8 -12   73.51   56.61
  -8   8 -12  107.09   70.41
  -8  -8 -13   46.94   38.43
  -8  -8 -13   27.52   21.33
[truncated: 1,845,270 more chars]
